# Supplementary material for: Kalman filter inversions on NO x and VOCs emissions in China using TROPOMI satellite observations
Source: Copernicus journal article supplement (doi:10.5194/egusphere-2025-2687), 2025-08-27
Supplement: Supplementary file 1 [file Fig2.xlsx]

## Sheet: Fig2.d
NC	NC	NEC	NEC	CC	CC	EC	EC	SC	SC	NWC	NWC	NSC	NSC
36.605	37.016	5.233	5.219	34.67	35.253	63.681	64.3	4.617	4.604	22.851	23.242	26.446	26.456
11.403	11.583	5.133	5.118	34.53	35.114	64.034	64.641	5.371	5.356	16.34	16.604	24.743	24.752
28.496	28.819	5.17	5.153	34.189	34.793	55.4	55.928	8.475	8.451	12.475	12.666	28.53	28.54
37.395	37.802	6.061	6.035	32.315	32.825	65.449	66.071	12.78	12.744	18.802	19.112	32.769	32.788
25.979	26.279	5.316	5.301	34.835	35.417	57.6	58.142	5.39	5.376	18.922	19.237	19.659	19.666
28.719	29.063	5.968	5.945	34.797	35.383	64.528	65.124	6.011	6.018	21.122	21.477	23.916	23.922
24.149	24.455	5.612	5.592	33.316	33.811	63.414	64.025	5.23	5.216	20.483	20.83	30.966	30.983
13.491	13.644	5.395	5.378	34.787	35.357	43.026	43.422	12.104	12.082	18.538	18.836	23.249	23.253
7.637	7.729	5.867	5.844	33.605	34.205	62.271	62.858	5.871	5.854	7.628	7.742	20.127	20.127
13.844	14.056	5.931	5.907	61.246	61.947	58.526	59.07	7.583	7.603	7.498	7.597	27.401	27.412
22.705	22.991	6.787	6.754	71.403	72.292	71.398	72.324	1.551	1.55	23.476	23.882	23.465	23.47
27.108	27.448	3.033	3.032	78.418	79.376	66.996	67.81	1.559	1.557	16.062	16.318	32.572	32.591
42.636	42.941	3.139	3.138	65.874	66.685	69.969	70.854	1.819	1.818	12.958	13.159	21.79	21.793
43.144	43.465	2.814	2.813	58.791	59.365	69.02	69.835	1.763	1.762	4.254	4.267	31.529	31.548
43.754	44.084	2.665	2.663	45.416	46.166	72.108	72.995	1.703	1.702	5.632	5.658	28.893	28.907
43.181	43.491	2.589	2.587	73.528	74.423	71.644	72.567	2.721	2.717	1.148	1.147	19.266	19.263
42.402	42.703	2.812	2.811	46.119	46.68	57.118	57.689	1.865	1.863	3.687	3.69	19.411	19.409
41.696	41.992	4.816	4.815	84.626	85.668	64.638	65.352	1.245	1.245	3.489	3.494	5.321	5.321
42.424	42.751	1.878	1.877	13.406	13.778	78.272	79.336	2.069	2.067	3.645	3.684	4.408	4.408
40.287	40.57	1.585	1.584	4.146	4.2	53.265	53.81	1.802	1.8	3.776	3.817	5.422	5.42
39.576	39.852	1.024	1.023	3.927	3.97	56.45	57.013	2.657	2.652	3.044	3.073	4.916	4.916
8.399	8.393	4.269	4.266	4.092	4.142	55.073	55.637	1.168	1.167	2.838	2.869	4.996	4.995
11.735	11.776	4.081	4.077	4.04	4.08	55.49	56.064	1.026	1.026	2.319	2.299	5.626	5.625
29.293	29.481	3.756	3.751	4.183	4.22	55.882	56.441	1.724	1.722	4.025	3.988	5.332	5.331
10.104	10.126	4.187	4.184	4.378	4.437	53.143	53.697	1.439	1.439	3.984	3.953	6.798	6.794
29.652	29.849	4.03	4.027	4.197	4.244	57.527	58.096	2.645	2.639	3.587	3.559	3.66	3.658
21.924	22.442	3.877	3.867	4.212	4.246	56.636	57.229	2.986	2.979	4.106	4.064	3.33	3.328
22.878	23.44	3.108	3.096	3.994	4.028	39.146	39.502	3.17	3.162	3.949	3.911	3.754	3.751
22.73	23.25	4.432	4.426	4.61	4.68	37.519	37.869	2.185	2.181	2.751	2.777	3.785	3.783
22.031	22.567	3.604	3.598	2.59	2.607	34.523	34.845	1.984	1.981	2.663	2.688	2.541	2.539
22.67	23.227	3.634	3.629	2.391	2.406	41.667	42.047	1.677	1.675	3.177	3.208	2.845	2.843
22.506	23.044	7.521	7.521	2.674	2.691	32.529	32.835	2.307	2.303	2.893	2.921	3.65	3.648
20.168	20.656	7.809	7.809	2.202	2.215	2.603	2.62	2.34	2.337	2.794	2.82	3.335	3.333
23.086	23.322	2.966	2.973	3.096	3.117	2.605	2.621	2.15	2.146	2.537	2.56	3.146	3.144
23.954	24.202	6.741	6.744	2.318	2.334	1.949	1.96	2.184	2.18	2.555	2.577	0.985	0.985
23.055	23.291	6.277	6.286	2.731	2.751	2.214	2.227	2.086	2.082	23.893	24.306	0.962	0.962
22.623	22.853	6.66	6.667	2.452	2.47	13.911	13.963	2.158	2.154	24.796	25.229	0.922	0.922
23.687	23.932	6.265	6.273	2.366	2.383	12.787	12.834	1.376	1.375	24.66	25.089	1.026	1.026
22.065	22.288	6.449	6.455	2.46	2.478	13.955	14.011	1.364	1.363	25.357	25.799	0.997	0.997
5.993	5.983	6.953	6.957	2.1	2.115	12.418	12.463	1.359	1.358	4.97	5.049	1.008	1.008
5.966	5.951	5.678	5.683	3.204	3.227	13.356	13.408	1.37	1.369	5.189	5.271	0.977	0.977
6.088	6.079	5.867	5.868	2.14	2.153	12.741	12.79	7.749	7.731	7.337	7.45	0.278	0.278
6.121	6.111	6.346	6.351	19.556	19.768	12.698	12.742	7.642	7.624	7.75	7.869	0.28	0.28
6.207	6.199	1.963	1.959	20.139	20.357	111.967	113.161	8.081	8.062	0.741	0.741	0.275	0.275
14.07	14.535	1.985	1.981	20.036	20.253	113	114.207	7.059	7.042	0.786	0.786	0.282	0.282
13.856	14.312	1.958	1.954	19.645	19.858	120.625	121.934	6.366	6.351	0.782	0.782	0.265	0.265
13.764	14.215	1.936	1.932	19.489	19.7	111.458	112.646	9.54	9.524	0.805	0.805	0.272	0.272
14.074	14.538	1.114	1.113	19.931	20.147	59.95	60.643	9.845	9.828	5.847	5.937	2.049	2.048
29.63	30.119	0.974	0.974	20.131	20.35	67.482	68.27	10.168	10.151	5.387	5.471	0.728	0.728
30.243	30.734	1.081	1.081	10.895	11.218	62.383	63.111	4.267	4.26	6	6.093	0.743	0.743
28.94	29.414	1.099	1.099	12.012	12.39	61.73	62.445	3.079	3.075	5.898	5.989	0.74	0.74
29.578	30.067	1.92	1.92	12.112	12.491	61.762	62.487	1.877	1.876	5.532	5.618	2.645	2.654
29.18	29.66	2.017	2.016	12.224	12.606	61.41	62.13	1.887	1.885	5.877	5.961	2.643	2.652
29.929	30.421	1.519	1.518	12.088	12.47	64.809	65.563	1.923	1.921	6.232	6.328	2.561	2.57
2.641	2.674	2.366	2.358	20.496	20.97	66.561	67.335	1.893	1.891	6.159	6.254	2.566	2.575
2.673	2.706	2.424	2.417	20.739	21.213	92.017	93.048	1.209	1.208	5.502	5.584	8.872	8.871
2.667	2.7	2.404	2.396	19.862	20.32	99.723	100.825	1.284	1.282	5.465	5.546	8.527	8.526
2.697	2.73	2.439	2.432	22.151	22.662	96.508	97.58	1.247	1.245	5.627	5.709	8.591	8.59
2.394	2.424	3.975	3.97	28.835	29.446	89.021	90.025	1.139	1.137	5.97	6.058	8.676	8.676
4.064	4.093	3.51	3.507	28.651	29.253	95.315	96.377	1.068	1.067	1.378	1.391	7.517	7.516
4.493	4.525	4.361	4.355	28.082	28.656	109.097	110.292	1.319	1.317	1.37	1.383	9.424	9.423
4.191	4.221	3.434	3.431	28.781	29.391	116.61	117.813	1.069	1.068	1.338	1.35	1.282	1.282
4.836	4.871	3.28	3.277	38.102	38.43	122.988	124.306	1.213	1.212	1.717	1.737	1.184	1.183
4.656	4.69	3.398	3.395	37.894	38.221	123.645	124.973	0.961	0.961	3.562	3.51	1.319	1.319
42.799	43.203	2.756	2.756	38.115	38.443	44.31	44.738	0.955	0.954	3.638	3.59	1.244	1.244
41.546	41.938	4.81	4.801	38.969	39.303	47.88	48.344	0.959	0.958	5.081	5.042	16.124	16.123
42.068	42.466	4.969	4.961	6.567	6.629	85.788	86.641	0.97	0.97	4.582	4.537	15.56	15.558
42.88	43.279	4.4	4.402	6.455	6.52	49.847	50.332	0.965	0.964	0.998	1.004	14.529	14.528
9.082	9.102	4.482	4.478	6.508	6.573	9.932	9.992	2.989	2.996	1.017	1.022	15.105	15.104
10.215	10.239	4.562	4.563	6.422	6.488	11.244	11.315	2.917	2.924	0.925	0.929	14.329	14.327
9.91	9.933	5.117	5.106	5.82	5.905	10.416	10.48	2.959	2.966	1.128	1.136	14.423	14.421
8.4	8.484	2.065	2.065	6.707	6.823	15.489	15.599	2.767	2.774	0.678	0.68	14.339	14.337
8.56	8.656	2.361	2.361	7.171	7.3	9.608	9.665	3.083	3.094	1.234	1.237	14.551	14.549
8.342	8.427	2.334	2.334	6.504	6.614	4.181	4.209	3.049	3.044	1.161	1.163	2.533	2.538
16.428	16.91	2.196	2.196	5.673	5.753	4.138	4.167	3.02	3.015	1.106	1.108	2.471	2.476
16.342	16.832	2.045	2.045	10.927	11.283	4.438	4.469	2.895	2.891	3.505	3.54	2.513	2.518
16.374	16.851	2.212	2.212	10.998	11.357	3.956	3.983	2.737	2.734	3.191	3.219	2.45	2.454
16.369	16.858	2.172	2.171	11.023	11.381	6.122	6.146	2.638	2.635	3.326	3.357	14.581	14.603
12.899	13.298	2.138	2.133	10.477	10.745	6.004	6.027	1.977	1.975	3.072	3.098	15.094	15.117
12.844	13.242	2.069	2.068	12.978	13.256	6.321	6.346	1.043	1.042	1.088	1.089	14.673	14.694
12.118	12.494	2.166	2.165	12.666	12.94	5.861	5.884	1.011	1.01	0.988	0.987	16.217	16.242
5.084	5.205	2.226	2.227	14.624	14.898	40.902	41.289	0.987	0.986	0.988	0.987	16.188	16.213
6.68	6.861	6.564	6.517	11.216	11.499	28.216	28.448	0.985	0.984	0.979	0.979	14.091	14.112
12.325	12.704	6.877	6.828	10.822	11.072	2.475	2.495	1.041	1.04	3.782	3.799	5.972	5.97
10.161	10.467	5.88	5.831	4.744	4.905	44.901	45.336	0.99	0.99	3.597	3.613	5.967	5.964
13.39	13.809	6.84	6.794	4.495	4.644	34.262	34.569	1.569	1.567	3.548	3.564	6.084	6.082
7.79	8.009	6.414	6.365	4.767	4.93	40.498	40.881	1.803	1.801	1.151	1.16	5.956	5.954
2.798	2.832	7.292	7.244	4.804	4.969	38.383	38.739	1.722	1.72	1.132	1.141	6.03	6.028
2.882	2.919	3.05	3.053	5.422	5.618	34.679	34.989	1.565	1.563	2.842	2.797	0.966	0.966
2.972	3.013	3.062	3.065	2.191	2.213	43.082	43.486	1.66	1.657	2.844	2.799	1.002	1.002
2.814	2.85	3.063	3.066	2.178	2.2	43.152	43.568	1.646	1.644	1.978	2.002	2.556	2.574
2.961	3.004	3.247	3.252	2.035	2.054	29.765	30.019	1.637	1.634	2.853	2.876	2.67	2.689
2.951	2.991	3.095	3.098	1.763	1.778	36.395	36.656	2.391	2.39	2.433	2.455	2.753	2.773
2.688	2.719	6.306	6.328	2.862	2.886	45.331	45.677	2.397	2.397	1.285	1.292	2.665	2.684
2.841	2.876	6.228	6.25	5.25	5.287	36.561	36.827	2.415	2.415	1.332	1.339	10.958	10.984
6.801	6.869	6.137	6.158	5.338	5.376	42.45	42.768	18.243	18.271	1.559	1.571	10.258	10.281
5.839	5.897	6.088	6.109	5.338	5.375	49.153	49.526	17.782	17.809	1.548	1.561	11.485	11.513
7.915	7.996	6.433	6.455	5.349	5.386	43.836	44.165	17.815	17.842	2.91	2.948	8.144	8.158
6.289	6.352	4.134	4.118	9.612	9.726	42.881	43.205	1.713	1.712	2.92	2.958	9.765	9.766
6.814	6.882	3.473	3.473	9.596	9.71	7.329	7.38	1.685	1.685	2.002	2.026	9.575	9.576
7.58	7.657	3.273	3.269	9.627	9.739	8.778	8.838	1.696	1.696	2.001	2.025	9.689	9.69
1.544	1.552	3.532	3.536	9.716	9.832	11.352	11.429	3.704	3.721	1.752	1.762	9.81	9.811
1.517	1.525	3.337	3.338	11.906	12.312	8.019	8.074	3.489	3.505	2.433	2.456	7.556	7.553
1.057	1.061	1.236	1.236	11.28	11.682	36.385	36.742	4.073	4.088	1.866	1.878	8.575	8.571
1.115	1.12	1.226	1.226	11.413	11.827	30.433	30.708	2.728	2.724	0.901	0.9	8.262	8.258
1.431	1.439	3.562	3.569	25.198	26.072	31.569	31.858	2.84	2.836	0.886	0.885	8.262	8.258
4.729	4.802	3.434	3.44	23.045	23.824	36.662	37.002	2.782	2.779	0.589	0.593	11.71	11.704
4.219	4.28	3.238	3.244	26.739	27.569	35.492	35.818	2.186	2.184	1.137	1.142	10.859	10.854
4.033	4.09	3.347	3.353	23.929	24.758	36.301	36.637	1.976	1.975	1.128	1.133	11.121	11.115
4.346	4.41	3.487	3.493	6.005	6.086	51.789	52.218	2.13	2.128	0.258	0.258	11.113	11.107
4.439	4.503	5.044	5.035	6.043	6.131	54.508	54.967	2.233	2.231	1.871	1.882	32.674	32.682
4.065	4.121	5.686	5.675	5.972	6.047	16.532	16.648	2.078	2.077	0.98	0.989	35.785	35.792
5.293	5.41	5.638	5.627	5.955	6.027	17.89	18.006	2.039	2.037	0.583	0.583	35.367	35.374
5.453	5.571	5.669	5.658	28.112	28.436	17.521	17.64	2.031	2.029	1.873	1.889	34.245	34.252
5.963	6.093	8.226	8.167	29.152	29.485	19.855	19.941	1.332	1.33	0.215	0.215	35.768	35.775
5.458	5.575	8.105	8.049	30.11	30.439	14.737	14.803	1.511	1.509	0.206	0.206	4.316	4.313
5.286	5.401	7.95	7.894	17.079	17.281	18.052	18.124	1.504	1.502	0.861	0.867	4.79	4.787
4.819	4.976	6.376	6.331	17.965	18.179	4.552	4.596	1.525	1.523	2.173	2.181	5.017	5.014
4.922	5.082	2.427	2.435	18.032	18.247	4.621	4.666	1.015	1.015	2.09	2.098	5.053	5.051
4.903	5.063	2.436	2.444	17.53	17.739	4.549	4.593	0.851	0.851	2.009	2.016	5.273	5.271
4.879	5.037	2.422	2.43	18.021	18.188	6.23	6.296	0.94	0.94	2.013	2.013	2.839	2.838
4.853	5.011	2.395	2.403	19.156	19.336	6.35	6.418	0.956	0.956	1.485	1.478	2.673	2.672
4.964	5.127	6.114	6.073	17.709	17.873	6.373	6.442	1.803	1.8	1.973	1.979	2.681	2.68
9.931	10.161	5.781	5.743	19.931	20.119	3.792	3.827	1.886	1.884	1.153	1.156	2.625	2.624
8.437	8.641	5.625	5.589	18.425	18.597	3.867	3.903	1.965	1.963	1.664	1.676	3.922	3.924
10.31	10.548	2.085	2.082	7.898	7.953	3.598	3.631	1.783	1.781	1.523	1.532	3.808	3.81
11.109	11.363	2.08	2.077	7.906	7.961	14.168	14.197	2.049	2.046	1.309	1.316	3.891	3.893
9.899	10.129	1.273	1.273	7.88	7.936	14.398	14.433	1.686	1.683	1.304	1.311	3.932	3.934
8.719	8.926	1.343	1.343	7.866	7.922	13.963	13.999	0.719	0.719	1.156	1.161	5.571	5.572
2.382	2.398	2.721	2.725	10.904	11.022	12.653	12.695	0.721	0.72	0.97	0.973	5.406	5.407
2.484	2.5	2.708	2.711	10.981	11.1	14.023	14.059	1.759	1.758	2.738	2.759	5.647	5.647
2.341	2.356	2.277	2.279	10.962	11.081	12.629	12.669	1.797	1.796	2.431	2.454	5.984	5.985
2.848	2.863	2.216	2.218	7.796	7.992	14.956	14.988	1.642	1.64	2.383	2.405	5.84	5.841
10.207	10.448	1.362	1.365	7.238	7.414	15.34	15.37	1.714	1.712	0.907	0.91	0.185	0.185
10.931	11.188	1.359	1.362	7.795	7.989	15.06	15.088	1.407	1.406	0.938	0.942	0.184	0.184
11.364	11.631	1.98	1.978	8.696	8.914	12.645	12.686	1.273	1.272	0.604	0.604	0.183	0.183
11.358	11.625	1.984	1.982	7.962	8.164	5.878	5.908	1.396	1.395	0.613	0.613	0.393	0.393
9.405	9.618	1.984	1.981	7.89	7.941	6.135	6.166	1.388	1.388	0.992	0.991	0.391	0.391
7.768	7.951	4.154	4.166	8.034	8.091	5.341	5.366	1.39	1.389	1.293	1.294	1.18	1.179
3.055	3.083	4.047	4.058	7.858	7.913	3.842	3.86	1.416	1.415	1.353	1.354	1.13	1.13
3.064	3.091	3.97	3.981	7.904	7.957	4.444	4.464	1.098	1.097	1.312	1.313	1.126	1.126
3.221	3.251	4.195	4.207	8.523	8.58	5.337	5.363	1.045	1.044	1.024	1.021	1.129	1.129
2.98	3.007	1.158	1.158	8.752	8.812	3.587	3.592	1.07	1.069	1.011	1.008	1.124	1.123
2.807	2.831	1.207	1.207	8.301	8.356	3.832	3.834	1.074	1.073	1.511	1.52	2.364	2.364
5.795	5.953	1.207	1.207	7.991	8.042	3.191	3.193	1.019	1.018	1.586	1.596	2.506	2.505
6.156	6.326	1.051	1.05	16.631	16.997	8.85	8.938	1.031	1.031	1.494	1.503	2.631	2.63
6.19	6.36	1.558	1.56	14.113	14.436	8.814	8.901	1.022	1.021	0.659	0.661	2.548	2.547
7.236	7.349	1.634	1.637	21.163	21.563	7.827	7.903	1.525	1.524	0.309	0.309	2.852	2.851
7.138	7.251	1.573	1.576	7.808	7.892	9.194	9.286	1.564	1.563	0.323	0.323	2.358	2.357
7.394	7.513	1.678	1.682	7.954	8.049	8.409	8.493	1.166	1.165	2.046	2.07	2.396	2.394
7.143	7.26	0.961	0.961	7.938	8.024	9.098	9.189	1.167	1.166	2.115	2.14	2.464	2.462
8.447	8.719	0.967	0.967	7.787	7.87	6.956	7.022	1.346	1.345	3.063	3.091	2.471	2.47
7.61	7.849	0.685	0.685	35.684	36.422	9.412	9.505	1.321	1.319	1.552	1.568	1.354	1.354
6.704	6.908	1.782	1.786	38.979	39.743	9.115	9.206	1.335	1.334	0.524	0.528	1.345	1.344
1.532	1.551	1.813	1.817	22.263	22.758	6.511	6.47	1.711	1.709	4.042	4.012	2.077	2.076
1.541	1.561	1.806	1.81	23.702	24.264	6.5	6.475	1.702	1.7	4.031	3.993	2.105	2.104
3.854	3.831	1.817	1.821	11.077	11.243	6.68	6.643	0.7	0.7	3.782	3.748	3.72	3.717
3.535	3.515	1.82	1.824	10.931	11.096	6.937	6.905	0.697	0.697	1.5	1.504	3.588	3.585
3.658	3.637	4.194	4.207	10.733	10.901	6.852	6.819	7.555	7.535	1.131	1.14	1.032	1.032
4.014	4.034	4.787	4.801	10.307	10.468	6.409	6.382	3.927	3.941	3.653	3.691	1.134	1.133
3.842	3.859	4.895	4.91	5.254	5.296	6.762	6.726	2.783	2.78	2.125	2.14	0.269	0.269
4.041	4.061	1.101	1.1	5.549	5.595	5.296	5.282	2.433	2.427	24.517	24.945	0.273	0.273
1.866	1.878	1.1	1.099	5.457	5.501	6.781	6.803	2.548	2.541	1.376	1.39	2.468	2.467
1.877	1.889	1.096	1.096	0.903	0.905	14.438	14.514	3.129	3.119	15.012	15.265	2.501	2.5
2.627	2.654	0.821	0.822	0.953	0.955	11.148	11.203	3.968	3.956	13.064	13.282	0.26	0.26
2.286	2.307	0.882	0.882	1.286	1.289	9.575	9.619	2.503	2.497	12.029	12.23	0.259	0.258
1.981	1.999	5.759	5.713	1.317	1.321	12.357	12.42	2.211	2.208	13.701	13.928	0.257	0.257
2.497	2.533	5.78	5.755	1.286	1.289	10.873	10.925	2.535	2.529	13.824	14.055	0.297	0.297
2.603	2.641	5.252	5.239	1.263	1.266	9.083	9.124	3.962	3.955	14.42	14.66	0.296	0.296
1.29	1.294	6.591	6.596	1.279	1.282	17.497	17.588	2.656	2.649	13.927	14.163	0.33	0.33
1.303	1.306	10.697	10.601	1.292	1.295	14.87	14.946	3.783	3.797	13.453	13.67	0.33	0.33
1.225	1.228	17.092	16.908	1.406	1.41	6.495	6.518	1.267	1.266	7.956	8.086	0.572	0.572
0.864	0.868	19.826	19.598	1.35	1.353	6.801	6.825	1.27	1.269	11.127	11.315	0.567	0.567
0.842	0.846	26.101	25.814	1.373	1.376	6.223	6.246	1.394	1.393	14.942	15.196	0.692	0.691
1.253	1.253	15.817	15.657	1.3	1.303	6.257	6.281	1.371	1.37	12.748	12.958	0.618	0.618
1.272	1.271	23.752	23.507	1.284	1.287	6.289	6.218	1.244	1.243	12.345	12.553	0.635	0.635
1.288	1.287	22.141	21.898	3.62	3.68	6.385	6.309	1.724	1.721	3.625	3.612	0.561	0.56
0.557	0.558	19.375	19.167	3.436	3.488	6.335	6.263	1.418	1.417	3.185	3.173	0.577	0.576
0.556	0.557	23.757	23.503	3.314	3.363	4.591	4.606	0.917	0.916	3.671	3.67	0.275	0.275
6.015	6.147	24.727	24.46	3.588	3.644	4.061	4.073	1.22	1.219	4.35	4.335	0.278	0.278
12.695	12.748	27.24	26.975	3.418	3.47	4.551	4.565	1.254	1.253	3.973	3.959	0.5	0.5
24.823	24.969	7.522	7.523	0.895	0.897	4.397	4.412	1.762	1.759	1.36	1.347	0.508	0.508
42.671	42.976	7.746	7.747	0.854	0.857	7.594	7.622	0.868	0.868	1.425	1.412	0.192	0.192
22.685	23.235	9.625	9.626	0.852	0.855	7.691	7.72	0.769	0.769	1.257	1.241	0.195	0.195
5.658	5.809	9.047	9.048	0.893	0.895	7.442	7.469	1.264	1.263	0.917	0.91	0.281	0.281
6.936	7.041	9.89	9.892	0.881	0.884	5.914	5.928	0.897	0.897	1.288	1.291	0.281	0.281
1.546	1.566	10.561	10.562	0.979	0.979	5.94	5.954	1.748	1.745	2.288	2.298	0.234	0.234
42.329	42.73	7.96	7.961	1.087	1.087	5.968	5.983	1.887	1.883	2.16	2.173	0.233	0.232
43.069	43.376	6.411	6.409	0.99	0.99	6.468	6.427	1.972	1.968	1.952	1.963	0.156	0.156
4.357	4.42	8.83	8.827	1.099	1.099	6.476	6.434	1.612	1.609	2.237	2.248	0.156	0.156
4.805	4.961	8.918	8.915	1.148	1.148	6.221	6.184	1.499	1.496	2.101	2.112	0.337	0.337
43.054	43.373	8.332	8.324	1.086	1.086	8.357	8.273	1.363	1.361	2.151	2.18	0.338	0.338
2.595	2.634	8.322	8.312	1.064	1.064	8.24	8.158	1.39	1.388	2.069	2.096	0.245	0.245
1.322	1.325	8.515	8.5	1.049	1.049	7.625	7.518	1.356	1.354	2.476	2.509	0.242	0.242
29.975	30.17	8.429	8.419	1.063	1.063	8.158	8.067	1.523	1.52	2.279	2.31	0.263	0.263
2.874	2.889	8.44	8.429	0.992	0.992	8.34	8.252	1.544	1.542	2.188	2.217	0.267	0.267
1.918	1.931	8.14	8.123	2.311	2.325	8.096	8.022	1.467	1.465	1.95	1.976	0.374	0.374
2.685	2.718	5.771	5.751	2.311	2.325	6.127	6.141	1.52	1.517	2.058	2.083	0.375	0.374
12.752	13.147	8.002	7.992	2.279	2.292	9.704	9.714	1.043	1.042	14.372	14.616	0.45	0.45
23.004	23.868	8.574	8.557	2.477	2.493	6.442	6.46	1.028	1.028	15.133	15.384	0.449	0.449
11.964	12.392	8.436	8.421	2.301	2.314	7.389	7.411	1.025	1.025	15.029	15.284	1.294	1.294
21.132	21.925	7.198	7.223	1.433	1.438	5.073	5.083	1.035	1.035	15.676	15.94	5.629	5.628
23.462	24.339	6.991	7.016	1.492	1.497	15.288	15.392	2.797	2.79	3.338	3.389	1.037	1.037
20.479	21.25	6.529	6.551	1.442	1.447	13.561	13.652	2.832	2.824	3.513	3.567	0.734	0.733
20.734	21.519	7.23	7.255	22.234	22.729	15.217	15.321	2.891	2.883	4.413	4.486	0.764	0.764
19.424	20.165	6.627	6.651	7.78	7.864	12.494	12.58	2.693	2.685	4.872	4.952	34.199	34.207
15.367	15.914	6.889	6.914	6.03	6.116	18.198	18.325	2.628	2.621	1.102	1.11	3.763	3.765
10.634	10.996	6.861	6.885	19.992	20.209	11.415	11.499	1.767	1.765	1.145	1.153	3.862	3.864
14.551	15.098	7.054	7.079	6.545	6.609	6.947	6.875	1.797	1.795	1.145	1.153	24.219	24.226
19.492	20.239	7.116	7.141	23.209	23.856	6.799	6.731	1.8	1.798	1.159	1.167	22.638	22.645
19.526	20.261	7.988	8.016	29.364	29.698	6.814	6.746	1.773	1.77	4.407	4.462	19.374	19.371
11.045	11.144	5.04	5.057	4.762	4.925	6.869	6.8	1.288	1.286	4.148	4.198	14.652	14.65
11.097	11.211	7.425	7.451	4.596	4.75	5.838	5.796	1.118	1.117	4.468	4.525	14.271	14.269
10.988	11.101	2.379	2.377	4.879	5.047	13.277	13.307	1.118	1.117	4.418	4.474	0.599	0.599
11.207	11.31	2.6	2.598	12.213	12.594	13.875	13.907	1.143	1.142	4.273	4.326	0.375	0.375
11.413	11.516	2.346	2.344	20.299	20.769	14.106	14.139	1.12	1.119	4.867	4.932	2.356	2.355
11.158	11.259	2.287	2.286	7.141	7.312	5.912	5.859	1.241	1.24	4.588	4.646	2.435	2.433
11.062	11.191	2.48	2.479	47.657	48.23	6.108	6.054	1.311	1.31	4.606	4.665	2.382	2.38
11.932	12.044	1.801	1.801	28.467	29.063	6.046	5.993	1.277	1.275	8.587	8.726	2.436	2.435
12.131	12.242	2.282	2.282	6.573	6.625	2.326	2.328	1.18	1.178	8.624	8.765	0.264	0.264
18.771	18.884	2.313	2.313	6.478	6.53	2.319	2.321	1.118	1.117	8.739	8.883	27.033	27.045
11.21	11.274	2.922	2.922	6.175	6.223	2.303	2.304	1.344	1.342	8.85	8.995	4.323	4.323
14.795	14.931	3.216	3.215	6.86	6.921	6.649	6.695	1.108	1.106	0.759	0.758	11.095	11.089
17.683	17.823	2.198	2.201	6.675	6.729	5.667	5.703	1.246	1.244	0.768	0.767	11.144	11.138
9.046	9.123	3.198	3.2	6.632	6.685	5.221	5.255	1.046	1.046	0.754	0.753	0.985	0.985
8.067	8.164	3.251	3.253	7.253	7.317	4.837	4.816	0.885	0.884	0.974	0.978	0.234	0.234
8.673	8.79	3.248	3.25	6.705	6.759	4.484	4.464	0.889	0.888	1.877	1.871	3.881	3.883
8.962	9.079	3.261	3.263	5.806	5.851	4.585	4.565	0.901	0.9	2.073	2.069	3.836	3.838
7.791	7.883	10.32	10.197	6.164	6.312	4.375	4.354	0.895	0.894	4.173	4.183	12.63	12.633
7.97	8.065	9.413	9.305	5.751	5.895	7.577	7.61	3.28	3.29	3.605	3.609	21.165	21.167
8.257	8.358	11.037	10.902	5.945	6.095	8.354	8.387	3.208	3.218	0.822	0.828	13.692	13.695
7.071	7.152	8.948	8.848	5.783	5.925	7.981	8.013	3.255	3.265	0.836	0.842	24.176	24.179
20.113	20.454	8.604	8.51	6.954	7.116	32.987	33.032	3.11	3.119	0.728	0.732	13.305	13.307
20.578	20.931	9.292	9.186	4.484	4.599	35.746	35.806	3.359	3.373	0.646	0.65	23.826	23.827
20.104	20.445	9.204	9.098	5.937	6.085	32.938	32.983	2.23	2.227	0.571	0.572	25.909	25.912
19.902	20.238	10.373	10.28	5.594	5.726	38.83	38.907	2.228	2.225	1.407	1.409	29.84	29.84
20.444	20.794	6.443	6.404	5.95	6.102	54.547	54.944	2.145	2.142	1.284	1.284	18.746	18.747
19.576	19.904	4.469	4.459	3.182	3.263	49.754	50.081	2.151	2.148	1.191	1.19	23.736	23.738
5.858	5.929	7.971	7.91	2.723	2.728	54.328	54.726	1.902	1.9	8.077	8.156	23.244	23.245
5.349	5.396	3.983	3.98	2.689	2.693	53.158	53.537	1.168	1.167	7.986	8.064	24.332	24.335
6.205	6.279	11.526	11.419	2.721	2.725	53.359	53.738	0.998	0.997	8.095	8.174	22.453	22.454
6.213	6.287	7.223	7.15	2.805	2.808	7.99	8.093	0.966	0.964	7.773	7.849	24.205	24.208
6.707	6.795	8.76	8.665	2.93	2.932	7.059	7.151	0.94	0.939	1.315	1.315	18.355	18.358
9.528	9.614	8.796	8.7	2.894	2.899	6.598	6.684	0.938	0.937	1.281	1.28	26.935	26.935
9.651	9.739	8.136	8.049	2.853	2.857	9.058	9.176	0.997	0.996	1.252	1.25	28.025	28.025
9.655	9.742	7.429	7.352	2.99	2.991	8.408	8.518	0.944	0.943	1.262	1.26	5.083	5.091
9.467	9.552	7.882	7.8	2.826	2.828	8.127	8.231	1.386	1.385	5.859	5.915	4.582	4.594
14.128	14.464	2.707	2.709	3.022	3.029	6.377	6.461	1.548	1.546	6.021	6.081	5.351	5.361
13.89	14.218	2.774	2.776	1.909	1.91	9.993	10.122	1.479	1.478	6.01	6.069	4.964	4.975
13.324	13.636	2.607	2.61	1.772	1.773	5.62	5.58	1.358	1.357	5.209	5.311	4.958	4.968
14.194	14.532	2.698	2.7	1.964	1.965	5.67	5.629	1.477	1.476	5.305	5.408	5.443	5.451
13.712	14.035	2.735	2.739	1.644	1.645	6.325	6.276	1.481	1.479	3.616	3.581	5.226	5.235
14.107	14.442	6.655	6.666	2.254	2.254	6.325	6.276	1.487	1.485	3.609	3.575	3.634	3.636
2.569	2.598	7.886	7.903	1.7	1.702	8.099	8.126	0.972	0.973	2.94	2.974	3.012	3.009
2.621	2.651	6.914	6.922	1.984	1.985	10.227	10.268	0.986	0.986	2.831	2.866	2.876	2.874
2.581	2.611	6.815	6.828	1.781	1.782	4.533	4.539	0.978	0.978	2.751	2.784	3.015	3.013
2.697	2.728	7.444	7.457	1.731	1.732	4.658	4.667	5.642	5.702	0.696	0.693	3.125	3.123
2.196	2.221	8.369	8.392	1.795	1.797	11.983	12.017	5.518	5.576	0.702	0.699	2.602	2.6
2.918	2.944	2.379	2.383	1.539	1.54	12.343	12.381	5.445	5.501	0.791	0.789	2.699	2.697
2.837	2.86	2.535	2.539	2.322	2.323	9.708	9.753	1.041	1.041	0.789	0.787	3.016	3.014
2.883	2.908	2.639	2.644	1.505	1.506	10.023	10.075	1.05	1.049	1.409	1.431	2.884	2.882
2.849	2.872	5.673	5.689	12.04	12.164	5.843	5.849	1.052	1.052	1.425	1.447	2.802	2.8
2.831	2.854	2.881	2.887	12.332	12.458	5.868	5.875	1.644	1.644	1.106	1.112	1.078	1.077
12.837	13.152	4.774	4.785	12.263	12.389	4.447	4.461	1.593	1.593	1.106	1.113	1.031	1.031
14.567	14.965	4.912	4.923	12.072	12.197	4.239	4.251	1.657	1.656	1.355	1.372	0.976	0.976
14.005	14.377	5.028	5.04	12.006	12.131	12.597	12.677	2.241	2.238	1.696	1.72	1.164	1.164
12.668	12.971	5.243	5.256	12.346	12.473	12.682	12.763	2.275	2.272	1.435	1.453	1.103	1.103
10.346	10.43	4.649	4.659	12.412	12.54	7.998	8.02	2.21	2.208	2.378	2.393	1.119	1.118
10.163	10.248	1.651	1.653	6.877	6.922	8.013	8.035	1.564	1.563	2.396	2.411	1.059	1.058
10.228	10.313	2.356	2.362	6.785	6.824	3.666	3.696	1.443	1.443	1.434	1.45	0.249	0.249
8.945	9.062	1.877	1.881	6.902	6.942	4.408	4.443	1.601	1.6	0.845	0.832	0.256	0.256
8.657	8.771	2.553	2.561	7.015	7.056	4.811	4.846	1.594	1.593	0.836	0.823	0.254	0.254
8.837	8.953	2.106	2.111	6.712	6.749	4.651	4.685	1.466	1.465	0.32	0.316	0.243	0.243
5.435	5.477	1.716	1.719	4.352	4.385	9.173	9.235	1.437	1.436	1.109	1.085	0.262	0.262
5.833	5.88	1.78	1.783	4.659	4.694	8.943	9.003	1.432	1.43	0.579	0.578	0.25	0.249
5.558	5.601	2.696	2.7	4.325	4.358	54.502	54.999	1.619	1.616	0.39	0.384	2.414	2.413
5.638	5.683	2.65	2.654	4.556	4.589	54.735	55.235	1.845	1.841	0.407	0.402	0.751	0.751
11.787	12.036	2.589	2.593	6.51	6.569	56.181	56.688	1.871	1.867	0.216	0.213	0.759	0.759
11.729	11.978	2.629	2.633	6.542	6.602	60.812	61.442	1.993	1.99	0.178	0.178	0.763	0.763
10.389	10.607	2.643	2.647	6.62	6.684	62.251	62.894	0.902	0.902	0.472	0.472	3.369	3.396
6.597	6.713	12.973	12.806	6.627	6.688	53.27	53.85	0.768	0.768	1.42	1.426	3.354	3.38
7.72	7.868	14.001	13.817	51.347	51.857	53.559	54.145	0.855	0.855	1.389	1.394	3.251	3.276
11.382	11.622	14.081	13.897	51.21	51.72	53.715	54.305	0.859	0.858	1.35	1.355	3.271	3.297
9.89	10.095	14.08	13.895	50.705	51.223	48.084	48.622	1.651	1.648	0.985	0.988	15.886	15.88
11.762	12.011	3.729	3.724	52.163	52.667	48.299	48.838	1.753	1.75	1.219	1.225	15.559	15.553
8.153	8.311	3.558	3.554	4.53	4.571	61.366	62.013	1.818	1.815	0.984	0.987	15.589	15.584
8.455	8.604	3.677	3.672	4.41	4.449	61.959	62.61	1.677	1.675	0.514	0.517	15.764	15.758
9.743	9.921	4.155	4.142	4.431	4.471	94.559	95.617	1.877	1.873	0.499	0.503	14.308	14.303
10.71	10.91	2.452	2.456	4.37	4.409	100.539	101.639	1.579	1.577	0.504	0.508	16.54	16.534
9.618	9.793	2.521	2.526	4.147	4.238	68.59	69.373	0.756	0.756	2.358	2.371	1.106	1.106
10.592	10.791	2.486	2.49	3.878	3.957	72.046	72.869	0.756	0.756	2.345	2.358	1.105	1.104
10.143	10.331	2.322	2.326	3.513	3.585	64.12	64.851	1.135	1.134	0.943	0.945	1.132	1.132
8.763	8.92	5.089	5.064	4.05	4.133	61.09	61.769	1.144	1.143	0.839	0.84	1.035	1.034
8.655	8.809	5.233	5.207	3.974	4.063	64.102	64.813	1.101	1.1	2.293	2.321	21.228	21.226
10.994	11.139	5.331	5.303	2.847	2.891	117.037	118.234	1.125	1.123	1.756	1.777	20.807	20.806
8.445	8.554	3.85	3.827	2.8	2.843	116.806	118	1.35	1.349	1.707	1.726	20.036	20.035
14.125	14.314	3.849	3.827	2.865	2.91	62.46	62.998	1.233	1.232	0.849	0.852	20.47	20.469
9.556	9.681	1.219	1.22	2.903	2.939	44.37	44.698	1.34	1.339	0.85	0.854	16.621	16.618
11.066	11.212	1.196	1.197	2.976	3.022	20.169	20.356	1.353	1.352	0.597	0.596	17.077	17.074
13.778	13.962	1.521	1.523	3.007	3.057	21.35	21.546	1.354	1.353	0.606	0.606	16.638	16.635
2.152	2.167	1.511	1.513	3.053	3.115	13.71	13.794	1.352	1.351	0.847	0.847	16.875	16.872
1.947	1.959	5.623	5.62	2.848	2.879	12.45	12.523	1.093	1.091	1.287	1.288	3.115	3.134
1.522	1.531	5.431	5.425	2.948	3	16.926	17.051	1.06	1.058	1.354	1.354	3.025	3.043
1.567	1.576	5.219	5.227	1.505	1.508	16.137	16.254	1.075	1.074	1.309	1.309	3.083	3.102
1.858	1.87	5.261	5.27	1.479	1.482	4.667	4.708	1.077	1.076	0.982	0.982	2.987	3.004
6.367	6.443	1.445	1.446	1.497	1.5	5.422	5.467	1.085	1.084	0.971	0.971	5.008	5.018
5.964	6.032	1.405	1.407	1.502	1.505	17.318	17.455	1.113	1.112	1.138	1.145	5.045	5.056
5.832	5.898	1.73	1.731	1.512	1.516	16.264	16.389	1.105	1.105	1.122	1.129	5.03	5.041
6.074	6.145	2.33	2.333	1.311	1.317	2.213	2.216	1.743	1.742	1.188	1.196	5.117	5.126
6.117	6.186	2.255	2.257	1.33	1.336	1.801	1.803	1.767	1.766	0.877	0.878	5.109	5.119
5.846	5.912	2.203	2.205	1.171	1.178	1.762	1.764	1.101	1.1	0.372	0.372	5.003	5.014
6.816	6.904	2.359	2.362	1.255	1.262	6.946	6.992	1.085	1.084	0.387	0.387	4.686	4.686
6.98	7.07	1.419	1.421	2.032	2.033	6.928	6.973	1.406	1.404	1.347	1.362	4.694	4.694
7.645	7.744	1.466	1.468	20.643	21.049	6.953	6.999	1.397	1.396	1.401	1.417	4.758	4.759
6.967	7.057	1.461	1.463	20.094	20.489	7.134	7.181	1.401	1.4	2.184	2.21	4.611	4.611
6.768	6.855	1.32	1.321	20.17	20.561	6.855	6.9	1.747	1.745	0.892	0.896	5.15	5.151
3.989	4.039	1.566	1.569	20.099	20.488	7.039	7.086	1.745	1.743	1.273	1.287	0.886	0.885
4.342	4.396	1.651	1.654	15.188	15.359	9.59	9.659	0.832	0.832	2.343	2.355	0.882	0.881
4.067	4.119	1.587	1.59	15.298	15.47	9.441	9.503	0.812	0.812	2.275	2.285	3.653	3.692
4.105	4.156	1.699	1.703	13.685	13.83	10.461	10.536	2.963	2.954	2.034	2.045	3.692	3.732
3.98	4.03	0.72	0.721	16.72	16.92	10.749	10.822	1.629	1.628	0.989	0.999	3.716	3.755
4.12	4.172	0.714	0.714	6.783	6.819	10.344	10.413	2.212	2.21	5.332	5.435	3.687	3.726
5.772	5.865	0.372	0.372	4.958	4.995	10.111	10.175	3.237	3.229	1.365	1.352	4.996	5.008
5.811	5.918	2.166	2.17	4.796	4.833	12.907	12.959	3.756	3.747	1.119	1.096	4.967	4.979
5.819	5.911	1.855	1.858	4.246	4.273	13.498	13.563	5.58	5.567	14.874	15.119	4.972	4.984
5.942	6.031	2.137	2.141	3.807	3.833	13.178	13.236	7.721	7.704	0.76	0.759	5.05	5.061
5.81	5.904	2.1	2.105	4.358	4.387	18.346	18.362	4.616	4.605	29.304	29.709	11.694	11.693
5.672	5.771	2.07	2.074	4.008	4.035	18.684	18.703	3.591	3.596	29.036	29.43	11.493	11.492
2.338	2.36	1.649	1.651	6.101	6.152	18.367	18.383	3.628	3.62	29.733	30.13	11.617	11.616
2.383	2.404	2.041	2.044	5.931	5.981	19.561	19.589	8.246	8.258	28.287	28.676	11.745	11.744
2.309	2.331	1.943	1.946	6.339	6.391	18.668	18.687	3.989	3.98	28.997	29.394	10.037	10.025
2.443	2.453	0.917	0.917	6.446	6.499	17.874	17.885	7.356	7.427	28.364	28.757	10.609	10.597
6.157	6.218	0.915	0.915	31.818	32.316	6.25	6.282	1.397	1.395	28.734	29.121	10.276	10.264
6.303	6.365	0.913	0.912	31.079	31.563	8.405	8.441	1.399	1.398	25.896	26.259	10.34	10.328
6.339	6.401	2.682	2.69	32.951	33.477	9.191	9.229	1.629	1.627	16.086	16.284	11.064	11.054
6.314	6.376	2.522	2.529	32.48	32.874	9.594	9.631	1.605	1.604	31.98	32.393	10.079	10.07
6.398	6.461	5.916	5.92	35.032	35.452	3.558	3.592	1.329	1.328	29.154	29.553	10.43	10.421
5.834	5.894	24.359	24.072	35.272	35.694	3.536	3.57	1.976	1.973	27.606	27.984	10.486	10.477
3.106	3.125	13.637	13.505	33.748	34.155	8.121	8.153	1.687	1.685	30.465	30.871	7.406	7.409
3.122	3.141	7.167	7.193	26.436	26.827	25.127	25.325	0.936	0.936	4.206	4.014	7.373	7.376
3.2	3.219	22.32	22.279	26.708	27.097	28.057	28.281	1.283	1.281	4.32	4.145	7.388	7.391
3.032	3.049	14.848	14.816	26.162	26.553	26.11	26.316	1.342	1.341	1.766	1.69	7.543	7.546
2.945	2.961	11.318	11.292	27.386	27.774	6.754	6.799	2.112	2.109	4.504	4.278	7.434	7.437
6.72	6.852	11.637	11.606	26.923	27.313	6.791	6.836	1.086	1.085	4.204	3.998	6.695	6.698
7.011	7.149	18.03	17.99	23.537	23.729	11.15	11.205	0.967	0.966	1.41	1.398	6.957	6.96
7.09	7.229	14.47	14.434	23.576	23.769	11.183	11.24	1.568	1.566	1.449	1.438	6.849	6.851
4.195	4.232	12.673	12.642	23.564	23.76	10.909	10.963	1.146	1.145	1.279	1.262	6.978	6.98
4.085	4.121	14.326	14.293	23.499	23.696	6.779	6.805	2.196	2.191	1.028	1.021	6.697	6.699
4.361	4.399	13.269	13.236	11.091	11.217	6.762	6.788	2.314	2.309	2.496	2.473	3.56	3.557
4.133	4.171	12.471	12.439	11.316	11.445	7.113	7.14	2.414	2.409	3.191	3.171	3.368	3.365
3.156	3.205	16.278	16.236	11.146	11.273	7.362	7.389	2.718	2.712	3.154	3.138	3.39	3.387
3	3.043	6.924	6.904	3.314	3.362	8.449	8.521	2.391	2.385	2.976	2.96	3.313	3.31
2.816	2.854	7.184	7.163	3.218	3.262	8.257	8.329	1.599	1.596	3.249	3.225	3.623	3.648
1.79	1.802	6.096	6.076	3.272	3.321	15.263	15.306	1.488	1.485	3.167	3.145	3.568	3.594
1.795	1.807	5.708	5.69	3.413	3.468	16.069	16.112	1.431	1.428	1.968	1.982	3.612	3.637
1.764	1.772	5.375	5.356	3.323	3.371	15.766	15.808	2.096	2.092	1.893	1.907	3.629	3.654
1.628	1.635	6.049	6.027	17.419	17.734	18.777	18.776	2.148	2.144	2.263	2.279	5.269	5.279
1.691	1.698	11.382	11.352	16.349	16.649	19.338	19.337	1.869	1.865	2.074	2.089	5.153	5.163
4.89	4.923	4.145	4.136	15.911	16.2	18.259	18.258	1.935	1.932	1.992	2.007	5.336	5.345
4.51	4.539	3.084	3.077	16.439	16.738	9.131	9.174	1.354	1.352	1.842	1.855	5.577	5.586
4.993	5.027	1.651	1.649	15.862	16.187	8.598	8.638	1.329	1.327	1.873	1.884	5.48	5.489
3.116	3.137	15.329	15.337	16.444	16.774	9.088	9.129	1.319	1.317	26.329	26.684	0.195	0.194
3.11	3.131	15.67	15.678	16.53	16.862	8.183	8.217	1.34	1.338	25.379	25.725	0.21	0.21
1.286	1.296	18.358	18.375	15.565	15.888	8.677	8.718	6.108	6.094	27.801	28.18	0.216	0.215
1.152	1.161	16.549	16.56	4.661	4.758	0.8	0.801	5.917	5.904	28.717	29.114	0.259	0.259
0.986	0.993	17.02	17.033	4.272	4.355	0.802	0.803	6.206	6.193	4.584	4.621	0.258	0.257
3.345	3.385	20.383	20.404	5.193	5.308	0.791	0.792	5.626	5.613	4.863	4.902	0.847	0.846
2.943	2.977	15.883	15.886	5.269	5.486	0.853	0.854	5.141	5.129	8.876	8.964	0.851	0.85
3.765	3.771	16.122	16.131	5.048	5.254	1.555	1.56	2.914	2.914	9.902	10.002	0.84	0.839
3.832	3.838	19.213	19.233	5.319	5.541	1.6	1.605	3.043	3.043	1.083	1.083	0.842	0.842
3.263	3.269	17.622	17.638	5.249	5.465	1.644	1.649	3.077	3.077	1.122	1.122	0.844	0.844
0.579	0.581	3.77	3.783	7.126	7.414	1.595	1.6	2.222	2.219	1.114	1.115	1.229	1.229
0.571	0.573	3.826	3.839	7.222	7.506	0.871	0.872	1.275	1.273	1.141	1.142	1.281	1.28
0.868	0.866	2.428	2.436	5.647	5.778	0.869	0.87	1.082	1.081	3.86	3.915	1.326	1.325
0.878	0.877	3.551	3.563	6.026	6.172	0.855	0.857	1.134	1.133	3.606	3.657	1.296	1.296
0.888	0.887	3.321	3.332	2.973	3.043	0.84	0.84	1.142	1.14	3.934	3.992	1.474	1.473
0.477	0.478	3.475	3.486	2.955	3.024	2.913	2.928	1.122	1.121	3.881	3.937	2.457	2.456
0.475	0.476	3.358	3.369	3.021	3.093	3.043	3.058	1.399	1.397	3.702	3.755	2.474	2.473
7.716	7.816	3.442	3.453	2.985	3.054	3.093	3.108	1.489	1.487	3.787	3.837	2.556	2.555
17.586	17.766	3.594	3.606	17.598	18.289	9.327	9.434	1.447	1.445	4.046	4.105	2.498	2.497
12.611	12.701	3.387	3.398	18.337	19.088	12.958	13.105	1.341	1.339	4.012	4.07	1.589	1.588
11.107	11.207	2.703	2.711	18.323	19.057	13.877	14.034	1.285	1.284	15.673	15.845	1.584	1.583
8.166	8.265	3.473	3.485	1.486	1.489	14.884	15.052	1.524	1.522	16.323	16.505	1.832	1.832
6.737	6.867	2.632	2.632	1.505	1.508	12.464	12.606	1.226	1.225	17.375	17.572	1.807	1.807
3.881	3.915	2.661	2.662	1.172	1.173	1.26	1.266	1.389	1.387	18.107	18.317	3.672	3.67
1.798	1.81	2.624	2.624	1.191	1.192	1.553	1.562	0.96	0.96	1.013	1.011	3.526	3.524
13.617	13.97	2.597	2.597	1.179	1.18	1.524	1.533	0.95	0.949	1.025	1.023	1.389	1.388
11.244	11.346	2.672	2.669	1.169	1.17	1.531	1.54	0.955	0.954	1.013	1.011	1.57	1.569
6.063	6.132	2.7	2.698	1.175	1.176	1.505	1.514	0.965	0.964	1.125	1.135	0.507	0.507
3.925	3.974	2.693	2.691	1.18	1.181	4.181	4.212	0.96	0.959	2.768	2.74	0.495	0.495
11.126	11.239	2.648	2.646	1.156	1.156	3.755	3.783	2.905	2.911	3.143	3.128	1.133	1.132
2.911	2.944	2.943	2.946	1.165	1.165	3.486	3.512	2.824	2.829	5.414	5.439	1.134	1.133
3.968	3.974	3.037	3.04	1.161	1.162	3.417	3.442	2.881	2.887	4.736	4.751	0.339	0.339
14.621	14.762	2.382	2.383	1.129	1.129	3.319	3.343	2.756	2.762	1.347	1.351	0.338	0.338
2.469	2.479	2.373	2.37	1.134	1.135	5.271	5.315	3.053	3.064	1.361	1.364	0.33	0.33
3.117	3.138	2.404	2.402	2.144	2.149	6.003	6.056	2.222	2.219	1.3	1.302	0.333	0.333
2.619	2.65	2.406	2.403	2.1	2.104	5.815	5.866	2.215	2.212	0.907	0.91	0.33	0.33
11.669	11.916	2.409	2.407	2.042	2.046	5.751	5.801	2.137	2.133	1.175	1.175	0.386	0.386
13.145	13.506	4.746	4.746	2.182	2.187	5.515	5.562	2.103	2.1	1.271	1.274	0.388	0.388
4.108	4.158	4.431	4.432	2.077	2.081	1.835	1.834	1.9	1.897	1.177	1.179	0.763	0.763
10.183	10.422	4.999	4.998	0.899	0.901	1.814	1.813	1.279	1.278	1.11	1.112	0.762	0.762
13.407	13.771	4.303	4.304	0.868	0.87	1.796	1.795	1.232	1.23	2.72	2.751	0.62	0.62
9.251	9.453	4.188	4.189	0.866	0.868	1.775	1.774	1.173	1.172	2.496	2.523	0.562	0.562
10.31	10.567	4.378	4.38	0.903	0.904	1.772	1.771	1.128	1.127	2.572	2.601	0.574	0.574
8.606	8.799	4.046	4.048	0.893	0.895	1.858	1.867	1.124	1.123	2.433	2.459	0.557	0.557
5.826	5.907	19.281	19.242	1.064	1.064	1.805	1.814	1.23	1.229	1.73	1.741	0.557	0.557
3.412	3.443	21.202	21.173	1.159	1.158	1.838	1.846	1.124	1.123	1.662	1.671	0.38	0.38
4.708	4.767	16.546	16.519	1.073	1.073	1.909	1.919	1.781	1.78	1.661	1.67	0.383	0.383
7.718	7.87	17.191	17.158	1.171	1.171	1.783	1.795	2.192	2.189	1.649	1.658	0.91	0.909
10.489	10.768	18.01	17.985	1.202	1.201	1.78	1.791	2.175	2.173	2.786	2.815	0.936	0.936
15.354	15.709	21.34	21.294	1.403	1.401	1.752	1.763	2.144	2.142	3.175	3.211	0.59	0.59
15.287	15.663	3.993	3.989	1.374	1.373	1.765	1.777	2.274	2.272	3.297	3.334	0.607	0.607
15.056	15.427	4.181	4.177	1.355	1.354	1.789	1.801	2.28	2.278	4.286	4.331	0.461	0.461
15.722	16.093	3.906	3.903	1.374	1.373	5.513	5.562	2.239	2.237	3.864	3.904	0.463	0.463
16.114	16.496	3.761	3.759	1.283	1.282	5.722	5.769	0.808	0.807	1.59	1.54	0.35	0.35
15.568	15.93	3.578	3.576	1.485	1.487	5.76	5.807	0.813	0.812	1.588	1.539	0.35	0.35
14.928	15.318	4.222	4.218	1.485	1.487	5.693	5.74	0.809	0.808	1.492	1.506	0.16	0.16
16.849	17.27	2.749	2.748	1.463	1.465	5.719	5.766	6.859	6.918	1.519	1.528	0.159	0.159
17.199	17.634	2.262	2.26	1.576	1.579	7.546	7.617	6.724	6.782	1.49	1.502	0.174	0.174
29.501	30.445	2.692	2.693	1.484	1.486	7.941	8.016	6.736	6.794	0.833	0.825	0.174	0.174
14.399	14.753	2.768	2.768	1.532	1.532	8.397	8.477	1.087	1.087	0.846	0.838	0.175	0.175
21.335	21.963	3.312	3.312	1.535	1.535	8.831	8.916	1.105	1.105	0.73	0.731	0.172	0.172
29.749	30.67	9.459	9.483	1.531	1.531	3.573	3.575	1.104	1.104	0.745	0.746	0.223	0.223
10.421	10.631	9.14	9.162	5.642	5.773	107.049	108.178	2.499	2.507	1.645	1.661	0.225	0.225
10.131	10.342	10.061	10.081	5.243	5.459	123.744	125.077	2.373	2.381	1.659	1.675	0.464	0.464
10.021	10.217	9.153	9.178	6.005	6.055	42.635	42.953	2.495	2.501	1.122	1.131	0.463	0.463
12.533	12.819	9.501	9.522	12.243	12.369	53.38	53.827	2.09	2.088	1.122	1.131	0.383	0.383
9.22	9.401	8.098	8.12	4.497	4.537	36.931	37.275	2.139	2.136	1.214	1.217	0.382	0.382
9.59	9.777	2.464	2.472	3.798	3.826	10.087	10.16	2.107	2.105	1.459	1.465	1.102	1.101
10.496	10.715	2.532	2.54	30.996	31.478	6.658	6.702	1.745	1.744	1.27	1.274	5.443	5.451
7.249	7.382	2.574	2.582	1.51	1.514	6.785	6.717	1.648	1.647	0.532	0.527	1.42	1.42
23.052	23.529	4.775	4.791	1.486	1.489	6.858	6.789	1.809	1.807	0.538	0.533	0.758	0.758
23.241	23.723	2.688	2.696	1.503	1.506	5.909	5.922	1.757	1.756	0.854	0.861	0.763	0.763
22.935	23.409	1.434	1.437	7.008	7.048	35.832	36.158	1.215	1.213	0.83	0.808	7.499	7.502
22.552	23.014	1.485	1.489	4.252	4.284	15.999	16.042	1.203	1.201	0.811	0.79	3.558	3.584
23.067	23.544	1.554	1.558	3.154	3.199	2.161	2.164	1.199	1.198	0.199	0.197	3.602	3.627
22.654	23.121	1.562	1.566	5.675	5.809	33.476	33.778	1.31	1.308	0.996	0.973	22.521	22.523
3.137	3.135	1.344	1.347	6.507	6.568	4.549	4.593	1.504	1.501	0.728	0.729	18.82	18.822
3.973	3.968	8.358	8.388	9.376	9.559	5.912	5.935	1.481	1.479	0.239	0.235	27.625	27.625
3.809	3.805	2.697	2.706	9.401	9.589	84.396	85.235	1.451	1.448	0.548	0.545	17.205	17.202
3.779	3.776	2.88	2.889	9.075	9.258	2.167	2.18	1.213	1.212	0.183	0.183	16.562	16.559
3.615	3.613	2.841	2.85	11.057	11.314	95	96.058	0.974	0.974	0.155	0.155	0.549	0.549
7.997	8.208	3.158	3.168	9.313	9.491	88.698	89.698	1.081	1.081	0.433	0.434	0.244	0.244
7.917	8.123	2.147	2.148	9.228	9.403	4.408	4.439	1.121	1.121	1.45	1.454	2.458	2.457
7.937	8.143	2.111	2.112	11.219	11.466	13.563	13.616	1.898	1.894	1.411	1.414	2.526	2.524
7.98	8.19	5.354	5.361	9.631	9.82	12.682	12.726	1.938	1.935	1.354	1.357	2.474	2.472
10.863	11.075	5.543	5.549	9.362	9.57	1.972	1.982	2.015	2.011	1.035	1.036	2.483	2.481
10.674	10.884	5.868	5.873	40.64	40.999	2.604	2.621	1.826	1.823	0.818	0.82	0.224	0.224
10.507	10.715	5.657	5.662	38.715	39.078	105.854	107.014	2.112	2.108	1.048	1.05	23.423	23.425
10.854	11.066	5.546	5.552	39.997	40.356	4.455	4.435	1.763	1.76	0.524	0.524	4.599	4.613
10.68	10.89	5.46	5.457	38.668	39.03	9.294	9.386	0.739	0.739	0.567	0.568	10.36	10.351
10.818	11.029	5.983	5.978	45.275	45.633	7.903	7.941	0.736	0.736	0.554	0.555	10.558	10.548
5.148	5.243	5.961	5.957	29.764	30.131	11.278	11.362	1.357	1.355	1.668	1.67	1.078	1.077
5.211	5.307	5.98	5.976	39.795	40.155	6.344	6.272	1.354	1.353	1.677	1.68	0.348	0.348
5.153	5.248	31.959	31.965	36.433	36.788	6.378	6.304	1.36	1.358	1.243	1.246	3.611	3.637
5.314	5.412	30.653	30.659	40.178	40.536	7.62	7.648	1.361	1.359	1.035	1.036	3.58	3.606
4.5	4.582	31.578	31.583	19.006	19.348	4.704	4.696	1.435	1.433	1.969	1.978	18.166	18.153
2.393	2.409	28.554	28.553	5.28	5.345	109.67	110.834	1.278	1.278	1.771	1.781	23.316	23.292
2.495	2.512	3.392	3.396	5.113	5.172	9.171	9.209	1.424	1.423	1.738	1.748	20.6	20.585
2.424	2.439	3.712	3.715	4.961	5.016	6.958	6.886	1.381	1.381	1.071	1.071	32.594	32.568
2.574	2.593	3.568	3.572	4.81	4.857	65.764	66.062	1.384	1.383	1.075	1.074	13.502	13.488
2.533	2.551	2.857	2.861	4.281	4.309	66.644	66.998	1.461	1.461	0.516	0.514	23.928	23.9
13.237	13.637	8.888	8.892	6.034	6.117	64.004	64.361	1.259	1.257	0.525	0.524	31.509	31.482
13.895	14.312	9.229	9.233	4.907	4.957	64.445	64.732	1.228	1.226	0.949	0.947	24.74	24.709
13.593	14.002	9.583	9.589	4.069	4.088	64.327	64.7	1.242	1.24	1.612	1.611	17.82	17.795
13.436	13.843	8.559	8.56	4.213	4.241	57.333	57.417	1.248	1.246	1.729	1.73	27.375	27.349
4.336	4.371	8.634	8.635	7.106	7.219	65.885	66.203	1.296	1.295	1.604	1.603	23.187	23.16
4.417	4.452	1.823	1.822	2.55	2.56	50.113	50.404	1.403	1.401	0.84	0.837	32.679	32.652
4.405	4.44	1.848	1.848	2.384	2.394	66.177	66.545	1.356	1.355	0.846	0.843	21.172	21.144
4.455	4.488	3.089	3.091	2.635	2.645	62.483	62.846	1.587	1.585	1.514	1.517	31.787	31.76
4.374	4.406	3.075	3.077	2.214	2.223	38.322	38.187	1.624	1.622	1.571	1.576	24.909	24.889
4.422	4.455	11.893	11.926	2.984	2.995	34.94	34.832	1.007	1.006	1.432	1.434	20.853	20.821
7.567	7.72	11.375	11.409	2.32	2.33	37.857	37.735	0.998	0.997	1.165	1.165	21.466	21.433
7.596	7.757	7.941	7.967	2.662	2.673	39.459	39.378	1.175	1.174	0.815	0.814	10.598	10.589
7.732	7.888	7.801	7.826	2.446	2.457	43.107	43.011	1.148	1.146	0.836	0.836	7.32	7.315
7.49	7.647	1.065	1.065	2.364	2.374	39.645	39.516	1.16	1.159	1.925	1.942	9.874	9.866
7.422	7.547	1.057	1.057	2.442	2.452	25.847	25.795	1.682	1.679	1.996	2.015	8.59	8.584
7.347	7.471	1.123	1.123	2.158	2.168	34.411	34.349	1.658	1.656	2.063	2.073	9.199	9.192
6.919	7.038	1.053	1.055	3.038	3.048	47.376	47.227	0.793	0.793	1.097	1.106	10.769	10.76
6.003	6.11	1.026	1.027	2.437	2.449	37.013	36.972	0.778	0.778	0.696	0.699	9.978	9.97
5.577	5.666	1.006	1.008	29.418	29.884	51.266	51.232	4.982	4.971	3.171	3.157	9.133	9.12
7.173	7.293	1.063	1.065	29.713	30.18	46.177	46.129	2.429	2.434	3.201	3.18	6.188	6.182
6.332	6.435	0.874	0.874	29.631	30.101	49.074	49.018	2.108	2.106	3.077	3.058	5.691	5.685
7.319	7.442	0.913	0.914	29.368	29.847	48.292	48.258	24.41	24.355	0.899	0.903	6.349	6.343
6.713	6.835	0.906	0.907	29.257	29.742	37.289	37.235	23.601	23.548	3.836	3.876	6.403	6.396
5.212	5.3	0.794	0.794	29.664	30.129	57.101	57.075	25.208	25.15	1.413	1.402	4.495	4.491
5.64	5.74	1.026	1.027	29.765	30.233	58.588	58.532	31.139	31.066	1.053	1.03	4.957	4.953
6.032	6.144	1.085	1.086	4.684	4.755	82.075	82.02	16.154	16.117	23.784	24.106	6.17	6.164
5.447	5.543	1.037	1.038	5.378	5.478	81.382	81.29	38.739	38.639	1.014	1.012	5.697	5.691
6.205	6.322	1.119	1.12	5.353	5.45	79.74	79.646	24.206	24.152	20.052	19.607	5.414	5.408
5.888	5.995	0.673	0.673	5.351	5.447	83.586	83.529	37.522	37.434	14.875	14.562	0.873	0.873
4.952	5.035	0.668	0.668	5.542	5.649	78.064	77.952	24.67	24.615	11.983	11.745	0.85	0.849
5.373	5.466	0.654	0.654	5.732	5.794	7.885	7.924	48.813	48.696	16.673	16.315	0.801	0.8
10.747	10.895	1.187	1.188	5.926	5.989	8.085	8.126	1.555	1.554	16.905	16.541	0.921	0.921
9.753	9.894	1.172	1.174	5.739	5.8	6.977	7.009	1.568	1.566	18.545	18.139	0.887	0.887
11.909	12.066	1.183	1.185	5.802	5.866	7.113	7.148	1.882	1.881	17.876	17.491	0.897	0.896
10.212	10.356	1.191	1.193	5.758	5.886	25.471	25.586	1.757	1.756	16.141	15.799	0.859	0.859
10.763	10.911	1.112	1.114	6.125	6.266	21.906	21.994	1.64	1.638	4.668	4.643	0.237	0.237
11.464	11.614	1.163	1.164	7.214	7.394	27.95	28.09	3.143	3.137	8.824	8.672	0.244	0.244
2.697	2.715	1.23	1.232	5.858	5.989	20.722	20.802	1.91	1.909	20.356	19.905	0.239	0.239
2.679	2.698	1.313	1.315	19.808	20.043	26.086	26.212	1.154	1.154	14.317	14.018	0.234	0.234
1.65	1.66	1.154	1.154	19.327	19.555	24.596	24.711	1.752	1.75	12.595	12.343	0.237	0.237
1.716	1.727	1.149	1.149	19.981	20.22	19.08	19.142	1.721	1.719	4.888	4.924	0.233	0.233
2.45	2.467	1.142	1.142	21.823	22.082	40.691	40.307	3.161	3.156	5.31	5.353	3.339	3.336
8.497	8.645	1.118	1.119	12.901	13.087	40.342	39.955	1.13	1.13	2.404	2.418	0.641	0.641
7.782	7.914	1.135	1.136	12.789	12.977	43.526	43.104	0.939	0.939	4.402	4.436	0.646	0.646
7.563	7.692	10.19	10.213	12.891	13.08	40.092	39.71	1.839	1.836	4.497	4.529	0.644	0.644
7.986	8.124	10.079	10.054	12.755	12.944	38.107	37.872	1.577	1.576	2.048	2.068	2.457	2.462
8.029	8.165	20.077	20.034	4.786	4.81	52.763	52.451	14.155	14.125	2.132	2.154	2.449	2.453
7.578	7.707	3.5	3.511	5.43	5.46	45.847	45.57	16.686	16.65	1.715	1.73	2.405	2.408
3.613	3.664	9.02	9.049	5.658	5.686	35.932	35.691	18.283	18.243	2.49	2.504	2.416	2.42
3.717	3.769	7.628	7.65	5.329	5.36	56.056	55.749	6.825	6.811	2.347	2.368	10.986	10.966
3.803	3.856	7.087	7.105	4.569	4.59	55.601	55.299	6.433	6.421	3.557	3.595	10.725	10.706
3.745	3.797	7.922	7.943	8.793	8.823	37.89	37.621	5.305	5.295	3.525	3.564	10.734	10.714
3.684	3.735	8.279	8.304	8.759	8.788	56.142	55.84	7.896	7.881	3.242	3.277	10.931	10.911
3.282	3.319	8.323	8.346	8.802	8.832	40.532	40.179	7.797	7.782	3.521	3.559	9.576	9.559
3.461	3.502	7.698	7.719	9.6	9.785	41.048	40.683	3.354	3.347	3.407	3.444	11.74	11.719
3.297	3.335	7.775	7.796	9.862	10.043	45.66	45.287	3.433	3.426	4.118	4.12	1.608	1.607
3.331	3.369	8.032	8.054	9.888	10.072	42.366	42.014	2.497	2.492	4.069	4.072	1.569	1.568
3.264	3.301	7.954	7.976	10.166	10.35	33.919	33.586	2.512	2.507	4.49	4.49	1.605	1.604
3.304	3.342	9.777	9.805	9.468	9.639	49.401	48.968	3.574	3.569	4.267	4.268	1.563	1.562
4.362	4.421	4.587	4.587	9.65	9.841	49.963	49.599	3.422	3.418	4.202	4.204	16.694	16.659
3.756	3.802	4.507	4.506	7.114	7.222	48.005	47.569	3.293	3.289	3.719	3.722	16.416	16.381
4.517	4.579	4.098	4.097	6.857	6.962	49.693	49.224	3.488	3.483	3.604	3.601	15.919	15.885
4.845	4.913	4.42	4.42	7.321	7.432	33.132	32.822	18.266	18.234	19.62	19.186	16.189	16.154
4.352	4.41	4.313	4.312	7.347	7.459	36.544	36.232	17.614	17.581	20.219	19.763	14.23	14.211
3.872	3.921	3.683	3.682	7.966	8.079	48.014	47.723	18.936	18.901	20.762	20.298	14.578	14.557
1.909	1.922	2.828	2.826	4.591	4.626	35.406	35.098	16.147	16.118	21.743	21.253	14.231	14.211
1.946	1.959	3.946	3.946	4.487	4.52	8.983	9.005	13.961	13.933	2.374	2.374	14.355	14.334
1.941	1.955	4.02	4.021	5.722	5.784	9.12	9.139	5.475	5.481	2.472	2.472	2.821	2.821
1.843	1.85	3.698	3.698	4.721	4.762	9.07	9.091	5.958	5.964	3.786	3.766	2.851	2.851
8.179	8.429	21.496	21.57	2.823	2.835	9.176	9.181	5.964	5.971	4.1	4.074	2.853	2.853
8.644	8.911	23.087	23.166	14.917	15.003	8.972	8.995	3.902	3.898	1.142	1.142	2.926	2.926
8.756	9.026	25.077	25.158	14.689	14.774	9.297	9.282	1.816	1.814	1.182	1.182	5.07	5.076
8.674	8.941	21.527	21.599	14.926	15.012	9.592	9.575	3.014	3.012	1.178	1.178	5.118	5.124
10.184	10.508	22.845	22.921	14.921	15.008	9.928	9.908	3.692	3.689	1.199	1.199	5.163	5.169
7.146	7.361	17.596	17.647	13.223	13.302	9.726	9.709	3.888	3.883	6.203	6.256	5.173	5.179
4.344	4.385	14.999	15.035	13.244	13.323	9.366	9.411	3.636	3.633	5.782	5.833	5.107	5.112
4.333	4.373	16.882	16.938	13.325	13.406	9.328	9.373	2.458	2.456	6.367	6.422	5.184	5.19
4.503	4.544	26.56	26.644	12.876	12.953	9.401	9.446	2.596	2.594	6.267	6.321	3.63	3.627
4.336	4.376	27.441	27.531	4.949	5.029	9.306	9.352	2.535	2.533	5.874	5.925	3.62	3.617
4.149	4.187	2.515	2.519	3.709	3.758	31.021	31.268	2.402	2.401	5.312	5.335	3.7	3.696
4.247	4.308	2.556	2.56	3.631	3.679	14.996	15.119	2.356	2.355	6.558	6.614	3.654	3.65
4.49	4.555	1.586	1.589	3.91	3.957	2.732	2.75	2.637	2.634	6.392	6.445	3.514	3.51
4.645	4.714	2.461	2.466	3.723	3.773	35.551	35.825	2.189	2.187	4.517	4.491	1.162	1.161
11.496	11.683	2.505	2.511	4.453	4.515	22.803	22.987	2.405	2.403	4.615	4.584	1.226	1.225
11.951	12.15	2.497	2.502	3.788	3.836	30.572	30.816	1.23	1.229	4.867	4.828	2.2	2.224
10.936	11.107	2.475	2.48	3.815	3.843	26.682	26.888	0.993	0.992	5.122	5.078	2.262	2.287
11.894	12.095	2.463	2.468	3.752	3.782	21.535	21.699	0.998	0.997	0.936	0.942	2.287	2.312
1.913	1.93	2.489	2.493	3.875	3.902	30.497	30.695	1.009	1.008	0.933	0.939	2.248	2.272
1.873	1.888	2.291	2.296	3.903	3.93	33.471	33.737	1.003	1.002	0.938	0.944	4.269	4.272
1.782	1.796	1.958	1.961	9.545	9.649	17.567	17.71	1.983	1.982	0.918	0.921	4.226	4.228
4.494	4.573	2.41	2.415	9.731	9.84	36.098	36.297	1.929	1.927	3.195	3.221	4.264	4.267
4.414	4.49	6.766	6.77	10.034	10.148	46.091	46.412	1.97	1.968	3.613	3.636	4.272	4.272
3.188	3.2	7.607	7.613	9.796	9.872	37.633	37.854	1.93	1.929	4.89	4.924	11.12	11.112
2.974	2.985	6.853	6.858	9.644	9.721	43.771	44.057	2.344	2.346	4.505	4.534	10.976	10.969
3.134	3.146	7.038	7.043	9.63	9.708	47.604	47.925	1.452	1.451	1.534	1.539	11.059	11.052
5.706	5.739	2.091	2.092	9.72	9.797	44.314	44.603	1.458	1.456	1.558	1.563	11.15	11.142
5.638	5.668	1.829	1.829	20.537	20.701	44.742	45.044	1.426	1.425	1.407	1.41	13.635	13.61
5.591	5.625	2.041	2.041	20.921	21.093	8.589	8.642	1.424	1.423	1.679	1.676	14.865	14.839
1.841	1.853	2.077	2.078	20.362	20.526	10.53	10.596	1.3	1.298	1.121	1.122	14.588	14.562
1.757	1.769	15.08	15.093	21.336	21.509	13.944	14.035	0.917	0.917	1.205	1.208	14.633	14.607
2.139	2.16	15.899	15.918	20.82	20.983	9.502	9.562	2.994	2.991	1.098	1.101	17.44	17.417
1.83	1.846	11.591	11.592	15.259	15.235	25.222	25.426	2.722	2.719	1.023	1.025	16.874	16.852
1.59	1.603	4.421	4.411	15.281	15.256	18.974	19.133	2.522	2.52	1.868	1.877	16.991	16.969
2.104	2.128	4.517	4.506	15.436	15.419	19.934	20.099	2.5	2.498	2.029	2.038	16.902	16.88
1.947	1.968	4.449	4.439	15.436	15.422	9.462	9.51	2.993	2.99	1.985	1.994	11.437	11.44
6.14	6.161	4.548	4.536	11.385	11.463	9.704	9.754	2.453	2.451	2.033	2.043	12.159	12.161
6.096	6.117	6.5	6.51	11.396	11.474	9.6	9.649	2.121	2.119	1.57	1.572	12.081	12.083
5.386	5.404	6.222	6.231	11.33	11.408	34.723	34.837	2.555	2.552	1.517	1.518	12.069	12.072
0.626	0.63	6.773	6.785	17.769	18.009	41.871	42.046	2.555	2.552	1.514	1.515	12.259	12.262
0.628	0.632	6.563	6.572	17.267	17.509	18.135	18.277	2.552	2.548	1.514	1.514	7.637	7.667
2.204	2.179	6.513	6.522	17.623	17.865	17.652	17.787	2.785	2.782	2.042	2.053	7.57	7.596
2.241	2.215	6.035	6.043	18.16	18.403	18.559	18.704	2.768	2.764	2.031	2.041	7.524	7.548
2.275	2.248	3.973	3.976	17.856	18.097	22.129	22.152	2.617	2.614	2.036	2.046	7.545	7.568
0.814	0.815	7.904	7.929	3.81	3.839	15.206	15.221	0.814	0.814	0.988	0.995	7.479	7.5
0.813	0.814	8.568	8.594	5.465	5.508	19.978	19.99	0.817	0.817	0.997	1.003	4.281	4.274
3.804	3.858	6.617	6.637	5.278	5.32	5.197	5.236	0.815	0.815	1.454	1.463	4.05	4.043
29.305	30.211	7.086	7.107	4.886	4.925	5.492	5.533	18.325	18.372	1.452	1.462	4.095	4.088
17.617	18.084	7.16	7.182	13.75	13.851	5.403	5.443	17.673	17.72	2.013	2.033	3.987	3.98
15.507	15.866	8.596	8.624	13.467	13.567	3.274	3.294	17.438	17.485	2.454	2.474	4.551	4.582
10.166	10.373	2.563	2.567	14.187	14.294	3.39	3.411	3.688	3.685	2.124	2.144	4.355	4.386
4.479	4.545	2.923	2.929	14.546	14.654	3.386	3.407	3.644	3.641	0.991	0.994	4.494	4.525
12.585	12.801	2.783	2.788	25.508	25.708	2.186	2.196	3.674	3.671	0.976	0.98	4.567	4.598
4.392	4.468	2.603	2.608	23.265	23.479	2.257	2.268	22.975	22.924	0.714	0.713	7.08	7.077
13.464	13.869	2.402	2.406	28.951	29.153	1.991	1.999	20.926	20.88	0.721	0.72	6.902	6.9
15.833	16.203	2.788	2.793	9.152	9.184	9.68	9.727	26.252	26.19	2.252	2.276	7.286	7.283
7.947	8.082	5.006	4.998	9.03	9.06	14.096	14.157	1.358	1.357	2.267	2.29	7.691	7.688
3.248	3.285	4.562	4.553	9.359	9.392	13.703	13.76	1.361	1.36	1.089	1.094	7.562	7.559
15.371	15.747	5.886	5.878	9.086	9.118	11.886	11.931	1.335	1.333	1.09	1.095	0.242	0.242
1.936	1.957	5.137	5.129	13.295	13.397	13.485	13.542	1.053	1.052	1.907	1.912	0.248	0.248
6.262	6.284	5.388	5.38	15.129	15.235	15.195	15.249	0.976	0.976	2.178	2.183	0.251	0.25
20.931	21.546	8.416	8.441	30.941	31.09	13.935	13.999	1.049	1.049	1.971	1.976	0.433	0.433
1.845	1.852	8.44	8.464	32.765	32.88	13.021	13.084	1.071	1.071	1.092	1.101	0.43	0.43
1.693	1.704	9.563	9.59	11.729	11.942	11.55	11.607	2.116	2.114	1.088	1.096	1.741	1.741
5.202	5.298	8.02	8.044	11.763	11.976	9.804	9.845	2.009	2.007	1.011	1.018	1.958	1.958
7.32	7.444	8.885	8.91	12.043	12.26	4.66	4.672	1.986	1.984	4.45	4.459	1.836	1.836
9.756	9.957	7.424	7.445	12.081	12.3	4.812	4.824	1.644	1.641	4.425	4.434	1.869	1.868
3.523	3.578	1.139	1.139	10.693	10.745	3.852	3.86	1.873	1.87	1.691	1.701	1.88	1.879
8.003	8.148	1.196	1.197	10.68	10.731	3.11	3.118	1.85	1.847	1.392	1.401	3.249	3.247
9.894	10.091	1.241	1.242	10.726	10.778	3.177	3.184	1.828	1.825	2.723	2.743	3.416	3.413
7.473	7.603	1.918	1.921	3.788	3.804	3.954	3.963	1.918	1.917	1.025	1.03	3.563	3.56
8.054	8.213	1.319	1.319	3.713	3.727	2.173	2.175	1.937	1.937	0.519	0.516	3.466	3.463
7.045	7.179	1.351	1.354	1.318	1.32	3.36	3.362	1.934	1.934	0.231	0.231	3.288	3.285
4.795	4.854	1.418	1.422	1.332	1.334	2.667	2.668	1.948	1.948	0.169	0.169	3.072	3.069
3.097	3.13	1.461	1.465	1.311	1.313	1.997	2.008	2.468	2.465	0.441	0.442	3.025	3.022
4.315	4.385	1.606	1.61	1.295	1.298	1.989	2	2.552	2.549	2.873	2.901	3.015	3.012
6.801	6.922	1.298	1.3	1.306	1.308	1.736	1.744	2.669	2.667	2.833	2.86	2.933	2.93
7.683	7.843	3.439	3.417	1.314	1.316	2.063	2.075	2.384	2.382	2.784	2.81	2.782	2.78
7.884	7.946	1.907	1.91	1.375	1.377	1.898	1.907	2.816	2.813	1.029	1.036	2.76	2.759
7.725	7.789	1.591	1.591	1.374	1.376	2.079	2.091	2.285	2.283	1.734	1.747	1.418	1.415
7.708	7.773	2.14	2.144	1.375	1.377	1.543	1.549	0.778	0.778	1.554	1.568	1.423	1.42
7.972	8.035	1.971	1.973	1.337	1.339	2.163	2.176	0.808	0.807	1.386	1.396	2.855	2.852
7.944	8.006	2.813	2.814	1.34	1.342	2.06	2.071	1.032	1.031	1.47	1.482	2.819	2.816
7.865	7.926	2.822	2.824	5.915	6.022	33.364	33.454	1.035	1.034	1.422	1.433	1.237	1.236
7.396	7.461	7.029	7.036	5.958	6.064	32.408	32.486	1.016	1.015	1.322	1.321	1.281	1.28
7.597	7.656	7.833	7.839	5.949	6.055	33.584	33.664	1.03	1.029	1.321	1.32	0.538	0.538
7.487	7.544	9.095	9.102	5.992	6.099	35.017	35.092	2.14	2.138	1.337	1.342	0.525	0.525
2.505	2.508	8.378	8.384	5.917	6.023	34.522	34.598	1.823	1.823	1.113	1.117	0.783	0.782
2.86	2.871	7.532	7.539	0.868	0.87	32.069	32.151	2.115	2.114	4.326	4.304	0.758	0.757
5.833	5.875	6.258	6.269	0.828	0.831	34.16	34.24	1.762	1.762	3.345	3.347	0.249	0.248
2.827	2.836	7.044	7.058	0.827	0.829	24.715	24.812	1.768	1.768	3.266	3.268	0.25	0.25
5.656	5.697	6.976	6.989	0.863	0.865	37.349	37.786	2.093	2.093	1.019	1.016	0.245	0.245
11.389	11.558	7.017	7.031	0.852	0.855	40.568	40.858	1.516	1.514	1.019	1.016	0.394	0.394
11.538	11.701	17.29	17.349	1.138	1.137	35.134	35.366	1.464	1.463	0.481	0.478	0.396	0.396
12.759	12.956	17.429	17.488	1.345	1.344	33.091	33.33	1.486	1.484	0.491	0.489	0.357	0.356
11.03	11.188	16.926	16.984	1.159	1.159	37.116	37.371	1.51	1.509	0.861	0.854	0.357	0.357
11.419	11.582	13.535	13.578	1.37	1.369	34.745	34.959	1.431	1.43	1.398	1.388	0.601	0.601
11.766	11.94	2.041	2.042	1.441	1.44	33.449	33.72	1.439	1.438	1.485	1.475	0.598	0.598
9.545	9.684	2.183	2.184	1.556	1.555	41.908	42.14	1.428	1.426	1.412	1.403	0.662	0.662
6.415	6.476	2.122	2.123	1.534	1.533	42.218	42.516	1.633	1.632	0.845	0.845	0.615	0.615
6.629	6.695	1.808	1.809	1.52	1.519	2.39	2.397	1.74	1.739	0.853	0.852	0.627	0.627
6.407	6.469	34.839	34.938	1.535	1.533	2.465	2.473	0.827	0.827	1.28	1.278	0.73	0.73
6.301	6.361	35.753	35.854	1.449	1.448	2.318	2.325	0.819	0.819	1.35	1.349	0.725	0.724
6.564	6.628	35.444	35.543	2.137	2.145	2.301	2.308	1.291	1.289	1.195	1.194	0.349	0.349
6.163	6.221	21.482	21.54	2.137	2.145	18.526	18.618	1.202	1.2	1.152	1.152	0.354	0.354
3.581	3.564	21.728	21.786	2.103	2.111	19.619	19.715	1.236	1.235	0.847	0.847	0.539	0.539
3.638	3.621	1.541	1.542	2.458	2.47	18.514	18.607	2.804	2.802	0.873	0.872	0.545	0.545
3.48	3.465	1.583	1.584	2.129	2.137	22.793	22.931	2.691	2.689	3.12	3.133	0.367	0.367
3.499	3.483	2.022	2.025	3.12	3.121	21.435	21.555	0.981	0.981	3.217	3.231	0.376	0.376
3.401	3.386	2.046	2.049	3.111	3.113	22.651	22.774	0.951	0.951	4.009	4.003	0.317	0.317
20.516	20.789	3.302	3.298	3.077	3.078	22.053	22.194	25.305	25.247	0.834	0.837	0.318	0.318
20.454	20.72	3.327	3.318	30.913	31.062	12.525	12.646	24.765	24.706	0.971	0.977	0.155	0.155
20.307	20.575	4.688	4.682	9.065	9.097	12.508	12.63	1.335	1.334	3.649	3.689	0.153	0.153
20.392	20.664	4.632	4.626	3.774	3.804	12.547	12.665	32.612	32.534	3.541	3.579	0.118	0.118
10.759	10.963	0.917	0.918	29.602	30.073	14.635	14.744	31.5	31.425	3.336	3.372	0.118	0.118
10.516	10.715	0.91	0.911	12.894	13.08	14.95	15.06	33.449	33.371	2.208	2.203	0.161	0.161
10.185	10.379	0.959	0.96	4.107	4.171	14.827	14.938	40.842	40.747	0.999	1.006	0.161	0.161
10.75	10.953	1.583	1.586	9.774	9.884	20.897	20.983	22.157	22.108	2.049	2.069	0.217	0.217
10.45	10.648	1.543	1.546	7.068	7.176	20.959	21.045	44.674	44.594	1.399	1.408	0.212	0.212
10.713	10.916	1.513	1.515	7.021	7.128	19.418	19.494	32.305	32.228	19.494	19.055	0.2	0.2
2.048	2.065	1.599	1.602	7.555	7.67	28.961	29.126	48.608	48.494	0.936	0.941	0.2	0.199
2.061	2.079	1.548	1.548	5.347	5.442	28.803	28.964	32.873	32.795	7.399	7.204	0.522	0.522
2.076	2.093	1.668	1.668	5.674	5.735	25.537	25.672	56.511	56.372	5.818	5.66	0.52	0.52
2.051	2.068	1.616	1.616	17.021	17.264	26.995	27.142	3.07	3.067	5.198	5.054	0.164	0.163
1.877	1.892	1.333	1.333	37.013	37.369	30.26	30.466	3.125	3.122	6.092	5.928	0.163	0.163
2.315	2.33	2.242	2.244	6.352	6.5	26.56	26.689	3.441	3.438	6.388	6.217	1.592	1.591
2.526	2.544	2.341	2.344	4.62	4.66	31.133	31.283	2.762	2.76	6.637	6.461	10.791	10.782
2.382	2.398	2.273	2.276	4.707	4.747	32.412	32.576	3.413	3.409	7.281	7.091	1.214	1.213
2.666	2.687	2.398	2.401	4.796	4.836	33.492	33.665	8.183	8.174	5.076	4.938	0.643	0.643
2.597	2.617	0.918	0.918	4.913	4.963	25.673	25.799	3.191	3.189	4.622	4.524	0.653	0.653
7.336	7.438	0.911	0.911	4.514	4.553	26.633	26.742	1.423	1.423	5.014	4.871	11.981	11.983
7.606	7.714	0.637	0.637	4.51	4.548	11.666	11.678	3.32	3.316	7.863	7.658	4.266	4.296
7.554	7.662	2.663	2.661	4.704	4.752	10.303	10.313	3.579	3.575	5.237	5.095	4.441	4.472
7.242	7.339	2.781	2.78	4.633	4.673	11.495	11.507	7.835	7.826	5.552	5.398	23.557	23.531
2.456	2.464	2.686	2.684	5.234	5.277	8.721	8.724	1.69	1.689	7.474	7.56	19.897	19.875
2.605	2.614	2.72	2.719	9.76	9.977	13.381	13.395	1.246	1.246	7.979	8.077	21.252	21.219
2.561	2.57	2.615	2.613	7.597	7.731	5.842	5.832	3.252	3.247	4.046	4.08	14.597	14.576
5.274	5.306	2.118	2.123	7.147	7.262	23.639	23.793	2.649	2.649	7.476	7.559	14.191	14.171
5.265	5.298	2.29	2.294	8.38	8.546	22.989	23.138	18.728	18.687	7.194	7.273	0.603	0.602
5.275	5.307	2.474	2.479	11.516	11.796	23.155	23.305	22.192	22.141	1.878	1.893	0.401	0.401
11.31	11.437	0.952	0.952	6.63	6.744	23.471	23.623	24.348	24.292	1.924	1.94	3.077	3.074
12.215	12.358	0.95	0.95	7.74	7.879	19.118	19.228	9.776	9.759	1.519	1.531	3.026	3.023
11.398	11.524	0.946	0.946	10.803	11.066	30.053	30.25	9.051	9.035	2.346	2.356	3.05	3.047
11.904	12.043	1.07	1.07	6.377	6.461	30.649	30.851	5.952	5.943	0.684	0.683	2.966	2.963
6.72	6.826	1.045	1.045	5.397	5.465	30.822	31.026	11.135	11.116	1.71	1.707	0.2	0.2
6.658	6.762	9.094	9.12	17.973	18.117	20.421	20.515	10.979	10.961	1.578	1.577	26.841	26.814
6.66	6.773	7.365	7.383	17.115	17.252	20.372	20.47	5.978	5.968	1.341	1.34	6.275	6.272
4.83	4.902	8.535	8.562	19.294	19.439	19.984	20.081	6.101	6.091	1.503	1.502	17.024	17.002
4.82	4.887	2.459	2.463	19.73	19.873	15.039	15.124	4.849	4.841	1.357	1.356	16.882	16.859
6.486	6.587	9.543	9.572	23.913	24.063	14.547	14.627	4.947	4.938	5.024	5.008	0.873	0.873
5.68	5.765	8.5	8.523	16.702	16.849	13.995	14.07	5.484	5.48	5.108	5.089	0.155	0.155
6.734	6.84	8.066	8.087	20.743	20.891	3.353	3.355	5.34	5.336	4.894	4.885	4.473	4.504
5.61	5.701	9.325	9.35	25.277	25.429	4.029	4.03	5.147	5.143	4.992	4.98	4.403	4.434
6.129	6.201	9.218	9.245	22.189	22.332	3.514	3.516	5.396	5.392	5.064	5.048	26.854	26.853
5.828	5.898	9.562	9.589	13.804	13.955	17.86	17.976	30.438	30.383	4.999	4.981	42.098	42.094
5.636	5.704	8.852	8.876	26.745	27.058	19.24	19.381	28.15	28.098	3.493	3.489	30.003	30.001
5.783	5.852	8.786	8.81	27.032	27.369	18.32	18.448	30.572	30.515	7.418	7.23	57.656	57.647
5.379	5.444	9.267	9.292	25.284	25.571	18.14	18.276	26.699	26.651	7.053	6.873	24.97	24.971
5.786	5.856	9.249	9.275	28.461	28.833	5.17	5.207	22.136	22.094	7.78	7.58	42.739	42.736
5.921	5.991	10.747	10.779	24.798	25.038	5.668	5.707	16.817	16.795	7.937	7.731	56.669	56.661
6.099	6.172	5.301	5.301	27.221	27.51	5.754	5.793	18.257	18.232	3.226	3.196	43.439	43.434
13.948	14.099	5.305	5.306	27.065	27.326	10.116	10.187	18.444	18.419	3.316	3.283	31.684	31.684
12.86	13.001	4.833	4.834	26.245	26.5	10.441	10.515	10.549	10.536	3.986	3.929	49.433	49.427
15.138	15.298	4.929	4.93	26.928	27.206	9.938	10.009	2.829	2.826	4.076	4.013	41.408	41.405
13.422	13.568	4.782	4.783	26.991	27.266	10.599	10.673	4.181	4.178	1.24	1.245	58.614	58.605
13.94	14.09	4.596	4.597	25.476	25.728	18.32	18.39	4.801	4.796	1.275	1.28	37.611	37.61
14.725	14.882	4.201	4.204	27.379	27.62	16.798	16.867	5.246	5.241	1.271	1.276	57.87	57.861
2.309	2.327	4.359	4.36	9.805	9.942	18.419	18.488	4.803	4.798	1.29	1.296	42.64	42.635
2.168	2.185	4.246	4.246	7.907	8.22	17.939	18.009	2.71	2.709	3.234	3.249	36.208	36.207
1.264	1.271	3.707	3.707	7.949	8.264	18.177	18.233	2.864	2.864	2.871	2.885	37.247	37.245
1.342	1.349	29.069	29.178	7.937	8.251	2.923	2.943	2.77	2.769	3.32	3.336	5.814	5.817
1.977	1.991	26.574	26.674	7.892	8.203	2.832	2.852	2.401	2.401	3.252	3.267	5.093	5.096
5.004	5.065	21.844	21.926	7.871	8.179	2.911	2.933	2.071	2.07	3.047	3.062	6.206	6.208
4.738	4.793	27.682	27.787	7.931	8.246	3.019	3.039	2.992	2.991	2.833	2.837	5.648	5.651
4.523	4.575	25.586	25.682	7.935	8.25	3.466	3.493	2.431	2.431	3.426	3.443	5.632	5.635
4.727	4.783	20.827	20.905	11.197	11.337	2.751	2.769	2.883	2.883	3.365	3.38	6.331	6.334
5.017	5.076	14.318	14.356	12.109	12.303	3.567	3.598	1.029	1.029	3.404	3.342	6.02	6.023
4.623	4.676	29.632	29.744	12.381	12.575	3.059	3.078	0.965	0.964	3.436	3.37	4.098	4.1
4.519	4.586	19.851	19.926	12.67	12.865	22.307	22.455	0.97	0.969	3.572	3.499	4.238	4.236
4.594	4.661	20.749	20.826	12.42	12.623	22.03	22.177	0.984	0.983	3.761	3.682	3.67	3.669
4.789	4.861	5.358	5.349	4.327	4.347	27.957	28.048	0.977	0.976	0.806	0.805	4.399	4.397
4.6	4.666	5.736	5.726	4.294	4.313	27.957	28.048	12.295	12.277	0.82	0.82	4.526	4.524
4.529	4.595	2.137	2.138	4.332	4.351	36.78	37.038	11.858	11.842	0.835	0.835	2.326	2.326
2.665	2.688	4.75	4.746	4.3	4.321	36.908	37.151	12.211	12.194	1.232	1.241	2.842	2.841
2.925	2.951	4.781	4.782	4.626	4.686	24.09	24.186	12.155	12.137	1.112	1.116	4.222	4.22
2.743	2.767	4.911	4.908	4.659	4.719	24.815	24.917	14.85	14.828	1.103	1.112	3.68	3.678
2.759	2.783	4.638	4.637	4.757	4.819	29.858	29.988	2.507	2.503	2.543	2.581	3.354	3.353
2.671	2.694	4.654	4.651	4.672	4.735	31.338	31.488	2.521	2.517	2.234	2.264	1.42	1.419
2.799	2.823	4.985	4.979	4.502	4.57	17.977	17.977	2.378	2.374	1.475	1.476	1.438	1.437
5.691	5.781	3.563	3.56	4.466	4.532	13.97	13.941	2.791	2.788	1.488	1.489	1.231	1.23
4.891	4.965	4.997	4.987	4.502	4.571	15.387	15.393	2.112	2.109	1.534	1.532	1.458	1.457
5.875	5.968	4.348	4.344	4.658	4.731	15.276	15.281	1.238	1.237	3.887	3.877	1.418	1.417
6.254	6.354	3.957	3.96	4.05	4.123	6.915	6.936	2.812	2.808	1.171	1.169	1.405	1.404
5.662	5.751	3.972	3.975	3.984	4.053	6.661	6.68	2.621	2.617	1.269	1.276	1.33	1.329
5.089	5.167	4.023	4.026	4.01	4.08	13.276	13.299	2.474	2.471	1.177	1.182	0.251	0.251
2.666	2.684	4.162	4.166	3.963	4.031	13.071	13.09	2.464	2.46	1.108	1.112	0.26	0.26
2.632	2.649	3.143	3.144	5.116	5.163	9.388	9.396	2.805	2.801	0.853	0.853	0.253	0.252
2.732	2.75	2.901	2.902	5.316	5.363	9.353	9.361	2.483	2.48	0.927	0.927	0.249	0.249
1.501	1.504	3.101	3.102	5.463	5.513	7.486	7.518	2.779	2.776	0.901	0.901	0.25	0.25
5.014	5.122	3.15	3.151	5.24	5.287	8.081	8.112	3.061	3.059	0.953	0.953	0.244	0.244
5.127	5.239	3.833	3.836	4.966	5.012	6.873	6.874	3.123	3.121	1.59	1.595	1.6	1.6
5.15	5.263	3.928	3.932	11.68	11.846	7.164	7.163	3.274	3.271	1.532	1.537	0.659	0.659
5.129	5.241	3.403	3.405	11.696	11.862	11.314	11.345	2.4	2.397	1.53	1.535	0.658	0.658
5.464	5.594	8.181	8.188	11.644	11.809	11.299	11.332	2.375	2.372	1.539	1.544	0.628	0.628
4.778	4.876	8.473	8.481	11.394	11.525	41.88	41.893	2.336	2.334	0.815	0.818	2.851	2.862
4.12	4.156	8.319	8.327	10.837	10.962	42.315	42.327	0.827	0.827	0.83	0.833	2.844	2.855
4.134	4.17	8.556	8.564	10.646	10.768	46.67	46.684	0.835	0.835	0.83	0.832	2.776	2.786
4.273	4.31	5.356	5.367	9.824	9.934	78.157	78.262	0.829	0.829	0.714	0.715	2.788	2.799
4.035	4.07	4.784	4.793	11.66	11.799	77.284	77.409	32.781	32.718	0.71	0.711	23.206	23.204
3.88	3.913	5.833	5.845	10.248	10.362	84.854	84.806	31.382	31.323	3.297	3.317	21.973	21.972
4.017	4.069	4.729	4.737	11.006	11.148	83.44	83.368	31.039	30.98	3.289	3.309	22.417	22.416
4.163	4.218	4.534	4.542	10.806	10.945	84.115	84.059	1.091	1.091	1.509	1.522	22.005	22.004
4.25	4.306	4.633	4.641	10.709	10.845	83	82.853	1.131	1.13	3.208	3.235	20.433	20.433
3.791	3.844	3.715	3.721	10.761	10.898	82.941	82.795	1.128	1.128	2.589	2.612	23.238	23.237
3.777	3.831	8.524	8.549	10.977	11.119	83.253	83.506	30.1	30.056	1.097	1.1	2.545	2.544
3.793	3.844	8.293	8.319	2.777	2.796	82.538	82.79	27.986	27.947	1.1	1.102	2.738	2.737
3.75	3.803	6.371	6.391	2.785	2.804	46.406	46.123	32.377	32.329	0.583	0.582	2.512	2.511
3.065	3.104	7.345	7.367	2.317	2.33	46.963	46.627	3.282	3.278	0.587	0.585	2.407	2.406
2.927	2.962	6.747	6.768	2.193	2.205	65.773	65.475	3.302	3.298	4.412	4.467	13.999	14.004
2.774	2.807	9.425	9.453	24.67	24.861	63.855	63.534	3.158	3.155	4.493	4.55	13.955	13.96
2.426	2.448	3.335	3.341	13.5	13.652	68.642	68.375	1.902	1.9	1.442	1.454	13.825	13.83
2.402	2.423	3.703	3.71	12.222	12.38	15.034	14.98	1.627	1.625	1.441	1.452	13.936	13.942
5.706	5.725	3.689	3.695	13.016	13.171	15.332	15.277	1.957	1.955	2.134	2.142	23.361	23.355
5.631	5.65	3.508	3.514	12.922	13.077	29.141	28.84	1.949	1.946	2.294	2.302	24.829	24.821
5.629	5.648	3.304	3.308	3.199	3.206	27.764	27.478	3.717	3.713	2.271	2.279	23.323	23.317
3.611	3.634	3.52	3.526	3.199	3.206	14.581	14.556	3.636	3.632	2.208	2.225	23.965	23.958
3.523	3.544	6.969	6.975	3.326	3.335	11.281	11.31	3.627	3.624	2.242	2.259	2.807	2.816
3.617	3.64	7.323	7.329	3.186	3.194	64.114	63.957	8.375	8.366	0.714	0.72	2.778	2.786
1.109	1.114	6.19	6.196	8.577	8.736	65.396	65.254	8.779	8.765	4.003	4.039	2.804	2.812
1.119	1.124	6.872	6.878	6.3	6.389	5.359	5.406	8.764	8.749	3.987	4.022	2.785	2.793
5.415	5.469	6.86	6.866	6.102	6.187	5.06	5.105	8.759	8.743	0.833	0.837	9.271	9.272
5.004	5.048	17.762	17.823	4.675	4.723	8.25	8.321	1.068	1.067	1.046	1.052	9.498	9.499
4.55	4.588	16.846	16.902	4.382	4.432	7.833	7.9	1.095	1.095	2.158	2.164	9.334	9.335
3.63	3.672	17.655	17.712	4.692	4.737	3.872	3.902	1.125	1.125	0.68	0.682	9.984	9.985
3.652	3.695	17.515	17.575	4.522	4.57	3.877	3.907	1.083	1.082	0.983	0.985	9.944	9.945
2.013	2.008	17.099	17.154	5.261	5.27	8.115	8.185	7.432	7.416	0.177	0.177	9.094	9.096
2.053	2.048	15.65	15.699	5.281	5.292	7.11	7.171	6.481	6.467	0.142	0.142	6.433	6.431
1.824	1.82	4.938	4.91	5.268	5.275	1.758	1.76	6.854	6.839	0.617	0.624	6.428	6.425
0.885	0.889	4.996	4.967	5.269	5.275	1.529	1.531	5.666	5.654	3.518	3.48	6.456	6.453
0.865	0.869	5.042	5.013	3.853	3.884	1.514	1.515	7.617	7.6	3.59	3.55	6.456	6.454
1.987	2	5.278	5.254	3.901	3.933	11.424	11.418	5.876	5.864	3.633	3.591	6.066	6.064
2.022	2.036	5.123	5.093	3.933	3.968	11.771	11.766	0.641	0.641	0.563	0.561	2.505	2.504
2.056	2.069	1.127	1.129	3.274	3.295	12.567	12.563	0.647	0.647	1.052	1.05	2.628	2.627
0.627	0.628	1.165	1.166	3.298	3.32	11.539	11.53	2.521	2.519	0.837	0.838	1.891	1.902
0.625	0.627	1.191	1.193	3.301	3.323	11.536	11.532	2.659	2.658	1.239	1.247	1.958	1.97
4.808	4.881	1.262	1.264	3.285	3.307	12.921	12.915	2.114	2.113	1.187	1.195	2	2.012
3.276	3.291	1.094	1.096	4.302	4.378	22.069	22.107	2.349	2.348	1.224	1.232	1.951	1.963
5.093	5.125	3.178	3.162	4.281	4.36	19.161	19.187	2.117	2.113	1.265	1.268	7.319	7.32
7.922	7.984	7.139	7.105	4.289	4.364	22.581	22.633	2.035	2.033	1.262	1.265	7.185	7.186
11.683	11.853	5.143	5.113	4.306	4.385	20.201	20.255	2.116	2.113	1.66	1.67	7.334	7.335
4.133	4.188	7.584	7.55	4.32	4.396	19.294	19.341	2.15	2.148	1.386	1.392	7.14	7.141
3.783	3.839	6.084	6.053	2.933	2.94	15.981	16.023	2.144	2.143	1.596	1.596	14.331	14.326
2.394	2.415	2.142	2.143	2.944	2.951	16.169	16.224	2.212	2.211	5.104	5.079	14.136	14.131
7.486	7.593	2.15	2.15	2.906	2.913	16.098	16.156	1.21	1.209	5.114	5.087	14.238	14.233
8.012	8.075	7.381	7.395	2.886	2.893	16.118	16.174	1.189	1.188	0.893	0.893	14.363	14.358
4.887	4.945	7.308	7.323	3.465	3.501	4.985	5.028	1.199	1.199	0.903	0.903	18.891	18.881
2.619	2.642	7.221	7.235	3.519	3.555	4.86	4.902	1.191	1.19	0.5	0.499	19.569	19.559
7.755	7.819	7.268	7.282	3.368	3.403	4.767	4.807	1.56	1.559	0.51	0.509	18.783	18.773
3.644	3.686	7.326	7.34	15.213	15.877	4.29	4.326	1.608	1.606	0.894	0.886	18.958	18.948
2.108	2.103	6.594	6.609	15.169	15.827	5.183	5.228	1.63	1.629	1.509	1.499	19.649	19.638
5.934	5.978	7.362	7.38	15.391	16.039	5.259	5.304	1.544	1.543	1.613	1.602	17.262	17.253
1.507	1.51	7.325	7.342	15.341	15.964	5.18	5.232	1.671	1.67	1.548	1.538	18.151	18.142
1.161	1.167	7.355	7.372	15.303	15.963	5.002	5.051	2.903	2.901	0.857	0.857	18.347	18.337
2.079	2.097	12.155	12.2	2.271	2.299	5.1	5.15	2.782	2.78	0.856	0.856	15.962	15.962
6.63	6.735	12.088	12.133	2.537	2.562	4.854	4.901	2.774	2.768	1.086	1.089	14.886	14.886
53.454	53.955	11.981	12.025	2.514	2.539	2.286	2.303	2.625	2.62	1.136	1.14	15.029	15.029
36.908	37.312	10.308	10.344	2.394	2.42	2.28	2.297	2.648	2.643	1.029	1.031	15.402	15.401
49.183	49.643	5.975	5.981	4.208	4.268	4.445	4.484	2.045	2.042	0.922	0.922	14.887	14.887
53.367	53.861	6.39	6.396	4.153	4.212	11.566	11.516	2.088	2.086	0.815	0.815	3.79	3.795
48.063	48.514	6.189	6.196	4.15	4.209	12.889	12.84	1.999	1.999	0.835	0.835	4.069	4.074
49.962	50.441	5.245	5.252	4.24	4.301	11.941	11.891	2.163	2.164	6.591	6.557	4.197	4.202
48.022	48.489	12.437	12.496	14.399	14.954	8.211	8.252	33.601	33.522	6.83	6.795	4.226	4.231
33.494	33.815	12.207	12.264	14.735	15.328	8.291	8.331	30.883	30.838	4.055	4.043	4.344	4.349
23.133	23.372	12.122	12.178	14.104	14.601	10.576	10.612	3.163	3.16	1.122	1.128	5.64	5.637
40.234	40.658	6.96	6.983	5.279	5.366	10.59	10.625	31.026	31.233	0.671	0.677	5.317	5.314
48.335	48.8	6.916	6.939	5.574	5.664	10.252	10.286	28.229	28.436	1.927	1.923	5.339	5.337
47.546	48.011	1.416	1.417	5.363	5.452	3.335	3.353	21.522	21.704	1.657	1.655	5.222	5.22
35.339	35.575	1.474	1.476	5.263	5.349	3.337	3.355	15.64	15.766	1.36	1.359	2.456	2.464
36.322	36.574	2.554	2.559	4.465	4.516	3.443	3.461	21.376	21.625	2.817	2.794	2.371	2.379
36.407	36.662	2.569	2.574	4.641	4.694	3.519	3.537	19.026	19.125	0.71	0.711	2.428	2.436
36.158	36.402	8.073	8.029	13.445	13.917	12.432	12.494	29.191	29.395	1.876	1.891	2.463	2.471
35.658	35.895	6.985	6.948	12.965	13.405	12.463	12.528	8.682	8.734	1.113	1.119	6.516	6.515
35.082	35.316	2.097	2.096	10.042	10.215	4.944	4.99	27.927	28.125	6.624	6.456	6.33	6.329
36.464	36.724	2.105	2.104	10.185	10.363	4.827	4.871	3.663	3.669	0.807	0.807	6.661	6.659
34.076	34.3	1.183	1.184	10.167	10.347	4.83	4.874	1.974	1.979	21.943	22.173	7.059	7.057
33.401	33.619	1.166	1.166	10.595	10.792	5.879	5.927	1.977	1.982	21.668	21.882	6.913	6.912
7.649	7.65	1.316	1.317	3.885	3.959	5.963	6.012	2.783	2.795	22.713	22.926	0.187	0.187
11.76	11.785	0.966	0.967	4.079	4.158	5.797	5.845	2.773	2.784	20.621	20.83	0.182	0.182
24.911	25.06	0.945	0.946	4.046	4.124	2.804	2.813	1.671	1.672	21.589	21.807	0.18	0.18
7.07	7.074	0.931	0.932	1.52	1.53	2.761	2.77	3.351	3.355	20.758	20.973	0.388	0.387
24.546	24.686	0.974	0.975	1.583	1.594	2.993	3	3.027	3.042	22.584	22.809	0.387	0.387
24.952	25.385	2.097	2.095	3.657	3.714	2.764	2.771	0.841	0.841	17.644	17.826	0.981	0.98
20.754	21.104	2.087	2.086	4.319	4.397	2.729	2.738	1.463	1.464	16.454	16.56	1.008	1.007
25.049	25.46	2.11	2.109	3.971	4.037	0.574	0.574	1.696	1.697	27.062	27.3	0.987	0.986
24.01	24.439	2.097	2.094	3.697	3.754	0.581	0.581	3.965	3.98	22.459	22.692	0.992	0.991
23.474	23.89	1.216	1.217	3.866	3.929	0.573	0.573	1.352	1.355	19.581	19.776	0.995	0.995
24.22	24.638	1.237	1.239	3.981	4.047	0.601	0.601	0.856	0.857	23.901	24.126	3.084	3.083
23.541	23.991	1.218	1.219	4.469	4.536	0.834	0.835	2.952	2.962	11.74	11.97	3.179	3.178
9.554	9.607	1.249	1.251	3.499	3.554	0.819	0.82	1.56	1.564	12.898	13.149	3.261	3.26
9.838	9.894	1.122	1.121	3.883	3.943	0.827	0.828	27.706	27.958	5.374	5.455	3.209	3.207
9.546	9.599	1.131	1.13	3.519	3.571	0.815	0.816	29.688	29.923	11.556	11.792	3.382	3.38
9.409	9.462	0.794	0.794	3.171	3.219	0.828	0.83	30.254	30.485	11.002	11.22	3.236	3.234
9.753	9.808	1.527	1.527	9.199	9.304	0.827	0.829	18.032	18.288	3.233	3.247	3.228	3.226
9.224	9.274	1.651	1.652	9.319	9.425	0.818	0.819	17.39	17.635	3.225	3.24	3.15	3.148
7.333	7.342	1.527	1.527	9.172	9.277	0.805	0.807	21.345	21.586	3.032	3.043	3.208	3.206
9.739	9.749	1.567	1.567	9.589	9.698	2.469	2.477	36.195	36.402	2.729	2.733	3.407	3.41
8.239	8.248	1.358	1.359	9.163	9.268	2.574	2.583	37.26	37.455	4.584	4.654	3.421	3.423
8.268	8.277	1.087	1.088	0.944	0.949	2.616	2.625	6.371	6.423	10.889	11.077	3.707	3.706
7.587	7.595	1.128	1.129	0.871	0.876	10.213	10.308	6.62	6.676	9.511	9.673	3.639	3.638
7.39	7.577	1.213	1.215	0.868	0.873	10.304	10.396	4.116	4.131	8.25	8.389	8.772	8.76
7.278	7.458	0.822	0.822	0.914	0.919	10.307	10.398	4.248	4.264	10.732	10.915	8.442	8.431
7.292	7.47	0.821	0.821	0.898	0.903	10.343	10.433	6.832	6.895	9.592	9.754	1.116	1.115
7.396	7.583	0.818	0.818	1.362	1.363	10.226	10.317	6.144	6.195	6.391	6.353	1.083	1.082
28.818	29.142	1.034	1.034	1.643	1.644	0.878	0.879	6.242	6.295	6.666	6.626	0.595	0.595
29.24	29.569	1.062	1.062	1.391	1.391	1.153	1.156	6.485	6.542	6.195	6.155	0.572	0.572
29.311	29.642	18.274	18.336	1.677	1.678	1.129	1.132	6.272	6.321	6.297	6.26	1.422	1.422
28.597	28.919	8.79	8.812	1.815	1.819	1.13	1.132	7.987	8.061	6.544	6.506	1.436	1.437
28.958	29.285	9.436	9.464	2.507	2.519	1.111	1.113	7.238	7.299	5.931	5.889	0.337	0.337
28.918	29.243	4.684	4.68	2.513	2.525	1.195	1.198	7.028	7.092	4.374	4.351	0.346	0.346
8.777	8.867	5.581	5.594	2.521	2.533	1.257	1.261	9.164	9.262	20.051	20.258	0.332	0.331
8.965	9.057	6.029	6.043	2.515	2.528	1.25	1.254	2.159	2.159	19.065	19.266	0.49	0.489
8.783	8.873	6.274	6.288	2.384	2.398	1.201	1.204	2.156	2.156	21.157	21.379	0.482	0.482
9.288	9.385	7.657	7.676	7.606	7.696	1.195	1.198	2.152	2.153	21.758	21.99	0.457	0.457
7.982	8.063	6.12	6.135	7.606	7.696	1.337	1.342	3.082	3.085	7.453	7.514	0.465	0.464
8.146	8.22	7.383	7.402	7.366	7.455	1.596	1.603	0.964	0.964	7.996	8.062	0.806	0.806
7.751	7.823	6.9	6.916	8.358	8.45	1.513	1.52	44.14	44.186	9.921	9.995	0.807	0.807
7.997	8.069	6.469	6.485	7.597	7.687	1.484	1.49	41.66	41.747	10.723	10.802	0.942	0.942
7.656	7.728	7.281	7.299	4.58	4.611	1.396	1.401	49.64	49.72	1.38	1.387	0.869	0.869
7.675	7.746	7.42	7.438	4.22	4.244	1.885	1.885	46.94	47.015	1.47	1.478	0.893	0.893
44.793	45.184	8.648	8.671	4.451	4.48	1.888	1.888	8.692	8.679	1.438	1.445	1.231	1.231
44.304	44.692	9.785	9.845	13.45	13.922	1.886	1.886	9.503	9.488	1.529	1.537	1.233	1.232
44.759	45.151	9.981	10.043	5.257	5.344	1.883	1.883	9.054	9.041	5.266	5.335	0.423	0.422
44.359	44.744	9.238	9.3	5.279	5.289	1.881	1.882	7.514	7.504	4.76	4.821	0.429	0.428
8.356	8.347	8.897	8.952	7.931	8.245	1.367	1.37	6.278	6.27	5.354	5.425	0.581	0.581
8.636	8.631	8.648	8.703	4.036	4.108	1.3	1.303	10.087	10.071	5.267	5.337	0.583	0.583
8.573	8.567	9.284	9.35	4.261	4.309	1.301	1.304	7.195	7.185	5.06	5.125	0.526	0.526
7.654	7.693	10.559	10.647	3.91	3.943	1.38	1.383	9.543	9.528	5.464	5.519	0.532	0.532
7.646	7.694	8.354	8.396	11.131	11.276	1	1	0.704	0.704	5.493	5.566	0.123	0.123
7.576	7.617	7.197	7.232	10.786	10.923	0.987	0.987	1.007	1.006	5.493	5.564	0.124	0.124
9.773	10.043	6.285	6.311	10.596	10.73	0.976	0.976	1.009	1.009	17.206	17.34	0.255	0.255
9.287	9.551	5.004	5.022	12.643	12.838	0.986	0.986	1.009	1.008	17.688	17.825	0.252	0.252
9.988	10.262	4.762	4.778	4.339	4.358	0.985	0.985	1.008	1.008	18.319	18.462	0.116	0.116
9.298	9.561	4.199	4.212	15.357	15.997	1.561	1.568	3.114	3.107	18.613	18.758	0.116	0.116
14.172	14.339	4.825	4.841	10.73	10.99	1.391	1.396	3.168	3.162	1.006	1.003	0.166	0.166
14.066	14.232	4.61	4.625	4.678	4.738	1.372	1.377	3.105	3.099	1.028	1.025	0.166	0.166
13.635	13.795	3.797	3.809	5.12	5.283	1.406	1.411	2.943	2.937	0.998	0.995	0.161	0.16
6.058	6.121	2.756	2.763	5.292	5.463	1.383	1.388	2.876	2.871	1.501	1.511	0.157	0.157
7.317	7.399	4.805	4.822	5.431	5.608	2.277	2.29	4.339	4.33	8.666	8.811	0.167	0.167
13.483	13.641	3.965	3.978	6.099	6.325	2.373	2.388	4.25	4.242	7.772	7.889	0.169	0.169
10.962	11.09	4.111	4.125	4.904	5.058	2.493	2.509	4.09	4.082	11.499	11.663	0.338	0.338
14.858	15.034	14.3	14.353	4.887	5.039	2.605	2.621	3.663	3.659	11.293	11.454	0.339	0.339
8.977	9.077	14.689	14.744	5.65	5.854	3.075	3.076	3.979	3.972	1.713	1.714	0.134	0.134
15.74	15.878	11.713	11.754	5.171	5.338	38.475	38.113	3.919	3.916	1.739	1.741	0.133	0.133
17.182	17.335	14.034	14.086	6.315	6.532	48.085	47.635	1.98	1.977	1.529	1.527	2.484	2.483
18.32	18.484	14.786	14.842	24.298	24.506	43.032	43.305	1.81	1.808	4.182	4.163	6.332	6.334
16.924	17.075	14.511	14.566	23.094	23.291	41.453	41.623	1.688	1.686	0.841	0.836	1.108	1.108
18.336	18.499	14.443	14.497	22.795	22.99	9.199	9.248	1.672	1.67	1.244	1.253	0.655	0.655
17.719	17.877	14.211	14.265	23.519	23.719	22.719	22.765	1.981	1.978	1.146	1.154	0.661	0.661
15.811	15.952	14.261	14.315	25.514	25.735	8.021	8.061	1.625	1.624	1.07	1.076	15.422	15.422
16.032	16.173	12.641	12.687	23.185	23.376	22.922	23.071	1.558	1.556	1.254	1.258	2.321	2.329
11.939	12.082	16.599	16.663	23.144	23.342	23.443	23.594	1.966	1.963	1.535	1.54	2.402	2.409
9.133	9.242	13.64	13.691	24.538	24.745	14.949	15.059	1.894	1.891	1.441	1.446	42.269	42.265
15.482	15.669	6.215	6.224	22.331	22.522	11.084	11.13	1.74	1.738	1.613	1.618	35.977	35.976
10.312	10.434	6.178	6.187	24.284	24.469	4.803	4.846	2.063	2.061	3.117	3.146	36.889	36.887
12.038	12.182	6.236	6.244	12.67	12.815	1.729	1.731	2.069	2.068	3.115	3.142	25.066	25.059
15.779	15.97	6.273	6.281	12.495	12.631	24.674	24.866	2.052	2.051	3.087	3.114	23.115	23.108
8.07	8.155	9.763	9.764	13.136	13.29	5.211	5.25	1.186	1.187	3.073	3.099	0.843	0.842
7.534	7.613	8.452	8.452	13.387	13.541	9.346	9.392	1.179	1.179	1.038	1.039	0.381	0.381
2.776	2.793	9.456	9.456	14.849	15.034	47.294	47.002	1.183	1.184	1.068	1.068	3.234	3.232
3.082	3.102	9.647	9.647	11.935	12.065	7.008	7.041	1.305	1.305	1.079	1.079	3.178	3.176
6.501	6.567	5.951	5.964	13.615	13.776	46.519	46.147	1.298	1.299	2.822	2.834	3.224	3.223
8.451	8.519	6.011	6.023	15.385	15.579	43.52	43.166	1.3	1.3	2.572	2.581	3.226	3.225
7.864	7.926	5.709	5.723	14.326	14.498	10.247	10.225	0.665	0.665	4.869	4.948	0.168	0.168
7.498	7.557	15.405	15.484	10.547	10.65	26.1	26.225	0.662	0.662	4.856	4.934	48.46	48.454
7.907	7.969	15.864	15.945	16.73	16.992	18.986	19.047	0.663	0.664	2.022	2.038	5.163	5.166
8.322	8.388	15.631	15.712	16.96	17.233	7.048	7.081	21.016	21.021	2.276	2.293	17.945	17.935
7.646	7.706	15.992	16.074	15.862	16.102	8.035	8.076	22.28	22.279	2.547	2.566	18.548	18.538
4.825	4.931	5.627	5.635	17.856	18.155	40.613	40.238	21.724	21.746	0.617	0.616	1.424	1.423
4.951	5.054	5.367	5.375	15.444	15.664	19.246	19.388	3.496	3.495	0.622	0.621	0.257	0.257
5.313	5.425	5.852	5.862	17.435	17.741	2.171	2.183	3.684	3.682	0.821	0.819	2.416	2.424
4.959	5.061	5.403	5.41	16.887	17.162	5.278	5.286	3.691	3.689	0.831	0.829	2.392	2.4
4.831	4.932	5.331	5.338	16.672	16.957	5.647	5.636	3.706	3.704	2.651	2.68	13.62	13.616
3.36	3.392	5.281	5.288	17.212	17.511	18.557	18.65	3.592	3.591	2.666	2.695	9.601	9.599
3.26	3.291	4.539	4.544	17.113	17.405	19.201	19.296	3.487	3.485	1.542	1.553	12.982	12.979
3.343	3.375	5.222	5.234	16.907	17.221	12.515	12.636	3.753	3.751	1.542	1.553	11.024	11.021
3.329	3.361	4.885	4.896	16.818	17.074	9.262	9.277	8.956	8.966	1.689	1.702	10.546	10.544
3.367	3.399	4.296	4.306	7.973	8.037	39.898	39.524	10.162	10.169	1.751	1.767	8.463	8.461
3.326	3.358	4.713	4.724	11.298	12.021	5.197	5.247	10.913	10.919	1.696	1.709	10.265	10.263
16.991	17.279	4.346	4.355	11.37	12.1	23.622	23.777	4.449	4.445	1.443	1.453	6.328	6.327
14.141	14.367	5.598	5.612	11.382	12.112	16.799	16.905	5.027	5.021	1.516	1.526	8.272	8.271
17.744	18.048	2.997	3	11.39	12.118	13.378	13.471	4.978	4.972	0.415	0.418	9.785	9.783
19.359	19.694	3.322	3.326	11.392	12.12	15.366	15.477	4.954	4.948	3.95	3.99	8.454	8.452
16.962	17.249	3.363	3.366	11.309	12.033	15.259	15.348	2.245	2.243	3.849	3.888	11.181	11.178
14.632	14.872	3.218	3.222	11.334	12.06	13.748	13.849	1.26	1.26	0.472	0.471	8.001	8
2.326	2.342	3.061	3.063	4.945	5.02	35.106	35.341	1.351	1.351	2.044	2.049	11.16	11.157
2.377	2.393	3.129	3.133	5.719	5.831	15.657	15.759	1.72	1.719	1.108	1.112	11.966	11.963
2.288	2.304	11.609	11.658	5.647	5.753	8.713	8.779	8.235	8.217	0.864	0.866	5.841	5.84
2.718	2.733	13.475	13.538	5.605	5.707	12.961	13.055	8.428	8.41	0.64	0.631	5.657	5.656
9.047	9.576	10.475	10.514	5.908	6.027	10.547	10.627	8.969	8.95	0.156	0.155	5.207	5.209
9.376	9.937	11.408	11.455	4.233	4.343	57.397	57.882	7.62	7.604	0.13	0.13	4.961	4.963
9.507	10.082	10.483	10.523	4.101	4.204	57.122	57.597	9.666	9.645	0.649	0.65	5.854	5.855
9.473	10.045	4.394	4.407	4.25	4.36	56.581	57.056	7.187	7.172	4.518	4.586	5.414	5.416
9.106	9.644	4.428	4.441	4.134	4.239	47.204	47.602	0.718	0.718	4.515	4.582	5.254	5.256
8.145	8.584	3.562	3.572	10.462	11.098	47.171	47.569	0.728	0.728	4.387	4.451	5.82	5.821
4.064	4.094	4.665	4.68	10.306	10.925	56.047	56.518	8.17	8.162	1.114	1.122	5.589	5.59
4.082	4.112	4.03	4.042	9.809	10.373	57.626	58.088	8.75	8.742	2.387	2.413	2.387	2.389
4.276	4.308	4.786	4.8	10.796	11.465	48.262	48.664	6.305	6.3	1.383	1.396	4.176	4.176
3.946	3.975	7.828	7.86	4.238	4.363	52.904	53.353	7.483	7.476	0.882	0.887	4.08	4.08
3.73	3.757	7.708	7.74	4.173	4.294	48.119	48.536	2.415	2.411	0.982	0.987	4.648	4.648
5.982	6.05	7.571	7.602	4.253	4.38	50.766	51.181	3.114	3.111	0.947	0.952	2.958	2.958
6.377	6.45	6.83	6.858	4.51	4.651	50.349	50.775	2.495	2.492	1.098	1.104	3.079	3.079
6.469	6.543	7.489	7.52	3.865	3.936	51.268	51.702	4.827	4.825	1.095	1.1	3.599	3.6
3.299	3.349	1.751	1.754	3.751	3.819	50.179	50.593	4.814	4.812	1.345	1.354	4.056	4.057
3.293	3.345	1.817	1.821	3.796	3.865	48.753	49.182	3.213	3.212	1.147	1.153	3.991	3.991
3.276	3.324	1.875	1.879	3.715	3.782	51.658	52.069	5.104	5.096	1.833	1.828	4.019	4.02
3.242	3.291	1.972	1.977	3.104	3.139	53.265	53.705	5.011	5.004	5.794	5.74	17.905	17.899
13.422	13.601	1.669	1.672	3.533	3.568	39.686	39.989	5.048	5.041	5.772	5.717	23.151	23.144
12.645	12.814	18.547	18.61	4.135	4.179	47.966	48.358	5.117	5.11	1.074	1.074	11.419	11.414
11.273	11.421	15.028	15.084	3.244	3.275	46.459	46.843	3.636	3.632	1.089	1.088	14.368	14.364
1.641	1.651	14.054	14.106	3.199	3.237	41.147	41.459	3.339	3.335	0.602	0.602	15.733	15.727
1.67	1.681	14.853	14.909	10.586	10.694	48.68	49.089	3.325	3.322	0.613	0.613	13.309	13.304
0.787	0.79	12.531	12.579	10.511	10.619	1.732	1.745	3.624	3.619	0.958	0.956	12.013	12.009
0.759	0.762	7.295	7.312	10.729	10.837	1.761	1.775	3.701	3.695	1.252	1.253	0.377	0.376
0.755	0.758	7.324	7.34	22.915	23.082	1.331	1.34	6.291	6.282	1.331	1.332	0.39	0.389
7.484	7.515	6.838	6.856	23.782	23.928	1.478	1.488	6.648	6.639	1.225	1.226	0.382	0.381
7.455	7.483	6.781	6.799	24.157	24.31	9.661	9.715	2.401	2.398	0.88	0.881	0.371	0.371
7.581	7.613	6.707	6.725	25.815	25.945	8.234	8.283	2.153	2.151	0.874	0.875	0.378	0.378
1.597	1.608	6.753	6.771	21.658	21.815	9.686	9.741	2.255	2.252	1.733	1.73	0.371	0.371
1.599	1.61	6.776	6.794	24.126	24.3	7.913	7.96	7.673	7.661	1.845	1.842	2.289	2.289
2.154	2.177	6.024	6.034	9.85	9.948	9.175	9.228	7.597	7.585	1.674	1.669	5.432	5.43
2.059	2.079	6.513	6.525	9.76	9.856	8.731	8.782	4.975	4.97	0.812	0.814	4.792	4.79
1.743	1.759	6.47	6.482	9.601	9.695	7.79	7.837	4.668	4.663	0.524	0.524	2.915	2.914
13.726	13.846	6.497	6.509	9.633	9.727	78.821	79.623	24.041	24.227	0.55	0.55	2.928	2.933
13.504	13.621	5.933	5.95	9.749	9.846	78.325	79.121	22.396	22.412	6.288	6.267	2.937	2.942
3.184	3.188	5.722	5.738	1.438	1.444	80.587	81.393	3.689	3.687	6.583	6.563	2.806	2.811
3.194	3.198	5.823	5.84	1.384	1.391	78.264	79.061	4.686	4.677	5.548	5.501	2.803	2.807
2.962	2.966	5.897	5.914	1.567	1.574	53.021	53.543	4.738	4.73	1.44	1.448	32.063	32.036
1.649	1.656	3.895	3.905	1.3	1.307	62.49	63.105	4.562	4.554	0.399	0.402	33.03	33.002
1.596	1.602	4.152	4.163	14.811	15.032	56.876	57.441	4.072	4.062	10.873	11.061	32.455	32.428
0.404	0.403	4.039	4.05	9.967	10.034	51.937	52.448	5.21	5.208	10.879	11.066	33.504	33.477
0.407	0.406	3.467	3.475	9.124	9.186	61.91	62.531	1.979	1.975	8.961	9.111	32.048	32.019
0.41	0.409	5.576	5.592	9.51	9.573	61.689	62.307	4.693	4.684	3.445	3.414	33.525	33.499
0.559	0.559	5.289	5.304	9.428	9.491	52.958	53.48	2.699	2.691	2.546	2.555	7.465	7.463
0.558	0.558	5.157	5.172	2.511	2.52	65.418	66.058	4.649	4.64	3.237	3.251	7.274	7.272
5.349	5.462	2.173	2.178	2.511	2.521	57.343	57.908	1.112	1.11	2.372	2.378	7.059	7.057
6.927	6.935	2.17	2.175	2.495	2.504	57.526	58.093	1.043	1.041	17.777	17.963	7.448	7.446
21.751	21.865	1.43	1.431	2.504	2.515	60.48	61.081	1.04	1.039	1.007	1.005	22.944	22.939
35.522	35.759	1.414	1.414	5.654	5.78	58.597	59.174	1.335	1.334	26.272	26.599	23.411	23.406
23.762	24.176	1.755	1.757	4.395	4.485	53.369	53.886	1.389	1.388	19.685	19.92	24.11	24.102
5.957	6.024	1.781	1.784	4.345	4.435	60.962	61.586	0.956	0.955	17.291	17.492	23.841	23.834
3.334	3.39	14.694	14.744	4.967	5.085	81.669	82.515	1.261	1.258	20.636	20.885	19.955	19.939
1.679	1.69	14.865	14.917	5.072	5.224	76.192	76.956	1.452	1.45	22.028	22.296	19.445	19.429
44.813	45.205	3.978	3.996	5.227	5.365	66.855	67.515	0.99	0.99	22.899	23.18	20.044	20.029
36.121	36.362	3.868	3.884	4.978	5.111	69.279	70.005	0.967	0.966	26.036	26.355	20.016	20
8.12	8.184	1.085	1.085	5.006	5.024	71.287	72.029	0.975	0.974	15.849	16.034	2.891	2.894
3.38	3.413	1.07	1.07	4.923	4.944	86.028	86.918	1.487	1.484	11.986	12.098	2.794	2.798
36.288	36.538	1.194	1.194	5.074	5.089	71.686	72.435	1.224	1.223	17.11	17.301	2.861	2.865
13.476	13.592	1.289	1.29	5.108	5.122	14.739	14.839	1.062	1.062	28.415	28.769	2.764	2.768
3.249	3.253	1.269	1.27	3.169	3.229	17.524	17.641	1.845	1.842	16.959	17.159	11.381	11.373
25.579	25.734	1.253	1.254	3.253	3.317	16.011	16.118	1.783	1.783	18.906	19.128	11.555	11.546
2.735	2.749	1.297	1.298	3.296	3.364	22.864	23.025	5.414	5.423	2.24	2.202	11.124	11.115
1.617	1.628	4.429	4.44	2.627	2.653	14.213	14.308	5.151	5.156	2.489	2.451	12.096	12.086
8.927	9.019	4.375	4.385	2.663	2.69	14.596	14.7	5.072	5.074	0.951	0.935	12.346	12.337
13.967	14.131	4.358	4.369	2.667	2.693	14.595	14.699	5.604	5.612	2.269	2.228	10.68	10.671
9.388	9.568	4.569	4.579	2.645	2.671	15.957	16.071	5.621	5.632	2.113	2.075	2.214	2.216
6.875	7.069	1.821	1.824	3.954	4.081	13.986	14.085	5.99	6.036	1.264	1.232	2.197	2.198
10.566	10.841	1.81	1.813	3.991	4.124	4.621	4.652	4.532	4.553	1.31	1.277	2.359	2.361
9.947	10.144	1.828	1.831	3.942	4.068	4.542	4.573	4.287	4.308	1.149	1.117	2.244	2.246
10.733	11.029	1.804	1.808	4.019	4.152	4.783	4.815	3.371	3.37	1.062	1.041	2.124	2.125
9.487	9.717	3.677	3.685	3.96	4.085	4.422	4.452	3.366	3.364	1.325	1.324	6.556	6.555
9.529	9.786	3.699	3.707	3.258	3.251	33.857	34.19	2.701	2.699	1.572	1.578	6.846	6.844
11.038	11.403	3.716	3.725	3.269	3.263	20.829	21.018	2.641	2.637	1.629	1.636	1.654	1.659
8.012	8.263	3.387	3.395	3.197	3.191	1.718	1.725	5.221	5.239	1.561	1.566	1.674	1.679
8.12	8.364	3.485	3.494	3.171	3.165	37.557	37.935	5.182	5.2	1.616	1.622	1.69	1.695
10.146	10.444	3.383	3.391	2.197	2.211	26.6	26.853	5.361	5.384	1.622	1.628	1.673	1.678
8.665	8.861	3.449	3.457	2.208	2.222	33.724	34.056	5.21	5.229	2.114	2.122	14.448	14.437
12.586	12.718	3.02	3.028	2.193	2.207	33.679	34.013	2.613	2.607	2.074	2.081	14.486	14.475
13.169	13.314	1.509	1.511	28.58	28.855	30.402	30.7	2.905	2.899	2.407	2.419	13.915	13.904
13.061	13.205	1.648	1.65	27.539	27.803	34.087	34.451	2.785	2.779	2.212	2.221	16.657	16.645
12.843	12.98	1.707	1.709	28.792	29.068	35.278	35.627	2.72	2.714	2.162	2.171	23.77	23.757
13.094	13.231	1.393	1.394	29.646	29.926	21.056	21.25	3.082	3.075	1.885	1.892	24.011	23.998
12.798	12.933	1.389	1.39	28.955	29.234	17.855	17.988	1.16	1.158	2.063	2.07	23.912	23.899
13.743	13.902	1.384	1.384	1.389	1.407	27.484	27.702	1.199	1.197	27.25	27.59	23.759	23.746
14.187	14.334	17.906	17.97	1.559	1.576	21.3	21.453	1.193	1.191	25.778	26.099	15.451	15.437
14.527	14.675	19.968	20.042	1.527	1.543	27.239	27.445	1.245	1.242	28.466	28.823	14.563	14.55
28.199	28.399	3.726	3.737	1.473	1.49	25.268	25.468	0.781	0.781	28.859	29.222	13.978	13.966
19.858	20.001	7.24	7.257	2.947	2.99	26.442	26.643	5.324	5.393	3.51	3.54	14.22	14.208
19.705	19.885	5.891	5.905	2.909	2.953	28.841	29.063	5.093	5.151	3.663	3.695	11.937	11.929
27.077	27.275	14.085	14.137	2.941	2.985	9.765	9.821	4.661	4.706	7.207	7.277	10.989	10.982
10.736	10.839	5.163	5.175	2.998	3.042	11.981	12.05	4.857	4.91	8.302	8.383	11.33	11.322
21.968	22.242	5.611	5.624	29.209	29.488	15.858	15.953	1.791	1.79	1.303	1.311	11.386	11.378
18.918	19.132	5.847	5.86	29.692	29.977	10.816	10.878	1.885	1.884	1.383	1.392	8.591	8.585
22.185	22.458	7.039	7.058	28.05	28.313	19.43	19.605	1.834	1.833	1.375	1.384	8.725	8.719
20.949	21.207	5.66	5.675	7.726	7.845	13.811	13.925	1.66	1.66	1.416	1.426	8.699	8.693
20.429	20.675	6.789	6.807	8.06	8.181	14.9	15.025	1.524	1.524	12.459	12.56	8.548	8.543
21.235	21.495	6.379	6.395	7.963	8.084	40.214	40.609	1.95	1.949	10.908	10.998	8.681	8.675
20.28	20.538	5.995	6.01	7.672	7.791	39.342	39.73	1.616	1.616	12.954	13.059	1.339	1.341
28.209	28.426	6.707	6.724	14.963	15.101	39.902	40.295	1.882	1.882	12.621	12.724	1.373	1.375
28.783	29.005	6.832	6.849	15.472	15.613	36.027	36.37	0.712	0.712	11.442	11.536	1.415	1.417
28.172	28.388	7.889	7.912	28.477	28.75	33.475	33.794	1.189	1.188	11.301	11.394	1.405	1.407
27.843	28.056	8.898	8.899	28.38	28.655	21.576	21.713	1.206	1.204	13.609	13.72	1.464	1.466
28.589	28.81	8.729	8.73	35.363	35.56	17.503	17.617	1.196	1.194	13.248	13.357	4.03	4.028
27.508	27.717	7.866	7.866	34.938	35.135	20.281	20.41	1.195	1.193	9.709	9.807	3.814	3.812
14.847	14.97	8.279	8.279	34.563	34.757	7.953	7.997	1.017	1.015	9.937	10.037	3.81	3.809
17.198	17.325	7.881	7.881	33.705	33.901	5.909	5.943	1.002	1	10.466	10.572	3.747	3.745
15.953	16.077	7.322	7.322	8.142	8.214	6.907	6.944	1.008	1.006	11.014	11.126	1.51	1.511
15.902	16.026	5.59	5.591	8.709	8.785	2.823	2.837	0.936	0.935	1.084	1.084	1.49	1.492
15.177	15.298	9.172	9.172	8.483	8.557	2.965	2.981	0.94	0.938	1.092	1.092	1.497	1.499
31.483	31.791	8.728	8.728	0.563	0.568	2.966	2.981	1.893	1.889	1.07	1.07	1.51	1.512
31.525	31.833	8.838	8.839	0.562	0.567	3.196	3.215	1.918	1.913	1.567	1.579	7.711	7.707
31.038	31.34	5.987	6.002	6.31	6.378	3.257	3.277	1.895	1.891	1.245	1.243	7.563	7.559
31.369	31.677	6.002	6.016	7.261	7.352	3.316	3.336	1.885	1.88	1.299	1.298	7.67	7.666
11.815	11.954	5.356	5.369	7.207	7.301	1.922	1.928	1.825	1.822	1.732	1.744	7.938	7.934
11.504	11.639	5.643	5.656	7.114	7.207	1.968	1.975	1.649	1.648	1.54	1.548	7.784	7.78
11.346	11.482	5.597	5.61	7.122	7.214	1.794	1.799	1.521	1.519	0.756	0.759	0.411	0.412
11.898	12.038	3.749	3.757	7.082	7.171	14.601	14.734	1.443	1.441	0.765	0.768	0.409	0.41
11.606	11.745	2.623	2.627	3.813	3.824	17.908	18.062	1.384	1.382	0.729	0.732	0.409	0.41
11.735	11.872	4.988	4.999	3.662	3.676	17.298	17.446	1.378	1.376	0.978	0.983	0.725	0.725
2.89	2.925	5.195	5.207	3.737	3.75	14.858	14.983	1.522	1.519	0.656	0.657	0.721	0.721
2.925	2.96	5.7	5.714	3.288	3.299	17.131	17.278	1.369	1.367	1.37	1.374	1.006	1.006
2.921	2.956	6.491	6.457	3.268	3.279	17.944	18.09	2.371	2.373	1.267	1.271	1.055	1.055
2.947	2.983	6.344	6.311	14.195	14.307	18.064	18.221	2.622	2.624	1.192	1.195	1.055	1.055
2.602	2.633	7.735	7.712	14.29	14.403	17.638	17.795	2.519	2.521	2.049	2.064	1.054	1.054
5.676	5.731	7.013	6.979	14.195	14.308	16.641	16.79	2.306	2.308	2.511	2.531	1.059	1.059
4.136	4.173	7.6	7.566	14.483	14.599	13.042	13.156	1.225	1.225	2.36	2.379	3.749	3.747
5.138	5.187	7.212	7.178	14.151	14.263	4.931	4.951	1.217	1.217	2.608	2.63	3.867	3.866
3.477	3.507	7.487	7.453	7.129	7.223	5.098	5.119	1.21	1.211	1.375	1.383	3.964	3.962
3.731	3.764	7.275	7.241	6.574	6.662	3.956	3.971	0.88	0.881	1.293	1.3	3.909	3.908
10.03	10.163	6.915	6.881	6.554	6.642	3.345	3.36	0.888	0.888	1.289	1.296	4.603	4.601
10.52	10.669	7.279	7.246	6.685	6.773	3.256	3.268	0.876	0.877	1.282	1.289	9.932	9.934
10.224	10.366	5.822	5.789	6.582	6.669	4.098	4.114	1.278	1.276	1.796	1.802	9.749	9.751
10.468	10.606	7.172	7.138	4.517	4.566	1.801	1.803	1.254	1.252	1.736	1.742	9.658	9.66
13.826	13.941	6.961	6.966	4.843	4.895	3.065	3.066	1.247	1.245	1.749	1.755	9.385	9.387
13.538	13.649	6.83	6.836	4.553	4.602	2.264	2.264	6.717	6.786	1.029	1.034	1.691	1.7
13.58	13.692	7.011	7.017	4.88	4.932	3.496	3.522	6.446	6.51	0.986	0.99	1.709	1.717
19.79	19.977	7.099	7.104	4.978	5.03	3.49	3.516	6.498	6.563	1.549	1.512	4.378	4.376
19.655	19.841	7.56	7.561	1.857	1.868	3.431	3.457	1.079	1.078	1.55	1.513	4.243	4.241
19.801	19.989	6.344	6.344	1.894	1.906	3.573	3.6	1.055	1.053	0.985	0.991	4.843	4.843
25.065	25.357	7.262	7.263	1.916	1.928	3.433	3.459	1.2	1.198	1.416	1.416	4.942	4.941
25.761	26.055	7.434	7.435	1.89	1.901	3.468	3.494	1.543	1.541	1.093	1.095	1.493	1.494
25.554	25.852	5.418	5.424	1.82	1.831	3.325	3.35	1.573	1.571	1.053	1.052	1.347	1.345
25.261	25.551	5.695	5.701	5.517	5.539	3.482	3.508	1.561	1.559	1.065	1.065	0.414	0.413
19.289	19.499	5.052	5.057	5.517	5.539	3.528	3.554	1.408	1.408	0.706	0.708	0.405	0.404
19.138	19.347	7.97	7.98	5.504	5.528	6.692	6.675	1.279	1.279	0.707	0.708	1.324	1.323
17.75	17.947	8.052	8.062	5.835	5.86	6.726	6.716	1.325	1.325	3.307	3.339	1.338	1.337
8.084	8.162	8.055	8.066	5.517	5.54	6.575	6.565	1.437	1.436	3.332	3.364	1.564	1.564
9.53	9.629	8.065	8.075	1.303	1.313	6.742	6.735	9.745	9.937	1.725	1.739	1.538	1.538
18.307	18.507	5.737	5.747	1.239	1.248	6.68	6.673	9.653	9.839	1.726	1.74	1.527	1.526
14.716	14.877	5.381	5.389	1.288	1.297	6.736	6.725	9.549	9.733	1.291	1.295	0.851	0.85
19.569	19.786	6.042	6.052	28.48	28.753	6.665	6.655	1.598	1.597	1.573	1.58	0.877	0.877
12.42	12.547	5.385	5.393	7.656	7.775	6.661	6.644	1.693	1.691	1.378	1.382	0.506	0.505
6.507	6.633	5.279	5.286	4.95	4.97	9.174	9.081	1.669	1.667	0.745	0.738	0.518	0.517
6.708	6.842	5.276	5.283	11.383	12.112	13.483	13.271	1.601	1.599	0.739	0.732	1.05	1.05
6.819	6.958	4.383	4.388	3.841	3.911	10.32	10.162	2.765	2.763	0.648	0.652	1.041	1.041
6.774	6.91	4.752	4.763	5.891	6.109	9.227	9.094	1.762	1.761	0.941	0.922	6.465	6.462
6.483	6.615	4.365	4.375	3.269	3.335	11.516	11.338	1.751	1.75	0.934	0.915	5.87	5.868
6.707	6.841	3.558	3.567	9.946	10.046	9.901	9.747	2.228	2.227	0.363	0.36	5.93	5.927
6.754	6.889	4.142	4.152	9.713	9.808	9.194	9.069	2.609	2.607	0.961	0.93	3.531	3.53
6.488	6.613	3.638	3.647	9.479	9.57	15.513	15.259	2.848	2.847	0.569	0.568	3.645	3.644
9.565	9.701	5.165	5.178	5.602	5.705	14.167	13.944	3.034	3.032	0.465	0.457	0.361	0.361
7.847	7.959	2.359	2.361	4.277	4.389	2.166	2.173	2.614	2.613	0.299	0.297	0.369	0.368
11.406	11.567	2.751	2.754	27.59	27.854	2.245	2.252	3.226	3.225	0.148	0.147	2.093	2.092
8.739	8.864	2.757	2.76	24.549	24.757	2.1	2.106	2.384	2.383	0.129	0.128	1.972	1.971
9.548	9.684	2.584	2.587	10.095	10.693	2.087	2.094	0.859	0.859	0.528	0.529	0.505	0.505
11.003	11.159	2.398	2.4	19.862	20.388	5.399	5.386	0.883	0.883	1.01	1.012	0.513	0.513
1.798	1.812	2.532	2.535	22.074	22.599	5.462	5.448	3.988	4.017	0.978	0.98	0.353	0.353
1.654	1.666	7.592	7.601	24.551	25.054	5.41	5.397	3.897	3.923	0.951	0.952	0.354	0.354
1.156	1.163	7.353	7.362	29.443	30.012	2.869	2.88	4.485	4.524	1.197	1.19	0.974	0.974
1.235	1.244	6.662	6.67	17.208	17.727	2.957	2.967	4.054	4.084	1.014	1.01	1	0.999
1.553	1.565	7.499	7.508	17.158	17.671	2.84	2.852	1.809	1.807	1.142	1.139	0.113	0.113
9.327	9.509	7.113	7.121	23.507	24.113	2.917	2.928	1.509	1.509	1.023	1.023	0.114	0.113
8.293	8.454	4.952	4.961	20.028	20.569	5.818	5.851	1.767	1.766	1.412	1.418	0.215	0.215
7.904	8.057	4.838	4.847	35.746	36.237	5.907	5.941	1.398	1.398	1.31	1.315	0.213	0.213
8.543	8.709	3.894	3.9	27.074	27.232	5.683	5.715	1.403	1.403	2.521	2.52	0.151	0.151
8.755	8.925	5.262	5.271	29.642	29.812	6.255	6.268	1.508	1.508	2.526	2.524	0.147	0.147
7.975	8.13	4.405	4.413	29.984	30.157	6.262	6.275	1.848	1.847	0.68	0.68	0.136	0.136
8.445	8.53	5.24	5.251	28.712	28.877	6.27	6.284	1.742	1.741	0.667	0.666	0.136	0.136
8.542	8.629	5.47	5.464	25.467	25.618	4.306	4.319	1.794	1.793	2.372	2.378	0.185	0.185
9.592	9.691	5.431	5.426	35.662	35.867	4.317	4.33	1.791	1.79	1.739	1.746	0.185	0.185
8.464	8.55	5.385	5.38	29.356	29.526	4.052	4.066	1.346	1.346	1.697	1.703	0.201	0.201
8.222	8.305	4.671	4.672	25.18	25.328	6.636	6.639	1.343	1.343	0.676	0.677	0.2	0.2
4.302	4.345	5.349	5.345	30.777	30.953	6.543	6.547	1.295	1.294	0.682	0.683	7.198	7.196
4.49	4.534	1.884	1.887	51.895	52.21	6.08	6.064	1.584	1.582	1.06	1.062	5.815	5.817
4.439	4.483	1.967	1.97	24.409	24.548	6.549	6.545	1.632	1.63	1.077	1.079	1.474	1.475
4.403	4.447	2.035	2.038	20.495	20.606	6.724	6.723	1.284	1.283	1.118	1.119	4.986	4.984
4.35	4.394	2.169	2.173	24.591	24.73	6.718	6.721	1.235	1.234	1.436	1.44	4.23	4.228
4.55	4.596	1.795	1.798	21.877	21.995	3.511	3.522	2.323	2.321	1.5	1.505	8.578	8.573
20.675	20.945	2.446	2.442	24.936	25.073	4.553	4.568	2.151	2.148	1.454	1.459	1.458	1.459
17.178	17.406	3.103	3.104	23.618	23.75	3.685	3.698	2.243	2.24	0.844	0.843	1.484	1.485
21.535	21.816	2.348	2.348	24.516	24.652	5.426	5.457	1.819	1.818	0.836	0.835	8.956	8.954
23.335	23.64	3.404	3.408	25.074	25.21	3.284	3.293	1.789	1.788	1.486	1.486	9.583	9.581
20.58	20.849	2.639	2.641	22.466	22.587	4.026	3.961	2.237	2.238	1.53	1.53	5.734	5.734
17.893	18.127	8.711	8.713	22.597	22.722	3.899	3.832	2.291	2.291	1.474	1.472	19.653	19.637
2.287	2.304	8.815	8.817	18.94	19.072	4.003	3.939	4.575	4.567	0.629	0.63	20.057	20.041
2.27	2.285	4.061	4.065	18.316	18.449	3.765	3.701	1.186	1.184	0.586	0.586	5.798	5.796
2.261	2.278	4.003	4.007	18.67	18.797	4.152	4.094	1.561	1.559	0.595	0.595	0.672	0.672
2.011	2.019	3.92	3.923	18.172	18.31	3.739	3.68	4.273	4.262	1.598	1.612	9.951	9.953
16.178	16.334	3.97	3.974	20.04	20.166	5.83	5.814	4.125	4.114	1.657	1.672	9.718	9.72
17.107	17.272	4.01	4.014	20.047	20.189	5.774	5.758	3.729	3.721	2.28	2.289	9.841	9.843
17.652	17.821	6.313	6.325	21.455	21.597	5.785	5.769	3.351	3.343	1.459	1.469	9.522	9.524
17.639	17.809	6.992	7.006	20.866	21.009	5.811	5.794	3.776	3.769	0.606	0.609	0.136	0.136
15.129	15.279	6.92	6.934	20.298	20.44	5.419	5.403	1.783	1.779	1.574	1.58	9.744	9.742
13.061	13.188	6.961	6.975	20.632	20.775	7.296	7.302	4.173	4.162	1.576	1.582	5.284	5.286
3.968	4.014	6.077	6.094	19.528	19.669	7.596	7.599	2.178	2.174	1.594	1.599	11.262	11.254
3.979	4.025	5.891	5.908	22.515	22.656	7.706	7.708	4.097	4.087	0.975	0.97	11.456	11.448
4.145	4.192	5.937	5.953	9.747	9.807	5.588	5.575	0.828	0.828	0.981	0.985	18.206	18.2
3.885	3.93	5.64	5.654	33	33.346	5.62	5.608	1.586	1.586	1.267	1.235	0.965	0.964
3.702	3.744	4.338	4.342	33.794	34.148	5.584	5.572	1.58	1.579	0.986	0.955	1.487	1.488
7.596	7.678	4.52	4.524	33.751	34.106	2.244	2.238	1.925	1.925	24.27	24.571	1.497	1.499
8.165	8.254	4.437	4.441	33.55	33.909	2.208	2.201	2.14	2.141	1.085	1.085	28.441	28.424
8.301	8.391	4.018	4.022	33.542	33.905	2.112	2.106	1.427	1.427	14.076	14.264	22.744	22.732
8.814	8.949	6.738	6.759	33.542	33.899	4.137	4.089	1.661	1.66	10.657	10.793	28.938	28.922
8.716	8.848	6.308	6.327	33.795	34.157	3.547	3.497	2.112	2.113	9.485	9.603	27.202	27.189
8.803	8.937	6.247	6.265	21.483	21.675	3.494	3.452	1.158	1.159	11.072	11.215	26.16	26.146
8.497	8.623	1.811	1.815	22.66	22.867	4.898	4.896	1.297	1.297	11.858	12.012	19.384	19.374
6.234	6.351	1.808	1.811	22.882	23.088	5.125	5.114	1.409	1.408	12.235	12.395	24.712	24.7
5.723	5.828	1.25	1.251	23.118	23.324	5.004	4.996	1.801	1.799	14.167	14.353	14.161	14.153
5.172	5.265	1.237	1.238	22.833	23.043	5.039	5.017	1.768	1.769	8.324	8.428	19.377	19.365
2.945	2.962	1.569	1.572	7.815	8.086	6.08	6.064	1.537	1.538	9.047	9.148	22.97	22.959
2.901	2.918	1.576	1.579	7.456	7.712	6.395	6.372	2.594	2.593	9.629	9.743	19.42	19.409
2.525	2.549	6.003	5.975	7.607	7.874	6.203	6.184	2.013	2.014	15.319	15.523	27.18	27.167
2.324	2.346	5.752	5.725	8.157	8.431	13.263	13.383	4.341	4.339	9.136	9.251	18.274	18.264
2.448	2.471	2.005	2.007	35.287	35.575	13.575	13.698	4.413	4.409	10.356	10.485	26.638	26.626
6.329	6.346	1.986	1.989	35.62	35.916	13.064	13.182	4.395	4.39	2.749	2.782	28.05	28.036
6.366	6.383	1.978	1.98	36.609	36.929	13.682	13.807	3.823	3.819	2.706	2.739	11.971	11.963
6.327	6.344	1.917	1.919	34.947	35.226	30.311	30.625	3.836	3.833	3.609	3.639	11.365	11.358
0.947	0.951	2.403	2.406	4.697	4.882	27.807	28.093	4.985	5.003	2.455	2.484	10.939	10.933
0.937	0.941	2.478	2.485	4.634	4.814	30.958	31.278	4.902	4.925	2.729	2.762	7.944	7.94
1.767	1.782	2.508	2.514	4.702	4.888	29.908	30.218	4.81	4.834	1.221	1.227	11.519	11.513
1.47	1.48	2.523	2.529	4.968	5.168	28.338	28.628	3.536	3.534	1.207	1.214	9.661	9.656
1.246	1.254	2.468	2.475	10.824	11.016	5.776	5.849	3.538	3.536	1.215	1.221	10.038	10.032
3.514	3.572	3.557	3.564	10.434	10.616	6.063	6.145	3.353	3.352	1.034	1.035	12.303	12.296
3.602	3.663	3.596	3.604	10.578	10.763	6.204	6.29	3.41	3.408	2.866	2.876	11.234	11.228
1.106	1.108	3.869	3.878	10.309	10.488	5.488	5.551	3.739	3.744	4.144	4.177	5.852	5.849
1.13	1.133	3.214	3.22	3.765	3.784	5.33	5.391	3.723	3.728	4.126	4.158	3.858	3.858
0.97	0.973	3.732	3.742	4.118	4.139	5.515	5.581	3.797	3.804	3.815	3.842	3.361	3.361
0.714	0.715	3.862	3.872	4.711	4.737	5.668	5.741	3.736	3.741	4.178	4.212	4.01	4.01
0.704	0.706	3.714	3.724	3.833	3.851	5.109	5.161	1.777	1.775	4.064	4.095	3.999	4
1.506	1.519	3.936	3.946	3.921	3.942	5.691	5.684	2.074	2.072	2.171	2.188	2.159	2.16
1.53	1.542	2.861	2.862	11.242	11.326	5.664	5.656	1.948	1.946	1.982	1.997	2.624	2.625
1.549	1.562	2.809	2.81	11.185	11.268	6.12	6.116	1.917	1.915	2.751	2.772	3.841	3.841
3.544	3.548	2.109	2.111	11.419	11.504	6.12	6.116	2.27	2.267	2.376	2.395	3.366	3.367
3.542	3.545	2.347	2.352	16.761	16.864	10.177	9.999	1.142	1.143	2.18	2.197	3.084	3.084
9.718	9.818	2.7	2.705	17.39	17.5	10.68	10.518	1.131	1.132	2.058	2.074	13.415	13.408
26.612	26.817	2.369	2.374	17.398	17.509	4.756	4.693	1.118	1.119	2.249	2.263	13.749	13.742
17.577	17.723	2.428	2.432	18.264	18.381	4.569	4.507	1.533	1.532	15.532	15.741	11.676	11.67
12.643	12.776	2.297	2.302	16.638	16.741	11.256	11.091	1.136	1.137	15.035	15.237	13.579	13.573
20.751	21.002	3.723	3.733	17.203	17.313	11.774	11.593	5.841	5.915	15.865	16.079	13.309	13.302
7.567	7.647	2.971	2.978	12.654	12.727	5.424	5.376	5.623	5.684	15.753	15.965	13.109	13.102
8.798	8.934	3.546	3.555	12.423	12.495	4.595	4.569	5.437	5.493	8.162	8.264	12.462	12.456
2.895	2.912	1.771	1.771	12.352	12.424	4.631	4.612	5.55	5.611	8.525	8.631	0.367	0.367
10.144	10.282	1.777	1.777	12.41	12.482	4.621	4.602	1.478	1.476	7.965	8.065	0.38	0.379
12.813	12.949	1.784	1.784	12.784	12.857	3.078	3.023	1.529	1.527	8.38	8.484	0.375	0.375
8.58	8.747	7.573	7.541	3.379	3.391	3.035	2.978	1.5	1.498	3.92	3.99	0.356	0.356
4.27	4.313	7.273	7.243	3.314	3.326	4.556	4.537	1.399	1.397	4.176	4.252	0.377	0.377
13.151	13.295	4.253	4.259	3.626	3.641	4.526	4.507	1.315	1.313	4.171	4.247	0.367	0.366
3.592	3.652	6.676	6.692	3.068	3.08	3.587	3.575	1.566	1.563	4.259	4.338	1.609	1.61
1.169	1.171	5.443	5.457	23.427	23.572	3.579	3.567	1.384	1.382	8.471	8.598	4.506	4.503
19.45	19.631	7.134	7.1	12.892	13.006	3.376	3.347	1.522	1.519	7.641	7.754	4.291	4.288
2.028	2.037	3.111	3.117	12.06	12.166	4.259	4.212	0.912	0.912	8.602	8.731	3.583	3.581
0.977	0.982	3.854	3.861	12.498	12.608	6.628	6.521	1.013	1.013	8.464	8.59	2.314	2.317
2.941	2.976	4.249	4.255	12.423	12.533	6.942	6.826	1.02	1.019	8.158	8.28	2.327	2.33
18.996	19.204	5.442	5.45	5.728	5.814	5.188	5.108	1.025	1.024	10.505	10.668	2.37	2.373
114.267	114.908	3.785	3.792	5.723	5.809	5.073	4.996	1.021	1.02	8.902	9.036	2.346	2.349
64.188	64.847	5.047	5.056	6.091	6.18	46.288	46.667	1.114	1.113	9.04	9.177	18.731	18.707
109.804	110.638	4.726	4.733	5.286	5.366	46.493	46.872	1.096	1.095	7.791	7.874	18.553	18.53
109.46	110.103	4.266	4.273	21.006	21.206	47.341	47.718	1.102	1.101	7.709	7.792	18.445	18.421
110.215	111.105	5.022	5.031	18.843	19.042	42.979	43.27	1.004	1.004	7.815	7.9	18.959	18.935
116.011	116.809	5.187	5.195	18.785	18.985	39.202	39.465	1.033	1.033	8.116	8.205	16.672	16.65
116.152	117.045	5.89	5.899	27.151	27.52	58.042	58.499	2.485	2.483	0.565	0.564	20.245	20.219
54.138	54.624	10.477	10.489	28.374	28.709	59.656	60.141	2.496	2.494	0.567	0.566	3.939	3.937
46.064	46.476	10.646	10.659	28.728	29.124	58.862	59.33	2.507	2.505	0.557	0.556	4.216	4.215
84.653	85.499	10.427	10.438	27.443	27.792	86.905	87.703	2.294	2.293	0.801	0.802	3.827	3.826
122.705	123.735	10.11	10.12	12.456	12.587	85.7	86.486	2.444	2.442	3.269	3.286	3.771	3.77
109.957	110.608	10.074	10.083	12.596	12.731	27.846	28.042	1.946	1.947	3.051	3.065	11.784	11.773
15.629	15.755	10.594	10.605	12.445	12.574	27.184	27.374	5.733	5.726	2.884	2.907	12.196	12.184
15.585	15.709	10.757	10.77	12.428	12.555	46.126	46.539	5.265	5.258	2.731	2.75	12.736	12.723
15.744	15.871	9.513	9.524	3.322	3.419	47.292	47.72	4.916	4.91	1.121	1.125	12.594	12.581
15.543	15.667	8.867	8.875	3.464	3.571	74.796	75.521	4.881	4.875	1.13	1.135	19.507	19.486
15.335	15.457	8.348	8.353	3.513	3.624	73.518	74.238	5.727	5.72	1.081	1.083	19.251	19.231
15.457	15.581	13.059	13.025	3.361	3.432	76.789	77.526	4.832	4.826	1.17	1.178	19.591	19.571
15.472	15.595	12.451	12.416	3.235	3.306	40.219	40.601	3.218	3.217	1.171	1.172	19.898	19.877
14.791	14.908	10.494	10.463	3.22	3.291	40.394	40.776	4.035	4.036	1.536	1.547	2.7	2.702
14.649	14.765	12.345	12.313	3.301	3.372	48.275	48.721	4.136	4.138	1.456	1.466	2.684	2.686
8.57	8.629	11.755	11.722	5.88	6.065	48.135	48.574	4.283	4.286	1.391	1.4	2.714	2.715
10.352	10.431	8.463	8.443	5.403	5.583	32.673	32.971	1.192	1.194	3.712	3.724	2.734	2.736
12.216	12.309	4.143	4.136	5.733	5.91	25.903	26.141	1.189	1.191	4.003	4.012	14.369	14.347
7.804	7.857	11.887	11.862	5.656	5.851	23.422	23.601	1.174	1.176	3.927	3.938	14.951	14.928
15.164	15.289	9.736	9.705	6.201	6.4	24.545	24.733	1.443	1.444	4.002	4.011	14.918	14.895
40.918	41.388	10.47	10.436	5.892	5.93	8.094	8.156	1.445	1.446	2.22	2.247	15.964	15.939
49.269	49.809	3.789	3.786	5.796	5.832	6.98	7.032	1.437	1.438	2.248	2.276	15.586	15.562
48.781	49.347	3.969	3.965	6.028	6.069	8.158	8.223	1.132	1.133	2.25	2.278	14.653	14.63
40.435	40.898	3.483	3.481	6.19	6.233	7.513	7.571	1.117	1.118	2.259	2.288	2.015	2.019
43.374	43.871	4.372	4.368	5.901	5.98	2.096	2.106	1.112	1.114	3.118	3.134	2.007	2.011
44.269	44.778	6.057	6.051	5.891	5.97	2.048	2.057	1.835	1.838	3.062	3.079	2.112	2.116
33.96	34.348	5.168	5.163	5.837	5.915	4.555	4.583	1.874	1.877	3.083	3.1	2.014	2.017
9.925	10.007	5.553	5.548	10.891	10.988	3.953	3.976	1.888	1.892	2.283	2.313	2.01	2.014
10.135	10.218	4.984	4.979	10.167	10.257	1.183	1.183	0.961	0.961	2.383	2.414	4.398	4.398
9.919	10.001	4.438	4.434	10.89	10.987	1.09	1.091	0.939	0.939	1.055	1.062	4.834	4.834
9.819	9.9	3.547	3.546	11.893	11.996	1.083	1.084	1.088	1.087	1.053	1.06	1.983	1.991
10.072	10.155	4.334	4.325	11.117	11.216	37.172	37.286	1.841	1.843	1.901	1.913	1.985	1.993
9.682	9.761	4.264	4.261	2.319	2.344	35.72	35.83	1.939	1.941	2.053	2.069	1.991	1.998
6.145	6.162	7.956	7.937	2.526	2.552	32.976	33.079	1.91	1.912	1.898	1.911	1.985	1.992
7.708	7.721	7.695	7.675	2.497	2.523	37.084	37.2	1.551	1.553	0.575	0.572	7.608	7.598
6.35	6.364	7.97	7.95	2.401	2.427	36.151	36.261	1.337	1.339	0.583	0.58	7.348	7.339
6.416	6.431	7.94	7.919	9.133	9.255	32.693	32.797	1.427	1.43	0.69	0.683	7.819	7.809
5.733	5.748	13.172	13.17	8.92	9.041	23.475	23.579	1.602	1.604	0.699	0.692	6.609	6.601
33.151	33.4	14.361	14.358	8.877	8.999	17.379	17.446	7.052	7.174	6.346	6.428	14.886	14.873
32.979	33.228	13.571	13.569	9.232	9.355	21.222	21.318	6.997	7.118	6.449	6.532	14.74	14.727
32.505	32.748	13.349	13.347	12.569	12.672	20.289	20.379	6.984	7.105	0.907	0.908	14.862	14.849
33.138	33.387	6.389	6.363	12.559	12.664	19.576	19.659	0.989	0.988	0.907	0.909	14.954	14.941
60.533	61.067	6.537	6.513	13.143	13.243	18.529	18.604	1.174	1.172	7.654	7.761	10.724	10.713
59.787	60.321	5.368	5.344	12.367	12.478	8.1	8.149	1.158	1.156	7.943	8.055	12.073	12.06
59.401	59.939	4.189	4.181	12.185	12.293	7.293	7.339	1.156	1.154	7.981	8.094	11.746	11.733
60.201	60.732	3.843	3.835	12.714	12.829	7.71	7.758	1.591	1.59	4.101	4.118	11.675	11.662
59.644	60.177	4.08	4.072	12.267	12.377	8.261	8.35	1.473	1.472	4.184	4.202	18.784	18.768
60.295	60.829	3.733	3.725	19.437	19.579	7.963	8.05	1.415	1.414	1.568	1.569	18.769	18.754
4.343	4.419	4.782	4.785	21.491	21.643	8.257	8.347	1.525	1.524	2.769	2.792	18.663	18.648
4.429	4.507	4.849	4.85	12.254	12.349	7.142	7.224	1.823	1.823	2.713	2.736	18.509	18.493
4.38	4.457	4.746	4.749	11.733	11.824	7.973	8.058	1.996	1.998	1.461	1.469	31.906	31.857
4.534	4.615	5.042	5.041	17.428	17.555	8.646	8.737	2.117	2.118	0.796	0.8	29.563	29.525
3.81	3.875	5.079	5.078	17.003	17.127	6.477	6.586	1.848	1.849	0.709	0.707	29.841	29.802
8.192	8.269	4.807	4.809	19.986	20.129	7.519	7.649	2.237	2.239	0.695	0.7	30.214	30.172
7.725	7.803	4.046	4.052	18.684	18.819	7.505	7.631	1.689	1.689	0.556	0.549	29.393	29.356
8.019	8.096	3.006	3.012	9.618	9.698	8.003	8.139	0.571	0.573	0.153	0.152	1.972	1.972
7.585	7.665	2.675	2.68	10.031	10.116	2.33	2.348	0.582	0.583	0.105	0.104	2.016	2.016
7.626	7.705	2.502	2.507	9.915	9.998	2.33	2.348	2.527	2.541	0.484	0.485	2.099	2.1
37.433	37.698	2.749	2.755	1.483	1.487	2.41	2.429	2.48	2.492	4.007	4.039	2.071	2.071
40.985	41.262	2.469	2.474	1.456	1.46	63.929	64.496	2.829	2.851	4.002	4.033	2.201	2.201
41.01	41.29	3.182	3.189	8.672	8.758	60.95	61.486	2.555	2.57	3.987	4.018	6.251	6.244
34.638	34.884	2.496	2.498	9.781	9.881	63.239	63.799	1.483	1.481	1.363	1.369	5.782	5.775
17.66	17.834	2.582	2.584	9.238	9.329	13.902	13.978	1.289	1.288	1.538	1.55	5.76	5.753
18.979	19.165	2.644	2.646	8.837	8.922	13.51	13.584	1.461	1.46	1.712	1.724	5.637	5.63
18.619	18.801	2.624	2.626	9.11	9.2	9.689	9.728	1.281	1.28	2.76	2.788	2.768	2.766
28.881	29.182	2.61	2.612	9.32	9.412	10.161	10.201	1.281	1.28	3.033	3.066	2.707	2.706
28.569	28.871	2.498	2.5	5.808	5.844	10.165	10.205	1.374	1.373	2.871	2.901	2.74	2.738
28.551	28.851	4.115	4.106	5.194	5.229	7.154	7.23	1.851	1.852	1.514	1.523	2.772	2.77
36.466	36.829	4.53	4.521	5.445	5.481	7.339	7.418	1.841	1.843	1.491	1.499	6.305	6.3
35.167	35.508	4.484	4.474	4.898	4.929	7.434	7.513	1.848	1.849	1.223	1.228	6.205	6.2
37.361	37.733	4.128	4.119	4.703	4.734	7.437	7.516	1.823	1.824	1.085	1.088	6.441	6.436
34.956	35.296	3.955	3.946	14.199	14.264	12.178	12.24	2.454	2.465	2.51	2.519	6.675	6.67
4.365	4.41	6.69	6.701	13.727	13.791	12.385	12.448	2.522	2.534	2.013	2.028	6.607	6.602
4.338	4.383	6.661	6.674	13.473	13.536	6.013	6.091	2.485	2.495	1.967	1.981	0.305	0.305
4.087	4.13	6.631	6.64	14.023	14.087	6.231	6.312	1.283	1.281	0.866	0.868	0.324	0.324
5.305	5.368	6.637	6.648	13.73	13.794	6.036	6.114	1.344	1.342	0.878	0.879	0.33	0.33
5.053	5.113	6.566	6.577	2.499	2.512	8.714	8.781	0.483	0.483	0.812	0.811	0.526	0.526
4.39	4.436	6.067	6.081	2.475	2.487	8.958	9.027	0.472	0.472	0.816	0.816	0.523	0.523
4.546	4.596	2.749	2.744	2.474	2.486	8.46	8.526	1.299	1.298	1.118	1.117	0.971	0.971
4.142	4.184	2.717	2.713	2.496	2.507	2.364	2.373	1.204	1.203	1.438	1.441	0.954	0.954
4.953	5.009	2.672	2.668	2.488	2.499	2.358	2.368	1.245	1.245	1.502	1.506	0.915	0.916
3.223	3.243	2.839	2.838	3.899	3.92	2.574	2.582	1.24	1.238	1.454	1.457	0.926	0.926
3.182	3.203	2.662	2.659	4.224	4.248	2.446	2.453	1.21	1.208	0.84	0.842	0.929	0.929
3.186	3.209	1.339	1.34	3.939	3.96	2.302	2.311	1.615	1.616	0.837	0.839	7.716	7.719
3.11	3.13	1.395	1.397	4.192	4.215	0.553	0.553	1.588	1.588	1.378	1.38	8.07	8.074
3.218	3.243	1.415	1.417	4.408	4.435	0.577	0.578	3.873	3.863	1.425	1.428	8.384	8.388
3.225	3.248	1.581	1.584	2.756	2.775	0.55	0.551	1.076	1.076	1.348	1.35	8.176	8.18
3.045	3.063	1.31	1.311	2.76	2.779	0.651	0.652	1.909	1.911	1.021	1.021	7.827	7.831
3.255	3.276	1.391	1.392	2.77	2.789	1.395	1.398	NaN	NaN	0.486	0.486	2.756	2.757
7.985	8.05	3.559	3.562	2.771	2.79	1.339	1.342	NaN	NaN	0.504	0.504	2.779	2.78
6.642	6.694	1.818	1.819	2.719	2.737	1.334	1.337	NaN	NaN	2.002	2.023	2.836	2.837
9.473	9.551	4.233	4.238	7.997	8.04	1.332	1.335	NaN	NaN	2.086	2.108	2.815	2.816
7.314	7.373	2.562	2.564	7.997	8.04	0.825	0.827	NaN	NaN	2.59	2.606	2.253	2.259
7.984	8.049	10.066	10.077	7.972	8.016	0.823	0.825	NaN	NaN	0.748	0.748	2.244	2.25
9.01	9.083	9.99	10	8.144	8.185	0.812	0.814	NaN	NaN	1.355	1.357	4.413	4.413
1.705	1.712	5.464	5.439	7.971	8.014	0.798	0.8	NaN	NaN	4.199	4.234	4.416	4.415
1.655	1.661	5.88	5.852	2.681	2.696	2.74	2.752	NaN	NaN	4.139	4.172	1.444	1.445
1.324	1.329	6.545	6.511	2.756	2.773	2.854	2.866	NaN	NaN	3.95	3.98	1.545	1.546
1.38	1.386	6.15	6.119	2.738	2.754	2.899	2.911	NaN	NaN	0.903	0.908	1.312	1.313
1.592	1.598	5.779	5.751	12.256	12.351	5.828	5.878	NaN	NaN	2.4	2.432	1.269	1.271
7.458	7.598	4.122	4.129	12.236	12.346	5.013	5.055	NaN	NaN	1.223	1.23	0.695	0.694
6.951	7.08	4.287	4.295	12.569	12.703	4.752	4.791	NaN	NaN	0.962	0.966	0.762	0.761
6.773	6.898	4.266	4.274	33.736	34.092	4.442	4.479	NaN	NaN	14.632	14.829	1.438	1.438
7.088	7.221	4.279	4.287	10.738	10.928	5.182	5.226	NaN	NaN	0.565	0.564	1.454	1.454
7.174	7.306	2.678	2.681	34.66	35.009	1.316	1.323	NaN	NaN	NaN	NaN	0.796	0.797
6.793	6.918	2.635	2.637	3.492	3.601	1.661	1.671	NaN	NaN	NaN	NaN	0.815	0.815
21.967	22.203	2.632	2.634	12.785	12.858	1.629	1.638	NaN	NaN	NaN	NaN	0.772	0.772
22.984	23.235	2.857	2.859	12.411	12.483	1.642	1.652	NaN	NaN	NaN	NaN	0.533	0.533
23.781	24.044	2.254	2.251	12.252	12.323	1.61	1.619	NaN	NaN	NaN	NaN	0.52	0.52
23.267	23.522	2.347	2.344	23.097	23.303	1.936	1.946	NaN	NaN	NaN	NaN	0.315	0.315
22.661	22.907	2.3	2.297	7.883	8.159	2.105	2.117	NaN	NaN	NaN	NaN	0.322	0.322
7.368	7.481	2.083	2.081	10.043	10.131	2.109	2.121	NaN	NaN	NaN	NaN	1.519	1.519
7.794	7.914	2.871	2.869	25.372	25.521	2.009	2.02	NaN	NaN	NaN	NaN	1.528	1.527
7.456	7.571	2.889	2.887	35.825	36.129	2.004	2.015	NaN	NaN	NaN	NaN	4.367	4.366
7.505	7.621	2.871	2.869	18.587	18.686	2.101	2.111	NaN	NaN	NaN	NaN	3.587	3.586
7.352	7.465	2.781	2.783	19.535	19.638	2.332	2.345	NaN	NaN	NaN	NaN	3.709	3.708
7.521	7.637	2.779	2.781	20.516	20.623	2.219	2.23	NaN	NaN	NaN	NaN	1.117	1.117
10.168	10.292	3.49	3.494	24.522	24.658	2.177	2.188	NaN	NaN	NaN	NaN	1.067	1.067
7.721	7.814	3.584	3.588	17.471	17.564	2.077	2.087	NaN	NaN	NaN	NaN	0.813	0.813
10.558	10.687	4.066	4.074	17.436	17.528	2.01	2.01	NaN	NaN	NaN	NaN	0.816	0.815
11.281	11.418	4.005	4.012	21.452	21.572	1.994	1.995	NaN	NaN	NaN	NaN	1.949	1.949
9.961	10.082	1.962	1.964	18.71	18.81	1.984	1.985	NaN	NaN	NaN	NaN	1.976	1.975
8.704	8.809	1.907	1.908	25.436	25.566	1.978	1.978	NaN	NaN	NaN	NaN	0.423	0.423
2.52	2.534	1.274	1.276	14.473	14.628	1.989	1.99	NaN	NaN	NaN	NaN	0.426	0.426
2.501	2.515	1.263	1.264	15.107	15.27	1.544	1.549	NaN	NaN	NaN	NaN	0.317	0.317
2.507	2.522	1.868	1.869	15.78	15.948	1.497	1.502	NaN	NaN	NaN	NaN	0.317	0.317
2.234	2.243	1.819	1.821	14.646	14.805	1.509	1.514	NaN	NaN	NaN	NaN	0.414	0.415
30.198	30.369	2.196	2.198	14.864	15.019	1.568	1.573	NaN	NaN	NaN	NaN	0.421	0.421
30.738	30.91	1.845	1.848	12.446	12.59	1.767	1.778	NaN	NaN	NaN	NaN	0.108	0.108
30.721	30.893	1.821	1.824	15.372	15.536	1.758	1.768	NaN	NaN	NaN	NaN	0.108	0.107
30.556	30.727	1.804	1.807	12.64	12.78	1.74	1.75	NaN	NaN	NaN	NaN	0.179	0.179
33.739	33.936	1.854	1.857	16.296	16.468	1.751	1.762	NaN	NaN	NaN	NaN	0.178	0.178
29.516	29.687	1.761	1.762	8.653	8.743	1.76	1.77	NaN	NaN	NaN	NaN	0.163	0.163
5.479	5.564	1.857	1.858	10.653	10.908	2.236	2.249	NaN	NaN	NaN	NaN	0.161	0.161
5.506	5.592	1.999	2.001	9.603	9.807	1.879	1.888	NaN	NaN	NaN	NaN	0.182	0.182
5.616	5.703	1.416	1.417	10.031	10.27	1.824	1.832	NaN	NaN	NaN	NaN	0.183	0.183
5.359	5.442	4.399	4.403	9.292	9.49	1.922	1.931	NaN	NaN	NaN	NaN	0.169	0.169
5.233	5.315	4.623	4.628	8.773	8.969	1.866	1.875	NaN	NaN	NaN	NaN	0.17	0.17
5.197	5.261	4.355	4.359	12.075	12.358	3.296	3.319	NaN	NaN	NaN	NaN	0.151	0.15
5.085	5.148	4.749	4.754	9.945	10.175	3.414	3.437	NaN	NaN	NaN	NaN	0.15	0.15
5.084	5.146	1.282	1.283	8.386	8.57	3.572	3.596	NaN	NaN	NaN	NaN	3.818	3.817
13.4	13.669	1.272	1.273	8.255	8.428	3.717	3.743	NaN	NaN	NaN	NaN	12.314	12.307
13.012	13.274	0.793	0.794	14.089	14.416	2.723	2.724	NaN	NaN	NaN	NaN	1.284	1.285
13.565	13.836	1.642	1.644	4.814	4.901	77.169	77.962	NaN	NaN	NaN	NaN	4.388	4.385
12.499	12.75	2.09	2.093	4.425	4.503	73.875	74.611	NaN	NaN	NaN	NaN	4.056	4.054
1.448	1.465	1.667	1.669	4.971	5.062	25.201	25.39	NaN	NaN	NaN	NaN	30.395	30.353
1.475	1.493	1.739	1.741	4.06	4.13	33.454	33.768	NaN	NaN	NaN	NaN	2.643	2.641
1.402	1.419	1.585	1.587	5.795	5.906	40.531	40.928	NaN	NaN	NaN	NaN	2.711	2.709
3.547	3.591	2.848	2.85	4.26	4.341	23.859	23.967	NaN	NaN	NaN	NaN	20.854	20.842
3.52	3.564	2.267	2.269	5.093	5.196	14.878	14.958	NaN	NaN	NaN	NaN	22.946	22.933
1.979	1.99	2.868	2.871	4.535	4.625	5.768	5.752	NaN	NaN	NaN	NaN	11.615	11.608
1.981	1.991	0.742	0.742	4.357	4.441	5.808	5.791	NaN	NaN	NaN	NaN	19.765	19.744
1.981	1.991	0.755	0.755	4.55	4.639	6.256	6.269	NaN	NaN	NaN	NaN	19.495	19.474
4.052	4.065	0.761	0.762	3.795	3.866	38.79	39.176	NaN	NaN	NaN	NaN	3.445	3.444
3.969	3.979	6.529	6.506	6.019	6.143	6.118	6.197	NaN	NaN	NaN	NaN	0.477	0.477
4.072	4.086	5.878	5.859	3.679	3.717	1.171	1.172	NaN	NaN	NaN	NaN	2.756	2.757
0.868	0.872	6.58	6.588	31.957	32.213	15.843	15.973	NaN	NaN	NaN	NaN	2.813	2.814
0.879	0.883	5.184	5.191	31.457	31.708	2.835	2.85	NaN	NaN	NaN	NaN	2.772	2.773
2.624	2.64	3.489	3.496	32.153	32.408	4.432	4.462	NaN	NaN	NaN	NaN	2.798	2.799
2.389	2.403	4.625	4.621	34.069	34.334	85.279	86.162	NaN	NaN	NaN	NaN	0.183	0.183
2.496	2.509	NaN	NaN	34.933	35.202	1.456	1.466	NaN	NaN	NaN	NaN	22.891	22.879
3.117	3.153	NaN	NaN	31.109	31.357	61.127	61.735	NaN	NaN	NaN	NaN	7.031	7.027
2.968	3.001	NaN	NaN	31.275	31.523	59.391	59.977	NaN	NaN	NaN	NaN	18.755	18.739
1.62	1.623	NaN	NaN	24.684	24.854	15.946	16.06	NaN	NaN	NaN	NaN	18.429	18.413
1.627	1.629	NaN	NaN	29.129	29.267	9.233	9.286	NaN	NaN	NaN	NaN	13.455	13.449
1.507	1.509	NaN	NaN	28.456	28.599	7.756	7.803	NaN	NaN	NaN	NaN	0.41	0.41
1.032	1.036	NaN	NaN	27.949	28.096	1.341	1.35	NaN	NaN	NaN	NaN	2.72	2.718
1.009	1.013	NaN	NaN	30.648	30.783	1.753	1.767	NaN	NaN	NaN	NaN	2.726	2.724
1.206	1.199	NaN	NaN	13.955	14.039	56.962	57.526	NaN	NaN	NaN	NaN	18.342	18.332
1.206	1.199	NaN	NaN	13.953	14.037	5.132	5.12	NaN	NaN	NaN	NaN	13.277	13.27
1.207	1.2	NaN	NaN	13.947	14.032	3.414	3.44	NaN	NaN	NaN	NaN	17.983	17.973
1.349	1.351	NaN	NaN	13.972	14.055	5.618	5.637	NaN	NaN	NaN	NaN	14.521	14.514
1.35	1.352	NaN	NaN	24.457	24.565	3.667	3.609	NaN	NaN	NaN	NaN	14.597	14.587
23.798	24.061	NaN	NaN	25.256	25.371	5.414	5.401	NaN	NaN	NaN	NaN	12.004	11.998
7.158	7.206	NaN	NaN	27.614	27.751	5.447	5.433	NaN	NaN	NaN	NaN	13.476	13.469
12.366	12.462	NaN	NaN	24.745	24.853	5.846	5.88	NaN	NaN	NaN	NaN	9.322	9.318
15.581	15.706	NaN	NaN	16.159	16.211	4.277	4.252	NaN	NaN	NaN	NaN	12.321	12.314
44.487	44.998	NaN	NaN	16.601	16.653	78.303	79.103	NaN	NaN	NaN	NaN	13.269	13.263
5.247	5.312	NaN	NaN	15.814	15.866	7.375	7.498	NaN	NaN	NaN	NaN	12.045	12.039
12.992	13.255	NaN	NaN	14.397	14.447	5.831	5.815	NaN	NaN	NaN	NaN	14.613	14.606
3.507	3.55	NaN	NaN	11.229	11.398	20.162	20.303	NaN	NaN	NaN	NaN	11.7	11.694
39.983	40.258	NaN	NaN	11.233	11.411	16.105	16.229	NaN	NaN	NaN	NaN	14.549	14.542
15.509	15.633	NaN	NaN	11.299	11.476	18.088	18.228	NaN	NaN	NaN	NaN	16.059	16.051
7.089	7.22	NaN	NaN	11.244	11.426	18.582	18.704	NaN	NaN	NaN	NaN	9.258	9.254
7.288	7.4	NaN	NaN	9.13	9.188	16.252	16.382	NaN	NaN	NaN	NaN	8.967	8.963
15.553	15.678	NaN	NaN	10.026	10.091	40.292	40.531	NaN	NaN	NaN	NaN	8.54	8.535
2.953	2.986	NaN	NaN	10.886	10.955	18.79	18.926	NaN	NaN	NaN	NaN	8.503	8.499
1.655	1.658	NaN	NaN	9.623	9.685	10.019	10.102	NaN	NaN	NaN	NaN	10.212	10.206
12.276	12.369	NaN	NaN	9.097	9.153	15.529	15.652	NaN	NaN	NaN	NaN	9.339	9.334
2.246	2.255	NaN	NaN	13.485	13.59	12.599	12.704	NaN	NaN	NaN	NaN	8.936	8.931
0.947	0.951	NaN	NaN	13.578	13.684	85.496	86.319	NaN	NaN	NaN	NaN	10.044	10.038
4.438	4.515	NaN	NaN	13.292	13.396	85.121	85.954	NaN	NaN	NaN	NaN	9.605	9.599
4.35	4.395	NaN	NaN	18.611	18.856	84.568	85.387	NaN	NaN	NaN	NaN	2.243	2.242
24.666	25.025	NaN	NaN	17.859	18.095	74.935	75.686	NaN	NaN	NaN	NaN	2.756	2.756
11.52	11.706	NaN	NaN	18.207	18.452	74.819	75.554	NaN	NaN	NaN	NaN	2.497	2.498
20.182	20.493	NaN	NaN	17.799	18.047	84.106	84.915	NaN	NaN	NaN	NaN	2.828	2.829
24.726	25.086	NaN	NaN	17.167	17.382	86.526	87.407	NaN	NaN	NaN	NaN	2.847	2.847
18.911	19.21	NaN	NaN	18.997	19.266	76.424	77.206	NaN	NaN	NaN	NaN	1.87	1.871
20.875	21.192	NaN	NaN	5.408	5.445	81.594	82.36	NaN	NaN	NaN	NaN	2.113	2.114
18.701	18.992	NaN	NaN	5.203	5.238	63.7	64.2	NaN	NaN	NaN	NaN	2.748	2.749
10.292	10.466	NaN	NaN	5.29	5.325	58.705	59.152	NaN	NaN	NaN	NaN	2.5	2.501
7.802	7.928	NaN	NaN	5.331	5.366	61.315	61.794	NaN	NaN	NaN	NaN	2.353	2.353
13.332	13.544	NaN	NaN	5.975	6.02	60.899	61.379	NaN	NaN	NaN	NaN	2.771	2.77
17.997	18.288	NaN	NaN	1.872	1.88	59.688	60.144	NaN	NaN	NaN	NaN	1.996	1.995
20.041	20.34	NaN	NaN	1.858	1.865	64.512	65.025	NaN	NaN	NaN	NaN	3.126	3.124
24.368	24.515	NaN	NaN	1.967	1.975	56.377	56.8	NaN	NaN	NaN	NaN	3.421	3.42
24.499	24.66	NaN	NaN	1.952	1.96	57.972	58.431	NaN	NaN	NaN	NaN	3.133	3.132
24.719	24.884	NaN	NaN	5.413	5.53	38.048	38.39	NaN	NaN	NaN	NaN	3.609	3.607
24.496	24.647	NaN	NaN	17.06	17.183	39.856	40.225	NaN	NaN	NaN	NaN	3.634	3.632
24.246	24.392	NaN	NaN	17.008	17.118	37.097	37.443	NaN	NaN	NaN	NaN	0.22	0.22
23.884	24.028	NaN	NaN	17.056	17.171	40.295	40.657	NaN	NaN	NaN	NaN	0.227	0.227
24.259	24.432	NaN	NaN	17.068	17.182	36.746	37.092	NaN	NaN	NaN	NaN	0.223	0.223
23.616	23.76	NaN	NaN	16.213	16.345	0.898	0.9	NaN	NaN	NaN	NaN	0.217	0.217
23.406	23.547	NaN	NaN	16.188	16.319	0.897	0.899	NaN	NaN	NaN	NaN	0.221	0.221
13.436	13.477	NaN	NaN	16.459	16.591	0.8	0.802	NaN	NaN	NaN	NaN	0.217	0.217
9.972	10.011	NaN	NaN	16.004	16.131	0.838	0.841	NaN	NaN	NaN	NaN	1.535	1.536
20.353	20.473	NaN	NaN	23.73	23.824	2.547	2.562	NaN	NaN	NaN	NaN	1.013	1.013
14.031	14.096	NaN	NaN	21.964	22.12	2.237	2.25	NaN	NaN	NaN	NaN	0.976	0.975
19.06	19.173	NaN	NaN	21.715	21.874	2.578	2.594	NaN	NaN	NaN	NaN	0.881	0.881
30.179	30.545	NaN	NaN	18.097	18.229	2.157	2.169	NaN	NaN	NaN	NaN	3.665	3.665
29.076	29.416	NaN	NaN	18.875	19.005	2.447	2.462	NaN	NaN	NaN	NaN	3.691	3.69
30.29	30.653	NaN	NaN	18.523	18.648	2.329	2.342	NaN	NaN	NaN	NaN	3.395	3.395
30.13	30.494	NaN	NaN	18.497	18.63	2.139	2.15	NaN	NaN	NaN	NaN	3.382	3.381
30.501	30.866	NaN	NaN	20.989	21.193	105.158	106.185	NaN	NaN	NaN	NaN	19.63	19.609
30.352	30.717	NaN	NaN	21.028	21.229	105.773	106.805	NaN	NaN	NaN	NaN	19.158	19.137
28.151	28.5	NaN	NaN	21.058	21.263	109.776	110.836	NaN	NaN	NaN	NaN	19.335	19.315
18.396	18.568	NaN	NaN	21.079	21.286	104.932	105.957	NaN	NaN	NaN	NaN	19.158	19.138
18.897	19.076	NaN	NaN	14.93	15.008	69.52	70.14	NaN	NaN	NaN	NaN	18.64	18.62
18.338	18.511	NaN	NaN	15.154	15.234	72.725	73.391	NaN	NaN	NaN	NaN	19.674	19.653
17.984	18.152	NaN	NaN	15.57	15.652	71.044	71.678	NaN	NaN	NaN	NaN	4.054	4.053
18.701	18.878	NaN	NaN	17.022	17.105	69.323	69.945	NaN	NaN	NaN	NaN	4.289	4.288
17.744	17.908	NaN	NaN	17.023	17.104	72.5	73.142	NaN	NaN	NaN	NaN	4.108	4.108
4.469	4.467	NaN	NaN	17.014	17.095	72.411	73.051	NaN	NaN	NaN	NaN	3.681	3.681
4.084	4.083	NaN	NaN	17.029	17.111	70.12	70.754	NaN	NaN	NaN	NaN	15.179	15.165
4.214	4.212	NaN	NaN	13.366	13.448	72.992	73.665	NaN	NaN	NaN	NaN	14.7	14.687
4.273	4.271	NaN	NaN	11.353	11.424	74.273	74.982	NaN	NaN	NaN	NaN	13.749	13.737
4.393	4.39	NaN	NaN	12.539	12.617	74.867	75.583	NaN	NaN	NaN	NaN	14.34	14.326
25.249	25.518	NaN	NaN	12.905	12.984	76.228	76.958	NaN	NaN	NaN	NaN	16.576	16.563
24.977	25.242	NaN	NaN	15.206	15.297	74.672	75.385	NaN	NaN	NaN	NaN	16.59	16.576
25.052	25.316	NaN	NaN	21.889	22.121	72.002	72.687	NaN	NaN	NaN	NaN	16.615	16.601
25.166	25.434	NaN	NaN	21.804	22.036	79.884	80.644	NaN	NaN	NaN	NaN	16.725	16.711
43.326	43.743	NaN	NaN	21.999	22.229	98.379	99.329	NaN	NaN	NaN	NaN	4.241	4.239
42.636	43.049	NaN	NaN	22.137	22.369	102.241	103.217	NaN	NaN	NaN	NaN	4.066	4.065
40.6	41.002	NaN	NaN	18.01	18.102	94.144	95.027	NaN	NaN	NaN	NaN	4.215	4.213
43.363	43.779	NaN	NaN	17.939	18.03	66.713	67.403	NaN	NaN	NaN	NaN	4.087	4.085
41.912	42.32	NaN	NaN	18.105	18.198	67.832	68.53	NaN	NaN	NaN	NaN	23.56	23.537
43.297	43.714	NaN	NaN	3.984	4.016	89.314	90.204	NaN	NaN	NaN	NaN	23.858	23.835
2.445	2.483	NaN	NaN	3.822	3.852	69.749	70.466	NaN	NaN	NaN	NaN	23.32	23.297
2.504	2.544	NaN	NaN	4.006	4.039	2.431	2.442	NaN	NaN	NaN	NaN	24.675	24.651
2.45	2.489	NaN	NaN	4.438	4.477	2.466	2.477	NaN	NaN	NaN	NaN	24.924	24.9
2.601	2.644	NaN	NaN	4.036	4.068	2.435	2.446	NaN	NaN	NaN	NaN	22.73	22.707
2.123	2.155	NaN	NaN	2.85	2.862	2.519	2.53	NaN	NaN	NaN	NaN	6.549	6.552
1.969	1.985	NaN	NaN	2.529	2.539	2.417	2.427	NaN	NaN	NaN	NaN	6.473	6.475
2.138	2.155	NaN	NaN	2.511	2.521	2.263	2.268	NaN	NaN	NaN	NaN	7.182	7.185
2.02	2.036	NaN	NaN	2.522	2.532	2.283	2.287	NaN	NaN	NaN	NaN	6.682	6.684
2.268	2.287	NaN	NaN	15.551	15.595	2.412	2.417	NaN	NaN	NaN	NaN	6.791	6.794
2.2	2.218	NaN	NaN	15.389	15.434	2.245	2.249	NaN	NaN	NaN	NaN	2.195	2.195
23.404	23.679	NaN	NaN	15.551	15.603	1.495	1.502	NaN	NaN	NaN	NaN	2.425	2.425
22.996	23.272	NaN	NaN	15.791	15.841	1.477	1.484	NaN	NaN	NaN	NaN	2.038	2.047
23.266	23.544	NaN	NaN	6.884	6.96	1.544	1.551	NaN	NaN	NaN	NaN	2.057	2.065
23.186	23.454	NaN	NaN	6.041	6.103	1.441	1.447	NaN	NaN	NaN	NaN	2.095	2.102
6.718	6.749	NaN	NaN	8.198	8.291	24.601	24.845	NaN	NaN	NaN	NaN	2.077	2.084
7.569	7.607	NaN	NaN	17.324	17.414	12.187	12.306	NaN	NaN	NaN	NaN	25.173	25.15
7.348	7.384	NaN	NaN	17.362	17.459	2.491	2.522	NaN	NaN	NaN	NaN	24.278	24.256
12.082	12.198	NaN	NaN	17.735	17.828	29.878	30.174	NaN	NaN	NaN	NaN	25.437	25.414
12.584	12.707	NaN	NaN	17.214	17.303	18.196	18.375	NaN	NaN	NaN	NaN	22.649	22.629
12.149	12.266	NaN	NaN	13.188	13.321	24.262	24.503	NaN	NaN	NaN	NaN	18.905	18.888
21.838	22.11	NaN	NaN	13.6	13.738	23.871	24.109	NaN	NaN	NaN	NaN	19.15	19.134
21.81	22.078	NaN	NaN	8.887	8.996	20.586	20.791	NaN	NaN	NaN	NaN	19.029	19.013
22.038	22.314	NaN	NaN	9.571	9.693	35.04	35.383	NaN	NaN	NaN	NaN	18.874	18.857
21.692	21.959	NaN	NaN	6.238	6.317	26.784	27.051	NaN	NaN	NaN	NaN	19.479	19.461
11.994	12.116	NaN	NaN	6.107	6.183	14.048	14.184	NaN	NaN	NaN	NaN	19.974	19.955
11.895	12.017	NaN	NaN	6.586	6.67	18.221	18.347	NaN	NaN	NaN	NaN	19.593	19.575
11.599	11.721	NaN	NaN	6.301	6.379	24.542	24.705	NaN	NaN	NaN	NaN	19.696	19.678
10.028	10.143	NaN	NaN	18.001	18.125	23.213	23.367	NaN	NaN	NaN	NaN	20.423	20.408
10.068	10.179	NaN	NaN	17.748	17.885	26.972	27.149	NaN	NaN	NaN	NaN	19.471	19.457
11.707	11.828	NaN	NaN	17.839	17.971	23.637	23.8	NaN	NaN	NaN	NaN	19.761	19.746
10.766	10.879	NaN	NaN	1.628	1.632	26.181	26.355	NaN	NaN	NaN	NaN	19.737	19.723
11.977	12.099	NaN	NaN	1.604	1.607	27.177	27.356	NaN	NaN	NaN	NaN	14.559	14.549
10.542	10.658	NaN	NaN	1.983	2	7.871	7.912	NaN	NaN	NaN	NaN	15.768	15.758
4.008	4.051	NaN	NaN	2.173	2.197	9.72	9.77	NaN	NaN	NaN	NaN	15.593	15.584
3.778	3.818	NaN	NaN	2.122	2.145	12.773	12.839	NaN	NaN	NaN	NaN	15.002	14.992
3.601	3.638	NaN	NaN	2.079	2.1	8.707	8.752	NaN	NaN	NaN	NaN	15.696	15.687
3.808	3.849	NaN	NaN	2.103	2.125	23.264	23.498	NaN	NaN	NaN	NaN	3.69	3.692
3.392	3.425	NaN	NaN	2.117	2.139	16.384	16.533	NaN	NaN	NaN	NaN	3.881	3.884
3.696	3.734	NaN	NaN	2.226	2.236	17.343	17.503	NaN	NaN	NaN	NaN	3.99	3.993
4.011	4.055	NaN	NaN	2.076	2.085	37.726	38.07	NaN	NaN	NaN	NaN	3.996	3.998
3.94	3.981	NaN	NaN	2.131	2.141	35.15	35.473	NaN	NaN	NaN	NaN	4.116	4.118
5.852	5.901	NaN	NaN	2.13	2.138	37.123	37.462	NaN	NaN	NaN	NaN	6.851	6.844
5.332	5.375	NaN	NaN	2.077	2.085	51.173	51.498	NaN	NaN	NaN	NaN	6.672	6.666
6.589	6.646	NaN	NaN	8.719	8.837	50.074	50.395	NaN	NaN	NaN	NaN	6.76	6.753
5.498	5.543	NaN	NaN	8.002	8.103	18.798	18.938	NaN	NaN	NaN	NaN	6.629	6.623
5.895	5.944	NaN	NaN	7.719	7.815	17.424	17.552	NaN	NaN	NaN	NaN	3.879	3.881
6.328	6.382	NaN	NaN	8.291	8.395	18.359	18.498	NaN	NaN	NaN	NaN	3.791	3.793
1.83	1.843	NaN	NaN	8.063	8.168	8.607	8.655	NaN	NaN	NaN	NaN	3.848	3.849
1.746	1.756	NaN	NaN	1.502	1.507	5.163	5.19	NaN	NaN	NaN	NaN	3.885	3.886
1.562	1.571	NaN	NaN	1.392	1.395	7.198	7.237	NaN	NaN	NaN	NaN	10.979	10.97
1.631	1.641	NaN	NaN	1.388	1.391	5.756	5.8	NaN	NaN	NaN	NaN	10.879	10.871
1.729	1.739	NaN	NaN	1.414	1.417	6.261	6.308	NaN	NaN	NaN	NaN	11.073	11.064
3.3	3.334	NaN	NaN	1.39	1.394	6.297	6.344	NaN	NaN	NaN	NaN	11.292	11.284
3.217	3.25	NaN	NaN	1.079	1.083	2.495	2.515	NaN	NaN	NaN	NaN	11.215	11.206
3.121	3.152	NaN	NaN	1.207	1.21	2.454	2.474	NaN	NaN	NaN	NaN	0.275	0.274
3.199	3.231	NaN	NaN	1.093	1.097	2.458	2.478	NaN	NaN	NaN	NaN	0.283	0.283
3.353	3.387	NaN	NaN	1.218	1.221	2.447	2.459	NaN	NaN	NaN	NaN	0.286	0.286
3.169	3.201	NaN	NaN	1.285	1.288	2.451	2.464	NaN	NaN	NaN	NaN	0.424	0.423
16.209	16.356	NaN	NaN	2.08	2.087	2.362	2.374	NaN	NaN	NaN	NaN	0.428	0.428
16.311	16.461	NaN	NaN	1.964	1.97	42.761	43.249	NaN	NaN	NaN	NaN	2.536	2.536
16.874	17.029	NaN	NaN	1.905	1.911	50.855	51.438	NaN	NaN	NaN	NaN	2.674	2.674
16.274	16.424	NaN	NaN	1.993	1.999	48.644	49.2	NaN	NaN	NaN	NaN	2.619	2.62
16.144	16.291	NaN	NaN	2.037	2.045	41.005	41.464	NaN	NaN	NaN	NaN	2.631	2.631
12.791	12.956	NaN	NaN	3.282	3.301	48.586	49.141	NaN	NaN	NaN	NaN	2.646	2.647
14.496	14.68	NaN	NaN	3.282	3.301	45.654	46.168	NaN	NaN	NaN	NaN	3.283	3.285
13.217	13.387	NaN	NaN	3.205	3.224	52.705	53.312	NaN	NaN	NaN	NaN	3.343	3.345
13.37	13.542	NaN	NaN	3.653	3.672	52.384	52.989	NaN	NaN	NaN	NaN	3.401	3.403
12.777	12.942	NaN	NaN	3.274	3.293	48.04	48.592	NaN	NaN	NaN	NaN	3.358	3.36
13.512	13.685	NaN	NaN	2.891	2.901	39.012	39.448	NaN	NaN	NaN	NaN	3.222	3.223
12.993	13.146	NaN	NaN	3.004	3.015	9.941	9.951	NaN	NaN	NaN	NaN	1.743	1.743
10.843	10.966	NaN	NaN	2.922	2.932	10.094	10.104	NaN	NaN	NaN	NaN	1.726	1.726
13.398	13.558	NaN	NaN	8.877	8.986	8.163	8.17	NaN	NaN	NaN	NaN	1.743	1.743
14.197	14.369	NaN	NaN	17.18	17.268	6.889	6.897	NaN	NaN	NaN	NaN	1.688	1.688
12.858	13.01	NaN	NaN	21.034	21.236	6.977	6.983	NaN	NaN	NaN	NaN	2.055	2.056
11.576	11.709	NaN	NaN	32.374	32.629	8.433	8.441	NaN	NaN	NaN	NaN	2.04	2.041
2.866	2.881	NaN	NaN	11.249	11.42	5.602	5.613	NaN	NaN	NaN	NaN	5.017	5.019
2.779	2.793	NaN	NaN	20.301	20.419	4.141	4.143	NaN	NaN	NaN	NaN	4.865	4.867
2.886	2.901	NaN	NaN	15.206	15.286	3.7	3.703	NaN	NaN	NaN	NaN	1.322	1.323
1.5	1.501	NaN	NaN	5.471	5.51	13.491	13.658	NaN	NaN	NaN	NaN	1.419	1.42
12.164	12.232	NaN	NaN	5.241	5.276	13.375	13.54	NaN	NaN	NaN	NaN	1.095	1.095
12.12	12.187	NaN	NaN	5.297	5.331	9.276	9.38	NaN	NaN	NaN	NaN	1.094	1.094
12.097	12.163	NaN	NaN	27.952	28.099	14.294	14.472	NaN	NaN	NaN	NaN	0.827	0.827
12.099	12.165	NaN	NaN	13.953	14.038	11.992	12.137	NaN	NaN	NaN	NaN	0.855	0.855
11.675	11.737	NaN	NaN	3.818	3.848	15.092	15.283	NaN	NaN	NaN	NaN	2.361	2.363
12.302	12.373	NaN	NaN	12.85	12.993	7.013	7.084	NaN	NaN	NaN	NaN	2.366	2.368
3.475	3.505	NaN	NaN	25.693	25.813	16.551	16.763	NaN	NaN	NaN	NaN	0.42	0.42
3.484	3.514	NaN	NaN	19.646	19.697	14.46	14.641	NaN	NaN	NaN	NaN	0.422	0.422
3.573	3.605	NaN	NaN	19.184	19.233	5.76	5.765	NaN	NaN	NaN	NaN	0.389	0.389
3.417	3.447	NaN	NaN	18.536	18.586	6.451	6.452	NaN	NaN	NaN	NaN	0.773	0.773
3.318	3.347	NaN	NaN	17.906	17.943	5.94	5.946	NaN	NaN	NaN	NaN	0.847	0.846
8.491	8.581	NaN	NaN	20.217	20.272	6.328	6.334	NaN	NaN	NaN	NaN	0.605	0.605
8.748	8.842	NaN	NaN	20.202	20.259	6.2	6.206	NaN	NaN	NaN	NaN	0.604	0.604
8.938	9.034	NaN	NaN	19.258	19.296	6.373	6.373	NaN	NaN	NaN	NaN	1.881	1.881
15.376	15.477	NaN	NaN	19.699	19.747	6.069	6.074	NaN	NaN	NaN	NaN	1.844	1.844
14.367	14.463	NaN	NaN	16.347	16.385	6.86	6.836	NaN	NaN	NaN	NaN	0.831	0.831
16.197	16.305	NaN	NaN	28.119	29.598	1.079	1.082	NaN	NaN	NaN	NaN	0.63	0.63
13.745	13.838	NaN	NaN	32.591	34.359	3.462	3.477	NaN	NaN	NaN	NaN	0.68	0.68
6.491	6.563	NaN	NaN	35.864	37.818	2.696	2.706	NaN	NaN	NaN	NaN	0.638	0.638
6.113	6.181	NaN	NaN	30.084	31.699	2.269	2.277	NaN	NaN	NaN	NaN	0.689	0.689
5.525	5.586	NaN	NaN	27.291	28.683	2.974	2.986	NaN	NaN	NaN	NaN	0.496	0.496
4.627	4.71	NaN	NaN	20.468	21.604	2.647	2.657	NaN	NaN	NaN	NaN	0.494	0.494
4.655	4.739	NaN	NaN	33.632	35.452	2.076	2.083	NaN	NaN	NaN	NaN	0.734	0.734
3.049	3.069	NaN	NaN	21.022	22.101	4.547	4.565	NaN	NaN	NaN	NaN	0.701	0.7
3.027	3.046	NaN	NaN	38.696	40.819	3.432	3.447	NaN	NaN	NaN	NaN	0.644	0.644
3.042	3.061	NaN	NaN	4.741	4.93	4.7	4.713	NaN	NaN	NaN	NaN	0.661	0.661
2.967	2.983	NaN	NaN	16.844	18.351	4.365	4.377	NaN	NaN	NaN	NaN	0.377	0.377
2.825	2.839	NaN	NaN	15.686	17.031	4.871	4.885	NaN	NaN	NaN	NaN	0.378	0.378
2.994	3.011	NaN	NaN	16.88	18.389	5.185	5.201	NaN	NaN	NaN	NaN	0.31	0.31
2.307	2.332	NaN	NaN	16.912	18.378	3.094	3.104	NaN	NaN	NaN	NaN	0.314	0.314
2.25	2.273	NaN	NaN	18.568	20.214	3.163	3.171	NaN	NaN	NaN	NaN	0.098	0.097
1.978	1.977	NaN	NaN	18.277	19.911	3.099	3.108	NaN	NaN	NaN	NaN	0.098	0.097
2.17	2.171	NaN	NaN	17.95	19.549	1.696	1.704	NaN	NaN	NaN	NaN	0.128	0.128
2.299	2.3	NaN	NaN	19.036	20.719	1.735	1.743	NaN	NaN	NaN	NaN	0.127	0.127
2.396	2.426	NaN	NaN	17.115	18.597	1.64	1.648	NaN	NaN	NaN	NaN	0.146	0.146
2.295	2.324	NaN	NaN	19.379	21.115	1.732	1.74	NaN	NaN	NaN	NaN	0.142	0.142
1.194	1.195	NaN	NaN	9.034	9.707	4.07	4.092	NaN	NaN	NaN	NaN	0.397	0.397
1.204	1.205	NaN	NaN	7.809	8.36	4.106	4.129	NaN	NaN	NaN	NaN	0.4	0.4
1.129	1.13	NaN	NaN	9.378	10.086	4.019	4.04	NaN	NaN	NaN	NaN	0.098	0.097
1.469	1.476	NaN	NaN	6.789	7.237	9.551	9.477	NaN	NaN	NaN	NaN	0.099	0.099
1.473	1.48	NaN	NaN	11.985	12.953	9.515	9.443	NaN	NaN	NaN	NaN	0.107	0.107
2.195	2.193	NaN	NaN	8.29	8.918	9.652	9.578	NaN	NaN	NaN	NaN	0.107	0.107
2.22	2.218	NaN	NaN	10.738	11.613	4.99	4.991	NaN	NaN	NaN	NaN	3.972	3.971
2.244	2.242	NaN	NaN	9.243	9.981	4.999	5	NaN	NaN	NaN	NaN	10.03	10.025
0.773	0.776	NaN	NaN	8.622	9.287	4.748	4.75	NaN	NaN	NaN	NaN	1.1	1.1
0.773	0.776	NaN	NaN	9.168	9.888	6.081	6.072	NaN	NaN	NaN	NaN	0.996	0.996
16.933	17.089	NaN	NaN	7.256	7.793	6.07	6.061	NaN	NaN	NaN	NaN	0.93	0.93
15.148	15.24	NaN	NaN	13.412	14.54	3.989	3.991	NaN	NaN	NaN	NaN	15.033	15.023
17.074	17.162	NaN	NaN	3.309	3.428	5.359	5.358	NaN	NaN	NaN	NaN	3.731	3.732
24.356	24.503	NaN	NaN	35.133	35.264	6.081	6.059	NaN	NaN	NaN	NaN	3.817	3.818
30.451	30.815	NaN	NaN	35.749	35.883	6.04	6.041	NaN	NaN	NaN	NaN	12.576	12.57
8.795	8.89	NaN	NaN	35.363	35.495	1.909	1.919	NaN	NaN	NaN	NaN	13.416	13.408
13.661	13.751	NaN	NaN	34.177	34.303	2.503	2.518	NaN	NaN	NaN	NaN	9.082	9.078
4.657	4.741	NaN	NaN	33.629	33.752	1.821	1.831	NaN	NaN	NaN	NaN	16.747	16.733
23.332	23.609	NaN	NaN	35.671	35.805	1.669	1.678	NaN	NaN	NaN	NaN	16.582	16.568
24.452	24.6	NaN	NaN	35.642	35.775	2.105	2.116	NaN	NaN	NaN	NaN	0.573	0.573
3.286	3.319	NaN	NaN	32.509	32.788	3.481	3.471	NaN	NaN	NaN	NaN	0.484	0.484
12.484	12.646	NaN	NaN	31.299	31.563	3.32	3.31	NaN	NaN	NaN	NaN	1.745	1.745
24.465	24.625	NaN	NaN	31.815	32.086	3.474	3.464	NaN	NaN	NaN	NaN	1.74	1.74
2.288	2.317	NaN	NaN	32.219	32.495	3.154	3.147	NaN	NaN	NaN	NaN	1.737	1.737
1.222	1.223	NaN	NaN	30.561	30.82	3.751	3.74	NaN	NaN	NaN	NaN	1.7	1.7
20.561	20.685	NaN	NaN	22.306	22.406	2.746	2.743	NaN	NaN	NaN	NaN	0.398	0.398
1.519	1.52	NaN	NaN	22.556	22.664	5.876	5.835	NaN	NaN	NaN	NaN	13.253	13.247
2.294	2.316	NaN	NaN	22.439	22.539	5.808	5.767	NaN	NaN	NaN	NaN	9.059	9.054
2.495	2.535	NaN	NaN	22.098	22.2	5.797	5.757	NaN	NaN	NaN	NaN	19.741	19.727
11.867	11.989	NaN	NaN	11.348	11.4	5.813	5.773	NaN	NaN	NaN	NaN	19.769	19.755
NaN	NaN	NaN	NaN	11.541	11.591	5.282	5.248	NaN	NaN	NaN	NaN	2.731	2.73
NaN	NaN	NaN	NaN	12.124	12.169	5.097	5.122	NaN	NaN	NaN	NaN	0.309	0.309
NaN	NaN	NaN	NaN	11.236	11.289	5.282	5.306	NaN	NaN	NaN	NaN	3.83	3.832
NaN	NaN	NaN	NaN	23.104	23.188	5.349	5.373	NaN	NaN	NaN	NaN	3.815	3.817
NaN	NaN	NaN	NaN	22.971	23.054	3.737	3.745	NaN	NaN	NaN	NaN	6.551	6.55
NaN	NaN	NaN	NaN	23.057	23.14	3.897	3.905	NaN	NaN	NaN	NaN	6.128	6.128
NaN	NaN	NaN	NaN	23.693	23.778	3.816	3.825	NaN	NaN	NaN	NaN	6.511	6.51
NaN	NaN	NaN	NaN	21.375	21.479	1.144	1.145	NaN	NaN	NaN	NaN	6.232	6.233
NaN	NaN	NaN	NaN	20.46	20.565	1.127	1.127	NaN	NaN	NaN	NaN	6.391	6.391
NaN	NaN	NaN	NaN	20.628	20.732	1.129	1.13	NaN	NaN	NaN	NaN	5.859	5.859
NaN	NaN	NaN	NaN	20.153	20.259	4.542	4.54	NaN	NaN	NaN	NaN	6.032	6.032
NaN	NaN	NaN	NaN	5.351	5.438	4.481	4.478	NaN	NaN	NaN	NaN	5.173	5.174
NaN	NaN	NaN	NaN	5.482	5.577	5.25	5.247	NaN	NaN	NaN	NaN	6.155	6.154
NaN	NaN	NaN	NaN	5.545	5.646	4.549	4.541	NaN	NaN	NaN	NaN	6.069	6.069
NaN	NaN	NaN	NaN	5.455	5.547	4.151	4.143	NaN	NaN	NaN	NaN	5.887	5.887
NaN	NaN	NaN	NaN	5.26	5.344	4.328	4.32	NaN	NaN	NaN	NaN	6.262	6.263
NaN	NaN	NaN	NaN	5.557	5.709	4.031	4.018	NaN	NaN	NaN	NaN	5.874	5.874
NaN	NaN	NaN	NaN	5.547	5.698	5.003	5.002	NaN	NaN	NaN	NaN	6.274	6.274
NaN	NaN	NaN	NaN	5.461	5.611	5.03	5.029	NaN	NaN	NaN	NaN	6.406	6.406
NaN	NaN	NaN	NaN	5.137	5.312	5.019	5.018	NaN	NaN	NaN	NaN	5.309	5.309
NaN	NaN	NaN	NaN	4.465	4.602	37.524	37.986	NaN	NaN	NaN	NaN	5.201	5.201
NaN	NaN	NaN	NaN	4.335	4.464	38.776	39.256	NaN	NaN	NaN	NaN	16.022	16.012
NaN	NaN	NaN	NaN	3.54	3.629	36.213	36.658	NaN	NaN	NaN	NaN	19.293	19.279
NaN	NaN	NaN	NaN	5.128	5.299	38.577	39.054	NaN	NaN	NaN	NaN	21.391	21.377
NaN	NaN	NaN	NaN	4.183	4.311	64.463	65.296	NaN	NaN	NaN	NaN	20.458	20.445
NaN	NaN	NaN	NaN	3.05	3.121	63.807	64.625	NaN	NaN	NaN	NaN	18.33	18.318
NaN	NaN	NaN	NaN	3.038	3.109	66.245	67.097	NaN	NaN	NaN	NaN	19.699	19.686
NaN	NaN	NaN	NaN	3.085	3.154	65.344	66.187	NaN	NaN	NaN	NaN	19.388	19.375
NaN	NaN	NaN	NaN	3.084	3.154	58.013	58.758	NaN	NaN	NaN	NaN	3.891	3.889
NaN	NaN	NaN	NaN	3.018	3.084	13.437	13.759	NaN	NaN	NaN	NaN	1.234	1.234
NaN	NaN	NaN	NaN	1.326	1.336	13.522	13.879	NaN	NaN	NaN	NaN	1.108	1.108
NaN	NaN	NaN	NaN	1.323	1.332	13.512	13.892	NaN	NaN	NaN	NaN	1.265	1.265
NaN	NaN	NaN	NaN	1.294	1.304	13.356	13.64	NaN	NaN	NaN	NaN	1.278	1.278
NaN	NaN	NaN	NaN	1.175	1.184	12.98	13.274	NaN	NaN	NaN	NaN	0.81	0.81
NaN	NaN	NaN	NaN	11.985	13.041	13.426	13.725	NaN	NaN	NaN	NaN	0.924	0.924
NaN	NaN	NaN	NaN	13.535	13.744	12.924	13.292	NaN	NaN	NaN	NaN	1.231	1.231
NaN	NaN	NaN	NaN	13.627	13.816	13.091	13.327	NaN	NaN	NaN	NaN	1.11	1.11
NaN	NaN	NaN	NaN	13.654	13.849	5.624	5.588	NaN	NaN	NaN	NaN	1.038	1.037
NaN	NaN	NaN	NaN	13.672	13.865	5.59	5.554	NaN	NaN	NaN	NaN	3.399	3.399
NaN	NaN	NaN	NaN	14.338	14.422	5.188	5.193	NaN	NaN	NaN	NaN	3.101	3.101
NaN	NaN	NaN	NaN	14.326	14.409	5.188	5.193	NaN	NaN	NaN	NaN	2.455	2.455
NaN	NaN	NaN	NaN	14.241	14.323	1.246	1.249	NaN	NaN	NaN	NaN	4.105	4.104
NaN	NaN	NaN	NaN	14.504	14.588	2.017	2.025	NaN	NaN	NaN	NaN	3.576	3.575
NaN	NaN	NaN	NaN	30.083	30.309	1.457	1.457	NaN	NaN	NaN	NaN	3.616	3.615
NaN	NaN	NaN	NaN	25.501	25.694	1.381	1.382	NaN	NaN	NaN	NaN	3.051	3.05
NaN	NaN	NaN	NaN	24.583	24.767	4.471	4.471	NaN	NaN	NaN	NaN	0.19	0.19
NaN	NaN	NaN	NaN	14.376	14.449	4.534	4.535	NaN	NaN	NaN	NaN	0.196	0.196
NaN	NaN	NaN	NaN	13.406	13.479	1.88	1.885	NaN	NaN	NaN	NaN	0.192	0.192
NaN	NaN	NaN	NaN	14.09	14.155	2.151	2.154	NaN	NaN	NaN	NaN	0.188	0.188
NaN	NaN	NaN	NaN	14.018	14.092	2.846	2.845	NaN	NaN	NaN	NaN	0.189	0.189
NaN	NaN	NaN	NaN	26.435	26.659	2.838	2.837	NaN	NaN	NaN	NaN	0.188	0.188
NaN	NaN	NaN	NaN	26.07	26.288	2.701	2.68	NaN	NaN	NaN	NaN	0.659	0.659
NaN	NaN	NaN	NaN	26.942	27.174	2.573	2.553	NaN	NaN	NaN	NaN	0.89	0.889
NaN	NaN	NaN	NaN	27.17	27.405	5.469	5.427	NaN	NaN	NaN	NaN	0.828	0.828
NaN	NaN	NaN	NaN	18.577	18.671	5.2	5.162	NaN	NaN	NaN	NaN	0.642	0.642
NaN	NaN	NaN	NaN	18.924	19.018	5.865	5.807	NaN	NaN	NaN	NaN	9.282	9.277
NaN	NaN	NaN	NaN	19.079	19.172	5.897	5.838	NaN	NaN	NaN	NaN	9.021	9.017
NaN	NaN	NaN	NaN	17.081	17.162	5.361	5.351	NaN	NaN	NaN	NaN	7.565	7.561
NaN	NaN	NaN	NaN	17.394	17.476	4.768	4.759	NaN	NaN	NaN	NaN	7.963	7.959
NaN	NaN	NaN	NaN	17.425	17.508	3.329	3.327	NaN	NaN	NaN	NaN	10.129	10.119
NaN	NaN	NaN	NaN	17.235	17.317	3.153	3.153	NaN	NaN	NaN	NaN	9.829	9.82
NaN	NaN	NaN	NaN	18.664	18.739	1.454	1.455	NaN	NaN	NaN	NaN	9.912	9.903
NaN	NaN	NaN	NaN	19.285	19.359	1.423	1.424	NaN	NaN	NaN	NaN	9.895	9.886
NaN	NaN	NaN	NaN	18.639	18.714	56.852	57.258	NaN	NaN	NaN	NaN	9.214	9.206
NaN	NaN	NaN	NaN	19.386	19.459	56.96	57.367	NaN	NaN	NaN	NaN	10.358	10.348
NaN	NaN	NaN	NaN	18.587	18.662	55.635	56.025	NaN	NaN	NaN	NaN	2.146	2.146
NaN	NaN	NaN	NaN	23.155	23.352	39.244	39.535	NaN	NaN	NaN	NaN	2.179	2.178
NaN	NaN	NaN	NaN	23.246	23.444	37.375	37.646	NaN	NaN	NaN	NaN	2.172	2.171
NaN	NaN	NaN	NaN	22.304	22.493	50.753	51.201	NaN	NaN	NaN	NaN	2.032	2.032
NaN	NaN	NaN	NaN	22.038	22.224	53.045	53.516	NaN	NaN	NaN	NaN	8.352	8.347
NaN	NaN	NaN	NaN	12.91	12.965	51.536	51.991	NaN	NaN	NaN	NaN	8.215	8.21
NaN	NaN	NaN	NaN	13.008	13.063	69.944	70.602	NaN	NaN	NaN	NaN	7.925	7.921
NaN	NaN	NaN	NaN	12.901	12.956	69.355	70.007	NaN	NaN	NaN	NaN	8.117	8.113
NaN	NaN	NaN	NaN	2.933	2.977	30.267	30.495	NaN	NaN	NaN	NaN	12.906	12.89
NaN	NaN	NaN	NaN	2.75	2.789	30.037	30.26	NaN	NaN	NaN	NaN	13.077	13.061
NaN	NaN	NaN	NaN	2.902	2.947	72.305	72.986	NaN	NaN	NaN	NaN	12.894	12.878
NaN	NaN	NaN	NaN	3.229	3.289	73.875	74.566	NaN	NaN	NaN	NaN	12.835	12.819
NaN	NaN	NaN	NaN	2.977	3.023	75.584	76.307	NaN	NaN	NaN	NaN	8.275	8.27
NaN	NaN	NaN	NaN	11.73	11.866	76.635	77.372	NaN	NaN	NaN	NaN	7.805	7.8
NaN	NaN	NaN	NaN	12.334	12.471	74.302	75.009	NaN	NaN	NaN	NaN	8.179	8.174
NaN	NaN	NaN	NaN	11.898	12.031	47.584	48.036	NaN	NaN	NaN	NaN	7.791	7.786
NaN	NaN	NaN	NaN	11.467	11.593	46.296	46.737	NaN	NaN	NaN	NaN	24.175	24.167
NaN	NaN	NaN	NaN	15.126	15.295	68.341	69.005	NaN	NaN	NaN	NaN	23.732	23.725
NaN	NaN	NaN	NaN	15.309	15.479	67.367	68.024	NaN	NaN	NaN	NaN	23.664	23.656
NaN	NaN	NaN	NaN	15.848	16.02	34.964	35.31	NaN	NaN	NaN	NaN	23.033	23.025
NaN	NaN	NaN	NaN	15.47	15.641	21.832	22.045	NaN	NaN	NaN	NaN	23.342	23.334
NaN	NaN	NaN	NaN	5.724	5.909	22.684	22.882	NaN	NaN	NaN	NaN	23.77	23.763
NaN	NaN	NaN	NaN	4.959	5.103	23.618	23.825	NaN	NaN	NaN	NaN	1.951	1.951
NaN	NaN	NaN	NaN	7.724	8.016	4.421	4.466	NaN	NaN	NaN	NaN	1.945	1.945
NaN	NaN	NaN	NaN	5.874	5.962	4.149	4.192	NaN	NaN	NaN	NaN	2.022	2.022
NaN	NaN	NaN	NaN	5.714	5.804	6.174	6.23	NaN	NaN	NaN	NaN	1.95	1.95
NaN	NaN	NaN	NaN	5.957	6.049	5.803	5.855	NaN	NaN	NaN	NaN	1.985	1.985
NaN	NaN	NaN	NaN	5.846	5.934	6.228	6.274	NaN	NaN	NaN	NaN	4.156	4.155
NaN	NaN	NaN	NaN	17.939	19.058	5.634	5.677	NaN	NaN	NaN	NaN	4.403	4.402
NaN	NaN	NaN	NaN	19.706	20.924	8.044	8.11	NaN	NaN	NaN	NaN	6.484	6.485
NaN	NaN	NaN	NaN	7.014	7.266	6.74	6.796	NaN	NaN	NaN	NaN	6.983	6.984
NaN	NaN	NaN	NaN	6.886	7.129	3.42	3.425	NaN	NaN	NaN	NaN	7.224	7.225
NaN	NaN	NaN	NaN	1.875	1.901	2.984	2.988	NaN	NaN	NaN	NaN	6.873	6.874
NaN	NaN	NaN	NaN	1.881	1.907	2.882	2.885	NaN	NaN	NaN	NaN	26.85	26.838
NaN	NaN	NaN	NaN	2.019	2.049	8.052	8.111	NaN	NaN	NaN	NaN	26.294	26.281
NaN	NaN	NaN	NaN	2.037	2.067	7.878	7.935	NaN	NaN	NaN	NaN	27.58	27.568
NaN	NaN	NaN	NaN	7.478	7.598	7.89	7.947	NaN	NaN	NaN	NaN	23.529	23.515
NaN	NaN	NaN	NaN	7.199	7.318	9.159	9.228	NaN	NaN	NaN	NaN	16.525	16.509
NaN	NaN	NaN	NaN	7.366	7.487	7.481	7.534	NaN	NaN	NaN	NaN	16.758	16.742
NaN	NaN	NaN	NaN	0.804	0.805	8.35	8.411	NaN	NaN	NaN	NaN	16.621	16.605
NaN	NaN	NaN	NaN	0.817	0.818	12.832	12.939	NaN	NaN	NaN	NaN	16.473	16.457
NaN	NaN	NaN	NaN	1.686	1.705	9.96	10.036	NaN	NaN	NaN	NaN	15.206	15.194
NaN	NaN	NaN	NaN	1.841	1.863	12.888	12.995	NaN	NaN	NaN	NaN	16.901	16.888
NaN	NaN	NaN	NaN	1.848	1.871	13.899	14.016	NaN	NaN	NaN	NaN	16.52	16.507
NaN	NaN	NaN	NaN	1.849	1.872	13.187	13.296	NaN	NaN	NaN	NaN	16.459	16.446
NaN	NaN	NaN	NaN	1.844	1.867	13.854	13.969	NaN	NaN	NaN	NaN	26.536	26.521
NaN	NaN	NaN	NaN	1.837	1.859	2.465	2.478	NaN	NaN	NaN	NaN	25.999	25.986
NaN	NaN	NaN	NaN	1.06	1.069	2.621	2.635	NaN	NaN	NaN	NaN	25.92	25.907
NaN	NaN	NaN	NaN	1.008	1.018	2.537	2.551	NaN	NaN	NaN	NaN	25.555	25.542
NaN	NaN	NaN	NaN	1.029	1.038	14.862	15.008	NaN	NaN	NaN	NaN	9.688	9.688
NaN	NaN	NaN	NaN	0.963	0.971	14.337	14.477	NaN	NaN	NaN	NaN	8.687	8.687
NaN	NaN	NaN	NaN	0.947	0.955	14.441	14.582	NaN	NaN	NaN	NaN	8.808	8.809
NaN	NaN	NaN	NaN	4.207	4.37	12.504	12.618	NaN	NaN	NaN	NaN	8.999	8.999
NaN	NaN	NaN	NaN	4.035	4.181	14.953	15.101	NaN	NaN	NaN	NaN	8.625	8.625
NaN	NaN	NaN	NaN	3.985	4.131	15.768	15.926	NaN	NaN	NaN	NaN	3.145	3.145
NaN	NaN	NaN	NaN	4.053	4.194	9.485	9.578	NaN	NaN	NaN	NaN	3.09	3.09
NaN	NaN	NaN	NaN	4.106	4.262	9.3	9.382	NaN	NaN	NaN	NaN	3.162	3.162
NaN	NaN	NaN	NaN	1.65	1.66	9.362	9.442	NaN	NaN	NaN	NaN	3.108	3.108
NaN	NaN	NaN	NaN	1.578	1.586	9.089	9.165	NaN	NaN	NaN	NaN	3.255	3.254
NaN	NaN	NaN	NaN	1.575	1.583	5.169	5.236	NaN	NaN	NaN	NaN	4.75	4.747
NaN	NaN	NaN	NaN	1.624	1.632	5.217	5.285	NaN	NaN	NaN	NaN	4.485	4.482
NaN	NaN	NaN	NaN	1.608	1.617	5.397	5.452	NaN	NaN	NaN	NaN	4.51	4.507
NaN	NaN	NaN	NaN	0.747	0.75	70.769	71.484	NaN	NaN	NaN	NaN	4.409	4.406
NaN	NaN	NaN	NaN	0.802	0.805	75.865	76.627	NaN	NaN	NaN	NaN	6.266	6.267
NaN	NaN	NaN	NaN	0.755	0.758	72.245	72.975	NaN	NaN	NaN	NaN	6.292	6.293
NaN	NaN	NaN	NaN	0.792	0.795	9.668	9.736	NaN	NaN	NaN	NaN	6.236	6.236
NaN	NaN	NaN	NaN	0.812	0.815	9.544	9.61	NaN	NaN	NaN	NaN	6.258	6.258
NaN	NaN	NaN	NaN	0.786	0.79	2.962	2.98	NaN	NaN	NaN	NaN	19.359	19.345
NaN	NaN	NaN	NaN	0.766	0.77	3.049	3.068	NaN	NaN	NaN	NaN	19.495	19.481
NaN	NaN	NaN	NaN	0.758	0.762	3.014	3.033	NaN	NaN	NaN	NaN	19.887	19.874
NaN	NaN	NaN	NaN	0.774	0.778	22.905	23.13	NaN	NaN	NaN	NaN	19.808	19.794
NaN	NaN	NaN	NaN	0.781	0.786	23.148	23.376	NaN	NaN	NaN	NaN	20.044	20.031
NaN	NaN	NaN	NaN	1.805	1.824	24.031	24.269	NaN	NaN	NaN	NaN	0.248	0.248
NaN	NaN	NaN	NaN	1.805	1.824	24.569	24.814	NaN	NaN	NaN	NaN	0.239	0.238
NaN	NaN	NaN	NaN	1.779	1.797	3.103	3.11	NaN	NaN	NaN	NaN	0.236	0.235
NaN	NaN	NaN	NaN	1.978	1.999	3.088	3.095	NaN	NaN	NaN	NaN	0.634	0.634
NaN	NaN	NaN	NaN	1.798	1.816	9.972	10.054	NaN	NaN	NaN	NaN	0.631	0.631
NaN	NaN	NaN	NaN	1.029	1.039	10.036	10.117	NaN	NaN	NaN	NaN	2.337	2.337
NaN	NaN	NaN	NaN	1.086	1.097	10.006	10.087	NaN	NaN	NaN	NaN	2.129	2.129
NaN	NaN	NaN	NaN	1.044	1.054	10.214	10.332	NaN	NaN	NaN	NaN	2.148	2.148
NaN	NaN	NaN	NaN	7.008	7.259	10.537	10.658	NaN	NaN	NaN	NaN	2.145	2.145
NaN	NaN	NaN	NaN	5.837	5.924	10.471	10.591	NaN	NaN	NaN	NaN	2.136	2.136
NaN	NaN	NaN	NaN	26.23	26.45	6.068	6.078	NaN	NaN	NaN	NaN	4.787	4.787
NaN	NaN	NaN	NaN	35.225	35.356	5.829	5.84	NaN	NaN	NaN	NaN	4.702	4.702
NaN	NaN	NaN	NaN	21.125	21.229	6.103	6.112	NaN	NaN	NaN	NaN	4.636	4.635
NaN	NaN	NaN	NaN	11.203	11.262	5.045	5.055	NaN	NaN	NaN	NaN	4.671	4.671
NaN	NaN	NaN	NaN	18.991	19.085	6.136	6.146	NaN	NaN	NaN	NaN	4.053	4.053
NaN	NaN	NaN	NaN	3.039	3.11	0.604	0.604	NaN	NaN	NaN	NaN	1.053	1.053
NaN	NaN	NaN	NaN	3.054	3.125	0.629	0.629	NaN	NaN	NaN	NaN	1.056	1.056
NaN	NaN	NaN	NaN	3.11	3.179	0.598	0.598	NaN	NaN	NaN	NaN	1.054	1.054
NaN	NaN	NaN	NaN	32.21	32.486	0.721	0.721	NaN	NaN	NaN	NaN	1.059	1.059
NaN	NaN	NaN	NaN	22.256	22.353	1.614	1.616	NaN	NaN	NaN	NaN	0.809	0.81
NaN	NaN	NaN	NaN	2.685	2.724	1.705	1.707	NaN	NaN	NaN	NaN	0.801	0.802
NaN	NaN	NaN	NaN	21.752	22.871	1.717	1.719	NaN	NaN	NaN	NaN	3.645	3.645
NaN	NaN	NaN	NaN	11.695	11.744	1.715	1.717	NaN	NaN	NaN	NaN	3.564	3.564
NaN	NaN	NaN	NaN	NaN	NaN	0.885	0.888	NaN	NaN	NaN	NaN	0.67	0.67
NaN	NaN	NaN	NaN	NaN	NaN	0.89	0.892	NaN	NaN	NaN	NaN	0.698	0.699
NaN	NaN	NaN	NaN	NaN	NaN	0.898	0.901	NaN	NaN	NaN	NaN	0.599	0.598
NaN	NaN	NaN	NaN	NaN	NaN	0.894	0.897	NaN	NaN	NaN	NaN	0.586	0.585
NaN	NaN	NaN	NaN	NaN	NaN	4.26	4.267	NaN	NaN	NaN	NaN	0.578	0.578
NaN	NaN	NaN	NaN	NaN	NaN	4.334	4.341	NaN	NaN	NaN	NaN	0.587	0.587
NaN	NaN	NaN	NaN	NaN	NaN	4.361	4.368	NaN	NaN	NaN	NaN	2.79	2.791
NaN	NaN	NaN	NaN	NaN	NaN	6.186	6.258	NaN	NaN	NaN	NaN	2.821	2.821
NaN	NaN	NaN	NaN	NaN	NaN	6.912	6.995	NaN	NaN	NaN	NaN	1.103	1.103
NaN	NaN	NaN	NaN	NaN	NaN	7.059	7.145	NaN	NaN	NaN	NaN	1.22	1.22
NaN	NaN	NaN	NaN	NaN	NaN	7.201	7.289	NaN	NaN	NaN	NaN	1.173	1.173
NaN	NaN	NaN	NaN	NaN	NaN	6.857	6.94	NaN	NaN	NaN	NaN	0.736	0.736
NaN	NaN	NaN	NaN	NaN	NaN	12.187	12.33	NaN	NaN	NaN	NaN	0.784	0.784
NaN	NaN	NaN	NaN	NaN	NaN	21.883	22.143	NaN	NaN	NaN	NaN	0.457	0.457
NaN	NaN	NaN	NaN	NaN	NaN	21.094	21.345	NaN	NaN	NaN	NaN	0.46	0.46
NaN	NaN	NaN	NaN	NaN	NaN	20.678	20.923	NaN	NaN	NaN	NaN	0.475	0.475
NaN	NaN	NaN	NaN	NaN	NaN	20.24	20.481	NaN	NaN	NaN	NaN	0.472	0.472
NaN	NaN	NaN	NaN	NaN	NaN	14.255	14.435	NaN	NaN	NaN	NaN	0.955	0.955
NaN	NaN	NaN	NaN	NaN	NaN	14.127	14.309	NaN	NaN	NaN	NaN	0.756	0.756
NaN	NaN	NaN	NaN	NaN	NaN	14.387	14.575	NaN	NaN	NaN	NaN	0.784	0.784
NaN	NaN	NaN	NaN	NaN	NaN	14.519	14.707	NaN	NaN	NaN	NaN	0.549	0.549
NaN	NaN	NaN	NaN	NaN	NaN	14.589	14.778	NaN	NaN	NaN	NaN	0.555	0.555
NaN	NaN	NaN	NaN	NaN	NaN	8.319	8.399	NaN	NaN	NaN	NaN	0.489	0.489
NaN	NaN	NaN	NaN	NaN	NaN	9.752	9.852	NaN	NaN	NaN	NaN	0.496	0.496
NaN	NaN	NaN	NaN	NaN	NaN	9.364	9.458	NaN	NaN	NaN	NaN	1.781	1.781
NaN	NaN	NaN	NaN	NaN	NaN	9.197	9.288	NaN	NaN	NaN	NaN	1.65	1.649
NaN	NaN	NaN	NaN	NaN	NaN	8.739	8.822	NaN	NaN	NaN	NaN	0.372	0.371
NaN	NaN	NaN	NaN	NaN	NaN	3.782	3.786	NaN	NaN	NaN	NaN	0.381	0.38
NaN	NaN	NaN	NaN	NaN	NaN	3.767	3.77	NaN	NaN	NaN	NaN	0.215	0.215
NaN	NaN	NaN	NaN	NaN	NaN	3.752	3.754	NaN	NaN	NaN	NaN	0.215	0.215
NaN	NaN	NaN	NaN	NaN	NaN	3.727	3.729	NaN	NaN	NaN	NaN	0.332	0.332
NaN	NaN	NaN	NaN	NaN	NaN	3.711	3.714	NaN	NaN	NaN	NaN	0.325	0.325
NaN	NaN	NaN	NaN	NaN	NaN	6.209	6.269	NaN	NaN	NaN	NaN	0.199	0.199
NaN	NaN	NaN	NaN	NaN	NaN	6.295	6.357	NaN	NaN	NaN	NaN	0.199	0.199
NaN	NaN	NaN	NaN	NaN	NaN	6.38	6.443	NaN	NaN	NaN	NaN	0.138	0.138
NaN	NaN	NaN	NaN	NaN	NaN	6.313	6.375	NaN	NaN	NaN	NaN	0.138	0.138
NaN	NaN	NaN	NaN	NaN	NaN	13.992	14.17	NaN	NaN	NaN	NaN	0.165	0.165
NaN	NaN	NaN	NaN	NaN	NaN	13.788	13.965	NaN	NaN	NaN	NaN	0.164	0.164
NaN	NaN	NaN	NaN	NaN	NaN	13.818	13.997	NaN	NaN	NaN	NaN	0.406	0.406
NaN	NaN	NaN	NaN	NaN	NaN	13.892	14.071	NaN	NaN	NaN	NaN	0.419	0.419
NaN	NaN	NaN	NaN	NaN	NaN	13.659	13.835	NaN	NaN	NaN	NaN	0.186	0.185
NaN	NaN	NaN	NaN	NaN	NaN	12.266	12.414	NaN	NaN	NaN	NaN	0.187	0.187
NaN	NaN	NaN	NaN	NaN	NaN	8.563	8.658	NaN	NaN	NaN	NaN	0.256	0.256
NaN	NaN	NaN	NaN	NaN	NaN	8.072	8.161	NaN	NaN	NaN	NaN	0.254	0.254
NaN	NaN	NaN	NaN	NaN	NaN	8.942	9.042	NaN	NaN	NaN	NaN	2.13	2.13
NaN	NaN	NaN	NaN	NaN	NaN	8.378	8.471	NaN	NaN	NaN	NaN	19.636	19.623
NaN	NaN	NaN	NaN	NaN	NaN	4.392	4.425	NaN	NaN	NaN	NaN	0.626	0.625
NaN	NaN	NaN	NaN	NaN	NaN	4.495	4.53	NaN	NaN	NaN	NaN	0.853	0.853
NaN	NaN	NaN	NaN	NaN	NaN	4.617	4.654	NaN	NaN	NaN	NaN	0.764	0.764
NaN	NaN	NaN	NaN	NaN	NaN	4.733	4.771	NaN	NaN	NaN	NaN	9.067	9.067
NaN	NaN	NaN	NaN	NaN	NaN	4	4.003	NaN	NaN	NaN	NaN	6.172	6.173
NaN	NaN	NaN	NaN	NaN	NaN	102.606	103.614	NaN	NaN	NaN	NaN	6.198	6.198
NaN	NaN	NaN	NaN	NaN	NaN	101.254	102.216	NaN	NaN	NaN	NaN	5.992	5.992
NaN	NaN	NaN	NaN	NaN	NaN	25.798	25.969	NaN	NaN	NaN	NaN	6.193	6.193
NaN	NaN	NaN	NaN	NaN	NaN	49.494	49.807	NaN	NaN	NaN	NaN	5.24	5.24
NaN	NaN	NaN	NaN	NaN	NaN	37.365	37.707	NaN	NaN	NaN	NaN	12.936	12.92
NaN	NaN	NaN	NaN	NaN	NaN	13.597	13.713	NaN	NaN	NaN	NaN	12.913	12.897
NaN	NaN	NaN	NaN	NaN	NaN	9.968	10.039	NaN	NaN	NaN	NaN	0.723	0.723
NaN	NaN	NaN	NaN	NaN	NaN	5.803	5.762	NaN	NaN	NaN	NaN	0.6	0.6
NaN	NaN	NaN	NaN	NaN	NaN	5.805	5.765	NaN	NaN	NaN	NaN	1.052	1.052
NaN	NaN	NaN	NaN	NaN	NaN	9.417	9.346	NaN	NaN	NaN	NaN	1.054	1.054
NaN	NaN	NaN	NaN	NaN	NaN	42.775	43.159	NaN	NaN	NaN	NaN	1.054	1.054
NaN	NaN	NaN	NaN	NaN	NaN	10.027	10.109	NaN	NaN	NaN	NaN	1.059	1.059
NaN	NaN	NaN	NaN	NaN	NaN	3.356	3.361	NaN	NaN	NaN	NaN	0.412	0.411
NaN	NaN	NaN	NaN	NaN	NaN	23.426	23.621	NaN	NaN	NaN	NaN	6.075	6.075
NaN	NaN	NaN	NaN	NaN	NaN	5.805	5.849	NaN	NaN	NaN	NaN	22.893	22.878
NaN	NaN	NaN	NaN	NaN	NaN	1.434	1.44	NaN	NaN	NaN	NaN	26.12	26.107
NaN	NaN	NaN	NaN	NaN	NaN	88.465	89.346	NaN	NaN	NaN	NaN	25.396	25.382
NaN	NaN	NaN	NaN	NaN	NaN	0.83	0.832	NaN	NaN	NaN	NaN	3.404	3.403
NaN	NaN	NaN	NaN	NaN	NaN	76.347	77.079	NaN	NaN	NaN	NaN	0.335	0.335
NaN	NaN	NaN	NaN	NaN	NaN	74.971	75.688	NaN	NaN	NaN	NaN	6.19	6.19
NaN	NaN	NaN	NaN	NaN	NaN	2.431	2.436	NaN	NaN	NaN	NaN	6.299	6.3
NaN	NaN	NaN	NaN	NaN	NaN	2.47	2.485	NaN	NaN	NaN	NaN	NaN	NaN
NaN	NaN	NaN	NaN	NaN	NaN	2.132	2.143	NaN	NaN	NaN	NaN	NaN	NaN
NaN	NaN	NaN	NaN	NaN	NaN	0.805	0.807	NaN	NaN	NaN	NaN	NaN	NaN
NaN	NaN	NaN	NaN	NaN	NaN	0.897	0.9	NaN	NaN	NaN	NaN	NaN	NaN
NaN	NaN	NaN	NaN	NaN	NaN	75.245	75.964	NaN	NaN	NaN	NaN	NaN	NaN
NaN	NaN	NaN	NaN	NaN	NaN	4.131	4.123	NaN	NaN	NaN	NaN	NaN	NaN
NaN	NaN	NaN	NaN	NaN	NaN	16.857	17.075	NaN	NaN	NaN	NaN	NaN	NaN
NaN	NaN	NaN	NaN	NaN	NaN	8.557	8.562	NaN	NaN	NaN	NaN	NaN	NaN
NaN	NaN	NaN	NaN	NaN	NaN	2.748	2.744	NaN	NaN	NaN	NaN	NaN	NaN
NaN	NaN	NaN	NaN	NaN	NaN	3.102	3.112	NaN	NaN	NaN	NaN	NaN	NaN
NaN	NaN	NaN	NaN	NaN	NaN	3.14	3.149	NaN	NaN	NaN	NaN	NaN	NaN
NaN	NaN	NaN	NaN	NaN	NaN	4.086	4.108	NaN	NaN	NaN	NaN	NaN	NaN
NaN	NaN	NaN	NaN	NaN	NaN	4.381	4.348	NaN	NaN	NaN	NaN	NaN	NaN
NaN	NaN	NaN	NaN	NaN	NaN	103.942	104.959	NaN	NaN	NaN	NaN	NaN	NaN
NaN	NaN	NaN	NaN	NaN	NaN	9.434	9.515	NaN	NaN	NaN	NaN	NaN	NaN
NaN	NaN	NaN	NaN	NaN	NaN	5.894	5.852	NaN	NaN	NaN	NaN	NaN	NaN
NaN	NaN	NaN	NaN	NaN	NaN	6.829	6.888	NaN	NaN	NaN	NaN	NaN	NaN
NaN	NaN	NaN	NaN	NaN	NaN	5.339	5.382	NaN	NaN	NaN	NaN	NaN	NaN
NaN	NaN	NaN	NaN	NaN	NaN	6.6	6.657	NaN	NaN	NaN	NaN	NaN	NaN
NaN	NaN	NaN	NaN	NaN	NaN	5.468	5.512	NaN	NaN	NaN	NaN	NaN	NaN
NaN	NaN	NaN	NaN	NaN	NaN	5.767	5.815	NaN	NaN	NaN	NaN	NaN	NaN
NaN	NaN	NaN	NaN	NaN	NaN	11.842	11.949	NaN	NaN	NaN	NaN	NaN	NaN
NaN	NaN	NaN	NaN	NaN	NaN	6.345	6.4	NaN	NaN	NaN	NaN	NaN	NaN
NaN	NaN	NaN	NaN	NaN	NaN	3.619	3.644	NaN	NaN	NaN	NaN	NaN	NaN
NaN	NaN	NaN	NaN	NaN	NaN	5.236	5.278	NaN	NaN	NaN	NaN	NaN	NaN
NaN	NaN	NaN	NaN	NaN	NaN	4.185	4.216	NaN	NaN	NaN	NaN	NaN	NaN
NaN	NaN	NaN	NaN	NaN	NaN	29.567	29.863	NaN	NaN	NaN	NaN	NaN	NaN
NaN	NaN	NaN	NaN	NaN	NaN	31.002	31.314	NaN	NaN	NaN	NaN	NaN	NaN
NaN	NaN	NaN	NaN	NaN	NaN	30.398	30.704	NaN	NaN	NaN	NaN	NaN	NaN
NaN	NaN	NaN	NaN	NaN	NaN	35.396	35.761	NaN	NaN	NaN	NaN	NaN	NaN
NaN	NaN	NaN	NaN	NaN	NaN	34.531	34.886	NaN	NaN	NaN	NaN	NaN	NaN
NaN	NaN	NaN	NaN	NaN	NaN	30.197	30.5	NaN	NaN	NaN	NaN	NaN	NaN
NaN	NaN	NaN	NaN	NaN	NaN	33.879	34.222	NaN	NaN	NaN	NaN	NaN	NaN
NaN	NaN	NaN	NaN	NaN	NaN	36.165	36.538	NaN	NaN	NaN	NaN	NaN	NaN
NaN	NaN	NaN	NaN	NaN	NaN	30.019	30.321	NaN	NaN	NaN	NaN	NaN	NaN
NaN	NaN	NaN	NaN	NaN	NaN	21.754	21.912	NaN	NaN	NaN	NaN	NaN	NaN
NaN	NaN	NaN	NaN	NaN	NaN	18.246	18.399	NaN	NaN	NaN	NaN	NaN	NaN
NaN	NaN	NaN	NaN	NaN	NaN	19.749	19.906	NaN	NaN	NaN	NaN	NaN	NaN
NaN	NaN	NaN	NaN	NaN	NaN	19.247	19.404	NaN	NaN	NaN	NaN	NaN	NaN
NaN	NaN	NaN	NaN	NaN	NaN	18.92	19.074	NaN	NaN	NaN	NaN	NaN	NaN
NaN	NaN	NaN	NaN	NaN	NaN	21.921	22.081	NaN	NaN	NaN	NaN	NaN	NaN
NaN	NaN	NaN	NaN	NaN	NaN	16.881	17.032	NaN	NaN	NaN	NaN	NaN	NaN
NaN	NaN	NaN	NaN	NaN	NaN	17.467	17.622	NaN	NaN	NaN	NaN	NaN	NaN
NaN	NaN	NaN	NaN	NaN	NaN	5.201	5.237	NaN	NaN	NaN	NaN	NaN	NaN
NaN	NaN	NaN	NaN	NaN	NaN	5.518	5.557	NaN	NaN	NaN	NaN	NaN	NaN
NaN	NaN	NaN	NaN	NaN	NaN	5.293	5.329	NaN	NaN	NaN	NaN	NaN	NaN
NaN	NaN	NaN	NaN	NaN	NaN	5.396	5.434	NaN	NaN	NaN	NaN	NaN	NaN
NaN	NaN	NaN	NaN	NaN	NaN	5.278	5.314	NaN	NaN	NaN	NaN	NaN	NaN
NaN	NaN	NaN	NaN	NaN	NaN	1.348	1.35	NaN	NaN	NaN	NaN	NaN	NaN
NaN	NaN	NaN	NaN	NaN	NaN	1.335	1.337	NaN	NaN	NaN	NaN	NaN	NaN
NaN	NaN	NaN	NaN	NaN	NaN	1.324	1.325	NaN	NaN	NaN	NaN	NaN	NaN
NaN	NaN	NaN	NaN	NaN	NaN	1.336	1.338	NaN	NaN	NaN	NaN	NaN	NaN
NaN	NaN	NaN	NaN	NaN	NaN	2.56	2.57	NaN	NaN	NaN	NaN	NaN	NaN
NaN	NaN	NaN	NaN	NaN	NaN	2.133	2.141	NaN	NaN	NaN	NaN	NaN	NaN
NaN	NaN	NaN	NaN	NaN	NaN	2.699	2.712	NaN	NaN	NaN	NaN	NaN	NaN
NaN	NaN	NaN	NaN	NaN	NaN	2.023	2.03	NaN	NaN	NaN	NaN	NaN	NaN
NaN	NaN	NaN	NaN	NaN	NaN	2.519	2.53	NaN	NaN	NaN	NaN	NaN	NaN
NaN	NaN	NaN	NaN	NaN	NaN	2.373	2.383	NaN	NaN	NaN	NaN	NaN	NaN
NaN	NaN	NaN	NaN	NaN	NaN	1.893	1.899	NaN	NaN	NaN	NaN	NaN	NaN
NaN	NaN	NaN	NaN	NaN	NaN	14.817	14.943	NaN	NaN	NaN	NaN	NaN	NaN
NaN	NaN	NaN	NaN	NaN	NaN	15.025	15.154	NaN	NaN	NaN	NaN	NaN	NaN
NaN	NaN	NaN	NaN	NaN	NaN	16.456	16.599	NaN	NaN	NaN	NaN	NaN	NaN
NaN	NaN	NaN	NaN	NaN	NaN	14.737	14.862	NaN	NaN	NaN	NaN	NaN	NaN
NaN	NaN	NaN	NaN	NaN	NaN	21.985	22.212	NaN	NaN	NaN	NaN	NaN	NaN
NaN	NaN	NaN	NaN	NaN	NaN	18.956	19.18	NaN	NaN	NaN	NaN	NaN	NaN
NaN	NaN	NaN	NaN	NaN	NaN	20.635	20.857	NaN	NaN	NaN	NaN	NaN	NaN
NaN	NaN	NaN	NaN	NaN	NaN	22.608	22.851	NaN	NaN	NaN	NaN	NaN	NaN
NaN	NaN	NaN	NaN	NaN	NaN	18.42	18.615	NaN	NaN	NaN	NaN	NaN	NaN
NaN	NaN	NaN	NaN	NaN	NaN	18.484	18.678	NaN	NaN	NaN	NaN	NaN	NaN
NaN	NaN	NaN	NaN	NaN	NaN	22.561	22.817	NaN	NaN	NaN	NaN	NaN	NaN
NaN	NaN	NaN	NaN	NaN	NaN	17.681	17.885	NaN	NaN	NaN	NaN	NaN	NaN
NaN	NaN	NaN	NaN	NaN	NaN	24.799	25.08	NaN	NaN	NaN	NaN	NaN	NaN
NaN	NaN	NaN	NaN	NaN	NaN	26.077	26.36	NaN	NaN	NaN	NaN	NaN	NaN
NaN	NaN	NaN	NaN	NaN	NaN	23.146	23.393	NaN	NaN	NaN	NaN	NaN	NaN
NaN	NaN	NaN	NaN	NaN	NaN	23.364	23.629	NaN	NaN	NaN	NaN	NaN	NaN
NaN	NaN	NaN	NaN	NaN	NaN	29.114	29.449	NaN	NaN	NaN	NaN	NaN	NaN
NaN	NaN	NaN	NaN	NaN	NaN	21.214	21.427	NaN	NaN	NaN	NaN	NaN	NaN
NaN	NaN	NaN	NaN	NaN	NaN	14.694	14.824	NaN	NaN	NaN	NaN	NaN	NaN
NaN	NaN	NaN	NaN	NaN	NaN	17.73	17.89	NaN	NaN	NaN	NaN	NaN	NaN
NaN	NaN	NaN	NaN	NaN	NaN	20.302	20.491	NaN	NaN	NaN	NaN	NaN	NaN
NaN	NaN	NaN	NaN	NaN	NaN	6.096	6.136	NaN	NaN	NaN	NaN	NaN	NaN
NaN	NaN	NaN	NaN	NaN	NaN	6.491	6.534	NaN	NaN	NaN	NaN	NaN	NaN
NaN	NaN	NaN	NaN	NaN	NaN	9.947	10.027	NaN	NaN	NaN	NaN	NaN	NaN
NaN	NaN	NaN	NaN	NaN	NaN	6.622	6.667	NaN	NaN	NaN	NaN	NaN	NaN
NaN	NaN	NaN	NaN	NaN	NaN	1.979	1.985	NaN	NaN	NaN	NaN	NaN	NaN
NaN	NaN	NaN	NaN	NaN	NaN	2.125	2.133	NaN	NaN	NaN	NaN	NaN	NaN
NaN	NaN	NaN	NaN	NaN	NaN	2.071	2.078	NaN	NaN	NaN	NaN	NaN	NaN
NaN	NaN	NaN	NaN	NaN	NaN	2.328	2.336	NaN	NaN	NaN	NaN	NaN	NaN
NaN	NaN	NaN	NaN	NaN	NaN	1.968	1.974	NaN	NaN	NaN	NaN	NaN	NaN
NaN	NaN	NaN	NaN	NaN	NaN	1.931	1.935	NaN	NaN	NaN	NaN	NaN	NaN
NaN	NaN	NaN	NaN	NaN	NaN	1.955	1.959	NaN	NaN	NaN	NaN	NaN	NaN
NaN	NaN	NaN	NaN	NaN	NaN	2.02	2.025	NaN	NaN	NaN	NaN	NaN	NaN
NaN	NaN	NaN	NaN	NaN	NaN	1.95	1.954	NaN	NaN	NaN	NaN	NaN	NaN
NaN	NaN	NaN	NaN	NaN	NaN	1.436	1.437	NaN	NaN	NaN	NaN	NaN	NaN
NaN	NaN	NaN	NaN	NaN	NaN	1.431	1.433	NaN	NaN	NaN	NaN	NaN	NaN
NaN	NaN	NaN	NaN	NaN	NaN	1.45	1.452	NaN	NaN	NaN	NaN	NaN	NaN
NaN	NaN	NaN	NaN	NaN	NaN	1.42	1.422	NaN	NaN	NaN	NaN	NaN	NaN
NaN	NaN	NaN	NaN	NaN	NaN	12.424	12.483	NaN	NaN	NaN	NaN	NaN	NaN
NaN	NaN	NaN	NaN	NaN	NaN	13.226	13.291	NaN	NaN	NaN	NaN	NaN	NaN
NaN	NaN	NaN	NaN	NaN	NaN	3.603	3.626	NaN	NaN	NaN	NaN	NaN	NaN
NaN	NaN	NaN	NaN	NaN	NaN	12.427	12.483	NaN	NaN	NaN	NaN	NaN	NaN
NaN	NaN	NaN	NaN	NaN	NaN	12.337	12.396	NaN	NaN	NaN	NaN	NaN	NaN
NaN	NaN	NaN	NaN	NaN	NaN	12.639	12.7	NaN	NaN	NaN	NaN	NaN	NaN
NaN	NaN	NaN	NaN	NaN	NaN	13.307	13.372	NaN	NaN	NaN	NaN	NaN	NaN
NaN	NaN	NaN	NaN	NaN	NaN	13.581	13.647	NaN	NaN	NaN	NaN	NaN	NaN
NaN	NaN	NaN	NaN	NaN	NaN	10.185	10.222	NaN	NaN	NaN	NaN	NaN	NaN
NaN	NaN	NaN	NaN	NaN	NaN	12.129	12.183	NaN	NaN	NaN	NaN	NaN	NaN
NaN	NaN	NaN	NaN	NaN	NaN	11.483	11.536	NaN	NaN	NaN	NaN	NaN	NaN
NaN	NaN	NaN	NaN	NaN	NaN	22.674	22.776	NaN	NaN	NaN	NaN	NaN	NaN
NaN	NaN	NaN	NaN	NaN	NaN	29.988	30.127	NaN	NaN	NaN	NaN	NaN	NaN
NaN	NaN	NaN	NaN	NaN	NaN	19.055	19.136	NaN	NaN	NaN	NaN	NaN	NaN
NaN	NaN	NaN	NaN	NaN	NaN	22.758	22.85	NaN	NaN	NaN	NaN	NaN	NaN
NaN	NaN	NaN	NaN	NaN	NaN	32.704	32.874	NaN	NaN	NaN	NaN	NaN	NaN
NaN	NaN	NaN	NaN	NaN	NaN	24.666	24.774	NaN	NaN	NaN	NaN	NaN	NaN
NaN	NaN	NaN	NaN	NaN	NaN	24.141	24.235	NaN	NaN	NaN	NaN	NaN	NaN
NaN	NaN	NaN	NaN	NaN	NaN	8.539	8.587	NaN	NaN	NaN	NaN	NaN	NaN
NaN	NaN	NaN	NaN	NaN	NaN	8.696	8.746	NaN	NaN	NaN	NaN	NaN	NaN
NaN	NaN	NaN	NaN	NaN	NaN	8.783	8.834	NaN	NaN	NaN	NaN	NaN	NaN
NaN	NaN	NaN	NaN	NaN	NaN	9.011	9.062	NaN	NaN	NaN	NaN	NaN	NaN
NaN	NaN	NaN	NaN	NaN	NaN	7.912	7.916	NaN	NaN	NaN	NaN	NaN	NaN
NaN	NaN	NaN	NaN	NaN	NaN	7.018	7.018	NaN	NaN	NaN	NaN	NaN	NaN
NaN	NaN	NaN	NaN	NaN	NaN	7.199	7.201	NaN	NaN	NaN	NaN	NaN	NaN
NaN	NaN	NaN	NaN	NaN	NaN	19.032	19.092	NaN	NaN	NaN	NaN	NaN	NaN
NaN	NaN	NaN	NaN	NaN	NaN	18.233	18.294	NaN	NaN	NaN	NaN	NaN	NaN
NaN	NaN	NaN	NaN	NaN	NaN	18.816	18.877	NaN	NaN	NaN	NaN	NaN	NaN
NaN	NaN	NaN	NaN	NaN	NaN	18.632	18.757	NaN	NaN	NaN	NaN	NaN	NaN
NaN	NaN	NaN	NaN	NaN	NaN	15.341	15.437	NaN	NaN	NaN	NaN	NaN	NaN
NaN	NaN	NaN	NaN	NaN	NaN	20.223	20.344	NaN	NaN	NaN	NaN	NaN	NaN
NaN	NaN	NaN	NaN	NaN	NaN	16.319	16.416	NaN	NaN	NaN	NaN	NaN	NaN
NaN	NaN	NaN	NaN	NaN	NaN	17.336	17.445	NaN	NaN	NaN	NaN	NaN	NaN
NaN	NaN	NaN	NaN	NaN	NaN	15.547	15.55	NaN	NaN	NaN	NaN	NaN	NaN
NaN	NaN	NaN	NaN	NaN	NaN	12.152	12.159	NaN	NaN	NaN	NaN	NaN	NaN
NaN	NaN	NaN	NaN	NaN	NaN	14.774	14.774	NaN	NaN	NaN	NaN	NaN	NaN
NaN	NaN	NaN	NaN	NaN	NaN	4.304	4.33	NaN	NaN	NaN	NaN	NaN	NaN
NaN	NaN	NaN	NaN	NaN	NaN	4.34	4.367	NaN	NaN	NaN	NaN	NaN	NaN
NaN	NaN	NaN	NaN	NaN	NaN	4.272	4.298	NaN	NaN	NaN	NaN	NaN	NaN
NaN	NaN	NaN	NaN	NaN	NaN	1.852	1.86	NaN	NaN	NaN	NaN	NaN	NaN
NaN	NaN	NaN	NaN	NaN	NaN	1.899	1.907	NaN	NaN	NaN	NaN	NaN	NaN
NaN	NaN	NaN	NaN	NaN	NaN	1.913	1.921	NaN	NaN	NaN	NaN	NaN	NaN
NaN	NaN	NaN	NaN	NaN	NaN	1.54	1.545	NaN	NaN	NaN	NaN	NaN	NaN
NaN	NaN	NaN	NaN	NaN	NaN	1.563	1.568	NaN	NaN	NaN	NaN	NaN	NaN
NaN	NaN	NaN	NaN	NaN	NaN	1.467	1.472	NaN	NaN	NaN	NaN	NaN	NaN
NaN	NaN	NaN	NaN	NaN	NaN	44.218	44.712	NaN	NaN	NaN	NaN	NaN	NaN
NaN	NaN	NaN	NaN	NaN	NaN	41.552	42.017	NaN	NaN	NaN	NaN	NaN	NaN
NaN	NaN	NaN	NaN	NaN	NaN	40.618	41.071	NaN	NaN	NaN	NaN	NaN	NaN
NaN	NaN	NaN	NaN	NaN	NaN	37.63	38.046	NaN	NaN	NaN	NaN	NaN	NaN
NaN	NaN	NaN	NaN	NaN	NaN	40.72	41.174	NaN	NaN	NaN	NaN	NaN	NaN
NaN	NaN	NaN	NaN	NaN	NaN	38.167	38.585	NaN	NaN	NaN	NaN	NaN	NaN
NaN	NaN	NaN	NaN	NaN	NaN	42.607	43.086	NaN	NaN	NaN	NaN	NaN	NaN
NaN	NaN	NaN	NaN	NaN	NaN	43.916	44.411	NaN	NaN	NaN	NaN	NaN	NaN
NaN	NaN	NaN	NaN	NaN	NaN	44.761	45.262	NaN	NaN	NaN	NaN	NaN	NaN
NaN	NaN	NaN	NaN	NaN	NaN	38.073	38.5	NaN	NaN	NaN	NaN	NaN	NaN
NaN	NaN	NaN	NaN	NaN	NaN	20.423	20.569	NaN	NaN	NaN	NaN	NaN	NaN
NaN	NaN	NaN	NaN	NaN	NaN	20.675	20.823	NaN	NaN	NaN	NaN	NaN	NaN
NaN	NaN	NaN	NaN	NaN	NaN	17.401	17.526	NaN	NaN	NaN	NaN	NaN	NaN
NaN	NaN	NaN	NaN	NaN	NaN	16.272	16.392	NaN	NaN	NaN	NaN	NaN	NaN
NaN	NaN	NaN	NaN	NaN	NaN	15.621	15.733	NaN	NaN	NaN	NaN	NaN	NaN
NaN	NaN	NaN	NaN	NaN	NaN	17.9	18.029	NaN	NaN	NaN	NaN	NaN	NaN
NaN	NaN	NaN	NaN	NaN	NaN	7.316	7.327	NaN	NaN	NaN	NaN	NaN	NaN
NaN	NaN	NaN	NaN	NaN	NaN	6.286	6.291	NaN	NaN	NaN	NaN	NaN	NaN
NaN	NaN	NaN	NaN	NaN	NaN	5.089	5.094	NaN	NaN	NaN	NaN	NaN	NaN
NaN	NaN	NaN	NaN	NaN	NaN	18.586	18.731	NaN	NaN	NaN	NaN	NaN	NaN
NaN	NaN	NaN	NaN	NaN	NaN	18.468	18.612	NaN	NaN	NaN	NaN	NaN	NaN
NaN	NaN	NaN	NaN	NaN	NaN	14.448	14.552	NaN	NaN	NaN	NaN	NaN	NaN
NaN	NaN	NaN	NaN	NaN	NaN	19.417	19.572	NaN	NaN	NaN	NaN	NaN	NaN
NaN	NaN	NaN	NaN	NaN	NaN	17.064	17.194	NaN	NaN	NaN	NaN	NaN	NaN
NaN	NaN	NaN	NaN	NaN	NaN	20.156	20.317	NaN	NaN	NaN	NaN	NaN	NaN
NaN	NaN	NaN	NaN	NaN	NaN	12.444	12.525	NaN	NaN	NaN	NaN	NaN	NaN
NaN	NaN	NaN	NaN	NaN	NaN	21.617	21.792	NaN	NaN	NaN	NaN	NaN	NaN
NaN	NaN	NaN	NaN	NaN	NaN	19.563	19.719	NaN	NaN	NaN	NaN	NaN	NaN
NaN	NaN	NaN	NaN	NaN	NaN	9.252	9.13	NaN	NaN	NaN	NaN	NaN	NaN
NaN	NaN	NaN	NaN	NaN	NaN	10.123	9.988	NaN	NaN	NaN	NaN	NaN	NaN
NaN	NaN	NaN	NaN	NaN	NaN	9.32	9.209	NaN	NaN	NaN	NaN	NaN	NaN
NaN	NaN	NaN	NaN	NaN	NaN	10.136	10.007	NaN	NaN	NaN	NaN	NaN	NaN
NaN	NaN	NaN	NaN	NaN	NaN	9.856	9.733	NaN	NaN	NaN	NaN	NaN	NaN
[truncated: 6,001 more rows]

## Sheet: Fig2.c
NC	NC	NEC	NEC	CC	CC	EC	EC	SC	SC	NWC	NWC	NSC	NSC
36.605	47.882	5.233	4.004	34.67	41.349	63.681	92.1	4.617	2.584	22.851	24.825	26.446	18.168
11.403	14.748	5.133	3.945	34.53	41.219	64.034	92.239	5.371	2.912	16.34	17.682	24.743	16.882
28.496	37.182	5.17	3.96	34.189	40.846	55.4	79.594	8.475	4.286	12.475	13.447	28.53	19.629
37.395	48.877	6.061	4.577	32.315	38.673	65.449	94.878	12.78	6.2	18.802	20.378	32.769	22.334
25.979	33.876	5.316	4.076	34.835	41.499	57.6	82.647	5.39	2.91	18.922	20.514	19.659	13.361
28.719	37.544	5.968	4.526	34.797	41.45	64.528	99.942	6.011	3.092	21.122	22.922	23.916	16.352
24.149	31.55	5.612	4.271	33.316	39.789	63.414	91.567	5.23	2.853	20.483	22.22	30.966	21.093
13.491	17.481	5.395	4.125	34.787	41.498	43.026	62.061	12.104	5.776	18.538	20.069	23.249	15.935
7.637	9.73	5.867	4.451	33.605	40.337	62.271	89.554	5.871	3.136	7.628	8.132	20.127	13.814
13.844	17.988	5.931	4.492	61.246	73.948	58.526	84.136	7.583	3.434	7.498	7.989	27.401	18.684
22.705	29.623	6.787	5.073	71.403	85.995	71.398	115.277	1.551	1.244	23.476	25.508	23.465	16.047
27.108	35.49	3.033	2.886	78.418	94.374	66.996	109.649	1.559	1.247	16.062	17.374	32.572	22.18
42.636	53.715	3.139	2.992	65.874	79.411	69.969	113.537	1.819	1.464	12.958	13.975	21.79	14.928
43.144	54.466	2.814	2.702	58.791	71.145	69.02	112.85	1.763	1.484	4.254	4.747	31.529	21.454
43.754	55.287	2.665	2.553	45.416	54.946	72.108	116.933	1.703	1.316	5.632	6.302	28.893	19.73
43.181	54.378	2.589	2.491	73.528	88.549	71.644	115.758	2.721	1.908	1.148	1.249	19.266	13.258
42.402	53.338	2.812	2.711	46.119	55.824	57.118	96.931	1.865	1.531	3.687	4.105	19.411	13.353
41.696	52.48	4.816	4.634	84.626	101.767	64.638	107.071	1.245	1.034	3.489	3.883	5.321	3.984
42.424	53.689	1.878	1.766	13.406	16.706	78.272	124.691	2.069	1.539	3.645	4.055	4.408	3.394
40.287	50.648	1.585	1.501	4.146	4.899	53.265	87.977	1.802	1.375	3.776	4.2	5.422	4.052
39.576	49.729	1.024	0.964	3.927	4.553	56.45	93.133	2.657	1.885	3.044	3.386	4.916	3.726
8.399	9.72	4.269	3.475	4.092	4.817	55.073	90.706	1.168	1.016	2.838	3.156	4.996	3.772
11.735	14.71	4.081	3.321	4.04	4.686	55.49	91.227	1.026	0.95	2.319	2.616	5.626	4.18
29.293	36.572	3.756	3.054	4.183	4.87	55.882	92.244	1.724	1.324	4.025	4.548	5.332	3.99
10.104	12.031	4.187	3.408	4.378	5.19	53.143	87.579	1.439	1.24	3.984	4.502	6.798	4.814
29.652	37.707	4.03	3.279	4.197	4.926	57.527	94.882	2.645	1.648	3.587	4.052	3.66	2.686
21.924	29.233	3.877	3.14	4.212	4.889	56.636	92.811	2.986	1.818	4.106	4.649	3.33	2.465
22.878	30.509	3.108	2.526	3.994	4.606	39.146	64.613	3.17	1.908	3.949	4.471	3.754	2.75
22.73	30.266	4.432	3.594	4.61	5.5	37.519	61.925	2.185	1.442	2.751	3.045	3.785	2.758
22.031	29.403	3.604	2.928	2.59	2.857	34.523	56.944	1.984	1.34	2.663	2.949	2.541	1.933
22.67	30.263	3.634	2.953	2.391	2.61	41.667	68.806	1.677	1.144	3.177	3.518	2.845	2.138
22.506	30.016	7.521	5.547	2.674	2.953	32.529	53.731	2.307	1.522	2.893	3.202	3.65	2.679
20.168	26.921	7.809	5.755	2.202	2.383	2.603	3.975	2.34	1.541	2.794	3.094	3.335	2.468
23.086	30.724	2.966	2.364	3.096	3.475	2.605	3.982	2.15	1.473	2.537	2.798	3.146	2.342
23.954	31.939	6.741	5.033	2.318	2.568	1.949	2.837	2.184	1.49	2.555	2.821	0.985	0.748
23.055	30.682	6.277	4.773	2.731	3.071	2.214	3.301	2.086	1.461	23.893	25.954	0.962	0.733
22.623	30.08	6.66	5.006	2.452	2.739	13.911	26.417	2.158	1.495	24.796	26.956	0.922	0.701
23.687	31.567	6.265	4.75	2.366	2.629	12.787	24.283	1.376	1.043	24.66	26.805	1.026	0.777
22.065	29.297	6.449	4.856	2.46	2.743	13.955	26.327	1.364	1.038	25.357	27.576	0.997	0.757
5.993	6.094	6.953	5.181	2.1	2.318	12.418	23.609	1.359	1.032	4.97	5.301	1.008	0.764
5.966	5.928	5.678	4.295	3.204	3.643	13.356	25.238	1.37	1.04	5.189	5.533	0.977	0.741
6.088	6.192	5.867	4.371	2.14	2.187	12.741	24.104	7.749	4.13	7.337	7.838	0.278	0.26
6.121	6.219	6.346	4.763	19.556	23.453	12.698	24.233	7.642	4.065	7.75	8.275	0.28	0.261
6.207	6.366	1.963	1.747	20.139	24.155	111.967	157.403	8.081	4.263	0.741	0.786	0.275	0.257
14.07	17.502	1.985	1.753	20.036	24.031	113	158.159	7.059	3.824	0.786	0.835	0.282	0.263
13.856	17.217	1.958	1.743	19.645	23.561	120.625	165.38	6.366	3.501	0.782	0.83	0.265	0.247
13.764	17.112	1.936	1.72	19.489	23.374	111.458	156.765	9.54	5.439	0.805	0.855	0.272	0.255
14.074	17.514	1.114	1.051	19.931	23.902	59.95	97.03	9.845	5.589	5.847	6.249	2.049	1.578
29.63	39.209	0.974	0.925	20.131	24.144	67.482	109.225	10.168	5.755	5.387	5.758	0.728	0.566
30.243	40.017	1.081	1.022	10.895	12.841	62.383	100.631	4.267	2.73	6	6.414	0.743	0.577
28.94	38.247	1.099	1.034	12.012	14.167	61.73	99.999	3.079	2.175	5.898	6.304	0.74	0.575
29.578	39.147	1.92	1.739	12.112	14.271	61.762	99.15	1.877	1.336	5.532	5.911	2.645	2.332
29.18	38.59	2.017	1.801	12.224	14.392	61.41	98.605	1.887	1.333	5.877	6.248	2.643	2.328
29.929	39.609	1.519	1.436	12.088	14.283	64.809	104.93	1.923	1.351	6.232	6.662	2.561	2.26
2.641	3.204	2.366	2.238	20.496	24.491	66.561	107.939	1.893	1.338	6.159	6.581	2.566	2.268
2.673	3.245	2.424	2.293	20.739	24.788	92.017	143.695	1.209	0.948	5.502	5.902	8.872	5.965
2.667	3.237	2.404	2.273	19.862	23.747	99.723	152.781	1.284	0.989	5.465	5.857	8.527	5.744
2.697	3.275	2.439	2.307	22.151	26.437	96.508	148.833	1.247	0.968	5.627	6.024	8.591	5.785
2.394	2.892	3.975	3.133	28.835	35.154	89.021	140.134	1.139	0.907	5.97	6.389	8.676	5.839
4.064	4.904	3.51	2.808	28.651	34.901	95.315	147.997	1.068	0.866	1.378	1.495	7.517	5.1
4.493	5.414	4.361	3.402	28.082	34.119	109.097	162.265	1.319	1.009	1.37	1.486	9.424	6.318
4.191	5.054	3.434	2.757	28.781	35.127	116.61	174.613	1.069	0.871	1.338	1.451	1.282	1.001
4.836	5.826	3.28	2.65	38.102	45.122	122.988	173.574	1.213	0.952	1.717	1.879	1.184	0.927
4.656	5.61	3.398	2.73	37.894	44.871	123.645	175.825	0.961	0.842	3.562	4.05	1.319	1.028
42.799	55.172	2.756	2.269	38.115	45.141	44.31	72.537	0.955	0.817	3.638	4.137	1.244	0.973
41.546	53.607	4.81	3.727	38.969	46.167	47.88	77.841	0.959	0.818	5.081	5.776	16.124	10.921
42.068	54.281	4.969	3.807	6.567	7.787	85.788	135.586	0.97	0.825	4.582	5.21	15.56	10.526
42.88	55.204	4.4	3.458	6.455	7.652	49.847	80.957	0.965	0.822	0.998	1.059	14.529	9.808
9.082	12.926	4.482	3.502	6.508	7.718	9.932	17.897	2.989	1.597	1.017	1.079	15.105	10.208
10.215	14.533	4.562	3.56	6.422	7.613	11.244	20.216	2.917	1.565	0.925	0.978	14.329	9.528
9.91	14.097	5.117	3.943	5.82	6.746	10.416	18.775	2.959	1.584	1.128	1.207	14.423	9.563
8.4	11.225	2.065	1.729	6.707	7.827	15.489	27.472	2.767	1.495	0.678	0.71	14.339	9.536
8.56	11.375	2.361	1.954	7.171	8.409	9.608	17.339	3.083	1.616	1.234	1.317	14.551	9.668
8.342	11.146	2.334	1.934	6.504	7.573	4.181	6.89	3.049	2.296	1.161	1.236	2.533	2.162
16.428	21.409	2.196	1.829	5.673	6.576	4.138	6.798	3.02	2.278	1.106	1.176	2.471	2.106
16.342	21.256	2.045	1.712	10.927	13.266	4.438	7.34	2.895	2.206	3.505	3.696	2.513	2.142
16.374	21.347	2.212	1.841	10.998	13.352	3.956	6.454	2.737	2.034	3.191	3.36	2.45	2.082
16.369	21.298	2.172	2.067	11.023	13.399	6.122	10.963	2.638	2.051	3.326	3.505	14.581	10.388
12.899	18.517	2.138	2.03	10.477	13.595	6.004	10.722	1.977	1.607	3.072	3.234	15.094	10.734
12.844	18.441	2.069	1.962	12.978	16.715	6.321	11.369	1.043	0.857	1.088	1.158	14.673	10.464
12.118	17.367	2.166	2.06	12.666	16.344	5.861	10.432	1.011	0.843	0.988	1.05	16.217	11.482
5.084	6.803	2.226	2.114	14.624	18.777	40.902	67.446	0.987	0.832	0.988	1.05	16.188	11.453
6.68	9.221	6.564	4.985	11.216	14.495	28.216	46.604	0.985	0.831	0.979	1.041	14.091	10.084
12.325	17.666	6.877	5.191	10.822	14.042	2.475	3.75	1.041	0.856	3.782	4.038	5.972	4.309
10.161	14.448	5.88	4.478	4.744	5.821	44.901	73.901	0.99	0.835	3.597	3.84	5.967	4.306
13.39	19.261	6.84	5.186	4.495	5.491	34.262	56.511	1.569	1.246	3.548	3.785	6.084	4.379
7.79	10.868	6.414	4.859	4.767	5.843	40.498	66.79	1.803	1.403	1.151	1.249	5.956	4.296
2.798	3.744	7.292	5.481	4.804	5.893	38.383	63.645	1.722	1.35	1.132	1.228	6.03	4.345
2.882	3.882	3.05	2.508	5.422	6.693	34.679	57.659	1.565	1.248	2.842	3.182	0.966	0.766
2.972	4.026	3.062	2.516	2.191	2.368	43.082	71.264	1.66	1.07	2.844	3.184	1.002	0.793
2.814	3.783	3.063	2.515	2.178	2.347	43.152	71.064	1.646	1.063	1.978	2.121	2.556	2.493
2.961	4.019	3.247	2.674	2.035	2.246	29.765	49.06	1.637	1.062	2.853	3.107	2.67	2.597
2.951	3.988	3.095	2.54	1.763	1.916	36.395	57.568	2.391	1.979	2.433	2.634	2.753	2.667
2.688	3.588	6.306	4.918	2.862	3.252	45.331	73.525	2.397	1.976	1.285	1.399	2.665	2.586
2.841	3.808	6.228	4.86	5.25	6.492	36.561	57.977	2.415	1.99	1.332	1.451	10.958	7.854
6.801	9.415	6.137	4.794	5.338	6.587	42.45	68.247	18.243	8.054	1.559	1.694	10.258	7.371
5.839	8.031	6.088	4.754	5.338	6.603	49.153	79.342	17.782	7.876	1.548	1.683	11.485	8.223
7.915	10.989	6.433	5.01	5.349	6.616	43.836	70.431	17.815	7.902	2.91	3.164	8.144	5.888
6.289	8.696	4.134	3.201	9.612	12.444	42.881	69.239	1.713	1.331	2.92	3.175	9.765	6.77
6.814	9.426	3.473	2.772	9.596	12.426	7.329	11.486	1.685	1.314	2.002	2.196	9.575	6.658
7.58	10.493	3.273	2.621	9.627	12.476	8.778	13.79	1.696	1.322	2.001	2.195	9.689	6.726
1.544	1.75	3.532	2.842	9.716	12.513	11.352	17.945	3.704	2.018	1.752	1.859	9.81	6.797
1.517	1.724	3.337	2.702	11.906	14.001	8.019	12.591	3.489	1.919	2.433	2.588	7.556	5.127
1.057	1.142	1.236	1.119	11.28	13.259	36.385	58.744	4.073	2.207	1.866	1.981	8.575	5.773
1.115	1.203	1.226	1.111	11.413	13.417	30.433	50.099	2.728	1.888	0.901	0.962	8.262	5.577
1.431	1.609	3.562	3.182	25.198	29.936	31.569	51.808	2.84	1.973	0.886	0.945	8.262	5.577
4.729	6.493	3.434	3.073	23.045	27.429	36.662	62.28	2.782	1.948	0.589	0.623	11.71	7.771
4.219	5.689	3.238	2.908	26.739	31.86	35.492	60.375	2.186	1.649	1.137	1.238	10.859	7.254
4.033	5.409	3.347	3	23.929	28.442	36.301	61.701	1.976	1.506	1.128	1.228	11.121	7.411
4.346	5.898	3.487	3.119	6.005	8.275	51.789	84.865	2.13	1.596	0.258	0.269	11.113	7.402
4.439	6.016	5.044	3.87	6.043	8.159	54.508	87.962	2.233	1.681	1.871	2.077	32.674	22.813
4.065	5.448	5.686	4.325	5.972	8.351	16.532	27.45	2.078	1.453	0.98	1.075	35.785	24.908
5.293	6.757	5.638	4.29	5.955	8.391	17.89	29.807	2.039	1.432	0.583	0.636	35.367	24.626
5.453	6.985	5.669	4.312	28.112	33.192	17.521	29.116	2.031	1.427	1.873	2.093	34.245	23.867
5.963	7.687	8.226	5.756	29.152	34.431	19.855	28.007	1.332	0.939	0.215	0.214	35.768	24.895
5.458	6.994	8.105	5.679	30.11	35.579	14.737	21.264	1.511	1.044	0.206	0.203	4.316	3.42
5.286	6.755	7.95	5.578	17.079	20.385	18.052	25.212	1.504	1.041	0.861	0.925	4.79	3.764
4.819	5.999	6.376	4.624	17.965	21.374	4.552	7.469	1.525	1.057	2.173	2.378	5.017	3.93
4.922	6.139	2.427	2.456	18.032	21.45	4.621	7.597	1.015	0.95	2.09	2.284	5.053	3.955
4.903	6.109	2.436	2.461	17.53	20.888	4.549	7.477	0.851	0.825	2.009	2.19	5.273	4.117
4.879	6.078	2.422	2.451	18.021	21.024	6.23	10.382	0.94	0.903	2.013	2.21	2.839	2.124
4.853	6.042	2.395	2.436	19.156	22.37	6.35	10.585	0.956	0.908	1.485	1.612	2.673	2.011
4.964	6.188	6.114	4.296	17.709	20.654	6.373	10.634	1.803	1.242	1.973	2.154	2.681	2.016
9.931	13.373	5.781	4.092	19.931	23.29	3.792	5.951	1.886	1.288	1.153	1.224	2.625	1.977
8.437	11.405	5.625	3.992	18.425	21.508	3.867	6.077	1.965	1.331	1.664	1.784	3.922	3.189
10.31	13.885	2.085	1.72	7.898	14.106	3.598	5.619	1.783	1.233	1.523	1.629	3.808	3.107
11.109	14.97	2.08	1.717	7.906	14.11	14.168	26.385	2.049	1.375	1.309	1.397	3.891	3.166
9.899	13.34	1.273	1.114	7.88	14.006	14.398	26.767	1.686	1.178	1.304	1.391	3.932	3.196
8.719	11.747	1.343	1.169	7.866	13.986	13.963	25.922	0.719	0.71	1.156	1.224	5.571	4.119
2.382	2.85	2.721	2.272	10.904	13.359	12.653	23.382	0.721	0.711	0.97	1.026	5.406	4.014
2.484	2.922	2.708	2.261	10.981	13.449	14.023	26.043	1.759	1.289	2.738	3.042	5.647	4.165
2.341	2.829	2.277	1.969	10.962	13.419	12.629	23.313	1.797	1.309	2.431	2.674	5.984	4.378
2.848	3.009	2.216	1.912	7.796	9.491	14.956	27.852	1.642	1.226	2.383	2.619	5.84	4.287
10.207	12.604	1.362	1.28	7.238	8.808	15.34	28.607	1.714	1.264	0.907	0.95	0.185	0.176
10.931	13.498	1.359	1.28	7.795	9.506	15.06	28.078	1.407	1.23	0.938	0.984	0.184	0.174
11.364	14.026	1.98	1.685	8.696	10.624	12.645	23.428	1.273	1.156	0.604	0.623	0.183	0.174
11.358	14.016	1.984	1.688	7.962	9.701	5.878	8.938	1.396	1.228	0.613	0.633	0.393	0.34
9.405	11.638	1.984	1.691	7.89	8.82	6.135	9.342	1.388	1.273	0.992	1.012	0.391	0.339
7.768	9.611	4.154	3.421	8.034	9.04	5.341	8.094	1.39	1.275	1.293	1.326	1.18	0.933
3.055	3.857	4.047	3.337	7.858	8.818	3.842	5.714	1.416	1.311	1.353	1.39	1.13	0.897
3.064	3.867	3.97	3.278	7.904	8.851	4.444	6.68	1.098	0.864	1.312	1.343	1.126	0.894
3.221	4.081	4.195	3.453	8.523	9.971	5.337	8.088	1.045	0.838	1.024	1.052	1.129	0.896
2.98	3.757	1.158	1.117	8.752	10.223	3.587	3.748	1.07	0.85	1.011	1.039	1.124	0.893
2.807	3.521	1.207	1.153	8.301	9.712	3.832	3.622	1.074	0.852	1.511	1.601	2.364	1.759
5.795	7.972	1.207	1.157	7.991	9.373	3.191	2.922	1.019	0.854	1.586	1.683	2.506	1.858
6.156	8.504	1.051	1.033	16.631	20.31	8.85	13.998	1.031	0.863	1.494	1.587	2.631	1.945
6.19	8.545	1.558	1.383	14.113	17.229	8.814	13.929	1.022	0.86	0.659	0.682	2.548	1.887
7.236	8.583	1.634	1.436	21.163	25.829	7.827	11.981	1.525	1.172	0.309	0.313	2.852	2.114
7.138	8.469	1.573	1.394	7.808	9.051	9.194	14.636	1.564	1.186	0.323	0.328	2.358	1.858
7.394	8.767	1.678	1.466	7.954	9.24	8.409	13.159	1.166	0.84	2.046	2.226	2.396	1.889
7.143	8.474	0.961	0.904	7.938	9.208	9.098	14.513	1.167	0.842	2.115	2.302	2.464	1.94
8.447	11.971	0.967	0.914	7.787	9.026	6.956	10.258	1.346	0.98	3.063	3.392	2.471	1.95
7.61	10.702	0.685	0.678	35.684	42.683	9.412	15.129	1.321	0.974	1.552	1.693	1.354	1.111
6.704	9.329	1.782	1.555	38.979	46.673	9.115	14.506	1.335	0.978	0.524	0.554	1.345	1.103
1.532	1.725	1.813	1.588	22.263	27.222	6.511	11.383	1.711	1.188	4.042	4.558	2.077	1.512
1.541	1.733	1.806	1.574	23.702	29.01	6.5	10.909	1.702	1.184	4.031	4.557	2.105	1.535
3.854	4.469	1.817	1.583	11.077	13.923	6.68	11.541	0.7	0.66	3.782	4.277	3.72	2.556
3.535	4.095	1.82	1.582	10.931	13.738	6.937	11.809	0.697	0.66	1.5	1.636	3.588	2.475
3.658	4.234	4.194	3.46	10.733	13.497	6.852	11.718	7.555	3.88	1.131	1.228	1.032	0.82
4.014	4.444	4.787	3.902	10.307	12.958	6.409	10.8	3.927	2.14	3.653	4.064	1.134	0.898
3.842	4.197	4.895	4.005	5.254	6.141	6.762	11.636	2.783	1.948	2.125	2.361	0.269	0.244
4.041	4.495	1.101	1.102	5.549	6.465	5.296	8.684	2.433	1.508	24.517	26.647	0.273	0.247
1.866	2.211	1.1	1.1	5.457	6.367	6.781	11.768	2.548	1.571	1.376	1.494	2.468	1.84
1.877	2.223	1.096	1.096	0.903	0.915	14.438	24.995	3.129	1.875	15.012	16.784	2.501	1.863
2.627	3.423	0.821	0.721	0.953	0.965	11.148	19.006	3.968	2.308	13.064	14.66	0.26	0.248
2.286	2.922	0.882	0.768	1.286	1.189	9.575	16.287	2.503	1.564	12.029	13.557	0.259	0.247
1.981	2.489	5.759	4.407	1.317	1.255	12.357	21.223	2.211	1.393	13.701	15.329	0.257	0.245
2.497	3.238	5.78	4.368	1.286	1.223	10.873	18.434	2.535	1.563	13.824	15.483	0.297	0.274
2.603	3.374	5.252	4.035	1.263	1.197	9.083	15.507	3.962	2.294	14.42	16.113	0.296	0.272
1.29	1.219	6.591	4.941	1.279	1.213	17.497	30.755	2.656	1.626	13.927	15.63	0.33	0.307
1.303	1.23	10.697	7.67	1.292	1.225	14.87	26.034	3.783	2.102	13.453	14.99	0.33	0.306
1.225	1.164	17.092	11.875	1.406	1.211	6.495	8.132	1.267	1.066	7.956	9.178	0.572	0.458
0.864	0.979	19.826	13.643	1.35	1.135	6.801	8.559	1.27	1.066	11.127	12.669	0.567	0.455
0.842	0.951	26.101	18.055	1.373	1.165	6.223	7.97	1.394	1.18	14.942	16.727	0.692	0.535
1.253	1.38	15.817	11.099	1.3	1.099	6.257	8.052	1.371	1.209	12.748	14.272	0.618	0.484
1.272	1.401	23.752	16.542	1.284	1.075	6.289	12.856	1.244	1.022	12.345	13.923	0.635	0.496
1.288	1.418	22.141	15.324	3.62	4.252	6.385	13.113	1.724	1.263	3.625	4.043	0.561	0.462
0.557	0.56	19.375	13.454	3.436	3.991	6.335	12.989	1.418	1.224	3.185	3.529	0.577	0.473
0.556	0.559	23.757	16.49	3.314	3.824	4.591	7.896	0.917	0.806	3.671	4.108	0.275	0.262
6.015	7.758	24.727	17.134	3.588	4.198	4.061	6.917	1.22	0.981	4.35	4.876	0.278	0.265
12.695	15.439	27.24	19.081	3.418	3.969	4.551	7.94	1.254	1.02	3.973	4.446	0.5	0.443
24.823	31.054	7.522	7.438	0.895	0.853	4.397	7.459	1.762	1.308	1.36	1.473	0.508	0.448
42.671	53.736	7.746	7.697	0.854	0.808	7.594	11.47	0.868	0.793	1.425	1.545	0.192	0.181
22.685	30.268	9.625	9.579	0.852	0.806	7.691	11.622	0.769	0.751	1.257	1.359	0.195	0.183
5.658	7.748	9.047	8.939	0.893	0.853	7.442	11.229	1.264	1.009	0.917	0.982	0.281	0.277
6.936	8.235	9.89	9.798	0.881	0.84	5.914	9.334	0.897	0.817	1.288	1.374	0.281	0.278
1.546	1.738	10.561	10.557	0.979	0.787	5.94	9.378	1.748	1.161	2.288	2.477	0.234	0.228
42.329	54.603	7.96	8.06	1.087	0.868	5.968	9.398	1.887	1.23	2.16	2.333	0.233	0.226
43.069	54.207	6.411	6.16	0.99	0.796	6.468	11.959	1.972	1.273	1.952	2.104	0.156	0.156
4.357	5.897	8.83	8.468	1.099	0.875	6.476	11.978	1.612	1.112	2.237	2.421	0.156	0.156
4.805	5.979	8.918	8.449	1.148	0.908	6.221	11.311	1.499	1.052	2.101	2.269	0.337	0.327
43.054	54.329	8.332	6.1	1.086	0.893	8.357	17.141	1.363	0.942	2.151	2.366	0.338	0.327
2.595	3.364	8.322	6.076	1.064	0.878	8.24	16.81	1.39	0.975	2.069	2.276	0.245	0.243
1.322	1.246	8.515	6.166	1.049	0.868	7.625	16.328	1.356	0.958	2.476	2.725	0.242	0.241
29.975	37.466	8.429	6.154	1.063	0.879	8.158	16.883	1.523	1.074	2.279	2.507	0.263	0.236
2.874	3.03	8.44	6.146	0.992	0.831	8.34	17.726	1.544	1.085	2.188	2.408	0.267	0.238
1.918	2.275	8.14	5.885	2.311	2.297	8.096	16.079	1.467	1.052	1.95	2.14	0.374	0.373
2.685	3.261	5.771	4.149	2.311	2.297	6.127	11.665	1.52	1.077	2.058	2.257	0.375	0.373
12.752	18.303	8.002	5.855	2.279	2.254	9.704	19.266	1.043	0.821	14.372	16.049	0.45	0.459
23.004	30.414	8.574	6.187	2.477	2.516	6.442	12.243	1.028	0.814	15.133	16.843	0.449	0.458
11.964	15.556	8.436	6.101	2.301	2.286	7.389	14.036	1.025	0.81	15.029	16.786	1.294	1.01
21.132	27.873	7.198	5.713	1.433	1.255	5.073	9.484	1.035	0.817	15.676	17.499	5.629	4.182
23.462	31.015	6.991	5.558	1.492	1.327	15.288	24.191	2.797	1.788	3.338	3.778	1.037	0.825
20.479	26.994	6.529	5.195	1.442	1.269	13.561	21.529	2.832	1.802	3.513	3.98	0.734	0.57
20.734	27.365	7.23	5.742	22.234	27.187	15.217	24.134	2.891	1.83	4.413	4.995	0.764	0.592
19.424	25.608	6.627	5.292	7.78	9.018	12.494	20.17	2.693	1.742	4.872	5.532	34.199	23.837
15.367	20.142	6.889	5.487	6.03	8.193	18.198	28.941	2.628	1.709	1.102	1.243	3.763	3.075
10.634	13.759	6.861	5.468	19.992	23.979	11.415	19.34	1.767	1.274	1.145	1.293	3.862	3.146
14.551	19.057	7.054	5.612	6.545	7.762	6.947	14.769	1.797	1.291	1.145	1.294	24.219	16.546
19.492	25.684	7.116	5.655	23.209	27.834	6.799	14.418	1.8	1.293	1.159	1.307	22.638	15.448
19.526	25.762	7.988	6.323	29.364	34.684	6.814	14.429	1.773	1.281	4.407	4.651	19.374	13.328
11.045	13.887	5.04	4.032	4.762	5.848	6.869	14.543	1.288	1	4.148	4.372	14.652	9.716
11.097	13.926	7.425	5.892	4.596	5.623	5.838	12.037	1.118	0.831	4.468	4.717	14.271	9.493
10.988	13.782	2.379	2.156	4.879	5.985	13.277	25.555	1.118	0.827	4.418	4.663	0.599	0.47
11.207	14.087	2.6	2.302	12.213	14.379	13.875	26.732	1.143	0.842	4.273	4.507	0.375	0.325
11.413	14.355	2.346	2.129	20.299	24.256	14.106	27.185	1.12	0.829	4.867	5.145	2.356	1.856
11.158	14.065	2.287	2.076	7.141	8.706	5.912	11.09	1.241	0.97	4.588	4.846	2.435	1.918
11.062	13.858	2.48	2.196	47.657	57.671	6.108	11.431	1.311	1.006	4.606	4.866	2.382	1.877
11.932	15.008	1.801	1.62	28.467	34.645	6.046	11.326	1.277	0.988	8.587	9.923	2.436	1.922
12.131	15.263	2.282	2.031	6.573	7.781	2.326	3.193	1.18	0.937	8.624	9.959	0.264	0.237
18.771	23.879	2.313	2.052	6.478	7.675	2.319	3.138	1.118	0.904	8.739	10.079	27.033	18.436
11.21	14.85	2.922	2.555	6.175	7.328	2.303	3.035	1.344	1.023	8.85	10.198	4.323	3.366
14.795	18.64	3.216	2.778	6.86	8.123	6.649	11.001	1.108	0.9	0.759	0.796	11.095	7.396
17.683	22.309	2.198	2.042	6.675	7.896	5.667	9.166	1.246	0.973	0.768	0.806	11.144	7.419
9.046	11.403	3.198	3.211	6.632	7.846	5.221	8.478	1.046	0.891	0.754	0.791	0.985	0.749
8.067	10.151	3.251	3.244	7.253	8.567	4.837	9.167	0.885	0.745	0.974	1.04	0.234	0.228
8.673	10.966	3.248	3.258	6.705	7.934	4.484	8.714	0.889	0.747	1.877	2.031	3.881	3.16
8.962	11.356	3.261	3.246	5.806	6.918	4.585	8.78	0.901	0.753	2.073	2.25	3.836	3.126
7.791	9.774	10.32	7.156	6.164	8.269	4.375	8.455	0.895	0.75	4.173	4.657	12.63	8.938
7.97	10.006	9.413	6.575	5.751	7.733	7.577	13.72	3.28	1.713	3.605	4	21.165	14.657
8.257	10.399	11.037	7.616	5.945	8.014	8.354	15.517	3.208	1.68	0.822	0.861	13.692	9.661
7.071	8.825	8.948	6.292	5.783	7.763	7.981	14.671	3.255	1.702	0.836	0.876	24.176	16.801
20.113	26.408	8.604	6.074	6.954	9.332	32.987	59.927	3.11	1.636	0.728	0.756	13.305	9.358
20.578	27.048	9.292	6.494	4.484	5.946	35.746	64.72	3.359	1.733	0.646	0.68	23.826	16.387
20.104	26.399	9.204	6.368	5.937	7.991	32.938	59.806	2.23	1.72	0.571	0.585	25.909	17.944
19.902	26.132	10.373	7.426	5.594	7.465	38.83	70.025	2.228	1.719	1.407	1.511	29.84	20.386
20.444	26.868	6.443	4.832	5.95	8.036	54.547	94.37	2.145	1.674	1.284	1.375	18.746	12.965
19.576	25.676	4.469	3.525	3.182	4.077	49.754	86.708	2.151	1.629	1.191	1.272	23.736	16.411
5.858	7.456	7.971	5.82	2.723	3.006	54.328	93.993	1.902	1.513	8.077	8.463	23.244	15.994
5.349	6.402	3.983	3.207	2.689	2.927	53.158	92.137	1.168	0.996	7.986	8.367	24.332	16.911
6.205	7.858	11.526	8.219	2.721	3	53.359	92.256	0.998	0.82	8.095	8.482	22.453	15.437
6.213	7.862	7.223	5.077	2.805	3.067	7.99	11.987	0.966	0.804	7.773	8.143	24.205	16.817
6.707	8.667	8.76	6.063	2.93	3.229	7.059	10.425	0.94	0.792	1.315	1.408	18.355	12.84
9.528	12.092	8.796	6.078	2.894	3.208	6.598	9.667	0.938	0.791	1.281	1.371	26.935	18.321
9.651	12.247	8.136	5.652	2.853	3.149	9.058	13.78	0.997	0.819	1.252	1.34	28.025	19.039
9.655	12.291	7.429	5.196	2.99	3.295	8.408	12.811	0.944	0.796	1.262	1.351	5.083	4.077
9.467	12.014	7.882	5.505	2.826	3.086	8.127	12.194	1.386	1.105	5.859	6.29	4.582	3.822
14.128	18.353	2.707	2.598	3.022	3.366	6.377	9.451	1.548	1.212	6.021	6.476	5.351	4.3
13.89	18.013	2.774	2.753	1.909	1.982	9.993	15.357	1.479	1.169	6.01	6.455	4.964	4.061
13.324	17.249	2.607	2.486	1.772	1.817	5.62	11.642	1.358	1.095	5.209	5.832	4.958	4.032
14.194	18.445	2.698	2.583	1.964	2.043	5.67	11.762	1.477	1.018	5.305	5.935	5.443	4.333
13.712	17.782	2.735	2.574	1.644	1.668	6.325	11.54	1.481	1.023	3.616	4.059	5.226	4.202
14.107	18.319	6.655	5.059	2.254	2.391	6.325	11.54	1.487	1.033	3.609	4.051	3.634	2.752
2.569	3.149	7.886	5.992	1.7	1.775	8.099	14.578	0.972	0.88	2.94	3.12	3.012	2.299
2.621	3.22	6.914	5.218	1.984	2.107	10.227	18.24	0.986	0.888	2.831	3.03	2.876	2.199
2.581	3.166	6.815	5.192	1.781	1.877	4.533	7.198	0.978	0.882	2.751	2.925	3.015	2.304
2.697	3.323	7.444	5.641	1.731	1.813	4.658	7.292	5.642	2.656	0.696	0.725	3.125	2.378
2.196	2.668	8.369	6.382	1.795	1.888	11.983	22.057	5.518	2.613	0.702	0.731	2.602	1.994
2.918	3.503	2.379	1.968	1.539	1.602	12.343	22.423	5.445	2.588	0.791	0.832	2.699	2.067
2.837	3.4	2.535	2.089	2.322	2.501	9.708	17.839	1.041	0.835	0.789	0.83	3.016	2.301
2.883	3.459	2.639	2.169	1.505	1.428	10.023	18.433	1.05	0.844	1.409	1.515	2.884	2.205
2.849	3.414	5.673	4.494	12.04	14.104	5.843	10.683	1.052	0.845	1.425	1.532	2.802	2.144
2.831	3.392	2.881	2.357	12.332	14.446	5.868	10.733	1.644	1.098	1.106	1.184	1.078	0.828
12.837	16.321	4.774	3.862	12.263	14.368	4.447	6.238	1.593	1.07	1.106	1.185	1.031	0.797
14.567	18.702	4.912	3.964	12.072	14.151	4.239	5.859	1.657	1.106	1.355	1.463	0.976	0.756
14.005	17.93	5.028	4.045	12.006	14.077	12.597	21.863	2.241	1.585	1.696	1.822	1.164	0.888
12.668	16.081	5.243	4.216	12.346	14.462	12.682	22.13	2.275	1.612	1.435	1.546	1.103	0.846
10.346	14.331	4.649	3.776	12.412	14.541	7.998	13.841	2.21	1.579	2.378	2.627	1.119	0.856
10.163	13.932	1.651	1.366	6.877	8.344	8.013	13.861	1.564	1.218	2.396	2.648	1.059	0.814
10.228	14.058	2.356	1.953	6.785	8.235	3.666	5.959	1.443	1.137	1.434	1.526	0.249	0.223
8.945	11.663	1.877	1.57	6.902	8.369	4.408	7.257	1.601	1.238	0.845	0.897	0.256	0.228
8.657	11.255	2.553	2.11	7.015	8.498	4.811	7.943	1.594	1.238	0.836	0.887	0.254	0.227
8.837	11.52	2.106	1.747	6.712	8.151	4.651	7.675	1.466	1.047	0.32	0.334	0.243	0.219
5.435	6.902	1.716	1.658	4.352	5.285	9.173	15.366	1.437	1.03	1.109	1.195	0.262	0.231
5.833	7.423	1.78	1.712	4.659	5.653	8.943	14.946	1.432	1.026	0.579	0.61	0.25	0.224
5.558	7.066	2.696	2.373	4.325	5.257	54.502	90.863	1.619	1.097	0.39	0.4	2.414	1.85
5.638	7.167	2.65	2.333	4.556	5.517	54.735	91.233	1.845	1.231	0.407	0.418	0.751	0.604
11.787	16.254	2.589	2.28	6.51	7.817	56.181	93.625	1.871	1.248	0.216	0.22	0.759	0.61
11.729	16.174	2.629	2.314	6.542	7.85	60.812	95.725	1.993	1.324	0.178	0.178	0.763	0.617
10.389	14.275	2.643	2.327	6.62	7.931	62.251	96.737	0.902	0.854	0.472	0.5	3.369	3.305
6.597	8.742	12.973	8.818	6.627	7.959	53.27	86.791	0.768	0.749	1.42	1.517	3.354	3.284
7.72	10.381	14.001	9.496	51.347	61.292	53.559	87.201	0.855	0.828	1.389	1.483	3.251	3.176
11.382	15.674	14.081	9.548	51.21	61.128	53.715	87.414	0.859	0.824	1.35	1.44	3.271	3.203
9.89	13.533	14.08	9.548	50.705	60.49	48.084	79.417	1.651	1.147	0.985	1.04	15.886	10.667
11.762	16.227	3.729	3.034	52.163	62.28	48.299	79.724	1.753	1.207	1.219	1.315	15.559	10.434
8.153	11.013	3.558	2.906	4.53	5.274	61.366	92.194	1.818	1.242	0.984	1.041	15.589	10.463
8.455	12.318	3.677	2.993	4.41	5.14	61.959	92.867	1.677	1.167	0.514	0.545	15.764	10.565
9.743	14.157	4.155	3.342	4.431	5.163	94.559	144.248	1.877	1.273	0.499	0.529	14.308	9.608
10.71	15.535	2.452	2.353	4.37	5.095	100.539	151.312	1.579	1.112	0.504	0.534	16.54	11.086
9.618	13.987	2.521	2.414	4.147	5.013	68.59	112.079	0.756	0.748	2.358	2.56	1.106	0.88
10.592	15.331	2.486	2.385	3.878	4.649	72.046	117.654	0.756	0.747	2.345	2.548	1.105	0.881
10.143	14.723	2.322	2.243	3.513	4.185	64.12	104.895	1.135	0.859	0.943	0.998	1.132	0.897
8.763	12.781	5.089	3.788	4.05	4.868	61.09	97.209	1.144	0.864	0.839	0.887	1.035	0.83
8.655	12.596	5.233	3.881	3.974	4.805	64.102	101.874	1.101	0.841	2.293	2.533	21.228	14.115
10.994	15.094	5.331	3.935	2.847	3.33	117.037	174.827	1.125	0.854	1.756	1.918	20.807	13.81
8.445	11.548	3.85	2.853	2.8	3.272	116.806	175.036	1.35	1.189	1.707	1.863	20.036	13.251
14.125	19.425	3.849	2.852	2.865	3.355	62.46	101.476	1.233	1.128	0.849	0.884	20.47	13.566
9.556	13.107	1.219	1.071	2.903	3.338	44.37	74.19	1.34	1.188	0.85	0.886	16.621	11.371
11.066	15.188	1.196	1.052	2.976	3.483	20.169	34.386	1.353	1.244	0.597	0.621	17.077	11.659
13.778	18.962	1.521	1.317	3.007	3.538	21.35	36.208	1.354	1.245	0.606	0.631	16.638	11.382
2.152	2.655	1.511	1.309	3.053	3.657	13.71	22.453	1.352	1.258	0.847	0.883	16.875	11.527
1.947	2.358	5.623	4.025	2.848	3.255	12.45	20.332	1.093	0.891	1.287	1.362	3.115	2.938
1.522	1.711	5.431	3.871	2.948	3.476	16.926	27.579	1.06	0.878	1.354	1.434	3.025	2.848
1.567	1.76	5.219	4.217	1.505	1.53	16.137	26.255	1.075	0.884	1.309	1.384	3.083	2.903
1.858	2.215	5.261	4.264	1.479	1.496	4.667	7.705	1.077	0.885	0.982	1.027	2.987	2.799
6.367	8.821	1.445	1.227	1.497	1.521	5.422	8.873	1.085	0.92	0.971	1.016	5.008	4.067
5.964	8.202	1.405	1.199	1.502	1.527	17.318	28.376	1.113	0.94	1.138	1.199	5.045	4.082
5.832	8.009	1.73	1.43	1.512	1.554	16.264	26.547	1.105	0.94	1.122	1.181	5.03	4.078
6.074	8.378	2.33	2.105	1.311	1.221	2.213	1.955	1.743	1.338	1.188	1.256	5.117	4.108
6.117	8.423	2.255	2.041	1.33	1.237	1.801	1.552	1.767	1.345	0.877	0.887	5.109	4.106
5.846	8.023	2.203	1.996	1.171	1.114	1.762	1.488	1.101	0.794	0.372	0.377	5.003	4.069
6.816	8.853	2.359	2.129	1.255	1.193	6.946	12.242	1.085	0.784	0.387	0.391	4.686	3.469
6.98	9.079	1.419	1.28	2.032	2.179	6.928	12.196	1.406	1.033	1.347	1.453	4.694	3.473
7.645	9.974	1.466	1.316	20.643	25.854	6.953	12.224	1.397	1.038	1.401	1.512	4.758	3.526
6.967	9.064	1.461	1.316	20.094	25.129	7.134	12.605	1.401	1.036	2.184	2.397	4.611	3.42
6.768	8.793	1.32	1.2	20.17	25.216	6.855	12.06	1.747	1.229	0.892	0.951	5.15	3.78
3.989	4.996	1.566	1.358	20.099	25.119	7.039	12.383	1.745	1.227	1.273	1.354	0.886	0.692
4.342	5.449	1.651	1.419	15.188	19.171	9.59	16.795	0.832	0.757	2.343	2.538	0.882	0.69
4.067	5.097	1.587	1.372	15.298	19.316	9.441	16.679	0.812	0.744	2.275	2.463	3.653	3.824
4.105	5.145	1.699	1.454	13.685	17.384	10.461	18.357	2.963	1.787	2.034	2.195	3.692	3.864
3.98	4.986	0.72	0.683	16.72	20.974	10.749	18.979	1.629	1.091	0.989	1.077	3.716	3.884
4.12	5.164	0.714	0.679	6.783	8.245	10.344	18.283	2.212	1.58	5.332	5.963	3.687	3.855
5.772	7.442	0.372	0.368	4.958	6.06	10.111	17.99	3.237	1.914	1.365	1.478	4.996	4.12
5.811	7.616	2.166	1.842	4.796	5.863	12.907	24.173	3.756	2.168	1.119	1.205	4.967	4.11
5.819	7.484	1.855	1.597	4.246	5.154	13.498	24.859	5.58	3.049	14.874	16.53	4.972	4.108
5.942	7.606	2.137	1.819	3.807	4.608	13.178	24.482	7.721	4.059	0.76	0.797	5.05	4.147
5.81	7.501	2.1	1.791	4.358	5.272	18.346	32.226	4.616	2.638	29.304	32.002	11.694	8.38
5.672	7.385	2.07	1.764	4.008	4.859	18.684	32.615	3.591	2.013	29.036	31.659	11.493	8.258
2.338	2.853	1.649	1.475	6.101	7.936	18.367	32.216	3.628	2.104	29.733	32.392	11.617	8.333
2.383	2.853	2.041	1.791	5.931	7.635	19.561	33.531	8.246	4.094	28.287	30.861	11.745	8.41
2.309	2.846	1.943	1.706	6.339	8.306	18.668	32.66	3.989	2.277	28.997	31.636	10.037	6.895
2.443	2.445	0.917	0.917	6.446	8.477	17.874	31.681	7.356	3.221	28.364	30.963	10.609	7.279
6.157	7.519	0.915	0.915	31.818	37.811	6.25	9.781	1.397	1.166	28.734	31.355	10.276	7.061
6.303	7.683	0.913	0.912	31.079	36.903	8.405	13.397	1.399	1.166	25.896	28.249	10.34	7.102
6.339	7.721	2.682	2.191	32.951	39.071	9.191	14.752	1.629	1.335	16.086	17.467	11.064	7.718
6.314	7.691	2.522	2.073	32.48	38.974	9.594	15.381	1.605	1.359	31.98	34.809	10.079	7.102
6.398	7.795	5.916	4.477	35.032	42.004	3.558	5.55	1.329	1.097	29.154	31.837	10.43	7.316
5.834	7.167	24.359	16.734	35.272	42.29	3.536	5.507	1.976	1.436	27.606	30.095	10.486	7.342
3.106	3.791	13.637	9.644	33.748	40.479	8.121	12.991	1.687	1.395	30.465	33.196	7.406	5.428
3.122	3.812	7.167	5.696	26.436	30.965	25.127	44.764	0.936	0.837	4.206	4.599	7.373	5.392
3.2	3.91	22.32	15.29	26.708	31.344	28.057	49.755	1.283	1.041	4.32	4.733	7.388	5.405
3.032	3.693	14.848	10.382	26.162	30.62	26.11	46.43	1.342	1.096	1.766	1.884	7.543	5.517
2.945	3.584	11.318	8.108	27.386	32.197	6.754	11.336	2.112	1.536	4.504	4.927	7.434	5.434
6.72	9.016	11.637	8.344	26.923	31.576	6.791	11.414	1.086	0.938	4.204	4.592	6.695	5.086
7.011	9.425	18.03	12.437	23.537	34.197	11.15	20.356	0.967	0.885	1.41	1.535	6.957	5.249
7.09	9.529	14.47	10.167	23.576	34.26	11.183	20.369	1.568	1.201	1.449	1.578	6.849	5.164
4.195	5.004	12.673	8.996	23.564	34.075	10.909	19.889	1.146	0.977	1.279	1.391	6.978	5.252
4.085	4.865	14.326	10.054	23.499	33.947	6.779	11.822	2.196	1.392	1.028	1.112	6.697	5.047
4.361	5.215	13.269	9.39	11.091	13.726	6.762	11.786	2.314	1.45	2.496	2.689	3.56	2.609
4.133	4.932	12.471	8.877	11.316	13.991	7.113	12.493	2.414	1.502	3.191	3.454	3.368	2.476
3.156	3.971	16.278	11.399	11.146	13.775	7.362	12.996	2.718	1.709	3.154	3.412	3.39	2.491
3	3.74	6.924	6.209	3.314	4.248	8.449	14.404	2.391	1.533	2.976	3.216	3.313	2.438
2.816	3.481	7.184	6.433	3.218	4.112	8.257	13.953	1.599	1.062	3.249	3.519	3.623	3.416
1.79	2.039	6.096	5.448	3.272	4.189	15.263	25.398	1.488	1.006	3.167	3.429	3.568	3.394
1.795	2.042	5.708	5.123	3.413	4.391	16.069	26.783	1.431	0.974	1.968	2.156	3.612	3.411
1.764	2.042	5.375	4.818	3.323	4.259	15.766	26.269	2.096	1.409	1.893	2.076	3.629	3.418
1.628	1.877	6.049	5.386	17.419	19.655	18.777	33.656	2.148	1.436	2.263	2.479	5.269	4.277
1.691	1.949	11.382	10.296	16.349	17.904	19.338	34.725	1.869	1.298	2.074	2.274	5.153	4.206
4.89	5.697	4.145	3.755	15.911	17.456	18.259	32.754	1.935	1.331	1.992	2.185	5.336	4.32
4.51	5.201	3.084	2.812	16.439	18.174	9.131	14.521	1.354	1.003	1.842	2.011	5.577	4.468
4.993	5.832	1.651	1.544	15.862	18.923	8.598	13.595	1.329	0.992	1.873	2.041	5.48	4.409
3.116	3.694	15.329	11.248	16.444	19.554	9.088	14.333	1.319	0.982	26.329	28.732	0.195	0.183
3.11	3.689	15.67	11.524	16.53	19.659	8.183	12.617	1.34	0.996	25.379	27.697	0.21	0.197
1.286	1.536	18.358	13.594	15.565	18.61	8.677	13.772	6.108	3.476	27.801	30.356	0.216	0.201
1.152	1.36	16.549	12.18	4.661	6.167	0.8	0.86	5.917	3.369	28.717	31.371	0.259	0.241
0.986	1.145	17.02	12.552	4.272	5.611	0.802	0.867	6.206	3.509	4.584	4.979	0.258	0.24
3.345	4.385	20.383	15.097	5.193	6.92	0.791	0.849	5.626	3.245	4.863	5.281	0.847	0.683
2.943	3.822	15.883	11.715	5.269	6.599	0.853	0.934	5.141	3.004	8.876	9.619	0.851	0.69
3.765	3.255	16.122	11.827	5.048	6.297	1.555	1.838	2.914	1.937	9.902	10.731	0.84	0.682
3.832	3.303	19.213	14.259	5.319	6.667	1.6	1.91	3.043	2.009	1.083	1.2	0.842	0.684
3.263	2.845	17.622	13.052	5.249	6.572	1.644	1.966	3.077	2.028	1.122	1.243	0.844	0.686
0.579	0.647	3.77	2.991	7.126	9.977	1.595	1.906	2.222	1.562	1.114	1.234	1.229	0.956
0.571	0.637	3.826	3.034	7.222	10.076	0.871	0.89	1.275	1.014	1.141	1.264	1.281	0.993
0.868	0.914	2.428	1.951	5.647	7.576	0.869	0.883	1.082	0.785	3.86	4.19	1.326	1.026
0.878	0.926	3.551	2.826	6.026	8.124	0.855	0.851	1.134	0.813	3.606	3.914	1.296	1.005
0.888	0.936	3.321	2.657	2.973	3.777	0.84	0.815	1.142	0.816	3.934	4.272	1.474	1.137
0.477	0.49	3.475	2.771	2.955	3.754	2.913	4.181	1.122	0.806	3.881	4.213	2.457	1.856
0.475	0.488	3.358	2.683	3.021	3.841	3.043	4.388	1.399	1.076	3.702	4.02	2.474	1.866
7.716	10.069	3.442	2.745	2.985	3.793	3.093	4.467	1.489	1.13	3.787	4.097	2.556	1.918
17.586	22.048	3.594	2.859	17.598	23.344	9.327	16.126	1.447	1.105	4.046	4.392	2.498	1.879
12.611	16.112	3.387	2.697	18.337	24.457	12.958	22.41	1.341	1.04	4.012	4.355	1.589	1.31
11.107	13.967	2.703	2.162	18.323	24.367	13.877	23.995	1.285	1.006	15.673	16.945	1.584	1.305
8.166	10.273	3.473	2.766	1.486	1.369	14.884	25.732	1.524	1.151	16.323	17.653	1.832	1.408
6.737	9.021	2.632	2.416	1.505	1.376	12.464	21.558	1.226	0.974	17.375	18.805	1.807	1.392
3.881	4.603	2.661	2.427	1.172	1.042	1.26	1.388	1.389	1.074	18.107	19.616	3.672	2.562
1.798	2.045	2.624	2.41	1.191	1.094	1.553	1.784	0.96	0.824	1.013	1.078	3.526	2.469
13.617	17.395	2.597	2.383	1.179	1.08	1.524	1.745	0.95	0.799	1.025	1.091	1.389	1.105
11.244	14.138	2.672	2.601	1.169	1.068	1.531	1.757	0.955	0.801	1.013	1.078	1.57	1.236
6.063	8.348	2.7	2.627	1.175	1.074	1.505	1.72	0.965	0.805	1.125	1.213	0.507	0.469
3.925	4.915	2.693	2.623	1.18	1.077	4.181	5.731	0.96	0.803	2.768	2.992	0.495	0.458
11.126	13.967	2.648	2.572	1.156	0.947	3.755	5.138	2.905	1.538	3.143	3.419	1.133	0.895
2.911	3.777	2.943	2.648	1.165	0.938	3.486	4.697	2.824	1.501	5.414	6.033	1.134	0.895
3.968	3.413	3.037	2.728	1.161	0.942	3.417	4.569	2.881	1.528	4.736	5.251	0.339	0.326
14.621	18.409	2.382	2.218	1.129	0.911	3.319	4.413	2.756	1.469	1.347	1.386	0.338	0.326
2.469	2.468	2.373	2.242	1.134	0.909	5.271	8.703	3.053	1.582	1.361	1.4	0.33	0.318
3.117	3.704	2.404	2.262	2.144	2.235	6.003	10.236	2.222	1.694	1.3	1.33	0.333	0.313
2.619	3.217	2.406	2.271	2.1	2.175	5.815	9.878	2.215	1.692	0.907	0.946	0.33	0.31
11.669	16.088	2.409	2.264	2.042	2.104	5.751	9.755	2.137	1.65	1.175	1.192	0.386	0.37
13.145	16.571	4.746	3.925	2.182	2.275	5.515	9.284	2.103	1.611	1.271	1.36	0.388	0.372
4.108	4.905	4.431	3.697	2.077	2.149	1.835	1.284	1.9	1.499	1.177	1.257	0.763	0.643
10.183	12.65	4.999	4.107	0.899	0.818	1.814	1.26	1.279	1.094	1.11	1.183	0.762	0.642
13.407	16.871	4.303	3.602	0.868	0.781	1.796	1.239	1.232	1.027	2.72	2.872	0.62	0.493
9.251	11.431	4.188	3.519	0.866	0.779	1.775	1.214	1.173	0.989	2.496	2.631	0.562	0.453
10.31	12.885	4.378	3.661	0.903	0.82	1.772	1.211	1.128	0.96	2.572	2.713	0.574	0.461
8.606	10.667	4.046	3.405	0.893	0.809	1.858	2.266	1.124	0.957	2.433	2.564	0.557	0.465
5.826	6.941	19.281	13.215	1.064	0.821	1.805	2.182	1.23	1.027	1.73	1.889	0.557	0.464
3.412	4.023	21.202	14.654	1.159	0.897	1.838	2.23	1.124	0.957	1.662	1.816	0.38	0.363
4.708	5.637	16.546	11.383	1.073	0.829	1.909	2.343	1.781	1.414	1.661	1.815	0.383	0.365
7.718	9.492	17.191	11.836	1.171	0.903	1.783	2.096	2.192	1.714	1.649	1.802	0.91	0.819
10.489	13.153	18.01	12.416	1.202	0.927	1.78	2.091	2.175	1.715	2.786	2.972	0.936	0.844
15.354	19.621	21.34	14.56	1.403	1.123	1.752	2.053	2.144	1.717	3.175	3.373	0.59	0.564
15.287	19.455	3.993	3.184	1.374	1.1	1.765	2.071	2.274	1.456	3.297	3.498	0.607	0.58
15.056	19.141	4.181	3.328	1.355	1.085	1.789	2.104	2.28	1.461	4.286	4.672	0.461	0.457
15.722	20.096	3.906	3.138	1.374	1.101	5.513	9.185	2.239	1.444	3.864	4.224	0.463	0.459
16.114	20.614	3.761	3.03	1.283	1.034	5.722	9.42	0.808	0.771	1.59	1.677	0.35	0.346
15.568	19.91	3.578	2.895	1.485	1.386	5.76	9.47	0.813	0.774	1.588	1.675	0.35	0.346
14.928	18.899	4.222	3.35	1.485	1.386	5.693	9.381	0.809	0.771	1.492	1.61	0.16	0.158
16.849	21.514	2.749	2.476	1.463	1.355	5.719	9.404	6.859	3.23	1.519	1.637	0.159	0.158
17.199	21.956	2.262	2.111	1.576	1.512	7.546	12.483	6.724	3.18	1.49	1.611	0.174	0.169
29.501	37.24	2.692	2.433	1.484	1.385	7.941	13.203	6.736	3.187	0.833	0.881	0.174	0.169
14.399	17.892	2.768	2.491	1.532	1.249	8.397	14.018	1.087	0.863	0.846	0.895	0.175	0.17
21.335	27.09	3.312	2.898	1.535	1.256	8.831	14.797	1.105	0.879	0.73	0.778	0.172	0.168
29.749	37.279	9.459	7.223	1.531	1.25	3.573	3.343	1.104	0.878	0.745	0.795	0.223	0.2
10.421	13.083	9.14	6.952	5.642	7.568	107.049	152.555	2.499	1.451	1.645	1.794	0.225	0.201
10.131	13.309	10.061	7.581	5.243	6.564	123.744	173.71	2.373	1.387	1.659	1.81	0.464	0.463
10.021	13.014	9.153	7.014	6.005	7.756	42.635	68.285	2.495	1.474	1.122	1.208	0.463	0.462
12.533	16.632	9.501	7.194	12.243	14.345	53.38	86.06	2.09	1.533	1.122	1.208	0.383	0.377
9.22	12.012	8.098	6.201	4.497	5.237	36.931	62.671	2.139	1.571	1.214	1.35	0.382	0.376
9.59	12.484	2.464	2.004	3.798	4.573	10.087	17.675	2.107	1.555	1.459	1.615	1.102	0.876
10.496	13.776	2.532	2.056	30.996	36.797	6.658	11.128	1.745	1.361	1.27	1.411	5.443	4.333
7.249	9.357	2.574	2.088	1.51	1.537	6.785	14.387	1.648	1.296	0.532	0.56	1.42	1.128
23.052	28.822	4.775	3.79	1.486	1.505	6.858	14.511	1.809	1.395	0.538	0.567	0.758	0.61
23.241	29.121	2.688	2.175	1.503	1.53	5.909	9.351	1.757	1.369	0.854	0.913	0.763	0.614
22.935	28.676	1.434	1.218	7.008	8.489	35.832	61.266	1.215	0.859	0.83	0.876	7.499	5.486
22.552	28.17	1.485	1.257	4.252	5.166	15.999	26.669	1.203	0.853	0.811	0.856	3.558	3.392
23.067	28.886	1.554	1.31	3.154	4.024	2.161	1.9	1.199	0.851	0.199	0.206	3.602	3.408
22.654	28.255	1.562	1.316	5.675	7.578	33.476	54.767	1.31	0.932	0.996	1.073	22.521	15.537
3.137	3.255	1.344	1.148	6.507	7.806	4.549	7.465	1.504	1.046	0.728	0.777	18.82	13.064
3.973	3.972	8.358	6.553	9.376	11.419	5.912	10.539	1.481	1.035	0.239	0.249	27.625	18.776
3.809	3.863	2.697	2.182	9.401	11.421	84.396	133.455	1.451	1.024	0.548	0.581	17.205	11.734
3.779	3.836	2.88	2.304	9.075	11.018	2.167	3.221	1.213	1.135	0.183	0.184	16.562	11.335
3.615	3.703	2.841	2.302	11.057	13.273	95	147.089	0.974	0.94	0.155	0.156	0.549	0.443
7.997	9.974	3.158	2.534	9.313	11.384	88.698	139.766	1.081	1.033	0.433	0.455	0.244	0.228
7.917	9.881	2.147	1.963	9.228	11.288	4.408	7.267	1.121	1.062	1.45	1.574	2.458	1.857
7.937	9.915	2.111	1.933	11.219	13.512	13.563	25.634	1.898	1.298	1.411	1.532	2.526	1.899
7.98	9.953	5.354	4.517	9.631	11.707	12.682	24.203	1.938	1.322	1.354	1.471	2.474	1.866
10.863	13.922	5.543	4.65	9.362	11.227	1.972	2.874	2.015	1.363	1.035	1.131	2.483	1.87
10.674	13.658	5.868	4.882	40.64	49.06	2.604	3.98	1.826	1.263	0.818	0.886	0.224	0.201
10.507	13.457	5.657	4.73	38.715	46.829	105.854	159.894	2.112	1.414	1.048	1.151	23.423	16.196
10.854	13.911	5.546	4.656	39.997	48.315	4.455	8.663	1.763	1.228	0.524	0.571	4.599	3.88
10.68	13.685	5.46	4.424	38.668	46.772	9.294	14.988	0.739	0.732	0.567	0.611	10.36	7.277
10.818	13.856	5.983	4.821	45.275	54.446	7.903	12.063	0.736	0.728	0.554	0.598	10.558	7.382
5.148	6.9	5.961	4.801	29.764	36.241	11.278	19.126	1.357	0.981	1.668	1.79	1.078	0.828
5.211	6.996	5.98	4.816	39.795	48.08	6.344	13.012	1.354	0.977	1.677	1.801	0.348	0.344
5.153	6.906	31.959	22.833	36.433	44.165	6.378	13.101	1.36	0.992	1.243	1.319	3.611	3.412
5.314	7.151	30.653	21.932	40.178	48.524	7.62	11.509	1.361	0.987	1.035	1.094	3.58	3.398
4.5	5.984	31.578	22.542	19.006	23.184	4.704	8.765	1.435	1.253	1.969	2.16	18.166	12.428
2.393	2.718	28.554	20.305	5.28	6.079	109.67	155.234	1.278	1.163	1.771	1.922	23.316	15.588
2.495	2.877	3.392	2.932	5.113	5.827	9.171	14.732	1.424	1.252	1.738	1.884	20.6	13.975
2.424	2.765	3.712	3.182	4.961	5.669	6.958	14.813	1.381	1.278	1.071	1.095	32.594	21.669
2.574	3.005	3.568	3.069	4.81	5.434	65.764	110.089	1.384	1.28	1.075	1.099	13.502	9.36
2.533	2.938	2.857	2.51	4.281	4.766	66.644	109.79	1.461	1.357	0.516	0.535	23.928	15.894
13.237	16.376	8.888	6.734	6.034	7.025	64.004	105.384	1.259	0.992	0.525	0.545	31.509	20.927
13.895	17.227	9.229	6.989	4.907	5.582	64.445	107.309	1.228	0.978	0.949	1.014	24.74	16.297
13.593	16.845	9.583	7.263	4.069	4.484	64.327	105.271	1.242	0.984	1.612	1.747	17.82	11.952
13.436	16.609	8.559	6.478	4.213	4.665	57.333	98.768	1.248	0.987	1.729	1.877	27.375	18.209
4.336	5.372	8.634	6.53	7.106	8.387	65.885	109.645	1.296	1.065	1.604	1.737	23.187	15.418
4.417	5.462	1.823	1.579	2.55	2.642	50.113	81.232	1.403	1.146	0.84	0.874	32.679	21.729
4.405	5.448	1.848	1.597	2.384	2.445	66.177	108.561	1.356	1.116	0.846	0.881	21.172	14.088
4.455	5.798	3.089	2.584	2.635	2.737	62.483	101.751	1.587	1.235	1.514	1.625	31.787	21.147
4.374	5.683	3.075	2.572	2.214	2.249	38.322	66.141	1.624	1.246	1.571	1.69	24.909	16.745
4.422	5.765	11.893	9.145	2.984	3.152	34.94	59.991	1.007	0.739	1.432	1.533	20.853	13.722
7.567	9.547	11.375	8.79	2.32	2.424	37.857	65.117	0.998	0.732	1.165	1.172	21.466	14.103
7.596	9.567	7.941	6.1	2.662	2.818	39.459	67.384	1.175	0.894	0.815	0.818	10.598	7.549
7.732	9.76	7.801	5.994	2.446	2.578	43.107	73.654	1.148	0.883	0.836	0.84	7.32	5.526
7.49	9.434	1.065	1.009	2.364	2.477	39.645	68.222	1.16	0.888	1.925	2.074	9.874	7.115
7.422	9.839	1.057	1.002	2.442	2.565	25.847	43.817	1.682	1.191	1.996	2.152	8.59	6.318
7.347	9.735	1.123	1.062	2.158	2.257	34.411	58.656	1.658	1.179	2.063	2.248	9.199	6.685
6.919	9.19	1.053	0.915	3.038	3.249	47.376	81.484	0.793	0.742	1.097	1.183	10.769	7.661
6.003	7.867	1.026	0.894	2.437	2.427	37.013	64.412	0.778	0.731	0.696	0.743	9.978	7.171
5.577	7.219	1.006	0.879	29.418	35.784	51.266	88.697	4.982	2.757	3.171	3.43	9.133	6.381
7.173	9.488	1.063	0.923	29.713	36.133	46.177	80.229	2.429	1.437	3.201	3.465	6.188	4.531
6.332	8.3	0.874	0.825	29.631	36.032	49.074	85.322	2.108	1.556	3.077	3.329	5.691	4.171
7.319	9.705	0.913	0.857	29.368	35.706	48.292	83.602	24.41	11.889	0.899	0.972	6.349	4.65
6.713	8.905	0.906	0.853	29.257	35.567	37.289	65.091	23.601	11.636	3.836	4.193	6.403	4.677
5.212	7.357	0.794	0.758	29.664	36.074	57.101	98.624	25.208	12.648	1.413	1.54	4.495	3.3
5.64	7.978	1.026	0.951	29.765	36.192	58.588	101.782	31.139	15.601	1.053	1.137	4.957	3.637
6.032	8.55	1.085	0.998	4.684	5.586	82.075	144.458	16.154	8.518	23.784	25.942	6.17	4.517
5.447	7.694	1.037	0.959	5.378	6.374	81.382	143.751	38.739	17.814	1.014	1.079	5.697	4.174
6.205	8.798	1.119	1.026	5.353	6.346	79.74	140.849	24.206	11.872	20.052	20.914	5.414	3.97
5.888	8.342	0.673	0.646	5.351	6.346	83.586	147.156	37.522	18.234	14.875	15.481	0.873	0.698
4.952	6.97	0.668	0.642	5.542	6.566	78.064	138.223	24.67	12.136	11.983	12.447	0.85	0.682
5.373	7.594	0.654	0.648	5.732	7.976	7.885	13.269	48.813	22.451	16.673	17.367	0.801	0.642
10.747	15.293	1.187	1.067	5.926	8.326	8.085	13.677	1.555	1.235	16.905	17.611	0.921	0.733
9.753	13.944	1.172	1.059	5.739	8.014	6.977	11.347	1.568	1.238	18.545	19.329	0.887	0.707
11.909	16.839	1.183	1.065	5.802	8.04	7.113	11.704	1.882	1.552	17.876	18.649	0.897	0.714
10.212	14.585	1.191	1.072	5.758	6.83	25.471	42.253	1.757	1.584	16.141	16.795	0.859	0.686
10.763	15.307	1.112	1.007	6.125	7.268	21.906	36.548	1.64	1.231	4.668	4.937	0.237	0.211
11.464	16.203	1.163	1.029	7.214	8.568	27.95	46.457	3.143	2.032	8.824	9.117	0.244	0.216
2.697	3.319	1.23	1.08	5.858	6.959	20.722	34.62	1.91	1.652	20.356	21.246	0.239	0.212
2.679	3.32	1.313	1.151	19.808	23.647	26.086	43.425	1.154	0.992	14.317	14.899	0.234	0.209
1.65	1.886	1.154	1.153	19.327	23.101	24.596	41.012	1.752	1.292	12.595	13.083	0.237	0.21
1.716	1.956	1.149	1.148	19.981	23.839	19.08	31.853	1.721	1.275	4.888	5.353	0.233	0.209
2.45	2.991	1.142	1.14	21.823	25.934	40.691	75.136	3.161	2.108	5.31	5.83	3.339	2.486
8.497	12.181	1.118	0.929	12.901	15.796	40.342	74.524	1.13	1.02	2.404	2.599	0.641	0.52
7.782	11.089	1.135	0.943	12.789	15.659	43.526	80.169	0.939	0.912	4.402	4.807	0.646	0.523
7.563	10.763	10.19	7.737	12.891	15.793	40.092	74.08	1.839	1.459	4.497	4.913	0.644	0.521
7.986	11.407	10.079	7.329	12.755	15.618	38.107	67.996	1.577	1.397	2.048	2.226	2.457	2.419
8.029	11.454	20.077	13.753	4.786	5.432	52.763	94.719	14.155	7.327	2.132	2.319	2.449	2.407
7.578	10.78	3.5	2.788	5.43	6.175	45.847	81.785	16.686	8.401	1.715	1.856	2.405	2.354
3.613	4.397	9.02	7.127	5.658	6.424	35.932	64.292	18.283	9.112	2.49	2.703	2.416	2.371
3.717	4.54	7.628	6.098	5.329	6.066	56.056	99.706	6.825	4.219	2.347	2.547	10.986	7.635
3.803	4.651	7.087	5.708	4.569	5.174	55.601	98.881	6.433	4.036	3.557	3.889	10.725	7.487
3.745	4.579	7.922	6.334	8.793	9.822	37.89	67.952	5.305	3.223	3.525	3.852	10.734	7.487
3.684	4.495	8.279	6.572	8.759	9.785	56.142	100.844	7.896	4.218	3.242	3.54	10.931	7.616
3.282	3.977	8.323	6.621	8.802	9.832	40.532	74.17	7.797	4.129	3.521	3.846	9.576	6.786
3.461	4.195	7.698	6.161	9.6	11.893	41.048	75.187	3.354	2.286	3.407	3.72	11.74	8.101
3.297	3.994	7.775	6.211	9.862	12.179	45.66	83.492	3.433	2.321	4.118	4.577	1.608	1.269
3.331	4.036	8.032	6.408	9.888	12.261	42.366	77.452	2.497	1.793	4.069	4.523	1.569	1.241
3.264	3.954	7.954	6.354	10.166	12.623	33.919	62.234	2.512	1.779	4.49	4.996	1.605	1.264
3.304	4	9.777	7.723	9.468	11.595	49.401	90.5	3.574	2.643	4.267	4.746	1.563	1.239
4.362	5.487	4.587	4.489	9.65	12.091	49.963	90.972	3.422	2.566	4.202	4.673	16.694	10.951
3.756	4.693	4.507	4.412	7.114	8.285	48.005	87.749	3.293	2.455	3.719	4.126	16.416	10.779
4.517	5.69	4.098	4.036	6.857	7.982	49.693	90.42	3.488	2.596	3.604	3.996	15.919	10.473
4.845	6.121	4.42	4.349	7.321	8.527	33.132	63.215	18.266	9.684	19.62	20.477	16.189	10.64
4.352	5.473	4.313	4.256	7.347	8.558	36.544	69.131	17.614	9.332	20.219	21.076	14.23	9.417
3.872	4.843	3.683	3.638	7.966	9.246	48.014	87.99	18.936	9.984	20.762	21.67	14.578	9.606
1.909	2.223	2.828	2.789	4.591	4.51	35.406	67.027	16.147	8.64	21.743	22.687	14.231	9.419
1.946	2.228	3.946	3.84	4.487	4.355	8.983	16.913	13.961	7.548	2.374	2.553	14.355	9.49
1.941	2.273	4.02	3.943	5.722	6.124	9.12	17.179	5.475	2.963	2.472	2.657	2.821	2.607
1.843	1.716	3.698	3.63	4.721	4.844	9.07	17.05	5.958	3.187	3.786	4.012	2.851	2.62
8.179	9.902	21.496	16.789	2.823	3.022	9.176	17.564	5.964	3.183	4.1	4.34	2.853	2.625
8.644	10.474	23.087	18.031	14.917	18.945	8.972	16.872	3.902	2.359	1.142	1.289	2.926	2.668
8.756	10.611	25.077	19.551	14.689	18.509	9.297	18.187	1.816	1.306	1.182	1.334	5.07	4.242
8.674	10.509	21.527	16.8	14.926	18.915	9.592	18.737	3.014	1.872	1.178	1.329	5.118	4.27
10.184	12.416	22.845	17.825	14.921	18.899	9.928	19.361	3.692	2.245	1.199	1.353	5.163	4.298
7.146	8.637	17.596	13.708	13.223	20.756	9.726	18.987	3.888	2.316	6.203	6.681	5.173	4.302
4.344	5.59	14.999	11.719	13.244	20.808	9.366	16.63	3.636	2.205	5.782	6.224	5.107	4.261
4.333	5.577	16.882	13.178	13.325	20.738	9.328	16.58	2.458	1.66	6.367	6.859	5.184	4.312
4.503	5.809	26.56	20.693	12.876	20.242	9.401	16.677	2.596	1.711	6.267	6.75	3.63	2.783
4.336	5.574	27.441	21.397	4.949	5.847	9.306	16.552	2.535	1.692	5.874	6.325	3.62	2.777
4.149	5.317	2.515	2.112	3.709	4.408	31.021	50.82	2.402	1.67	5.312	5.691	3.7	2.827
4.247	5.383	2.556	2.144	3.631	4.318	14.996	24.316	2.356	1.689	6.558	7.065	3.654	2.799
4.49	5.718	1.586	1.392	3.91	4.669	2.732	4.158	2.637	1.716	6.392	6.883	3.514	2.691
4.645	5.932	2.461	2.076	3.723	4.43	35.551	58.394	2.189	1.556	4.517	4.774	1.162	0.929
11.496	14.035	2.505	2.12	4.453	5.344	22.803	37.242	2.405	1.614	4.615	4.866	1.226	0.976
11.951	14.688	2.497	2.108	3.788	4.515	30.572	50.072	1.23	1.021	4.867	5.119	2.2	2.298
10.936	13.265	2.475	2.094	3.815	4.984	26.682	43.713	0.993	0.829	5.122	5.382	2.262	2.364
11.894	14.674	2.463	2.082	3.752	4.841	21.535	35.221	0.998	0.832	0.936	1.001	2.287	2.388
1.913	2.294	2.489	2.097	3.875	5.107	30.497	50.544	1.009	0.836	0.933	0.999	2.248	2.346
1.873	2.241	2.291	1.948	3.903	5.167	33.471	54.886	1.003	0.834	0.938	1.004	4.269	3.727
1.782	2.13	1.958	1.678	9.545	12.397	17.567	28.61	1.983	1.127	0.918	0.978	4.226	3.694
4.494	5.785	2.41	2.038	9.731	12.571	36.098	57.54	1.929	1.1	3.195	3.47	4.264	3.728
4.414	5.666	6.766	5.988	10.034	12.858	46.091	75.168	1.97	1.121	3.613	3.916	4.272	3.704
3.188	3.684	7.607	6.643	9.796	13.028	37.633	60.16	1.93	1.097	4.89	5.298	11.12	7.767
2.974	3.427	6.853	6.059	9.644	12.646	43.771	70.87	2.344	1.252	4.505	4.883	10.976	7.694
3.134	3.607	7.038	6.205	9.63	12.621	47.604	77.311	1.452	1.138	1.534	1.599	11.059	7.737
5.706	6.25	2.091	2.014	9.72	12.831	44.314	71.693	1.458	1.145	1.558	1.625	11.15	7.783
5.638	6.065	1.829	1.761	20.537	24.277	44.742	72.699	1.426	1.136	1.407	1.457	13.635	9.069
5.591	6.165	2.041	1.966	20.921	24.773	8.589	13.161	1.424	1.12	1.679	1.812	14.865	9.818
1.841	2.234	2.077	1.996	20.362	24.066	10.53	16.207	1.3	1.056	1.121	1.139	14.588	9.654
1.757	2.123	15.08	12.091	21.336	25.273	13.944	21.653	0.917	0.78	1.205	1.282	14.633	9.681
2.139	2.712	15.899	12.904	20.82	24.612	9.502	14.611	2.994	2.428	1.098	1.165	17.44	11.409
1.83	2.274	11.591	9.214	15.259	28.339	25.222	41.41	2.722	2.218	1.023	1.083	16.874	11.102
1.59	1.945	4.421	3.661	15.281	28.407	18.974	31.407	2.522	2.065	1.868	2.076	16.991	11.158
2.104	2.643	4.517	3.699	15.436	28.521	19.934	32.93	2.5	2.048	2.029	2.249	16.902	11.099
1.947	2.429	4.449	3.679	15.436	28.459	9.462	15.641	2.993	2.43	1.985	2.202	11.437	7.947
6.14	4.845	4.548	3.71	11.385	14.618	9.704	16.021	2.453	2.004	2.033	2.253	12.159	8.344
6.096	4.81	6.5	5.496	11.396	14.68	9.6	15.874	2.121	1.421	1.57	1.742	12.081	8.302
5.386	4.271	6.222	5.282	11.33	14.511	34.723	59.754	2.555	1.658	1.517	1.691	12.069	8.312
0.626	0.728	6.773	5.708	17.769	22.453	41.871	70.956	2.555	1.669	1.514	1.687	12.259	8.407
0.628	0.731	6.563	5.564	17.267	21.869	18.135	30.577	2.552	1.691	1.514	1.688	7.637	5.64
2.204	2.362	6.513	5.532	17.623	22.264	17.652	29.687	2.785	1.695	2.042	2.383	7.57	5.559
2.241	2.403	6.035	5.132	18.16	22.865	18.559	31.14	2.768	1.688	2.031	2.376	7.524	5.512
2.275	2.44	3.973	3.443	17.856	22.547	22.129	33.373	2.617	1.613	2.036	2.379	7.545	5.522
0.814	0.815	7.904	6.273	3.81	4.317	15.206	22.994	0.814	0.783	0.988	1.137	7.479	5.464
0.813	0.813	8.568	6.792	5.465	6.319	19.978	29.974	0.817	0.784	0.997	1.15	4.281	3.177
3.804	4.653	6.617	5.285	5.278	6.096	5.197	7.966	0.815	0.783	1.454	1.553	4.05	3.023
29.305	36.628	7.086	5.651	4.886	5.612	5.492	8.429	18.325	7.389	1.452	1.552	4.095	3.055
17.617	22.276	7.16	5.703	13.75	15.902	5.403	8.287	17.673	7.142	2.013	2.147	3.987	2.981
15.507	19.826	8.596	6.795	13.467	15.574	3.274	5.018	17.438	7.053	2.454	2.632	4.551	3.997
10.166	13.296	2.563	2.196	14.187	16.42	3.39	5.207	3.688	2.353	2.124	2.271	4.355	3.872
4.479	5.701	2.923	2.49	14.546	16.835	3.386	5.21	3.644	2.33	0.991	1.056	4.494	3.959
12.585	15.541	2.783	2.379	25.508	31.224	2.186	3.017	3.674	2.347	0.976	1.04	4.567	4.008
4.392	5.634	2.603	2.231	23.265	28.692	2.257	3.137	22.975	10.389	0.714	0.753	7.08	5.296
13.464	16.676	2.402	2.065	28.951	35.18	1.991	2.692	20.926	9.48	0.721	0.761	6.902	5.189
15.833	20.253	2.788	2.38	9.152	10.238	9.68	16.611	26.252	11.911	2.252	2.456	7.286	5.415
7.947	11.335	5.006	3.998	9.03	10.098	14.096	24.636	1.358	0.999	2.267	2.472	7.691	5.657
3.248	3.937	4.562	3.713	9.359	10.468	13.703	23.82	1.361	1.005	1.089	1.165	7.562	5.578
15.371	19.575	5.886	4.637	9.086	10.164	11.886	20.211	1.335	0.991	1.09	1.165	0.242	0.226
1.936	2.414	5.137	4.091	13.295	15.886	13.485	23.44	1.053	0.828	1.907	2.066	0.248	0.232
6.262	4.936	5.388	4.269	15.129	18.186	15.195	26.201	0.976	0.776	2.178	2.345	0.251	0.234
20.931	26.573	8.416	6.698	30.941	37.308	13.935	24.479	1.049	0.818	1.971	2.133	0.433	0.374
1.845	1.717	8.44	6.742	32.765	39.3	13.021	22.911	1.071	0.841	1.092	1.162	0.43	0.372
1.693	2.04	9.563	7.606	11.729	14.915	11.55	20.166	2.116	1.365	1.088	1.157	1.741	1.321
5.202	6.982	8.02	6.39	11.763	14.964	9.804	16.461	2.009	1.3	1.011	1.073	1.958	1.478
7.32	9.696	8.885	7.084	12.043	15.283	4.66	7.235	1.986	1.286	4.45	4.884	1.836	1.392
9.756	12.142	7.424	5.962	12.081	15.348	4.812	7.488	1.644	1.033	4.425	4.857	1.869	1.415
3.523	4.202	1.139	1.005	10.693	12.368	3.852	5.907	1.873	1.159	1.691	1.818	1.88	1.423
8.003	9.874	1.196	1.05	10.68	12.37	3.11	4.701	1.85	1.149	1.392	1.495	3.249	2.456
9.894	12.318	1.241	1.085	10.726	12.43	3.177	4.807	1.828	1.145	2.723	2.957	3.416	2.579
7.473	9.187	1.918	1.615	3.788	4.006	3.954	6.077	1.918	1.789	1.025	1.095	3.563	2.688
8.054	9.948	1.319	1.146	3.713	3.89	2.173	2.199	1.937	1.874	0.519	0.543	3.466	2.616
7.045	8.647	1.351	1.184	1.318	1.166	3.36	3.22	1.934	1.848	0.231	0.237	3.288	2.481
4.795	5.778	1.418	1.237	1.332	1.218	2.667	2.499	1.948	1.848	0.169	0.172	3.072	2.351
3.097	3.658	1.461	1.269	1.311	1.197	1.997	2.817	2.468	1.478	0.441	0.465	3.025	2.319
4.315	5.181	1.606	1.385	1.295	1.181	1.989	2.803	2.552	1.522	2.873	3.15	3.015	2.313
6.801	8.312	1.298	1.143	1.306	1.19	1.736	2.357	2.669	1.576	2.833	3.106	2.933	2.257
7.683	9.5	3.439	2.543	1.314	1.196	2.063	2.931	2.384	1.446	2.784	3.052	2.782	2.216
7.884	9.483	1.907	1.621	1.375	1.162	1.898	2.642	2.816	1.642	1.029	1.104	2.76	2.199
7.725	9.294	1.591	1.354	1.374	1.128	2.079	2.963	2.285	1.397	1.734	1.859	1.418	1.111
7.708	9.273	2.14	1.809	1.375	1.142	1.543	2.023	0.778	0.763	1.554	1.676	1.423	1.114
7.972	9.596	1.971	1.661	1.337	1.101	2.163	3.111	0.808	0.792	1.386	1.496	2.855	2.098
7.944	9.559	2.813	2.663	1.34	1.092	2.06	2.926	1.032	0.72	1.47	1.586	2.819	2.075
7.865	9.465	2.822	2.676	5.915	7.034	33.364	57.9	1.035	0.72	1.422	1.534	1.237	1.004
7.396	8.892	7.029	6.012	5.958	7.037	32.408	55.936	1.016	0.715	1.322	1.386	1.281	1.034
7.597	9.122	7.833	6.619	5.949	7.003	33.584	58.344	1.03	0.721	1.321	1.386	0.538	0.485
7.487	8.979	9.095	7.577	5.992	7.105	35.017	60.668	2.14	1.878	1.337	1.402	0.525	0.476
2.505	2.617	8.378	7.028	5.917	6.988	34.522	59.869	1.823	1.658	1.113	1.163	0.783	0.64
2.86	3.19	7.532	6.403	0.868	0.811	32.069	55.361	2.115	1.867	4.326	4.836	0.758	0.621
5.833	6.879	6.258	5.263	0.828	0.77	34.16	59.26	1.762	1.619	3.345	3.698	0.249	0.236
2.827	3.051	7.044	5.903	0.827	0.768	24.715	42.414	1.768	1.625	3.266	3.608	0.25	0.239
5.656	6.684	6.976	5.844	0.863	0.811	37.349	58.476	2.093	1.93	1.019	1.046	0.245	0.234
11.389	14.189	7.017	5.879	0.852	0.799	40.568	65.588	1.516	1.115	1.019	1.046	0.394	0.373
11.538	14.318	17.29	13.57	1.138	0.871	35.134	56.908	1.464	1.093	0.481	0.501	0.396	0.375
12.759	16.053	17.429	13.669	1.345	1.007	33.091	53.375	1.486	1.101	0.491	0.513	0.357	0.339
11.03	13.678	16.926	13.291	1.159	0.885	37.116	60.052	1.51	1.121	0.861	0.914	0.357	0.339
11.419	14.175	13.535	10.708	1.37	1.021	34.745	56.384	1.431	1.007	1.398	1.503	0.601	0.494
11.766	14.675	2.041	1.832	1.441	1.069	33.449	53.664	1.439	1.005	1.485	1.598	0.598	0.492
9.545	11.748	2.183	1.944	1.556	1.23	41.908	68.895	1.428	1.005	1.412	1.518	0.662	0.541
6.415	8.028	2.122	1.895	1.534	1.208	42.218	68.504	1.633	1.177	0.845	0.878	0.615	0.506
6.629	8.326	1.808	1.646	1.52	1.195	2.39	2.751	1.74	1.23	0.853	0.887	0.627	0.515
6.407	8.018	34.839	26.991	1.535	1.21	2.465	2.852	0.827	0.59	1.28	1.342	0.73	0.617
6.301	7.872	35.753	27.726	1.449	1.151	2.318	2.703	0.819	0.584	1.35	1.42	0.725	0.611
6.564	8.235	35.444	27.473	2.137	2.115	2.301	2.696	1.291	0.91	1.195	1.249	0.349	0.336
6.163	7.679	21.482	16.678	2.137	2.115	18.526	32.113	1.202	0.865	1.152	1.162	0.354	0.341
3.581	3.272	21.728	16.873	2.103	2.071	19.619	34.002	1.236	0.883	0.847	0.852	0.539	0.455
3.638	3.298	1.541	1.382	2.458	2.492	18.514	32.095	2.804	1.786	0.873	0.878	0.545	0.458
3.48	3.197	1.583	1.416	2.129	2.105	22.793	39.087	2.691	1.716	3.12	3.421	0.367	0.34
3.499	3.214	2.022	1.725	3.12	2.506	21.435	36.862	0.981	0.925	3.217	3.529	0.376	0.348
3.401	3.147	2.046	1.746	3.111	2.523	22.651	38.939	0.951	0.897	4.009	4.453	0.317	0.315
20.516	27.775	3.302	2.543	3.077	2.48	22.053	37.778	25.305	12.588	0.834	0.887	0.318	0.316
20.454	27.79	3.327	2.514	30.913	37.277	12.525	18.595	24.765	11.246	0.971	1.029	0.155	0.152
20.307	27.506	4.688	3.359	9.065	10.141	12.508	18.525	1.335	0.992	3.649	3.993	0.153	0.15
20.392	27.605	4.632	3.321	3.774	4.889	12.547	18.693	32.612	16.275	3.541	3.871	0.118	0.118
10.759	13.065	0.917	0.847	29.602	35.995	14.635	23.667	31.5	15.831	3.336	3.642	0.118	0.118
10.516	12.755	0.91	0.84	12.894	15.79	14.95	24.273	33.449	16.841	2.208	2.425	0.161	0.152
10.185	12.347	0.959	0.885	4.107	4.878	14.827	23.986	40.842	20.219	0.999	1.153	0.161	0.152
10.75	13.054	1.583	1.384	9.774	12.611	20.897	36.962	22.157	11.924	2.049	2.227	0.217	0.212
10.45	12.679	1.543	1.353	7.068	8.232	20.959	37.074	44.674	21.037	1.399	1.503	0.212	0.208
10.713	13.004	1.513	1.33	7.021	8.174	19.418	34.291	32.305	16.173	19.494	20.31	0.2	0.183
2.048	2.414	1.599	1.397	7.555	8.803	28.961	49.865	48.608	23.907	0.936	1.001	0.2	0.182
2.061	2.431	1.548	1.331	5.347	6.34	28.803	49.754	32.873	16.45	7.399	7.674	0.522	0.521
2.076	2.448	1.668	1.417	5.674	7.875	25.537	44.074	56.511	27.216	5.818	5.998	0.52	0.519
2.051	2.418	1.616	1.383	17.021	21.562	26.995	46.375	3.07	2.165	5.198	5.336	0.164	0.161
1.877	2.201	1.333	1.173	37.013	44.84	30.26	51.455	3.125	2.184	6.092	6.293	0.163	0.161
2.315	2.657	2.242	1.826	6.352	7.539	26.56	46.005	3.441	2.584	6.388	6.603	1.592	1.256
2.526	2.967	2.341	1.902	4.62	5.944	31.133	52.302	2.762	2.387	6.637	6.87	10.791	7.675
2.382	2.753	2.273	1.848	4.707	6.035	32.412	53.894	3.413	2.154	7.281	7.549	1.214	0.988
2.666	3.184	2.398	1.945	4.796	6.147	33.492	56.106	8.183	4.364	5.076	5.224	0.643	0.521
2.597	3.075	0.918	0.848	4.913	6.168	25.673	43.327	3.191	2.601	4.622	4.787	0.653	0.528
7.336	8.893	0.911	0.842	4.514	5.835	26.633	45.004	1.423	1.058	5.014	5.117	11.981	8.259
7.606	9.292	0.637	0.631	4.51	5.836	11.666	20.135	3.32	2.01	7.863	8.166	4.266	3.81
7.554	9.203	2.663	2.101	4.704	5.934	10.303	17.663	3.579	2.208	5.237	5.392	4.441	3.924
7.242	8.777	2.781	2.2	4.633	5.943	11.495	19.853	7.835	4.437	5.552	5.703	23.557	15.693
2.456	2.734	2.686	2.12	5.234	6.598	8.721	15.002	1.69	1.473	7.474	8.291	19.897	13.39
2.605	2.898	2.72	2.147	9.76	12.32	13.381	23.386	1.246	1.177	7.979	8.858	21.252	13.97
2.561	2.848	2.615	2.067	7.597	9.599	5.842	10.548	3.252	2.549	4.046	4.464	14.597	9.621
5.274	6.309	2.118	1.774	7.147	9.081	23.639	40.121	2.649	2.388	7.476	8.295	14.191	9.396
5.265	6.33	2.29	1.887	8.38	10.564	22.989	39.061	18.728	9.864	7.194	7.978	0.603	0.497
5.275	6.334	2.474	2.033	11.516	14.613	23.155	39.347	22.192	11.41	1.878	2.056	0.401	0.35
11.31	15.146	0.952	0.942	6.63	8.213	23.471	39.872	24.348	12.415	1.924	2.108	3.077	2.355
12.215	16.449	0.95	0.941	7.74	9.807	19.118	32.799	9.776	6.223	1.519	1.656	3.026	2.32
11.398	15.274	0.946	0.937	10.803	13.493	30.053	49.391	9.051	5.825	2.346	2.567	3.05	2.336
11.904	16.001	1.07	0.974	6.377	8.138	30.649	50.349	5.952	3.647	0.684	0.736	2.966	2.279
6.72	8.722	1.045	0.954	5.397	6.537	30.822	50.624	11.135	5.909	1.71	1.878	0.2	0.183
6.658	8.633	9.094	7.217	17.973	21.604	20.421	35.168	10.979	5.772	1.578	1.728	26.841	17.863
6.66	8.698	7.365	5.925	17.115	20.535	20.372	35.016	5.978	4.226	1.341	1.465	6.275	4.901
4.83	6.071	8.535	6.756	19.294	23.205	19.984	34.35	6.101	4.283	1.503	1.645	17.024	11.182
4.82	6.02	2.459	2.076	19.73	23.71	15.039	25.042	4.849	3.555	1.357	1.481	16.882	11.082
6.486	8.389	9.543	7.673	23.913	28.793	14.547	23.996	4.947	3.582	5.024	5.572	0.873	0.698
5.68	7.247	8.5	6.852	16.702	20.053	13.995	22.831	5.484	4.249	5.108	5.671	0.155	0.152
6.734	8.746	8.066	6.511	20.743	24.954	3.353	5.033	5.34	4.194	4.894	5.416	4.473	3.944
5.61	7.201	9.325	7.491	25.277	30.444	4.029	5.642	5.147	4.016	4.992	5.533	4.403	3.903
6.129	7.825	9.218	7.415	22.189	26.692	3.514	4.797	5.396	4.209	5.064	5.618	26.854	17.876
5.828	7.48	9.562	7.677	13.804	16.533	17.86	31.297	30.438	16.257	4.999	5.547	42.098	27.853
5.636	7.265	8.852	7.124	26.745	32.883	19.24	32.892	28.15	15.045	3.493	3.842	30.003	19.971
5.783	7.416	8.786	7.074	27.032	33.323	18.32	31.652	30.572	16.237	7.418	7.713	57.656	38.31
5.379	6.935	9.267	7.446	25.284	31.027	18.14	30.641	26.699	14.415	7.053	7.326	24.97	16.483
5.786	7.44	9.249	7.432	28.461	35.18	5.17	7.841	22.136	12.135	7.78	8.088	42.739	28.224
5.921	7.562	10.747	8.6	24.798	30.25	5.668	8.696	16.817	8.648	7.937	8.247	56.669	37.602
6.099	7.796	5.301	5.326	27.221	33.449	5.754	8.795	18.257	9.393	3.226	3.378	43.439	28.591
13.948	18.279	5.305	5.353	27.065	33.105	10.116	17.357	18.444	9.475	3.316	3.473	31.684	20.836
12.86	16.837	4.833	4.951	26.245	32.138	10.441	17.92	10.549	5.537	3.986	4.159	49.433	32.754
15.138	19.846	4.929	4.998	26.928	33.053	9.938	17.071	2.829	1.718	4.076	4.25	41.408	27.335
13.422	17.587	4.782	4.886	26.991	33.101	10.599	18.222	4.181	2.508	1.24	1.377	58.614	38.951
13.94	18.265	4.596	4.768	25.476	31.283	18.32	31.534	4.801	2.838	1.275	1.42	37.611	24.78
14.725	19.299	4.201	4.596	27.379	33.367	16.798	28.875	5.246	3.033	1.271	1.414	57.87	38.448
2.309	2.738	4.359	4.3	9.805	11.903	18.419	31.677	4.803	2.825	1.29	1.438	42.64	28.339
2.168	2.58	4.246	4.218	7.907	8.98	17.939	30.858	2.71	1.675	3.234	3.457	36.208	23.74
1.264	1.433	3.707	3.66	7.949	9.03	18.177	31.382	2.864	1.727	2.871	3.07	37.247	24.426
1.342	1.516	29.069	22.689	7.937	9.019	2.923	4.168	2.77	1.69	3.32	3.549	5.814	4.592
1.977	2.327	26.574	20.695	7.892	8.977	2.832	4.038	2.401	1.53	3.252	3.476	5.093	4.094
5.004	6.282	21.844	16.971	7.871	8.957	2.911	4.195	2.071	1.373	3.047	3.258	6.206	4.832
4.738	5.914	27.682	21.608	7.931	9.007	3.019	4.302	2.992	1.781	2.833	3.018	5.648	4.464
4.523	5.629	25.586	19.938	7.935	9.015	3.466	5.246	2.431	1.585	3.426	3.662	5.632	4.457
4.727	5.907	20.827	16.248	11.197	15.146	2.751	3.868	2.883	1.757	3.365	3.596	6.331	4.92
5.017	6.283	14.318	11.02	12.109	15.825	3.567	5.52	1.029	0.78	3.404	3.546	6.02	4.713
4.623	5.759	29.632	23.201	12.381	16.242	3.059	4.344	0.965	0.738	3.436	3.572	4.098	3.204
4.519	5.35	19.851	15.396	12.67	16.668	22.307	38.144	0.97	0.74	3.572	3.704	4.238	3.118
4.594	5.457	20.749	16.075	12.42	16.199	22.03	37.622	0.984	0.744	3.761	3.897	3.67	2.725
4.789	5.714	5.358	4.054	4.327	6.221	27.957	49.203	0.977	0.742	0.806	0.859	4.399	3.233
4.6	5.468	5.736	4.32	4.294	6.182	27.957	49.203	12.295	5.854	0.82	0.875	4.526	3.302
4.529	5.371	2.137	1.765	4.332	6.246	36.78	60.063	11.858	5.661	0.835	0.891	2.326	1.791
2.665	3.115	4.75	3.653	4.3	6.144	36.908	60.436	12.211	5.82	1.232	1.32	2.842	2.15
2.925	3.414	4.781	3.726	4.626	5.524	24.09	40.085	12.155	5.82	1.112	1.219	4.222	3.106
2.743	3.201	4.911	3.788	4.659	5.573	24.815	40.987	14.85	6.985	1.103	1.215	3.68	2.731
2.759	3.221	4.638	3.611	4.757	5.718	29.858	50.419	2.507	1.776	2.543	2.891	3.354	2.506
2.671	3.119	4.654	3.605	4.672	5.559	31.338	52.495	2.521	1.788	2.234	2.532	1.42	1.062
2.799	3.263	4.985	3.817	4.502	5.542	17.977	32.875	2.378	1.718	1.475	1.556	1.438	1.07
5.691	6.934	3.563	2.81	4.466	5.513	13.97	26.522	2.791	1.883	1.488	1.57	1.231	0.943
4.891	5.917	4.997	3.776	4.502	5.537	15.387	27.928	2.112	1.57	1.534	1.623	1.458	1.087
5.875	7.167	4.348	3.373	4.658	5.663	15.276	27.766	1.238	0.995	3.887	4.313	1.418	1.061
6.254	7.651	3.957	3.621	4.05	4.502	6.915	10.445	2.812	1.883	1.171	1.211	1.405	1.055
5.662	6.897	3.972	3.61	3.984	4.429	6.661	10.028	2.621	1.773	1.269	1.35	1.33	1.008
5.089	6.167	4.023	3.679	4.01	4.457	13.276	23.081	2.474	1.689	1.177	1.248	0.251	0.216
2.666	2.944	4.162	3.801	3.963	4.406	13.071	22.912	2.464	1.683	1.108	1.172	0.26	0.222
2.632	2.879	3.143	2.995	5.116	6.064	9.388	16.792	2.805	1.88	0.853	0.966	0.253	0.217
2.732	3.029	2.901	2.751	5.316	6.309	9.353	16.718	2.483	1.69	0.927	1.043	0.249	0.214
1.501	1.383	3.101	2.955	5.463	6.48	7.486	12.623	2.779	1.741	0.901	1.016	0.25	0.214
5.014	5.695	3.15	2.992	5.24	6.222	8.081	13.89	3.061	1.89	0.953	1.069	0.244	0.212
5.127	5.828	3.833	3.345	4.966	5.877	6.873	12.64	3.123	1.938	1.59	1.719	1.6	1.258
5.15	5.858	3.928	3.432	11.68	13.705	7.164	13.299	3.274	2.051	1.532	1.664	0.659	0.542
5.129	5.834	3.403	3.013	11.696	13.729	11.314	20.786	2.4	1.532	1.53	1.66	0.658	0.541
5.464	6.188	8.181	7.555	11.644	13.659	11.299	20.674	2.375	1.521	1.539	1.672	0.628	0.519
4.778	5.408	8.473	7.803	11.394	13.472	41.88	71.976	2.336	1.498	0.815	0.953	2.851	2.715
4.12	5.064	8.319	7.684	10.837	12.822	42.315	72.712	0.827	0.79	0.83	0.976	2.844	2.703
4.134	5.082	8.556	7.871	10.646	12.599	46.67	80.061	0.835	0.796	0.83	0.974	2.776	2.634
4.273	5.263	5.356	4.505	9.824	11.639	78.157	135.223	0.829	0.79	0.714	0.837	2.788	2.653
4.035	4.953	4.784	4.059	11.66	13.781	77.284	133.827	32.781	16.104	0.71	0.834	23.206	14.83
3.88	4.751	5.833	4.876	10.248	12.128	84.854	148.525	31.382	15.432	3.297	3.64	21.973	14.088
4.017	4.881	4.729	4.017	11.006	12.883	83.44	146.313	31.039	15.265	3.289	3.631	22.417	14.352
4.163	5.09	4.534	3.865	10.806	12.643	84.115	147.231	1.091	0.875	1.509	1.615	22.005	14.113
4.25	5.213	4.633	3.941	10.709	12.529	83	148.57	1.131	0.906	3.208	3.397	20.433	13.134
3.791	4.246	3.715	3.212	10.761	12.591	82.941	148.367	1.128	0.904	2.589	2.754	23.238	14.868
3.777	4.228	8.524	6.863	10.977	12.867	83.253	144.226	30.1	13.966	1.097	1.183	2.545	1.814
3.793	4.256	8.293	6.664	2.777	3.163	82.538	143.028	27.986	13.007	1.1	1.186	2.738	1.932
3.75	4.204	6.371	5.119	2.785	3.169	46.406	81.721	32.377	15.041	0.583	0.616	2.512	1.799
3.065	3.695	7.345	5.918	2.317	2.663	46.963	83.302	3.282	1.948	0.587	0.62	2.407	1.724
2.927	3.516	6.747	5.415	2.193	2.511	65.773	118.795	3.302	1.973	4.412	4.731	13.999	9.211
2.774	3.333	9.425	7.579	24.67	29.928	63.855	115.577	3.158	1.906	4.493	4.819	13.955	9.172
2.426	2.793	3.335	2.814	13.5	20.488	68.642	123.669	1.902	1.286	1.442	1.551	13.825	9.071
2.402	2.762	3.703	3.109	12.222	18.309	15.034	25.94	1.627	1.137	1.441	1.55	13.936	9.151
5.706	6.323	3.689	3.103	13.016	19.656	15.332	26.485	1.957	1.302	2.134	2.24	23.361	14.844
5.631	6.237	3.508	2.958	12.922	19.495	29.141	53.369	1.949	1.315	2.294	2.41	24.829	15.736
5.629	6.227	3.304	2.794	3.199	4.871	27.764	50.871	3.717	2.286	2.271	2.382	23.323	14.823
3.611	4.068	3.52	2.96	3.199	4.871	14.581	25.292	3.636	2.24	2.208	2.395	23.965	15.211
3.523	3.906	6.969	6.256	3.326	5.13	11.281	18.994	3.627	2.234	2.242	2.433	2.807	2.557
3.617	4.07	7.323	6.671	3.186	4.824	64.114	115.255	8.375	4.777	0.714	0.774	2.778	2.527
1.109	1.28	6.19	5.501	8.577	10.591	65.396	117.212	8.779	4.801	4.003	4.362	2.804	2.549
1.119	1.292	6.872	6.158	6.3	8.128	5.359	8.441	8.764	4.797	3.987	4.342	2.785	2.523
5.415	6.826	6.86	6.086	6.102	7.87	5.06	7.959	8.759	4.755	0.833	0.873	9.271	6.888
5.004	6.079	17.762	13.584	4.675	5.961	8.25	13.289	1.068	0.948	1.046	1.127	9.498	7.031
4.55	5.453	16.846	12.939	4.382	5.476	7.833	12.603	1.095	1.056	2.158	2.353	9.334	6.935
3.63	4.455	17.655	13.475	4.692	5.984	3.872	6.275	1.125	1.076	0.68	0.716	9.984	7.332
3.652	4.481	17.515	13.417	4.522	5.71	3.877	6.251	1.083	1.008	0.983	1.051	9.944	7.301
2.013	1.57	17.099	13.097	5.261	7.734	8.115	13.398	7.432	3.954	0.177	0.174	9.094	6.79
2.053	1.598	15.65	12.077	5.281	7.742	7.11	11.655	6.481	3.502	0.142	0.142	6.433	4.737
1.824	1.442	4.938	3.511	5.268	7.761	1.758	1.581	6.854	3.687	0.617	0.666	6.428	4.735
0.885	1.031	4.996	3.551	5.269	7.77	1.529	1.333	5.666	3.102	3.518	3.91	6.456	4.744
0.865	1.006	5.042	3.582	3.853	5.234	1.514	1.296	7.617	4.06	3.59	3.993	6.456	4.745
1.987	2.146	5.278	3.76	3.901	5.27	11.424	18.742	5.876	3.198	3.633	4.042	6.066	4.502
2.022	2.184	5.123	3.638	3.933	5.277	11.771	19.352	0.641	0.628	0.563	0.594	2.505	1.782
2.056	2.219	1.127	0.989	3.274	4.513	12.567	20.748	0.647	0.633	1.052	1.121	2.628	1.888
0.627	0.662	1.165	1.018	3.298	4.502	11.539	18.916	2.521	1.56	0.837	0.891	1.891	2.01
0.625	0.66	1.191	1.038	3.301	4.503	11.536	18.947	2.659	1.64	1.239	1.314	1.958	2.078
4.808	5.739	1.262	1.096	3.285	4.506	12.921	21.364	2.114	1.33	1.187	1.253	2	2.118
3.276	3.644	1.094	0.964	4.302	4.9	22.069	37.51	2.349	1.461	1.224	1.294	1.951	2.069
5.093	5.957	3.178	2.448	4.281	4.874	19.161	32.285	2.117	1.627	1.265	1.323	7.319	5.557
7.922	9.531	7.139	5.032	4.289	4.879	22.581	38.426	2.035	1.633	1.262	1.32	7.185	5.472
11.683	14.546	5.143	3.703	4.306	4.913	20.201	34.235	2.116	1.648	1.66	1.743	7.334	5.575
4.133	5.046	7.584	5.338	4.32	4.93	19.294	32.625	2.15	1.867	1.386	1.453	7.14	5.413
3.783	4.225	6.084	4.329	2.933	4.272	15.981	26.809	2.144	1.862	1.596	1.699	14.331	9.643
2.394	2.752	2.142	2.046	2.944	4.289	16.169	26.578	2.212	1.963	5.104	5.668	14.136	9.544
7.486	9.106	2.15	2.056	2.906	4.231	16.098	26.259	1.21	0.866	5.114	5.68	14.238	9.596
8.012	9.645	7.381	6.13	2.886	4.201	16.118	26.398	1.189	0.856	0.893	0.919	14.363	9.66
4.887	6.113	7.308	6.064	3.465	5.11	4.985	8.491	1.199	0.861	0.903	0.93	18.891	12.523
2.619	3.061	7.221	5.98	3.519	5.211	4.86	8.269	1.191	0.857	0.5	0.519	19.569	12.981
7.755	9.331	7.268	6.026	3.368	4.929	4.767	8.107	1.56	1.025	0.51	0.53	18.783	12.482
3.644	4.471	7.326	6.077	15.213	18.205	4.29	7.28	1.608	1.049	0.894	0.947	18.958	12.591
2.108	1.636	6.594	5.457	15.169	18.131	5.183	8.834	1.63	1.065	1.509	1.624	19.649	13.177
5.934	7.014	7.362	6.066	15.391	18.44	5.259	8.98	1.544	1.077	1.613	1.739	17.262	11.687
1.507	1.388	7.325	6.034	15.341	18.431	5.18	8.823	1.671	1.14	1.548	1.667	18.151	12.238
1.161	1.347	7.355	6.058	15.303	18.328	5.002	8.415	2.903	1.809	0.857	0.893	18.347	12.355
2.079	2.453	12.155	9.788	2.271	2.574	5.1	8.582	2.782	1.726	0.856	0.892	15.962	11.048
6.63	8.595	12.088	9.728	2.537	2.911	4.854	8.109	2.774	1.672	1.086	1.135	14.886	10.245
53.454	69.078	11.981	9.647	2.514	2.887	2.286	3.706	2.625	1.626	1.136	1.191	15.029	10.352
36.908	48.83	10.308	8.383	2.394	2.738	2.28	3.696	2.648	1.626	1.029	1.072	15.402	10.628
49.183	63.612	5.975	5.43	4.208	4.757	4.445	7.443	2.045	1.309	0.922	0.933	14.887	10.245
53.367	68.852	6.39	5.79	4.153	4.694	11.566	19.528	2.088	1.333	0.815	0.823	3.79	3.333
48.063	62.212	6.189	5.62	4.15	4.692	12.889	21.78	1.999	1.594	0.835	0.844	4.069	3.535
49.962	64.812	5.245	4.806	4.24	4.797	11.941	20.177	2.163	1.733	6.591	7.36	4.197	3.626
48.022	62.462	12.437	9.872	14.399	17.619	8.211	12.797	33.601	16.851	6.83	7.628	4.226	3.647
33.494	43.506	12.207	9.701	14.735	17.91	8.291	12.946	30.883	14.356	4.055	4.471	4.344	3.73
23.133	30.326	12.122	9.623	14.104	17.416	10.576	17.036	3.163	1.909	1.122	1.199	5.64	4.006
40.234	52.951	6.96	5.469	5.279	6.036	10.59	17.05	31.026	11.272	0.671	0.728	5.317	3.791
48.335	62.766	6.916	5.433	5.574	6.396	10.252	16.494	28.229	10.318	1.927	2.121	5.339	3.808
47.546	61.909	1.416	1.244	5.363	6.132	3.335	4.728	21.522	8.076	1.657	1.819	5.222	3.729
35.339	49.042	1.474	1.29	5.263	6.017	3.337	4.725	15.64	6.153	1.36	1.485	2.456	2.359
36.322	49.874	2.554	2.142	4.465	5.772	3.443	4.922	21.376	7.946	2.817	3.101	2.371	2.291
36.407	49.91	2.569	2.153	4.641	6.043	3.519	5.064	19.026	7.012	0.71	0.835	2.428	2.337
36.158	50.007	8.073	5.754	13.445	16.759	12.432	18.286	29.191	10.65	1.876	2.054	2.463	2.365
35.658	49.423	6.985	5.033	12.965	16.298	12.463	18.263	8.682	3.717	1.113	1.202	6.516	4.867
35.082	48.622	2.097	1.799	10.042	12.044	4.944	8.41	27.927	10.229	6.624	6.878	6.33	4.758
36.464	49.654	2.105	1.807	10.185	12.218	4.827	8.199	3.663	1.842	0.807	0.86	6.661	4.959
34.076	47.199	1.183	1.087	10.167	12.196	4.83	8.212	1.974	1.28	21.943	23.277	7.059	5.194
33.401	46.301	1.166	1.071	10.595	12.717	5.879	10.011	1.977	1.277	21.668	22.887	6.913	5.11
7.649	11.583	1.316	1.202	3.885	4.791	5.963	10.166	2.783	1.868	22.713	23.966	0.187	0.174
11.76	18.337	0.966	0.884	4.079	5.053	5.797	9.88	2.773	2.061	20.621	21.783	0.182	0.169
24.911	34.636	0.945	0.868	4.046	5.011	2.804	3.787	1.671	1.097	21.589	22.837	0.18	0.167
7.07	10.401	0.931	0.856	1.52	1.759	2.761	3.727	3.351	1.925	20.758	21.962	0.388	0.335
24.546	35.591	0.974	0.891	1.583	1.827	2.993	4.111	3.027	2.121	22.584	23.96	0.387	0.334
24.952	33.83	2.097	1.692	3.657	4.029	2.764	3.646	0.841	0.708	17.644	18.532	0.981	0.783
20.754	28.324	2.087	1.693	4.319	5.011	2.729	3.684	1.463	1.008	16.454	17.24	1.008	0.8
25.049	34.062	2.11	1.712	3.971	4.521	0.574	0.59	1.696	1.112	27.062	28.595	0.987	0.786
24.01	32.561	2.097	1.673	3.697	4.132	0.581	0.601	3.965	2.209	22.459	23.862	0.992	0.789
23.474	31.87	1.216	1.079	3.866	4.368	0.573	0.589	1.352	0.967	19.581	20.622	0.995	0.792
24.22	32.887	1.237	1.097	3.981	4.524	0.601	0.628	0.856	0.682	23.901	25.255	3.084	2.301
23.541	31.901	1.218	1.081	4.469	5.257	0.834	0.923	2.952	1.885	11.74	12.976	3.179	2.367
9.554	13.065	1.249	1.108	3.499	4.01	0.819	0.918	1.56	1.062	12.898	14.261	3.261	2.425
9.838	13.452	1.122	0.945	3.883	4.504	0.827	0.927	27.706	10.002	5.374	5.938	3.209	2.388
9.546	13.052	1.131	0.952	3.519	4.023	0.815	0.914	29.688	10.711	11.556	12.765	3.382	2.512
9.409	12.862	0.794	0.724	3.171	3.579	0.828	0.844	30.254	10.924	11.002	12.157	3.236	2.464
9.753	13.334	1.527	1.303	9.199	10.79	0.827	0.837	18.032	6.749	3.233	3.577	3.228	2.455
9.224	12.612	1.651	1.406	9.319	10.925	0.818	0.808	17.39	6.526	3.225	3.568	3.15	2.395
7.333	7.969	1.527	1.304	9.172	10.747	0.805	0.775	21.345	7.755	3.032	3.348	3.208	2.435
9.739	9.847	1.567	1.336	9.589	11.249	2.469	3.551	36.195	12.824	2.729	3.002	3.407	2.758
8.239	8.666	1.358	1.174	9.163	10.742	2.574	3.734	37.26	13.235	4.584	5.116	3.421	2.771
8.268	8.694	1.087	0.986	0.944	0.933	2.616	3.807	6.371	3.096	10.889	12.17	3.707	2.861
7.587	8.17	1.128	1.016	0.871	0.856	10.213	19.918	6.62	3.178	9.511	10.63	3.639	2.812
7.39	9.155	1.213	1.087	0.868	0.853	10.304	20.532	4.116	2.346	8.25	9.217	8.772	5.385
7.278	9.031	0.822	0.799	0.914	0.908	10.307	20.637	4.248	2.416	10.732	12.001	8.442	5.203
7.292	9.073	0.821	0.798	0.898	0.889	10.343	20.815	6.832	3.133	9.592	10.726	1.116	0.871
7.396	9.161	0.818	0.794	1.362	0.982	10.226	20.325	6.144	2.915	6.391	7.133	1.083	0.873
28.818	39.556	1.034	0.907	1.643	1.2	0.878	0.928	6.242	2.949	6.666	7.446	0.595	0.504
29.24	40.053	1.062	0.928	1.391	1.005	1.153	1.287	6.485	3.024	6.195	6.901	0.572	0.484
29.311	40.054	18.274	13.915	1.677	1.221	1.129	1.255	6.272	2.876	6.297	7.022	1.422	1.138
28.597	39.283	8.79	7.076	1.815	1.372	1.13	1.258	7.987	3.488	6.544	7.306	1.436	1.149
28.958	39.667	9.436	7.587	2.507	2.331	1.111	1.231	7.238	3.217	5.931	6.614	0.337	0.307
28.918	39.68	4.684	3.615	2.513	2.321	1.195	1.385	7.028	3.159	4.374	4.852	0.346	0.314
8.777	11.089	5.581	4.92	2.521	2.324	1.257	1.491	9.164	3.919	20.051	21.279	0.332	0.302
8.965	11.335	6.029	5.364	2.515	2.333	1.25	1.483	2.159	1.441	19.065	20.186	0.49	0.432
8.783	11.084	6.274	5.611	2.384	2.264	1.201	1.403	2.156	1.434	21.157	22.474	0.482	0.422
9.288	11.774	7.657	6.768	7.606	9.257	1.195	1.396	2.152	1.44	21.758	23.115	0.457	0.399
7.982	10.038	6.12	5.413	7.606	9.257	1.337	1.657	3.082	1.809	7.453	7.874	0.465	0.404
8.146	10.45	7.383	6.499	7.366	8.968	1.596	2.105	0.964	0.774	7.996	8.452	0.806	0.665
7.751	10	6.9	6.12	8.358	10.14	1.513	1.96	44.14	18.528	9.921	10.443	0.807	0.665
7.997	10.275	6.469	5.74	7.597	9.246	1.484	1.907	41.66	17.04	10.723	11.283	0.942	0.744
7.656	9.921	7.281	6.429	4.58	4.698	1.396	1.753	49.64	20.346	1.38	1.443	0.869	0.691
7.675	9.923	7.42	6.556	4.22	4.377	1.885	1.268	46.94	19.345	1.47	1.538	0.893	0.707
44.793	57.803	8.648	7.525	4.451	4.587	1.888	1.269	8.692	4.577	1.438	1.504	1.231	0.942
44.304	57.215	9.785	14.006	13.45	16.764	1.886	1.263	9.503	4.935	1.529	1.6	1.233	0.935
44.759	57.776	9.981	14.411	5.257	6.011	1.883	1.254	9.054	4.734	5.266	5.49	0.423	0.384
44.359	57.284	9.238	13.769	5.279	7.746	1.881	1.247	7.514	4.034	4.76	4.952	0.429	0.389
8.356	14.484	8.897	12.993	7.931	9.014	1.367	1.455	6.278	3.462	5.354	5.589	0.581	0.488
8.636	14.835	8.648	12.843	4.036	4.486	1.3	1.376	10.087	5.199	5.267	5.495	0.583	0.485
8.573	14.77	9.284	14.163	4.261	5.206	1.301	1.383	7.195	3.918	5.06	5.263	0.526	0.464
7.654	11.9	10.559	16.553	3.91	5.276	1.38	1.478	9.543	4.963	5.464	5.622	0.532	0.468
7.646	11.715	8.354	11.445	11.131	13.032	1	1.101	0.704	0.558	5.493	5.739	0.123	0.12
7.576	11.757	7.197	10.064	10.786	12.619	0.987	1.085	1.007	0.693	5.493	5.728	0.124	0.12
9.773	12.345	6.285	8.585	10.596	12.396	0.976	1.069	1.009	0.693	17.206	18.05	0.255	0.236
9.287	11.653	5.004	4.123	12.643	16.631	0.986	1.083	1.009	0.692	17.688	18.554	0.252	0.233
9.988	12.631	4.762	3.929	4.339	6.238	0.985	1.083	1.008	0.692	18.319	19.225	0.116	0.117
9.298	11.68	4.199	3.482	15.357	18.377	1.561	2.004	3.114	1.748	18.613	19.548	0.116	0.117
14.172	17.882	4.825	3.981	10.73	13.418	1.391	1.693	3.168	1.775	1.006	1.059	0.166	0.152
14.066	17.75	4.61	3.809	4.678	5.606	1.372	1.658	3.105	1.744	1.028	1.083	0.166	0.152
13.635	17.169	3.797	3.165	5.12	6.356	1.406	1.721	2.943	1.668	0.998	1.051	0.161	0.153
6.058	7.428	2.756	2.341	5.292	6.557	1.383	1.68	2.876	1.636	1.501	1.605	0.157	0.151
7.317	9.097	4.805	3.966	5.431	6.74	2.277	3.289	4.339	3.094	8.666	9.735	0.167	0.152
13.483	17.003	3.965	3.295	6.099	7.427	2.373	3.453	4.25	3.068	7.772	8.767	0.169	0.153
10.962	13.784	4.111	3.41	4.904	6.106	2.493	3.653	4.09	2.96	11.499	13.045	0.338	0.336
14.858	18.758	14.3	11.346	4.887	6.091	2.605	3.84	3.663	2.943	11.293	12.798	0.339	0.338
8.977	11.169	14.689	11.657	5.65	6.886	3.075	2.927	3.979	2.875	1.713	1.836	0.134	0.126
15.74	19.639	11.713	9.238	5.171	6.402	38.475	71.218	3.919	2.493	1.739	1.865	0.133	0.125
17.182	21.45	14.034	11.139	6.315	7.764	48.085	87.851	1.98	1.236	1.529	1.632	2.484	1.779
18.32	22.873	14.786	11.753	24.298	38.34	43.032	69.425	1.81	1.147	4.182	4.661	6.332	4.92
16.924	21.141	14.511	11.526	23.094	36.276	41.453	70.2	1.688	1.083	0.841	0.873	1.108	0.866
18.336	22.856	14.443	11.475	22.795	35.942	9.199	15.165	1.672	1.075	1.244	1.329	0.655	0.539
17.719	22.113	14.211	11.286	23.519	36.94	22.719	38.655	1.981	1.236	1.146	1.221	0.661	0.543
15.811	19.77	14.261	11.321	25.514	40.601	8.021	12.441	1.625	1.053	1.07	1.137	15.422	10.644
16.032	19.993	12.641	10.022	23.185	35.541	22.922	38.95	1.558	1.086	1.254	1.34	2.321	2.251
11.939	16.196	16.599	13.162	23.144	36.464	23.443	39.83	1.966	1.308	1.535	1.636	2.402	2.315
9.133	12.357	13.64	10.824	24.538	38.428	14.949	24.314	1.894	1.26	1.441	1.538	42.269	27.934
15.482	21.064	6.215	6.619	22.331	35.244	11.084	18.635	1.74	1.159	1.613	1.716	35.977	23.771
10.312	13.958	6.178	6.541	24.284	35.685	4.803	8.161	2.063	1.374	3.117	3.475	36.889	24.19
12.038	16.337	6.236	6.648	12.67	14.784	1.729	1.547	2.069	1.375	3.115	3.464	25.066	15.879
15.779	21.449	6.273	6.698	12.495	14.536	24.674	40.934	2.052	1.384	3.087	3.436	23.115	14.697
8.07	10.555	9.763	9.682	13.136	15.31	5.211	7.988	1.186	1.154	3.073	3.417	0.843	0.672
7.534	9.877	8.452	8.376	13.387	15.566	9.346	16.604	1.179	1.142	1.038	1.173	0.381	0.332
2.776	3.339	9.456	9.375	14.849	17.263	47.294	86.774	1.183	1.148	1.068	1.204	3.234	2.463
3.082	3.707	9.647	9.559	11.935	13.966	7.008	11.51	1.305	0.866	1.079	1.216	3.178	2.417
6.501	8.43	5.951	6.223	13.615	15.861	46.519	85.023	1.298	0.865	2.822	2.917	3.224	2.454
8.451	10.323	6.011	6.272	15.385	17.874	43.52	79.53	1.3	0.868	2.572	2.664	3.226	2.451
7.864	9.567	5.709	6.216	14.326	16.625	10.247	19.953	0.665	0.568	4.869	5.369	0.168	0.153
7.498	9.112	15.405	19.761	10.547	12.407	26.1	43.429	0.662	0.57	4.856	5.355	48.46	32.103
7.907	9.632	15.864	20.183	16.73	19.347	18.986	31.702	0.663	0.57	2.022	2.074	5.163	4.141
8.322	10.136	15.631	20.048	16.96	19.608	7.048	11.474	21.016	8.785	2.276	2.388	17.945	12.113
7.646	9.291	15.992	20.284	15.862	18.332	8.035	13.574	22.28	9.416	2.547	2.638	18.548	12.478
4.825	5.707	5.627	5.33	17.856	20.652	40.613	74.479	21.724	8.807	0.617	0.641	1.424	1.064
4.951	5.881	5.367	5.122	15.444	17.861	19.246	32.863	3.496	2.984	0.622	0.647	0.257	0.237
5.313	6.337	5.852	5.513	17.435	20.212	2.171	3.123	3.684	3.097	0.821	0.857	2.416	2.327
4.959	5.898	5.403	5.177	16.887	19.58	5.278	8.299	3.691	3.033	0.831	0.868	2.392	2.308
4.831	5.729	5.331	5.124	16.672	19.332	5.647	10.158	3.706	2.451	2.651	2.806	13.62	9.345
3.36	3.915	5.281	5.045	17.212	19.955	18.557	32.168	3.592	2.259	2.666	2.822	9.601	6.917
3.26	3.814	4.539	4.333	17.113	19.84	19.201	33.281	3.487	2.341	1.542	1.649	12.982	8.955
3.343	3.898	5.222	4.628	16.907	19.611	12.515	18.561	3.753	2.503	1.542	1.649	11.024	7.846
3.329	3.884	4.885	4.305	16.818	19.505	9.262	16.483	8.956	4.153	1.689	1.762	10.546	7.479
3.367	3.922	4.296	3.81	7.973	9.036	39.898	73.73	10.162	4.693	1.751	1.83	8.463	6.19
3.326	3.88	4.713	4.189	11.298	12.935	5.197	8.76	10.913	5.025	1.696	1.77	10.265	7.356
16.991	21.793	4.346	3.842	11.37	13.026	23.622	40.083	4.449	2.412	1.443	1.543	6.328	4.799
14.141	17.982	5.598	4.945	11.382	13.042	16.799	26.355	5.027	2.701	1.516	1.625	8.272	6.066
17.744	22.794	2.997	2.831	11.39	13.058	13.378	20.533	4.978	2.679	0.415	0.435	9.785	7.047
19.359	24.936	3.322	3.128	11.392	13.066	15.366	23.966	4.954	2.678	3.95	4.329	8.454	6.183
16.962	21.749	3.363	3.174	11.309	12.953	15.259	23.666	2.245	1.5	3.849	4.217	11.181	7.951
14.632	18.652	3.218	3.043	11.334	12.987	13.748	21.211	1.26	0.938	0.472	0.489	8.001	5.891
2.326	2.877	3.061	2.9	4.945	6.263	35.106	52.021	1.351	0.995	2.044	2.233	11.16	7.94
2.377	2.899	3.129	2.948	5.719	6.916	15.657	24.415	1.72	1.203	1.108	1.19	11.966	8.387
2.288	2.858	11.609	13.85	5.647	6.854	8.713	13.064	8.235	4.169	0.864	0.919	5.841	4.5
2.718	2.915	13.475	16.767	5.605	6.823	12.961	19.836	8.428	4.267	0.64	0.67	5.657	4.38
9.047	10.329	10.475	12.094	5.908	7.111	10.547	15.844	8.969	4.523	0.156	0.158	5.207	3.983
9.376	10.718	11.408	13.532	4.233	5.874	57.397	75.119	7.62	3.886	0.13	0.129	4.961	3.835
9.507	10.874	10.483	12.143	4.101	5.674	57.122	74.549	9.666	4.851	0.649	0.684	5.854	4.427
9.473	10.835	4.394	3.618	4.25	5.912	56.581	73.929	7.187	3.678	4.518	5.027	5.414	4.137
9.106	10.38	4.428	3.651	4.134	5.692	47.204	63.467	0.718	0.693	4.515	5.023	5.254	4.021
8.145	9.26	3.562	2.961	10.462	12.201	47.171	63.037	0.728	0.701	4.387	4.88	5.82	4.396
4.064	4.918	4.665	3.833	10.306	12.033	56.047	73.255	8.17	4.107	1.114	1.197	5.589	4.244
4.082	4.94	4.03	3.335	9.809	11.496	57.626	74.751	8.75	4.366	2.387	2.604	2.387	1.913
4.276	5.187	4.786	3.938	10.796	12.568	48.262	64.969	6.305	3.269	1.383	1.494	4.176	3.121
3.946	4.771	7.828	6.685	4.238	5.175	52.904	69.134	7.483	3.804	0.882	0.935	4.08	3.055
3.73	4.499	7.708	6.571	4.173	5.099	48.119	66.079	2.415	1.694	0.982	1.033	4.648	3.456
5.982	7.415	7.571	6.442	4.253	5.191	50.766	70.676	3.114	2.146	0.947	0.997	2.958	2.257
6.377	7.921	6.83	5.973	4.51	5.492	50.349	69.305	2.495	1.759	1.098	1.155	3.079	2.345
6.469	8.036	7.489	6.363	3.865	4.27	51.268	70.439	4.827	3.329	1.095	1.152	3.599	2.715
3.299	3.645	1.751	1.494	3.751	4.14	50.179	69.694	4.814	3.32	1.345	1.423	4.056	3.036
3.293	3.631	1.817	1.545	3.796	4.19	48.753	66.461	3.213	2.409	1.147	1.212	3.991	2.991
3.276	3.633	1.875	1.59	3.715	4.099	51.658	72.481	5.104	2.779	1.833	1.988	4.019	3.013
3.242	3.58	1.972	1.665	3.104	3.688	53.265	73.683	5.011	2.764	5.794	6.459	17.905	12.236
13.422	16.937	1.669	1.429	3.533	4.217	39.686	65.871	5.048	2.768	5.772	6.435	23.151	15.835
12.645	15.957	18.547	14.604	4.135	4.97	47.966	75.739	5.117	2.804	1.074	1.122	11.419	7.762
11.273	14.202	15.028	11.894	3.244	3.856	46.459	73.198	3.636	2.106	1.089	1.138	14.368	9.821
1.641	1.83	14.054	11.121	3.199	3.81	41.147	68.378	3.339	1.941	0.602	0.628	15.733	10.747
1.67	1.862	14.853	11.771	10.586	13.799	48.68	75.393	3.325	1.939	0.613	0.64	13.309	9.083
0.787	0.922	12.531	9.964	10.511	13.681	1.732	2.425	3.624	2.053	0.958	1.009	12.013	8.182
0.759	0.887	7.295	8.501	10.729	14.062	1.761	2.467	3.701	2.081	1.252	1.333	0.377	0.307
0.755	0.882	7.324	8.533	22.915	28.887	1.331	1.792	6.291	2.919	1.331	1.419	0.39	0.316
7.484	7.33	6.838	6.621	23.782	30.075	1.478	2.027	6.648	3.063	1.225	1.303	0.382	0.311
7.455	7.167	6.781	6.555	24.157	30.483	9.661	16.063	2.401	1.404	0.88	0.918	0.371	0.303
7.581	7.485	6.707	6.468	25.815	32.477	8.234	13.323	2.153	1.293	0.874	0.911	0.378	0.306
1.597	1.865	6.753	6.525	21.658	27.533	9.686	16.109	2.255	1.34	1.733	1.868	0.371	0.304
1.599	1.866	6.776	6.538	24.126	30.248	7.913	12.72	7.673	4.057	1.845	1.994	2.289	1.792
2.154	2.852	6.024	5.59	9.85	11.852	9.175	15.143	7.597	4.02	1.674	1.802	5.432	3.748
2.059	2.714	6.513	6.015	9.76	11.712	8.731	14.311	4.975	2.871	0.812	0.837	4.792	3.322
1.743	2.266	6.47	5.976	9.601	11.539	7.79	12.443	4.668	2.737	0.524	0.532	2.915	2.071
13.726	16.519	6.497	6	9.633	11.583	78.821	105.452	24.041	8.925	0.55	0.559	2.928	2.558
13.504	16.254	5.933	5.102	9.749	11.851	78.325	104.448	22.396	9.154	6.288	7.032	2.937	2.56
3.184	2.647	5.722	4.923	1.438	1.696	80.587	107.27	3.689	3.034	6.583	7.364	2.806	2.456
3.194	2.652	5.823	5.013	1.384	1.631	78.264	104.555	4.686	2.622	5.548	6.178	2.803	2.459
2.962	2.479	5.897	5.204	1.567	1.858	53.021	66.415	4.738	2.661	1.44	1.538	32.063	19.808
1.649	1.9	3.895	4.502	1.3	1.535	62.49	77.897	4.562	2.609	0.399	0.417	33.03	20.34
1.596	1.835	4.152	4.831	14.811	17.175	56.876	70.554	4.072	2.378	10.873	12.146	32.455	20.004
0.404	0.426	4.039	4.688	9.967	16.195	51.937	64.943	5.21	2.979	10.879	12.159	33.504	20.647
0.407	0.43	3.467	3.96	9.124	14.766	61.91	76.347	1.979	1.242	8.961	10.016	32.048	19.609
0.41	0.433	5.576	4.656	9.51	15.42	61.689	76.145	4.693	2.634	3.445	3.829	33.525	20.767
0.559	0.578	5.289	4.432	9.428	15.282	52.958	65.816	2.699	1.661	2.546	2.638	7.465	5.389
0.558	0.577	5.157	4.32	2.511	3.511	65.418	82.21	4.649	2.618	3.237	3.581	7.274	5.248
5.349	6.381	2.173	1.908	2.511	3.514	57.343	71.85	1.112	0.8	2.372	2.603	7.059	5.11
6.927	9.914	2.17	1.904	2.495	3.485	57.526	72.382	1.043	0.835	17.777	18.784	7.448	5.372
21.751	31.239	1.43	1.349	2.504	3.487	60.48	75.856	1.04	0.831	1.007	1.061	22.944	15.201
35.522	49.287	1.414	1.332	5.654	6.741	58.597	73.285	1.335	1.112	26.272	28.2	23.411	15.395
23.762	32.272	1.755	1.601	4.395	5.49	53.369	67.278	1.389	1.238	19.685	21.088	24.11	15.657
5.957	7.373	1.781	1.623	4.345	5.44	60.962	75.974	0.956	0.774	17.291	18.499	23.841	15.584
3.334	3.659	14.694	11.752	4.967	6.255	81.669	112.581	1.261	0.912	20.636	22.117	19.955	12.888
1.679	1.871	14.865	11.875	5.072	6.234	76.192	101.532	1.452	1.25	22.028	23.618	19.445	12.542
44.813	57.838	3.978	3.618	5.227	6.567	66.855	87.135	0.99	0.925	22.899	24.559	20.044	12.946
36.121	50.024	3.868	3.533	4.978	6.191	69.279	95.007	0.967	0.816	26.036	27.91	20.016	12.924
8.12	9.887	1.085	1.022	5.006	8.333	71.287	98.022	0.975	0.793	15.849	16.949	2.891	2.44
3.38	3.936	1.07	1.009	4.923	8.063	86.028	120.319	1.487	1.064	11.986	12.699	2.794	2.362
36.288	49.881	1.194	1.12	5.074	8.531	71.686	98.585	1.224	1.033	17.11	18.276	2.861	2.414
13.476	16.218	1.289	1.136	5.108	8.633	14.739	25.427	1.062	0.932	28.415	30.493	2.764	2.333
3.249	2.692	1.269	1.121	3.169	4.013	17.524	30.217	1.845	1.423	16.959	18.153	11.381	7.711
25.579	35.483	1.253	1.109	3.253	4.107	16.011	27.607	1.783	1.297	18.906	20.235	11.555	7.814
2.735	2.928	1.297	1.142	3.296	4.145	22.864	39.291	5.414	2.918	2.24	2.381	11.124	7.568
1.617	1.886	4.429	3.407	2.627	3.39	14.213	24.517	5.151	2.789	2.489	2.655	12.096	8.127
8.927	11.276	4.375	3.375	2.663	3.426	14.596	24.686	5.072	2.763	0.951	0.984	12.346	8.269
13.967	17.622	4.358	3.366	2.667	3.431	14.595	24.511	5.604	3.157	2.269	2.407	10.68	7.314
9.388	11.719	4.569	3.49	2.645	3.408	15.957	26.915	5.621	3.144	2.113	2.24	2.214	1.788
6.875	8.443	1.821	1.534	3.954	4.738	13.986	23.265	5.99	2.982	1.264	1.336	2.197	1.775
10.566	13.288	1.81	1.527	3.991	4.78	4.621	7.15	4.532	2.365	1.31	1.387	2.359	1.895
9.947	12.461	1.828	1.539	3.942	4.721	4.542	7.019	4.287	2.243	1.149	1.21	2.244	1.812
10.733	13.511	1.804	1.524	4.019	4.818	4.783	7.428	3.371	2.172	1.062	1.114	2.124	1.715
9.487	11.854	3.677	2.822	3.96	4.748	4.422	6.814	3.366	2.171	1.325	1.403	6.556	4.806
9.529	11.909	3.699	2.836	3.258	5.343	33.857	52.03	2.701	1.852	1.572	1.679	6.846	5.009
11.038	13.899	3.716	2.777	3.269	5.366	20.829	33.821	2.641	1.832	1.629	1.74	1.654	1.646
8.012	9.972	3.387	2.673	3.197	5.216	1.718	2.477	5.221	2.946	1.561	1.664	1.674	1.664
8.12	10.063	3.485	2.758	3.171	5.164	37.557	56.955	5.182	2.932	1.616	1.726	1.69	1.673
10.146	12.736	3.383	2.67	2.197	2.885	26.6	41.711	5.361	2.992	1.622	1.731	1.673	1.659
8.665	10.757	3.449	2.721	2.208	2.9	33.724	51.896	5.21	2.941	2.114	2.3	14.448	9.515
12.586	16.448	3.02	2.399	2.193	2.876	33.679	51.488	2.613	1.694	2.074	2.258	14.486	9.548
13.169	17.089	1.509	1.314	28.58	46.386	30.402	46.787	2.905	1.848	2.407	2.621	13.915	9.18
13.061	16.926	1.648	1.407	27.539	44.608	34.087	49.428	2.785	1.781	2.212	2.407	16.657	10.907
12.843	16.751	1.707	1.461	28.792	46.302	35.278	54.163	2.72	1.755	2.162	2.354	23.77	15.336
13.094	17.068	1.393	1.31	29.646	47.365	21.056	33.559	3.082	1.951	1.885	2.042	24.011	15.488
12.798	16.748	1.389	1.305	28.955	46.854	17.855	28.853	1.16	0.876	2.063	2.242	23.912	15.426
13.743	17.739	1.384	1.298	1.389	1.547	27.484	45.763	1.199	0.901	27.25	29.215	23.759	15.329
14.187	18.354	17.906	14.062	1.559	1.759	21.3	34.631	1.193	0.898	25.778	27.651	15.451	9.961
14.527	18.746	19.968	15.668	1.527	1.721	27.239	45.071	1.245	0.903	28.466	30.547	14.563	9.451
28.199	34.746	3.726	3.086	1.473	1.653	25.268	41.747	0.781	0.67	28.859	30.988	13.978	9.088
19.858	25.499	7.24	6.455	2.947	3.482	26.442	43.665	5.324	2.43	3.51	3.786	14.22	9.234
19.705	24.795	5.891	5.203	2.909	3.429	28.841	47.939	5.093	2.432	3.663	3.946	11.937	8.063
27.077	33.34	14.085	11.181	2.941	3.474	9.765	15.443	4.661	2.286	7.207	7.632	10.989	7.478
10.736	14.246	5.163	4.442	2.998	3.555	11.981	19.022	4.857	2.345	8.302	8.786	11.33	7.682
21.968	28.82	5.611	4.861	29.209	47.915	15.858	25.399	1.791	1.053	1.303	1.489	11.386	7.708
18.918	25.028	5.847	5.078	29.692	48.522	10.816	17.158	1.885	1.102	1.383	1.586	8.591	6.08
22.185	29.186	7.039	6.046	28.05	45.955	19.43	32.027	1.834	1.075	1.375	1.577	8.725	6.143
20.949	27.459	5.66	4.882	7.726	9.896	13.811	24.358	1.66	0.982	1.416	1.626	8.699	6.13
20.429	26.81	6.789	5.82	8.06	10.309	14.9	25.78	1.524	0.909	12.459	13.302	8.548	6.044
21.235	27.884	6.379	5.501	7.963	10.22	40.214	57.482	1.95	1.137	10.908	11.642	8.681	6.116
20.28	26.427	5.995	5.177	7.672	9.821	39.342	56.337	1.616	0.962	12.954	13.832	1.339	1.286
28.209	35.051	6.707	5.763	14.963	24.262	39.902	57.017	1.882	1.102	12.621	13.476	1.373	1.313
28.783	35.729	6.832	5.87	15.472	25.075	36.027	49.315	0.712	0.567	11.442	12.213	1.415	1.345
28.172	35.009	7.889	6.689	28.477	47.422	33.475	46.138	1.189	0.79	11.301	12.041	1.405	1.338
27.843	34.624	8.898	8.859	28.38	47.711	21.576	37.303	1.206	0.798	13.609	14.534	1.464	1.384
28.589	35.502	8.729	8.697	35.363	46.652	17.503	30.339	1.196	0.794	13.248	14.145	4.03	2.783
27.508	34.226	7.866	7.863	34.938	46.166	20.281	35.087	1.195	0.793	9.709	10.376	3.814	2.64
14.847	21.892	8.279	8.259	34.563	45.939	7.953	11.974	1.017	0.723	9.937	10.616	3.81	2.639
17.198	24.664	7.881	7.876	33.705	44.99	5.909	8.921	1.002	0.715	10.466	11.175	3.747	2.596
15.953	22.937	7.322	7.338	8.142	12.529	6.907	10.293	1.008	0.719	11.014	11.754	1.51	1.452
15.902	22.918	5.59	5.699	8.709	13.451	2.823	3.982	0.936	0.684	1.084	1.145	1.49	1.439
15.177	21.983	9.172	9.111	8.483	13.1	2.965	4.201	0.94	0.681	1.092	1.154	1.497	1.442
31.483	39.75	8.728	8.68	0.563	0.637	2.966	4.195	1.893	2.421	1.07	1.13	1.51	1.452
31.525	39.836	8.838	8.792	0.562	0.635	3.196	5.137	1.918	2.478	1.567	1.677	7.711	5.411
31.038	39.258	5.987	4.614	6.31	7.274	3.257	5.24	1.895	2.461	1.245	1.322	7.563	5.326
31.369	39.604	6.002	4.618	7.261	8.402	3.316	5.366	1.885	2.493	1.299	1.383	7.67	5.386
11.815	15.465	5.356	4.136	7.207	8.345	1.922	2.625	1.825	2.311	1.732	1.86	7.938	5.538
11.504	15.036	5.643	4.36	7.114	8.239	1.968	2.704	1.649	1.98	1.54	1.649	7.784	5.45
11.346	14.792	5.597	4.321	7.122	8.245	1.794	2.412	1.521	1.065	0.756	0.783	0.411	0.338
11.898	15.587	3.749	2.956	7.082	8.194	14.601	24.523	1.443	1.035	0.765	0.792	0.409	0.336
11.606	15.165	2.623	2.13	3.813	4.365	17.908	30.426	1.384	1.012	0.729	0.75	0.409	0.335
11.735	15.357	4.988	3.881	3.662	4.204	17.298	29.326	1.378	1.009	0.978	1.022	0.725	0.546
2.89	3.556	5.195	4.014	3.737	4.285	14.858	24.927	1.522	1.065	0.656	0.668	0.721	0.544
2.925	3.603	5.7	4.384	3.288	3.786	17.131	29.028	1.369	1.006	1.37	1.447	1.006	0.779
2.921	3.596	6.491	4.683	3.268	3.766	17.944	30.456	2.371	1.625	1.267	1.334	1.055	0.815
2.947	3.635	6.344	4.594	14.195	16.795	18.064	30.714	2.622	1.722	1.192	1.252	1.055	0.816
2.602	3.179	7.735	5.617	14.29	16.804	17.638	29.96	2.519	1.662	2.049	2.124	1.054	0.815
5.676	6.896	7.013	5.038	14.195	16.661	16.641	28.173	2.306	1.546	2.511	2.595	1.059	0.819
4.136	4.966	7.6	5.461	14.483	17.059	13.042	21.705	1.225	1.253	2.36	2.442	3.749	2.719
5.138	6.223	7.212	5.187	14.151	16.657	4.931	7.894	1.217	1.246	2.608	2.693	3.867	2.797
3.477	4.136	7.487	5.376	7.129	8.38	5.098	8.173	1.21	1.263	1.375	1.515	3.964	2.859
3.731	4.458	7.275	5.225	6.574	7.687	3.956	6.228	0.88	0.922	1.293	1.426	3.909	2.824
10.03	12.317	6.915	4.975	6.554	7.662	3.345	5.253	0.888	0.931	1.289	1.419	4.603	3.353
10.52	12.996	7.279	5.204	6.685	7.804	3.256	5.065	0.876	0.918	1.282	1.413	9.932	7.355
10.224	12.601	5.822	4.244	6.582	7.679	4.098	6.476	1.278	0.917	1.796	2.053	9.749	7.229
10.468	12.86	7.172	5.141	4.517	5.161	1.801	1.833	1.254	0.906	1.736	1.986	9.658	7.167
13.826	21.878	6.961	6.611	4.843	5.545	3.065	2.986	1.247	0.902	1.749	2	9.385	6.98
13.538	21.282	6.83	6.46	4.553	5.203	2.264	2.164	6.717	3.436	1.029	1.123	1.691	1.916
13.58	21.37	7.011	6.655	4.88	5.59	3.496	4.969	6.446	3.312	0.986	1.08	1.709	1.934
19.79	29.833	7.099	6.726	4.978	5.707	3.49	4.957	6.498	3.331	1.549	1.618	4.378	2.842
19.655	29.331	7.56	7.473	1.857	2.181	3.431	4.746	1.079	0.759	1.55	1.619	4.243	2.781
19.801	29.799	6.344	6.262	1.894	2.22	3.573	5.107	1.055	0.744	0.985	1.022	4.843	3.719
25.065	32.009	7.262	7.178	1.916	2.243	3.433	4.834	1.2	0.825	1.416	1.474	4.942	3.783
25.761	32.835	7.434	7.342	1.89	2.216	3.468	4.974	1.543	1.891	1.093	1.132	1.493	1.376
25.554	32.664	5.418	4.962	1.82	2.14	3.325	4.499	1.573	1.923	1.053	1.108	1.347	1.165
25.261	32.196	5.695	5.23	5.517	6.246	3.482	5.036	1.561	1.903	1.065	1.122	0.414	0.343
19.289	24.678	5.052	4.68	5.517	6.246	3.528	5.044	1.408	1.646	0.706	0.736	0.405	0.337
19.138	24.491	7.97	7.588	5.504	6.23	6.692	10.35	1.279	1.454	0.707	0.737	1.324	0.982
17.75	22.723	8.052	7.661	5.835	6.61	6.726	10.284	1.325	1.528	3.307	3.489	1.338	0.993
8.084	10.163	8.055	7.671	5.517	6.246	6.575	10.075	1.437	1.69	3.332	3.515	1.564	1.205
9.53	12.124	8.065	7.672	1.303	1.555	6.742	10.308	9.745	3.506	1.725	1.85	1.538	1.187
18.307	23.423	5.737	5.185	1.239	1.476	6.68	10.218	9.653	3.475	1.726	1.851	1.527	1.18
14.716	18.824	5.381	4.9	1.288	1.536	6.736	10.327	9.549	3.447	1.291	1.354	0.851	0.71
19.569	25.074	6.042	5.428	28.48	47.424	6.665	10.22	1.598	0.978	1.573	1.639	0.877	0.726
12.42	15.736	5.385	4.91	7.656	9.798	6.661	10.229	1.693	1.032	1.378	1.442	0.506	0.408
6.507	9.514	5.279	4.827	4.95	8.147	9.174	16.216	1.669	1.019	0.745	0.762	0.518	0.417
6.708	9.808	5.276	4.815	11.383	13.044	13.483	24.649	1.601	0.988	0.739	0.755	1.05	0.82
6.819	9.962	4.383	4.056	3.841	4.242	10.32	18.537	2.765	1.676	0.648	0.643	1.041	0.813
6.774	9.924	4.752	4.11	5.891	7.102	9.227	16.456	1.762	1.103	0.941	0.971	6.465	4.396
6.483	9.428	4.365	3.74	3.269	4.125	11.516	20.854	1.751	1.1	0.934	0.964	5.87	4.026
6.707	9.791	3.558	3.066	9.946	11.977	9.901	17.697	2.228	1.369	0.363	0.355	5.93	4.058
6.754	9.923	4.142	3.588	9.713	11.662	9.194	16.392	2.609	1.44	0.961	1.003	3.531	2.541
6.488	9.474	3.638	3.122	9.479	11.395	15.513	28.426	2.848	1.546	0.569	0.593	3.645	2.631
9.565	13.258	5.165	4.457	5.602	6.819	14.167	25.929	3.034	1.63	0.465	0.475	0.361	0.318
7.847	10.842	2.359	2.184	4.277	5.943	2.166	2.509	2.614	1.44	0.299	0.306	0.369	0.324
11.406	15.824	2.751	2.53	27.59	44.208	2.245	2.613	3.226	1.717	0.148	0.147	2.093	1.558
8.739	12.109	2.757	2.543	24.549	38.484	2.1	2.462	2.384	1.338	0.129	0.131	1.972	1.472
9.548	13.228	2.584	2.391	10.095	11.803	2.087	2.455	0.859	0.756	0.528	0.552	0.505	0.416
11.003	15.278	2.398	2.227	19.862	24.354	5.399	8.193	0.883	0.775	1.01	1.075	0.513	0.422
1.798	2.192	2.532	2.334	22.074	26.996	5.462	8.326	3.988	1.878	0.978	1.041	0.353	0.341
1.654	2.003	7.592	7.103	24.551	29.969	5.41	8.214	3.897	1.848	0.951	1.011	0.354	0.342
1.156	1.326	7.353	6.941	29.443	35.723	2.869	4.031	4.485	2.032	1.197	1.247	0.974	0.787
1.235	1.421	6.662	6.145	17.208	21.174	2.957	4.141	4.054	1.902	1.014	1.053	1	0.808
1.553	1.863	7.499	7.003	17.158	21.115	2.84	3.99	1.809	1.236	1.142	1.196	0.113	0.11
9.327	13.462	7.113	6.611	23.507	28.638	2.917	4.091	1.509	1.039	1.023	1.047	0.114	0.111
8.293	11.947	4.952	3.962	20.028	24.545	5.818	8.363	1.767	1.214	1.412	1.461	0.215	0.194
7.904	11.367	4.838	3.888	35.746	43.309	5.907	8.499	1.398	0.924	1.31	1.353	0.213	0.193
8.543	12.306	3.894	3.146	27.074	33.491	5.683	8.156	1.403	0.927	2.521	2.711	0.151	0.145
8.755	12.639	5.262	4.205	29.642	36.546	6.255	9.426	1.508	1.106	2.526	2.716	0.147	0.142
7.975	11.48	4.405	3.549	29.984	36.95	6.262	9.437	1.848	1.135	0.68	0.715	0.136	0.125
8.445	10.274	5.24	4.209	28.712	35.438	6.27	9.448	1.742	1.078	0.667	0.703	0.136	0.125
8.542	10.426	5.47	4.749	25.467	31.609	4.306	5.926	1.794	1.106	2.372	2.595	0.185	0.184
9.592	11.755	5.431	4.744	35.662	43.794	4.317	5.943	1.791	1.103	1.739	1.874	0.185	0.185
8.464	10.337	5.385	4.732	29.356	36.204	4.052	5.517	1.346	0.891	1.697	1.827	0.201	0.189
8.222	10.018	4.671	4.271	25.18	31.195	6.636	10.022	1.343	0.892	0.676	0.689	0.2	0.188
4.302	5.078	5.349	4.731	30.777	37.89	6.543	9.836	1.295	0.87	0.682	0.694	7.198	5.204
4.49	5.323	1.884	1.621	51.895	63.154	6.08	9.454	1.584	0.925	1.06	1.095	5.815	4.393
4.439	5.244	1.967	1.685	24.409	29.002	6.549	10.073	1.632	0.949	1.077	1.113	1.474	1.341
4.403	5.205	2.035	1.738	20.495	24.292	6.724	10.19	1.284	0.801	1.118	1.167	4.986	3.451
4.35	5.134	2.169	1.843	24.591	29.246	6.718	10.247	1.235	0.777	1.436	1.514	4.23	2.949
4.55	5.378	1.795	1.551	21.877	25.998	3.511	5.257	2.323	1.279	1.5	1.584	8.578	6.062
20.675	26.42	2.446	2.183	24.936	29.744	4.553	7.185	2.151	1.192	1.454	1.533	1.458	1.413
17.178	22.087	3.103	2.754	23.618	28.031	3.685	5.576	2.243	1.237	0.844	0.882	1.484	1.432
21.535	27.506	2.348	2.184	24.516	29.182	5.426	8.419	1.819	1.091	0.836	0.873	8.956	6.506
23.335	29.788	3.404	2.998	25.074	29.933	3.284	4.761	1.789	1.077	1.486	1.576	9.583	6.895
20.58	26.316	2.639	2.439	22.466	26.751	4.026	6.141	2.237	1.24	1.53	1.623	5.734	4.43
17.893	22.927	8.711	8.62	22.597	26.755	3.899	5.938	2.291	1.269	1.474	1.563	19.653	12.677
2.287	2.751	8.815	8.728	18.94	22.579	4.003	6.12	4.575	2.6	0.629	0.638	20.057	12.955
2.27	2.692	4.061	3.536	18.316	21.832	3.765	5.782	1.186	0.816	0.586	0.591	5.798	3.985
2.261	2.743	4.003	3.49	18.67	22.237	4.152	6.42	1.561	1.903	0.595	0.602	0.672	0.512
2.011	2.061	3.92	3.424	18.172	21.675	3.739	5.891	4.273	2.433	1.598	1.703	9.951	7.368
16.178	19.44	3.97	3.464	20.04	23.88	5.83	8.891	4.125	2.376	1.657	1.767	9.718	7.208
17.107	20.552	4.01	3.494	20.047	23.949	5.774	8.807	3.729	2.221	2.28	2.477	9.841	7.292
17.652	21.203	6.313	5.616	21.455	25.634	5.785	8.817	3.351	2.067	1.459	1.559	9.522	7.074
17.639	21.188	6.992	6.182	20.866	24.931	5.811	8.853	3.776	2.253	0.606	0.6	0.136	0.125
15.129	18.15	6.92	6.12	20.298	24.249	5.419	8.244	1.783	1.177	1.574	1.683	9.744	7.019
13.061	15.711	6.961	6.155	20.632	24.65	7.296	11.247	4.173	2.394	1.576	1.684	5.284	4.069
3.968	5.299	6.077	5.051	19.528	23.326	7.596	11.796	2.178	1.459	1.594	1.7	11.262	7.646
3.979	5.315	5.891	4.893	22.515	26.9	7.706	11.997	4.097	2.364	0.975	1.043	11.456	7.747
4.145	5.551	5.937	4.94	9.747	11.326	5.588	8.431	0.828	0.712	0.981	1.075	18.206	12.443
3.885	5.178	5.64	4.808	33	39.593	5.62	8.464	1.586	1.256	1.267	1.339	0.965	0.78
3.702	4.916	4.338	4.308	33.794	40.552	5.584	8.399	1.58	1.25	0.986	1.032	1.487	1.434
7.596	9.69	4.52	4.48	33.751	40.498	2.244	2.963	1.925	1.559	24.27	26.017	1.497	1.444
8.165	10.423	4.437	4.405	33.55	40.246	2.208	2.908	2.14	1.787	1.085	1.146	28.441	18.179
8.301	10.59	4.018	4.016	33.542	40.232	2.112	2.735	1.427	1.14	14.076	15.423	22.744	14.762
8.814	10.334	6.738	5.234	33.542	40.247	4.137	6.584	1.661	1.242	10.657	11.717	28.938	18.503
8.716	10.22	6.308	4.898	33.795	40.552	3.547	5.477	2.112	1.741	9.485	10.466	27.202	17.574
8.803	10.325	6.247	4.856	21.483	27.065	3.494	5.436	1.158	1.025	11.072	12.149	26.16	16.85
8.497	9.973	1.811	1.575	22.66	27.996	4.898	6.951	1.297	1.08	11.858	13.016	19.384	12.653
6.234	8.334	1.808	1.573	22.882	28.313	5.125	7.51	1.409	1.132	12.235	13.409	24.712	16.004
5.723	7.622	1.25	1.162	23.118	28.637	5.004	7.229	1.801	1.336	14.167	15.572	14.161	9.321
5.172	6.871	1.237	1.148	22.833	28.161	5.039	7.55	1.768	1.363	8.324	9.123	19.377	12.637
2.945	3.324	1.569	1.394	7.815	10.492	6.08	10.079	1.537	1.206	9.047	10.462	22.97	14.922
2.901	3.271	1.576	1.4	7.456	9.967	6.395	10.737	2.594	1.882	9.629	10.703	19.42	12.673
2.525	2.949	6.003	4.26	7.607	10.26	6.203	10.316	2.013	1.404	15.319	16.798	27.18	17.574
2.324	2.707	5.752	4.099	8.157	10.815	13.263	23.575	4.341	2.424	9.136	10.039	18.274	11.948
2.448	2.849	2.005	2.042	35.287	42.402	13.575	24.133	4.413	2.448	10.356	11.425	26.638	17.247
6.329	5.693	1.986	2.029	35.62	42.809	13.064	23.213	4.395	2.451	2.749	3.014	28.05	18.047
6.366	5.672	1.978	1.761	36.609	44.017	13.682	24.317	3.823	2.282	2.706	2.963	11.971	7.978
6.327	5.71	1.917	1.711	34.947	41.983	30.311	53.969	3.836	2.284	3.609	3.975	11.365	7.596
0.947	1.101	2.403	2.101	4.697	5.689	27.807	49.428	4.985	2.574	2.455	2.687	10.939	7.345
0.937	1.09	2.478	2.07	4.634	5.616	30.958	54.807	4.902	2.464	2.729	2.994	7.944	5.421
1.767	2.135	2.508	2.094	4.702	5.689	29.908	53.232	4.81	2.404	1.221	1.332	11.519	7.697
1.47	1.74	2.523	2.106	4.968	5.996	28.338	50.199	3.536	2.269	1.207	1.316	9.661	6.513
1.246	1.45	2.468	2.062	10.824	12.726	5.776	7.656	3.538	2.271	1.215	1.326	10.038	6.762
3.514	4.824	3.557	2.874	10.434	12.252	6.063	7.981	3.353	2.203	1.034	1.12	12.303	8.204
3.602	4.949	3.596	2.903	10.578	12.426	6.204	8.142	3.41	2.246	2.866	3.069	11.234	7.522
1.106	1.078	3.869	3.108	10.309	12.1	5.488	7.338	3.739	2.207	4.144	4.454	5.852	3.91
1.13	1.098	3.214	2.616	3.765	4.494	5.33	7.143	3.723	2.201	4.126	4.44	3.858	2.747
0.97	0.953	3.732	2.979	4.118	4.923	5.515	7.313	3.797	2.219	3.815	4.102	3.361	2.412
0.714	0.759	3.862	3.081	4.711	5.642	5.668	7.483	3.736	2.205	4.178	4.494	4.01	2.848
0.704	0.747	3.714	2.967	3.833	4.577	5.109	6.894	1.777	1.274	4.064	4.373	3.999	2.851
1.506	1.65	3.936	3.138	3.921	4.681	5.691	8.56	2.074	1.428	2.171	2.355	2.159	1.604
1.53	1.676	2.861	2.303	11.242	13.503	5.664	8.54	1.948	1.362	1.982	2.144	2.624	1.917
1.549	1.698	2.809	2.267	11.185	13.434	6.12	9.321	1.917	1.347	2.751	3.001	3.841	2.736
3.544	2.977	2.109	1.767	11.419	13.718	6.12	9.321	2.27	1.53	2.376	2.584	3.366	2.416
3.542	2.974	2.347	1.973	16.761	20.332	10.177	18.573	1.142	0.994	2.18	2.365	3.084	2.226
9.718	11.911	2.7	2.228	17.39	21.171	10.68	19.176	1.131	0.987	2.058	2.227	13.415	8.889
26.612	32.716	2.369	1.989	17.398	21.221	4.756	7.487	1.118	0.981	2.249	2.444	13.749	9.122
17.577	22.432	2.428	2.032	18.264	22.362	4.569	7.184	1.533	1.179	15.532	16.955	11.676	7.733
12.643	16.522	2.297	1.927	16.638	20.11	11.256	19.831	1.136	0.997	15.035	16.386	13.579	8.987
20.751	27.246	3.723	2.999	17.203	21.01	11.774	20.906	5.841	2.593	15.865	17.337	13.309	8.814
7.567	9.634	2.971	2.427	12.654	14.733	5.424	8.439	5.623	2.569	15.753	17.227	13.109	8.678
8.798	10.31	3.546	2.861	12.423	14.461	4.595	6.709	5.437	2.508	8.162	9.59	12.462	8.252
2.895	3.262	1.771	1.614	12.352	14.403	4.631	6.729	5.55	2.537	8.525	10.008	0.367	0.301
10.144	12.486	1.777	1.619	12.41	14.469	4.621	6.715	1.478	0.947	7.965	9.083	0.38	0.309
12.813	16.728	1.784	1.623	12.784	14.955	3.078	4.044	1.529	0.974	8.38	9.566	0.375	0.307
8.58	12.375	7.573	5.414	3.379	3.98	3.035	3.98	1.5	0.959	3.92	4.601	0.356	0.293
4.27	5.036	7.273	5.226	3.314	3.904	4.556	6.417	1.399	0.903	4.176	4.921	0.377	0.306
13.151	17.078	4.253	3.412	3.626	4.276	4.526	6.367	1.315	0.856	4.171	4.917	0.367	0.301
3.592	4.934	6.676	5.768	3.068	3.627	3.587	5.004	1.566	0.995	4.259	5.024	1.609	1.225
1.169	1.132	5.443	4.693	23.427	28.002	3.579	4.992	1.384	0.897	8.471	8.854	4.506	3.071
19.45	24.505	7.134	5.124	12.892	20.868	3.376	6.075	1.522	0.973	7.641	7.955	4.291	2.931
2.028	2.076	3.111	2.608	12.06	19.309	4.259	7.671	0.912	0.867	8.602	8.996	3.583	2.474
0.977	1.145	3.854	3.118	12.498	20.133	6.628	11.862	1.013	0.868	8.464	8.847	2.314	1.889
2.941	3.624	4.249	3.378	12.423	19.997	6.942	12.494	1.02	0.871	8.158	8.516	2.327	1.898
18.996	24.308	5.442	4.201	5.728	9.775	5.188	8.68	1.025	0.878	10.505	11.04	2.37	1.932
114.267	138.364	3.785	3.077	5.723	9.768	5.073	8.497	1.021	0.875	8.902	9.32	2.346	1.916
64.188	83.494	5.047	3.943	6.091	10.416	46.288	64.857	1.114	0.832	9.04	9.467	18.731	11.742
109.804	135.458	4.726	3.712	5.286	8.917	46.493	65.198	1.096	0.823	7.791	9.083	18.553	11.647
109.46	132.593	4.266	3.4	21.006	25.652	47.341	66.774	1.102	0.826	7.709	8.958	18.445	11.573
110.215	136.637	5.022	3.921	18.843	23.471	42.979	64.49	1.004	0.782	7.815	9.042	18.959	11.902
116.011	142.684	5.187	4.03	18.785	23.405	39.202	59.179	1.033	0.792	8.116	9.371	16.672	10.485
116.152	144.271	5.89	4.514	27.151	33.121	58.042	84.717	2.485	2.935	0.565	0.593	20.245	12.693
54.138	69.212	10.477	9.627	28.374	34.394	59.656	85.721	2.496	2.973	0.567	0.595	3.939	2.926
46.064	59.535	10.646	9.792	28.728	34.999	58.862	85.023	2.507	3.008	0.557	0.584	4.216	3.117
84.653	108.903	10.427	9.692	27.443	33.378	86.905	116.08	2.294	2.898	0.801	0.846	3.827	2.85
122.705	152.76	10.11	9.385	12.456	19.115	85.7	114.734	2.444	2.883	3.269	3.503	3.771	2.806
109.957	135.121	10.074	9.403	12.596	18.962	27.846	43.279	1.946	2.158	3.051	3.266	11.784	7.889
15.629	21.625	10.594	9.88	12.445	19.343	27.184	42.344	5.733	3.545	2.884	3.078	12.196	8.11
15.585	21.487	10.757	9.966	12.428	19.445	46.126	60.861	5.265	3.295	2.731	2.906	12.736	8.387
15.744	21.725	9.513	8.594	3.322	4.128	47.292	61.748	4.916	3.108	1.121	1.152	12.594	8.327
15.543	21.413	8.867	8.196	3.464	4.291	74.796	95.495	4.881	3.089	1.13	1.163	19.507	12.427
15.335	21.122	8.348	7.74	3.513	4.338	73.518	93.174	5.727	3.541	1.081	1.104	19.251	12.253
15.457	21.293	13.059	9.122	3.361	4.561	76.789	98.979	4.832	3.063	1.17	1.228	19.591	12.477
15.472	21.336	12.451	8.678	3.235	4.276	40.219	56.03	3.218	1.955	1.171	1.198	19.898	12.666
14.791	20.396	10.494	7.34	3.22	4.246	40.394	56.782	4.035	2.28	1.536	1.64	2.7	2.109
14.649	20.214	12.345	8.643	3.301	4.422	48.275	64.561	4.136	2.313	1.456	1.551	2.684	2.098
8.57	12.339	11.755	8.221	5.88	7.173	48.135	64.651	4.283	2.367	1.391	1.479	2.714	2.117
10.352	15.182	8.463	6.014	5.403	6.539	32.673	51.099	1.192	1.206	3.712	3.145	2.734	2.128
12.216	17.008	4.143	3.084	5.733	6.969	25.903	43.038	1.189	1.203	4.003	3.301	14.369	8.985
7.804	11.317	11.887	8.374	5.656	6.893	23.422	37.923	1.174	1.201	3.927	3.268	14.951	9.32
15.164	22.038	9.736	6.816	6.201	7.619	24.545	39.872	1.443	1.294	4.002	3.275	14.918	9.31
40.918	54.766	10.47	7.293	5.892	11.226	8.094	13.507	1.445	1.296	2.22	2.497	15.964	9.899
49.269	65.693	3.789	3.034	5.796	11.046	6.98	11.54	1.437	1.288	2.248	2.537	15.586	9.673
48.781	65.414	3.969	3.159	6.028	11.462	8.158	13.063	1.132	0.989	2.25	2.535	14.653	9.165
40.435	54.078	3.483	2.808	6.19	11.756	7.513	11.989	1.117	0.982	2.259	2.549	2.015	1.701
43.374	58.014	4.372	3.444	5.901	9.032	2.096	3.028	1.112	0.981	3.118	3.156	2.007	1.697
44.269	59.265	6.057	4.62	5.891	9.023	2.048	2.903	1.835	1.3	3.062	3.15	2.112	1.757
33.96	45.424	5.168	3.999	5.837	8.913	4.555	7.631	1.874	1.309	3.083	3.163	2.014	1.696
9.925	14.011	5.553	4.27	10.891	14.849	3.953	6.406	1.888	1.316	2.283	2.708	2.01	1.702
10.135	14.275	4.984	3.872	10.167	14.007	1.183	1.071	0.961	0.723	2.383	2.837	4.398	3.149
9.919	14.004	4.438	3.489	10.89	14.741	1.09	0.957	0.939	0.709	1.055	1.131	4.834	3.438
9.819	13.878	3.547	2.882	11.893	15.79	1.083	0.935	1.088	0.795	1.053	1.129	1.983	1.798
10.072	14.196	4.334	3.367	11.117	15.073	37.172	65.658	1.841	2.383	1.901	1.764	1.985	1.797
9.682	13.704	4.264	3.372	2.319	2.693	35.72	63.029	1.939	2.497	2.053	1.981	1.991	1.79
6.145	7.406	7.956	5.73	2.526	2.938	32.976	58.053	1.91	2.434	1.898	1.805	1.985	1.788
7.708	8.38	7.695	5.51	2.497	2.904	37.084	65.511	1.551	1.775	0.575	0.603	7.608	4.995
6.35	7.37	7.97	5.721	2.401	2.79	36.151	63.811	1.337	1.48	0.583	0.612	7.348	4.841
6.416	7.433	7.94	5.654	9.133	11.042	32.693	57.527	1.427	1.639	0.69	0.719	7.819	5.121
5.733	6.921	13.172	13.101	8.92	10.771	23.475	40.312	1.602	1.843	0.699	0.729	6.609	4.392
33.151	45.086	14.361	14.283	8.877	10.745	17.379	29.116	7.052	2.933	6.346	6.521	14.886	9.64
32.979	45.14	13.571	13.501	9.232	11.192	21.222	35.951	6.997	2.91	6.449	6.627	14.74	9.554
32.505	44.311	13.349	13.272	12.569	16.544	20.289	34.04	6.984	2.904	0.907	0.961	14.862	9.626
33.138	45.054	6.389	4.505	12.559	16.599	19.576	32.792	0.989	0.638	0.907	0.962	14.954	9.681
60.533	81.019	6.537	4.614	13.143	17.071	18.529	30.705	1.174	0.734	7.654	7.849	10.724	6.723
59.787	80.32	5.368	3.864	12.367	14.771	8.1	12.985	1.158	0.726	7.943	8.172	12.073	7.559
59.401	79.856	4.189	3.182	12.185	14.564	7.293	11.496	1.156	0.727	7.981	8.175	11.746	7.362
60.201	80.567	3.843	2.919	12.714	15.186	7.71	12.267	1.591	1.095	4.101	4.438	11.675	7.315
59.644	79.989	4.08	3.105	12.267	14.652	8.261	14.539	1.473	1.03	4.184	4.535	18.784	11.923
60.295	80.787	3.733	2.834	19.437	25.028	7.963	14.019	1.415	0.994	1.568	1.287	18.769	11.951
4.343	5.491	4.782	3.796	21.491	27.395	8.257	14.515	1.525	1.059	2.769	3.047	18.663	11.864
4.429	5.604	4.849	3.852	12.254	16.059	7.142	12.563	1.823	1.038	2.713	2.985	18.509	11.754
4.38	5.54	4.746	3.758	11.733	15.42	7.973	14.061	1.996	1.125	1.461	1.591	31.906	19.022
4.534	5.74	5.042	3.946	17.428	21.591	8.646	15.218	2.117	1.181	0.796	0.859	29.563	17.929
3.81	4.788	5.079	3.971	17.003	21.087	6.477	10.335	1.848	1.059	0.709	0.749	29.841	18.055
8.192	10.963	4.807	3.839	19.986	24.695	7.519	11.895	2.237	1.233	0.695	0.751	30.214	18.181
7.725	10.443	4.046	3.479	18.684	23.149	7.505	11.925	1.689	0.979	0.556	0.58	29.393	17.831
8.019	10.763	3.006	2.535	9.618	14.301	8.003	12.555	0.571	0.454	0.153	0.153	1.972	1.622
7.585	10.334	2.675	2.275	10.031	14.97	2.33	4.353	0.582	0.461	0.105	0.105	2.016	1.642
7.626	10.349	2.502	2.156	9.915	14.796	2.33	4.355	2.527	1.294	0.484	0.499	2.099	1.697
37.433	48.324	2.749	2.343	1.483	1.726	2.41	4.308	2.48	1.282	4.007	4.306	2.071	1.675
40.985	52.456	2.469	2.126	1.456	1.692	63.929	85.811	2.829	1.386	4.002	4.298	2.201	1.765
41.01	52.497	3.182	2.666	8.672	10.098	60.95	82.691	2.555	1.298	3.987	4.281	6.251	3.95
34.638	44.96	2.496	2.256	9.781	11.426	63.239	85.116	1.483	1.075	1.363	1.468	5.782	3.664
17.66	29.576	2.582	2.313	9.238	10.763	13.902	21.893	1.289	0.931	1.538	1.658	5.76	3.653
18.979	31.654	2.644	2.372	8.837	10.276	13.51	21.351	1.461	1.063	1.712	1.851	5.637	3.576
18.619	31.068	2.624	2.365	9.11	10.61	9.689	16.013	1.281	0.883	2.76	2.824	2.768	2.237
28.881	46.121	2.61	2.364	9.32	10.867	10.161	16.867	1.281	0.884	3.033	3.097	2.707	2.198
28.569	45.123	2.498	2.247	5.808	6.734	10.165	16.893	1.374	1.04	2.871	2.932	2.74	2.218
28.551	45.436	4.115	3.102	5.194	6.022	7.154	10.047	1.851	1.054	1.514	1.606	2.772	2.239
36.466	50.222	4.53	3.379	5.445	6.313	7.339	10.263	1.841	1.053	1.491	1.581	6.305	4.238
35.167	48.295	4.484	3.364	4.898	5.682	7.434	10.524	1.848	1.054	1.223	1.297	6.205	4.175
37.361	51.551	4.128	3.112	4.703	5.454	7.437	10.632	1.823	1.042	1.085	1.149	6.441	4.32
34.956	47.989	3.955	2.998	14.199	16.526	12.178	19.973	2.454	1.314	2.51	2.747	6.675	4.467
4.365	5.623	6.69	4.896	13.727	15.975	12.385	20.329	2.522	1.343	2.013	2.171	6.607	4.423
4.338	5.587	6.661	4.906	13.473	15.666	6.013	10.313	2.485	1.335	1.967	2.119	0.305	0.265
4.087	5.277	6.631	4.826	14.023	16.339	6.231	10.649	1.283	0.814	0.866	0.889	0.324	0.28
5.305	6.835	6.637	4.875	13.73	15.97	6.036	10.372	1.344	0.848	0.878	0.901	0.33	0.285
5.053	6.49	6.566	4.815	2.499	2.253	8.714	15.165	0.483	0.378	0.812	0.836	0.526	0.38
4.39	5.652	6.067	4.532	2.475	2.161	8.958	15.602	0.472	0.374	0.816	0.841	0.523	0.378
4.546	5.842	2.749	2.173	2.474	2.158	8.46	14.743	1.299	0.83	1.118	1.168	0.971	0.751
4.142	5.332	2.717	2.155	2.496	2.182	2.364	3.143	1.204	0.779	1.438	1.518	0.954	0.737
4.953	6.397	2.672	2.127	2.488	2.163	2.358	3.136	1.245	0.801	1.502	1.587	0.915	0.708
3.223	4.035	2.839	2.274	3.899	3.339	2.574	3.479	1.24	0.781	1.454	1.535	0.926	0.716
3.182	4.013	2.662	2.126	4.224	3.995	2.446	3.181	1.21	0.764	0.84	0.871	0.929	0.718
3.186	4.043	1.339	1.168	3.939	3.425	2.302	3.063	1.615	1.034	0.837	0.868	7.716	5.38
3.11	3.915	1.395	1.21	4.192	3.957	0.553	0.581	1.588	1.018	1.378	1.451	8.07	5.615
3.218	4.09	1.415	1.225	4.408	4.375	0.577	0.617	3.873	2.276	1.425	1.503	8.384	5.822
3.225	4.08	1.581	1.349	2.756	3.24	0.55	0.579	1.076	0.787	1.348	1.418	8.176	5.685
3.045	3.807	1.31	1.146	2.76	3.249	0.651	0.713	1.909	2.435	1.021	1.033	7.827	5.464
3.255	4.082	1.391	1.305	2.77	3.264	1.395	1.624	NaN	NaN	0.486	0.494	2.756	2.052
7.985	11.107	3.559	2.936	2.771	3.262	1.339	1.585	NaN	NaN	0.504	0.513	2.779	2.07
6.642	9.167	1.818	1.607	2.719	3.201	1.334	1.577	NaN	NaN	2.002	2.15	2.836	2.111
9.473	13.213	4.233	3.452	7.997	9.252	1.332	1.58	NaN	NaN	2.086	2.242	2.815	2.1
7.314	10.161	2.562	2.165	7.997	9.252	0.825	0.846	NaN	NaN	2.59	2.821	2.253	2.402
7.984	11.094	10.066	8.606	7.972	9.221	0.823	0.839	NaN	NaN	0.748	0.789	2.244	2.394
9.01	12.525	9.99	8.57	8.144	9.416	0.812	0.81	NaN	NaN	1.355	1.126	4.413	3.038
1.705	1.899	5.464	3.919	7.971	9.222	0.798	0.777	NaN	NaN	4.199	4.514	4.416	3.03
1.655	1.849	5.88	4.176	2.681	3.015	2.74	4.094	NaN	NaN	4.139	4.45	1.444	1.12
1.324	1.439	6.545	4.587	2.756	3.096	2.854	4.285	NaN	NaN	3.95	4.25	1.545	1.193
1.38	1.497	6.15	4.343	2.738	3.081	2.899	4.361	NaN	NaN	0.903	0.951	1.312	1.234
1.592	1.766	5.779	4.111	12.256	16.062	5.828	11.847	NaN	NaN	2.4	2.859	1.269	1.076
7.458	10.068	4.122	3.383	12.236	14.614	5.013	9.977	NaN	NaN	1.223	1.334	0.695	0.555
6.951	9.328	4.287	3.468	12.569	19.031	4.752	9.394	NaN	NaN	0.962	1.044	0.762	0.608
6.773	9.06	4.266	3.452	33.736	40.478	4.442	8.694	NaN	NaN	14.632	15.92	1.438	1.085
7.088	9.522	4.279	3.461	10.738	12.621	5.182	10.378	NaN	NaN	0.565	0.593	1.454	1.097
7.174	9.661	2.678	2.25	34.66	41.701	1.316	1.424	NaN	NaN	NaN	NaN	0.796	0.628
6.793	9.095	2.635	2.214	3.492	4.323	1.661	1.851	NaN	NaN	NaN	NaN	0.815	0.643
21.967	27.1	2.632	2.213	12.785	14.877	1.629	1.81	NaN	NaN	NaN	NaN	0.772	0.61
22.984	28.394	2.857	2.423	12.411	14.454	1.642	1.83	NaN	NaN	NaN	NaN	0.533	0.449
23.781	29.56	2.254	1.853	12.252	14.302	1.61	1.788	NaN	NaN	NaN	NaN	0.52	0.437
23.267	28.741	2.347	1.921	23.097	28.61	1.936	2.337	NaN	NaN	NaN	NaN	0.315	0.272
22.661	27.935	2.3	1.887	7.883	10.607	2.105	2.594	NaN	NaN	NaN	NaN	0.322	0.278
7.368	9.386	2.083	1.729	10.043	13.745	2.109	2.595	NaN	NaN	NaN	NaN	1.519	1.17
7.794	9.925	2.871	2.334	25.372	31.429	2.009	2.44	NaN	NaN	NaN	NaN	1.528	1.176
7.456	9.485	2.889	2.346	35.825	43.063	2.004	2.432	NaN	NaN	NaN	NaN	4.367	3.131
7.505	9.554	2.871	2.33	18.587	23.344	2.101	2.796	NaN	NaN	NaN	NaN	3.587	2.587
7.352	9.359	2.781	2.204	19.535	24.528	2.332	3.307	NaN	NaN	NaN	NaN	3.709	2.674
7.521	9.557	2.779	2.202	20.516	25.838	2.219	3.094	NaN	NaN	NaN	NaN	1.117	0.864
10.168	13.444	3.49	3.181	24.522	30.37	2.177	3.016	NaN	NaN	NaN	NaN	1.067	0.822
7.721	10.123	3.584	3.246	17.471	21.954	2.077	2.815	NaN	NaN	NaN	NaN	0.813	0.712
10.558	13.973	4.066	3.589	17.436	21.93	2.01	1.323	NaN	NaN	NaN	NaN	0.816	0.712
11.281	14.952	4.005	3.536	21.452	26.496	1.994	1.309	NaN	NaN	NaN	NaN	1.949	1.483
9.961	13.163	1.962	1.773	18.71	23.437	1.984	1.296	NaN	NaN	NaN	NaN	1.976	1.498
8.704	11.458	1.907	1.727	25.436	31.947	1.978	1.281	NaN	NaN	NaN	NaN	0.423	0.374
2.52	2.954	1.274	1.293	14.473	17.037	1.989	1.282	NaN	NaN	NaN	NaN	0.426	0.376
2.501	2.909	1.263	1.284	15.107	17.638	1.544	1.679	NaN	NaN	NaN	NaN	0.317	0.271
2.507	2.956	1.868	1.653	15.78	18.392	1.497	1.621	NaN	NaN	NaN	NaN	0.317	0.27
2.234	2.416	1.819	1.614	14.646	17.149	1.509	1.638	NaN	NaN	NaN	NaN	0.414	0.332
30.198	35.297	2.196	1.904	14.864	17.626	1.568	1.712	NaN	NaN	NaN	NaN	0.421	0.338
30.738	35.956	1.845	1.606	12.446	14.572	1.767	2.006	NaN	NaN	NaN	NaN	0.108	0.106
30.721	35.963	1.821	1.587	15.372	17.955	1.758	1.995	NaN	NaN	NaN	NaN	0.108	0.106
30.556	35.776	1.804	1.573	12.64	14.937	1.74	1.974	NaN	NaN	NaN	NaN	0.179	0.167
33.739	39.284	1.854	1.613	16.296	18.943	1.751	1.987	NaN	NaN	NaN	NaN	0.178	0.165
29.516	34.37	1.761	1.523	8.653	10.218	1.76	1.999	NaN	NaN	NaN	NaN	0.163	0.158
5.479	7.232	1.857	1.596	10.653	13.906	2.236	3.095	NaN	NaN	NaN	NaN	0.161	0.157
5.506	7.27	1.999	1.704	9.603	12.291	1.879	2.424	NaN	NaN	NaN	NaN	0.182	0.162
5.616	7.424	1.416	1.26	10.031	13.083	1.824	2.324	NaN	NaN	NaN	NaN	0.183	0.163
5.359	7.065	4.399	3.492	9.292	11.93	1.922	2.501	NaN	NaN	NaN	NaN	0.169	0.169
5.233	6.889	4.623	3.662	8.773	11.379	1.866	2.398	NaN	NaN	NaN	NaN	0.17	0.169
5.197	6.681	4.355	3.46	12.075	15.721	3.296	5.115	NaN	NaN	NaN	NaN	0.151	0.142
5.085	6.534	4.749	3.758	9.945	12.936	3.414	5.328	NaN	NaN	NaN	NaN	0.15	0.142
5.084	6.531	1.282	1.139	8.386	10.86	3.572	5.608	NaN	NaN	NaN	NaN	3.818	2.842
13.4	16.04	1.272	1.131	8.255	10.578	3.717	5.868	NaN	NaN	NaN	NaN	12.314	8.211
13.012	15.591	0.793	0.752	14.089	18.321	2.723	2.638	NaN	NaN	NaN	NaN	1.284	1.189
13.565	16.234	1.642	1.437	4.814	5.93	77.169	103.277	NaN	NaN	NaN	NaN	4.388	2.992
12.499	14.998	2.09	1.789	4.425	5.398	73.875	97.662	NaN	NaN	NaN	NaN	4.056	2.781
1.448	1.789	1.667	1.458	4.971	6.127	25.201	41.462	NaN	NaN	NaN	NaN	30.395	18.281
1.475	1.827	1.739	1.515	4.06	4.914	33.454	46.257	NaN	NaN	NaN	NaN	2.643	2.155
1.402	1.734	1.585	1.395	5.795	7.257	40.531	58.14	NaN	NaN	NaN	NaN	2.711	2.199
3.547	4.636	2.848	2.366	4.26	5.289	23.859	40.944	NaN	NaN	NaN	NaN	20.854	13.576
3.52	4.592	2.267	1.917	5.093	6.42	14.878	23.241	NaN	NaN	NaN	NaN	22.946	14.872
1.979	2.191	2.868	2.384	4.535	5.685	5.768	8.799	NaN	NaN	NaN	NaN	11.615	7.753
1.981	2.195	0.742	0.736	4.357	5.428	5.808	8.848	NaN	NaN	NaN	NaN	19.765	12.574
1.981	2.19	0.755	0.748	4.55	5.688	6.256	9.43	NaN	NaN	NaN	NaN	19.495	12.418
4.052	4.211	0.761	0.754	3.795	4.693	38.79	53.881	NaN	NaN	NaN	NaN	3.445	2.487
3.969	4.053	6.529	4.842	6.019	7.658	6.118	10.494	NaN	NaN	NaN	NaN	0.477	0.349
4.072	4.259	5.878	4.401	3.679	4.063	1.171	1.055	NaN	NaN	NaN	NaN	2.756	2.051
0.868	0.987	6.58	4.777	31.957	38.466	15.843	27.604	NaN	NaN	NaN	NaN	2.813	2.094
0.879	1.001	5.184	4.008	31.457	37.923	2.835	4.001	NaN	NaN	NaN	NaN	2.772	2.065
2.624	3.099	3.489	2.877	32.153	38.731	4.432	6.823	NaN	NaN	NaN	NaN	2.798	2.086
2.389	2.797	4.625	3.622	34.069	40.948	85.279	119.268	NaN	NaN	NaN	NaN	0.183	0.163
2.496	2.926	NaN	NaN	34.933	41.951	1.456	1.993	NaN	NaN	NaN	NaN	22.891	14.87
3.117	3.874	NaN	NaN	31.109	37.499	61.127	76.632	NaN	NaN	NaN	NaN	7.031	4.831
2.968	3.674	NaN	NaN	31.275	37.703	59.391	74.279	NaN	NaN	NaN	NaN	18.755	11.93
1.62	1.699	NaN	NaN	24.684	35.07	15.946	26.715	NaN	NaN	NaN	NaN	18.429	11.696
1.627	1.705	NaN	NaN	29.129	38.48	9.233	15.241	NaN	NaN	NaN	NaN	13.455	8.916
1.507	1.593	NaN	NaN	28.456	37.965	7.756	12.376	NaN	NaN	NaN	NaN	0.41	0.329
1.032	1.162	NaN	NaN	27.949	37.579	1.341	1.807	NaN	NaN	NaN	NaN	2.72	2.205
1.009	1.134	NaN	NaN	30.648	39.936	1.753	2.455	NaN	NaN	NaN	NaN	2.726	2.21
1.206	1.276	NaN	NaN	13.955	19.749	56.962	71.836	NaN	NaN	NaN	NaN	18.342	12.074
1.206	1.277	NaN	NaN	13.953	19.688	5.132	7.532	NaN	NaN	NaN	NaN	13.277	8.87
1.207	1.278	NaN	NaN	13.947	19.805	3.414	4.95	NaN	NaN	NaN	NaN	17.983	11.869
1.349	1.411	NaN	NaN	13.972	19.583	5.618	8.966	NaN	NaN	NaN	NaN	14.521	9.777
1.35	1.411	NaN	NaN	24.457	29.682	3.667	5.769	NaN	NaN	NaN	NaN	14.597	9.518
23.798	29.603	NaN	NaN	25.256	30.677	5.414	8.222	NaN	NaN	NaN	NaN	12.004	8.099
7.158	10.439	NaN	NaN	27.614	33.624	5.447	8.292	NaN	NaN	NaN	NaN	13.476	9.112
12.366	17.551	NaN	NaN	24.745	29.925	5.846	8.407	NaN	NaN	NaN	NaN	9.322	6.453
15.581	21.532	NaN	NaN	16.159	19.814	4.277	6.419	NaN	NaN	NaN	NaN	12.321	8.209
44.487	59.536	NaN	NaN	16.601	20.36	78.303	104.878	NaN	NaN	NaN	NaN	13.269	8.928
5.247	6.745	NaN	NaN	15.814	19.388	7.375	11.764	NaN	NaN	NaN	NaN	12.045	8.113
12.992	15.563	NaN	NaN	14.397	17.636	5.831	8.897	NaN	NaN	NaN	NaN	14.613	9.835
3.507	4.572	NaN	NaN	11.229	13.249	20.162	32.49	NaN	NaN	NaN	NaN	11.7	7.872
39.983	51.299	NaN	NaN	11.233	13.278	16.105	25.686	NaN	NaN	NaN	NaN	14.549	9.782
15.509	21.359	NaN	NaN	11.299	13.351	18.088	29.068	NaN	NaN	NaN	NaN	16.059	10.657
7.089	9.533	NaN	NaN	11.244	13.3	18.582	29.785	NaN	NaN	NaN	NaN	9.258	6.365
7.288	9.284	NaN	NaN	9.13	10.982	16.252	26	NaN	NaN	NaN	NaN	8.967	6.193
15.553	21.439	NaN	NaN	10.026	12.033	40.292	65.986	NaN	NaN	NaN	NaN	8.54	5.972
2.953	3.654	NaN	NaN	10.886	13.116	18.79	30.194	NaN	NaN	NaN	NaN	8.503	5.973
1.655	1.732	NaN	NaN	9.623	11.523	10.019	15.777	NaN	NaN	NaN	NaN	10.212	7.11
12.276	17.075	NaN	NaN	9.097	10.981	15.529	24.737	NaN	NaN	NaN	NaN	9.339	6.529
2.246	2.425	NaN	NaN	13.485	16.072	12.599	19.891	NaN	NaN	NaN	NaN	8.936	6.251
0.947	1.088	NaN	NaN	13.578	16.182	85.496	133.266	NaN	NaN	NaN	NaN	10.044	6.989
4.438	5.616	NaN	NaN	13.292	15.82	85.121	134.09	NaN	NaN	NaN	NaN	9.605	6.698
4.35	5.602	NaN	NaN	18.611	22.967	84.568	132.452	NaN	NaN	NaN	NaN	2.243	1.624
24.666	33.925	NaN	NaN	17.859	22.026	74.935	120.11	NaN	NaN	NaN	NaN	2.756	1.924
11.52	15.887	NaN	NaN	18.207	22.508	74.819	118.955	NaN	NaN	NaN	NaN	2.497	1.744
20.182	27.834	NaN	NaN	17.799	22.063	84.106	131.368	NaN	NaN	NaN	NaN	2.828	1.973
24.726	33.994	NaN	NaN	17.167	21.05	86.526	139.357	NaN	NaN	NaN	NaN	2.847	1.991
18.911	26.114	NaN	NaN	18.997	23.652	76.424	123.635	NaN	NaN	NaN	NaN	1.87	1.311
20.875	28.784	NaN	NaN	5.408	6.132	81.594	126.345	NaN	NaN	NaN	NaN	2.113	1.479
18.701	25.829	NaN	NaN	5.203	5.875	63.7	105.734	NaN	NaN	NaN	NaN	2.748	1.918
10.292	14.197	NaN	NaN	5.29	5.993	58.705	96.818	NaN	NaN	NaN	NaN	2.5	1.746
7.802	10.634	NaN	NaN	5.331	6.043	61.315	101.333	NaN	NaN	NaN	NaN	2.353	1.644
13.332	18.405	NaN	NaN	5.975	6.859	60.899	100.483	NaN	NaN	NaN	NaN	2.771	1.987
17.997	24.912	NaN	NaN	1.872	2.082	59.688	98.588	NaN	NaN	NaN	NaN	1.996	1.472
20.041	27.612	NaN	NaN	1.858	2.065	64.512	107.03	NaN	NaN	NaN	NaN	3.126	2.231
24.368	29.268	NaN	NaN	1.967	2.212	56.377	92.692	NaN	NaN	NaN	NaN	3.421	2.415
24.499	29.76	NaN	NaN	1.952	2.199	57.972	95.134	NaN	NaN	NaN	NaN	3.133	2.226
24.719	30.086	NaN	NaN	5.413	6.919	38.048	61.351	NaN	NaN	NaN	NaN	3.609	2.542
24.496	29.479	NaN	NaN	17.06	22.336	39.856	63.516	NaN	NaN	NaN	NaN	3.634	2.563
24.246	29.09	NaN	NaN	17.008	22.508	37.097	59.413	NaN	NaN	NaN	NaN	0.22	0.192
23.884	28.69	NaN	NaN	17.056	22.51	40.295	64.744	NaN	NaN	NaN	NaN	0.227	0.197
24.259	29.797	NaN	NaN	17.068	22.55	36.746	58.541	NaN	NaN	NaN	NaN	0.223	0.194
23.616	28.348	NaN	NaN	16.213	22.892	0.898	1.144	NaN	NaN	NaN	NaN	0.217	0.19
23.406	28.05	NaN	NaN	16.188	22.873	0.897	1.141	NaN	NaN	NaN	NaN	0.221	0.192
13.436	14.654	NaN	NaN	16.459	23.142	0.8	0.969	NaN	NaN	NaN	NaN	0.217	0.19
9.972	11.149	NaN	NaN	16.004	22.505	0.838	1.042	NaN	NaN	NaN	NaN	1.535	1.07
20.353	24.184	NaN	NaN	23.73	30.834	2.547	3.66	NaN	NaN	NaN	NaN	1.013	0.765
14.031	15.884	NaN	NaN	21.964	30.717	2.237	3.172	NaN	NaN	NaN	NaN	0.976	0.738
19.06	22.747	NaN	NaN	21.715	30.423	2.578	3.715	NaN	NaN	NaN	NaN	0.881	0.669
30.179	41.397	NaN	NaN	18.097	24.621	2.157	3.046	NaN	NaN	NaN	NaN	3.665	2.744
29.076	39.619	NaN	NaN	18.875	25.041	2.447	3.508	NaN	NaN	NaN	NaN	3.691	2.758
30.29	41.305	NaN	NaN	18.523	24.836	2.329	3.32	NaN	NaN	NaN	NaN	3.395	2.553
30.13	41.366	NaN	NaN	18.497	24.859	2.139	3.012	NaN	NaN	NaN	NaN	3.382	2.547
30.501	41.796	NaN	NaN	20.989	33.293	105.158	161.218	NaN	NaN	NaN	NaN	19.63	12.308
30.352	41.548	NaN	NaN	21.028	33.147	105.773	162.439	NaN	NaN	NaN	NaN	19.158	12.03
28.151	38.874	NaN	NaN	21.058	33.553	109.776	167.446	NaN	NaN	NaN	NaN	19.335	12.13
18.396	23.446	NaN	NaN	21.079	33.667	104.932	161.167	NaN	NaN	NaN	NaN	19.158	12.038
18.897	24.156	NaN	NaN	14.93	18.852	69.52	110.822	NaN	NaN	NaN	NaN	18.64	11.69
18.338	23.374	NaN	NaN	15.154	19.099	72.725	111.976	NaN	NaN	NaN	NaN	19.674	12.354
17.984	22.895	NaN	NaN	15.57	19.548	71.044	113.588	NaN	NaN	NaN	NaN	4.054	2.908
18.701	23.888	NaN	NaN	17.022	21.932	69.323	109.399	NaN	NaN	NaN	NaN	4.289	3.078
17.744	22.537	NaN	NaN	17.023	21.854	72.5	117.748	NaN	NaN	NaN	NaN	4.108	2.951
4.469	3.988	NaN	NaN	17.014	21.839	72.411	117.689	NaN	NaN	NaN	NaN	3.681	2.642
4.084	3.562	NaN	NaN	17.029	21.899	70.12	109.911	NaN	NaN	NaN	NaN	15.179	9.897
4.214	3.741	NaN	NaN	13.366	16.443	72.992	111.17	NaN	NaN	NaN	NaN	14.7	9.581
4.273	3.792	NaN	NaN	11.353	13.895	74.273	105.313	NaN	NaN	NaN	NaN	13.749	8.962
4.393	3.928	NaN	NaN	12.539	15.421	74.867	105.48	NaN	NaN	NaN	NaN	14.34	9.342
25.249	37.069	NaN	NaN	12.905	15.808	76.228	106.962	NaN	NaN	NaN	NaN	16.576	10.525
24.977	36.846	NaN	NaN	15.206	18.727	74.672	105.785	NaN	NaN	NaN	NaN	16.59	10.535
25.052	36.826	NaN	NaN	21.889	35.62	72.002	102.581	NaN	NaN	NaN	NaN	16.615	10.548
25.166	36.939	NaN	NaN	21.804	35.473	79.884	112.35	NaN	NaN	NaN	NaN	16.725	10.611
43.326	55.701	NaN	NaN	21.999	35.729	98.379	143.993	NaN	NaN	NaN	NaN	4.241	3.097
42.636	54.845	NaN	NaN	22.137	35.959	102.241	152.769	NaN	NaN	NaN	NaN	4.066	2.977
40.6	52.372	NaN	NaN	18.01	23.314	94.144	139.718	NaN	NaN	NaN	NaN	4.215	3.078
43.363	55.739	NaN	NaN	17.939	23.23	66.713	104.888	NaN	NaN	NaN	NaN	4.087	2.988
41.912	53.969	NaN	NaN	18.105	23.423	67.832	104.762	NaN	NaN	NaN	NaN	23.56	14.784
43.297	55.658	NaN	NaN	3.984	4.774	89.314	130.686	NaN	NaN	NaN	NaN	23.858	14.964
2.445	3.074	NaN	NaN	3.822	4.59	69.749	108.184	NaN	NaN	NaN	NaN	23.32	14.653
2.504	3.157	NaN	NaN	4.006	4.796	2.431	3.381	NaN	NaN	NaN	NaN	24.675	15.449
2.45	3.079	NaN	NaN	4.438	5.303	2.466	3.453	NaN	NaN	NaN	NaN	24.924	15.589
2.601	3.297	NaN	NaN	4.036	4.831	2.435	3.408	NaN	NaN	NaN	NaN	22.73	14.31
2.123	2.636	NaN	NaN	2.85	3.428	2.519	3.496	NaN	NaN	NaN	NaN	6.549	4.507
1.969	2.342	NaN	NaN	2.529	3.044	2.417	3.364	NaN	NaN	NaN	NaN	6.473	4.456
2.138	2.564	NaN	NaN	2.511	3.02	2.263	2.871	NaN	NaN	NaN	NaN	7.182	4.933
2.02	2.409	NaN	NaN	2.522	3.033	2.283	2.879	NaN	NaN	NaN	NaN	6.682	4.597
2.268	2.737	NaN	NaN	15.551	19.664	2.412	3.068	NaN	NaN	NaN	NaN	6.791	4.672
2.2	2.647	NaN	NaN	15.389	19.402	2.245	2.803	NaN	NaN	NaN	NaN	2.195	1.587
23.404	31.081	NaN	NaN	15.551	19.669	1.495	2.089	NaN	NaN	NaN	NaN	2.425	1.744
22.996	30.656	NaN	NaN	15.791	20.059	1.477	2.061	NaN	NaN	NaN	NaN	2.038	1.808
23.266	30.995	NaN	NaN	6.884	8.252	1.544	2.163	NaN	NaN	NaN	NaN	2.057	1.818
23.186	30.712	NaN	NaN	6.041	7.232	1.441	2.005	NaN	NaN	NaN	NaN	2.095	1.839
6.718	7.595	NaN	NaN	8.198	9.831	24.601	39.255	NaN	NaN	NaN	NaN	2.077	1.828
7.569	8.616	NaN	NaN	17.324	21.636	12.187	20.027	NaN	NaN	NaN	NaN	25.173	15.694
7.348	8.345	NaN	NaN	17.362	21.594	2.491	3.893	NaN	NaN	NaN	NaN	24.278	15.159
12.082	17.371	NaN	NaN	17.735	22.13	29.878	47.402	NaN	NaN	NaN	NaN	25.437	15.861
12.584	18.176	NaN	NaN	17.214	21.501	18.196	29.334	NaN	NaN	NaN	NaN	22.649	14.163
12.149	17.577	NaN	NaN	13.188	15.44	24.262	38.718	NaN	NaN	NaN	NaN	18.905	12.09
21.838	31.456	NaN	NaN	13.6	15.915	23.871	38.117	NaN	NaN	NaN	NaN	19.15	12.248
21.81	31.527	NaN	NaN	8.887	10.681	20.586	33.05	NaN	NaN	NaN	NaN	19.029	12.17
22.038	31.755	NaN	NaN	9.571	11.516	35.04	55.429	NaN	NaN	NaN	NaN	18.874	12.069
21.692	31.319	NaN	NaN	6.238	7.748	26.784	42.667	NaN	NaN	NaN	NaN	19.479	12.493
11.994	16.365	NaN	NaN	6.107	7.575	14.048	22.905	NaN	NaN	NaN	NaN	19.974	12.882
11.895	16.238	NaN	NaN	6.586	8.157	18.221	29.538	NaN	NaN	NaN	NaN	19.593	12.638
11.599	15.843	NaN	NaN	6.301	7.783	24.542	41.227	NaN	NaN	NaN	NaN	19.696	12.696
10.028	13.941	NaN	NaN	18.001	22.848	23.213	37.951	NaN	NaN	NaN	NaN	20.423	13.521
10.068	14.014	NaN	NaN	17.748	22.309	26.972	44.937	NaN	NaN	NaN	NaN	19.471	12.94
11.707	16.006	NaN	NaN	17.839	22.513	23.637	39.181	NaN	NaN	NaN	NaN	19.761	13.109
10.766	14.835	NaN	NaN	1.628	1.895	26.181	43.486	NaN	NaN	NaN	NaN	19.737	13.084
11.977	16.328	NaN	NaN	1.604	1.866	27.177	45.593	NaN	NaN	NaN	NaN	14.559	9.687
10.542	14.531	NaN	NaN	1.983	2.142	7.871	13.456	NaN	NaN	NaN	NaN	15.768	10.453
4.008	5.135	NaN	NaN	2.173	2.43	9.72	16.733	NaN	NaN	NaN	NaN	15.593	10.343
3.778	4.834	NaN	NaN	2.122	2.368	12.773	22.096	NaN	NaN	NaN	NaN	15.002	9.976
3.601	4.6	NaN	NaN	2.079	2.314	8.707	14.943	NaN	NaN	NaN	NaN	15.696	10.411
3.808	4.877	NaN	NaN	2.103	2.341	23.264	37.083	NaN	NaN	NaN	NaN	3.69	3.061
3.392	4.32	NaN	NaN	2.117	2.355	16.384	27.443	NaN	NaN	NaN	NaN	3.881	3.196
3.696	4.723	NaN	NaN	2.226	2.032	17.343	28.766	NaN	NaN	NaN	NaN	3.99	3.269
4.011	5.151	NaN	NaN	2.076	1.864	37.726	65.238	NaN	NaN	NaN	NaN	3.996	3.275
3.94	5.041	NaN	NaN	2.131	1.928	35.15	60.325	NaN	NaN	NaN	NaN	4.116	3.352
5.852	7.424	NaN	NaN	2.13	1.894	37.123	63.981	NaN	NaN	NaN	NaN	6.851	4.588
5.332	6.735	NaN	NaN	2.077	1.836	51.173	84.628	NaN	NaN	NaN	NaN	6.672	4.468
6.589	8.389	NaN	NaN	8.719	10.4	50.074	82.34	NaN	NaN	NaN	NaN	6.76	4.526
5.498	6.961	NaN	NaN	8.002	9.456	18.798	31.894	NaN	NaN	NaN	NaN	6.629	4.439
5.895	7.477	NaN	NaN	7.719	9.102	17.424	29.742	NaN	NaN	NaN	NaN	3.879	3.074
6.328	8.036	NaN	NaN	8.291	9.803	18.359	31.07	NaN	NaN	NaN	NaN	3.791	3.008
1.83	2.057	NaN	NaN	8.063	9.557	8.607	13.24	NaN	NaN	NaN	NaN	3.848	3.052
1.746	1.947	NaN	NaN	1.502	1.517	5.163	7.815	NaN	NaN	NaN	NaN	3.885	3.078
1.562	1.711	NaN	NaN	1.392	1.383	7.198	10.952	NaN	NaN	NaN	NaN	10.979	7.286
1.631	1.792	NaN	NaN	1.388	1.378	5.756	9.574	NaN	NaN	NaN	NaN	10.879	7.23
1.729	1.922	NaN	NaN	1.414	1.414	6.261	10.455	NaN	NaN	NaN	NaN	11.073	7.348
3.3	4.194	NaN	NaN	1.39	1.385	6.297	10.542	NaN	NaN	NaN	NaN	11.292	7.475
3.217	4.091	NaN	NaN	1.079	0.905	2.495	3.87	NaN	NaN	NaN	NaN	11.215	7.434
3.121	3.961	NaN	NaN	1.207	1.007	2.454	3.808	NaN	NaN	NaN	NaN	0.275	0.217
3.199	4.062	NaN	NaN	1.093	0.917	2.458	3.819	NaN	NaN	NaN	NaN	0.283	0.222
3.353	4.276	NaN	NaN	1.218	1.009	2.447	3.659	NaN	NaN	NaN	NaN	0.286	0.224
3.169	4.028	NaN	NaN	1.285	1.066	2.451	3.681	NaN	NaN	NaN	NaN	0.424	0.313
16.209	22.462	NaN	NaN	2.08	1.779	2.362	3.48	NaN	NaN	NaN	NaN	0.428	0.317
16.311	22.605	NaN	NaN	1.964	1.655	42.761	77.116	NaN	NaN	NaN	NaN	2.536	1.969
16.874	23.41	NaN	NaN	1.905	1.594	50.855	91.2	NaN	NaN	NaN	NaN	2.674	2.073
16.274	22.554	NaN	NaN	1.993	1.689	48.644	87.256	NaN	NaN	NaN	NaN	2.619	2.032
16.144	22.364	NaN	NaN	2.037	1.764	41.005	73.695	NaN	NaN	NaN	NaN	2.631	2.04
12.791	17.291	NaN	NaN	3.282	3.341	48.586	87.185	NaN	NaN	NaN	NaN	2.646	2.052
14.496	19.599	NaN	NaN	3.282	3.341	45.654	81.601	NaN	NaN	NaN	NaN	3.283	2.333
13.217	17.856	NaN	NaN	3.205	3.26	52.705	94.577	NaN	NaN	NaN	NaN	3.343	2.372
13.37	18.071	NaN	NaN	3.653	3.755	52.384	94.109	NaN	NaN	NaN	NaN	3.401	2.41
12.777	17.265	NaN	NaN	3.274	3.33	48.04	86.392	NaN	NaN	NaN	NaN	3.358	2.382
13.512	18.245	NaN	NaN	2.891	2.81	39.012	70.437	NaN	NaN	NaN	NaN	3.222	2.296
12.993	18.14	NaN	NaN	3.004	2.98	9.941	17.071	NaN	NaN	NaN	NaN	1.743	1.219
10.843	15.11	NaN	NaN	2.922	2.86	10.094	17.342	NaN	NaN	NaN	NaN	1.726	1.208
13.398	18.706	NaN	NaN	8.877	10.668	8.163	13.919	NaN	NaN	NaN	NaN	1.743	1.218
14.197	19.821	NaN	NaN	17.18	21.459	6.889	11.647	NaN	NaN	NaN	NaN	1.688	1.183
12.858	17.948	NaN	NaN	21.034	33.22	6.977	11.81	NaN	NaN	NaN	NaN	2.055	1.658
11.576	16.155	NaN	NaN	32.374	38.986	8.433	14.397	NaN	NaN	NaN	NaN	2.04	1.644
2.866	3.075	NaN	NaN	11.249	13.279	5.602	6.067	NaN	NaN	NaN	NaN	5.017	3.544
2.779	2.953	NaN	NaN	20.301	26.112	4.141	3.871	NaN	NaN	NaN	NaN	4.865	3.44
2.886	3.113	NaN	NaN	15.206	19.156	3.7	3.369	NaN	NaN	NaN	NaN	1.322	0.994
1.5	1.383	NaN	NaN	5.471	6.208	13.491	22.59	NaN	NaN	NaN	NaN	1.419	1.064
12.164	16.022	NaN	NaN	5.241	5.925	13.375	22.385	NaN	NaN	NaN	NaN	1.095	0.767
12.12	15.936	NaN	NaN	5.297	6.007	9.276	14.976	NaN	NaN	NaN	NaN	1.094	0.74
12.097	15.9	NaN	NaN	27.952	37.579	14.294	23.983	NaN	NaN	NaN	NaN	0.827	0.627
12.099	15.908	NaN	NaN	13.953	19.778	11.992	19.928	NaN	NaN	NaN	NaN	0.855	0.649
11.675	15.26	NaN	NaN	3.818	4.581	15.092	25.515	NaN	NaN	NaN	NaN	2.361	1.8
12.302	16.259	NaN	NaN	12.85	15.183	7.013	10.838	NaN	NaN	NaN	NaN	2.366	1.803
3.475	4.488	NaN	NaN	25.693	31.258	16.551	28.143	NaN	NaN	NaN	NaN	0.42	0.342
3.484	4.5	NaN	NaN	19.646	26.083	14.46	24.319	NaN	NaN	NaN	NaN	0.422	0.343
3.573	4.621	NaN	NaN	19.184	25.385	5.76	9.029	NaN	NaN	NaN	NaN	0.389	0.317
3.417	4.413	NaN	NaN	18.536	24.514	6.451	10.223	NaN	NaN	NaN	NaN	0.773	0.608
3.318	4.278	NaN	NaN	17.906	23.385	5.94	9.361	NaN	NaN	NaN	NaN	0.847	0.663
8.491	12.021	NaN	NaN	20.217	26.975	6.328	10.009	NaN	NaN	NaN	NaN	0.605	0.457
8.748	12.336	NaN	NaN	20.202	26.982	6.2	9.796	NaN	NaN	NaN	NaN	0.604	0.457
8.938	12.578	NaN	NaN	19.258	25.255	6.373	10.09	NaN	NaN	NaN	NaN	1.881	1.384
15.376	19.658	NaN	NaN	19.699	26.082	6.069	9.57	NaN	NaN	NaN	NaN	1.844	1.358
14.367	18.376	NaN	NaN	16.347	21.224	6.86	11.109	NaN	NaN	NaN	NaN	0.831	0.703
16.197	20.712	NaN	NaN	28.119	36.576	1.079	1.371	NaN	NaN	NaN	NaN	0.63	0.55
13.745	17.595	NaN	NaN	32.591	42.402	3.462	5.831	NaN	NaN	NaN	NaN	0.68	0.591
6.491	9.025	NaN	NaN	35.864	46.695	2.696	4.376	NaN	NaN	NaN	NaN	0.638	0.583
6.113	8.492	NaN	NaN	30.084	39.123	2.269	3.582	NaN	NaN	NaN	NaN	0.689	0.623
5.525	7.658	NaN	NaN	27.291	35.542	2.974	4.906	NaN	NaN	NaN	NaN	0.496	0.422
4.627	6.273	NaN	NaN	20.468	26.509	2.647	4.274	NaN	NaN	NaN	NaN	0.494	0.419
4.655	6.3	NaN	NaN	33.632	43.775	2.076	3.228	NaN	NaN	NaN	NaN	0.734	0.578
3.049	3.341	NaN	NaN	21.022	27.254	4.547	7.888	NaN	NaN	NaN	NaN	0.701	0.552
3.027	3.316	NaN	NaN	38.696	50.4	3.432	5.774	NaN	NaN	NaN	NaN	0.644	0.501
3.042	3.33	NaN	NaN	4.741	5.741	4.7	5.697	NaN	NaN	NaN	NaN	0.661	0.514
2.967	3.417	NaN	NaN	16.844	23.586	4.365	5.281	NaN	NaN	NaN	NaN	0.377	0.322
2.825	3.195	NaN	NaN	15.686	21.749	4.871	6.163	NaN	NaN	NaN	NaN	0.378	0.323
2.994	3.471	NaN	NaN	16.88	23.623	5.185	6.636	NaN	NaN	NaN	NaN	0.31	0.287
2.307	3.084	NaN	NaN	16.912	23.481	3.094	4.623	NaN	NaN	NaN	NaN	0.314	0.29
2.25	2.992	NaN	NaN	18.568	25.885	3.163	4.747	NaN	NaN	NaN	NaN	0.098	0.096
1.978	2.196	NaN	NaN	18.277	25.558	3.099	4.636	NaN	NaN	NaN	NaN	0.098	0.096
2.17	2.4	NaN	NaN	17.95	25.072	1.696	2.295	NaN	NaN	NaN	NaN	0.128	0.12
2.299	2.535	NaN	NaN	19.036	26.511	1.735	2.346	NaN	NaN	NaN	NaN	0.127	0.12
2.396	3.05	NaN	NaN	17.115	23.747	1.64	2.204	NaN	NaN	NaN	NaN	0.146	0.14
2.295	2.913	NaN	NaN	19.379	27.095	1.732	2.35	NaN	NaN	NaN	NaN	0.142	0.137
1.194	1.156	NaN	NaN	9.034	12.232	4.07	5.549	NaN	NaN	NaN	NaN	0.397	0.326
1.204	1.165	NaN	NaN	7.809	10.489	4.106	5.603	NaN	NaN	NaN	NaN	0.4	0.328
1.129	1.1	NaN	NaN	9.378	12.725	4.019	5.474	NaN	NaN	NaN	NaN	0.098	0.097
1.469	1.718	NaN	NaN	6.789	9.033	9.551	15.743	NaN	NaN	NaN	NaN	0.099	0.098
1.473	1.722	NaN	NaN	11.985	16.434	9.515	15.672	NaN	NaN	NaN	NaN	0.107	0.104
2.195	2.34	NaN	NaN	8.29	11.263	9.652	15.903	NaN	NaN	NaN	NaN	0.107	0.104
2.22	2.368	NaN	NaN	10.738	14.759	4.99	7.591	NaN	NaN	NaN	NaN	3.972	2.852
2.244	2.393	NaN	NaN	9.243	12.67	4.999	7.612	NaN	NaN	NaN	NaN	10.03	6.98
0.773	0.86	NaN	NaN	8.622	11.747	4.748	7.081	NaN	NaN	NaN	NaN	1.1	0.768
0.773	0.859	NaN	NaN	9.168	12.528	6.081	10.404	NaN	NaN	NaN	NaN	0.996	0.752
16.933	23.496	NaN	NaN	7.256	9.826	6.07	10.351	NaN	NaN	NaN	NaN	0.93	0.704
15.148	17.808	NaN	NaN	13.412	18.518	3.989	6.392	NaN	NaN	NaN	NaN	15.033	9.993
17.074	19.902	NaN	NaN	3.309	4.148	5.359	8.998	NaN	NaN	NaN	NaN	3.731	2.968
24.356	29.241	NaN	NaN	35.133	45.108	6.081	10.803	NaN	NaN	NaN	NaN	3.817	3.031
30.451	41.687	NaN	NaN	35.749	45.905	6.04	10.089	NaN	NaN	NaN	NaN	12.576	8.445
8.795	12.415	NaN	NaN	35.363	45.413	1.909	2.614	NaN	NaN	NaN	NaN	13.416	8.902
13.661	17.463	NaN	NaN	34.177	43.902	2.503	3.517	NaN	NaN	NaN	NaN	9.082	6.261
4.657	6.3	NaN	NaN	33.629	43.207	1.821	2.483	NaN	NaN	NaN	NaN	16.747	10.626
23.332	31.051	NaN	NaN	35.671	45.809	1.669	2.261	NaN	NaN	NaN	NaN	16.582	10.528
24.452	29.373	NaN	NaN	35.642	45.777	2.105	2.916	NaN	NaN	NaN	NaN	0.573	0.505
3.286	4.184	NaN	NaN	32.509	48.379	3.481	5.751	NaN	NaN	NaN	NaN	0.484	0.36
12.484	16.875	NaN	NaN	31.299	45.391	3.32	5.23	NaN	NaN	NaN	NaN	1.745	1.221
24.465	29.679	NaN	NaN	31.815	46.304	3.474	5.706	NaN	NaN	NaN	NaN	1.74	1.217
2.288	2.903	NaN	NaN	32.219	47.025	3.154	4.704	NaN	NaN	NaN	NaN	1.737	1.215
1.222	1.18	NaN	NaN	30.561	44.235	3.751	6.508	NaN	NaN	NaN	NaN	1.7	1.191
20.561	24.532	NaN	NaN	22.306	31.192	2.746	3.65	NaN	NaN	NaN	NaN	0.398	0.326
1.519	1.398	NaN	NaN	22.556	31.759	5.876	11.032	NaN	NaN	NaN	NaN	13.253	8.91
2.294	3.037	NaN	NaN	22.439	31.395	5.808	10.87	NaN	NaN	NaN	NaN	9.059	6.363
2.495	3.142	NaN	NaN	22.098	30.955	5.797	10.846	NaN	NaN	NaN	NaN	19.741	13.104
11.867	16.204	NaN	NaN	11.348	14.815	5.813	10.883	NaN	NaN	NaN	NaN	19.769	13.098
NaN	NaN	NaN	NaN	11.541	15.05	5.282	9.627	NaN	NaN	NaN	NaN	2.731	1.96
NaN	NaN	NaN	NaN	12.124	15.76	5.097	7.892	NaN	NaN	NaN	NaN	0.309	0.285
NaN	NaN	NaN	NaN	11.236	14.659	5.282	8.233	NaN	NaN	NaN	NaN	3.83	3.041
NaN	NaN	NaN	NaN	23.104	30.524	5.349	8.357	NaN	NaN	NaN	NaN	3.815	3.025
NaN	NaN	NaN	NaN	22.971	30.384	3.737	5.532	NaN	NaN	NaN	NaN	6.551	4.668
NaN	NaN	NaN	NaN	23.057	30.459	3.897	5.773	NaN	NaN	NaN	NaN	6.128	4.395
NaN	NaN	NaN	NaN	23.693	31.143	3.816	5.642	NaN	NaN	NaN	NaN	6.511	4.641
NaN	NaN	NaN	NaN	21.375	27.449	1.144	1.379	NaN	NaN	NaN	NaN	6.232	4.462
NaN	NaN	NaN	NaN	20.46	26.245	1.127	1.343	NaN	NaN	NaN	NaN	6.391	4.578
NaN	NaN	NaN	NaN	20.628	26.472	1.129	1.321	NaN	NaN	NaN	NaN	5.859	4.21
NaN	NaN	NaN	NaN	20.153	25.842	4.542	4.998	NaN	NaN	NaN	NaN	6.032	4.325
NaN	NaN	NaN	NaN	5.351	6.429	4.481	4.822	NaN	NaN	NaN	NaN	5.173	3.74
NaN	NaN	NaN	NaN	5.482	6.596	5.25	5.543	NaN	NaN	NaN	NaN	6.155	4.416
NaN	NaN	NaN	NaN	5.545	6.669	4.549	7.062	NaN	NaN	NaN	NaN	6.069	4.353
NaN	NaN	NaN	NaN	5.455	6.565	4.151	6.617	NaN	NaN	NaN	NaN	5.887	4.23
NaN	NaN	NaN	NaN	5.26	6.312	4.328	6.81	NaN	NaN	NaN	NaN	6.262	4.482
NaN	NaN	NaN	NaN	5.557	6.643	4.031	6.55	NaN	NaN	NaN	NaN	5.874	4.222
NaN	NaN	NaN	NaN	5.547	6.631	5.003	7.961	NaN	NaN	NaN	NaN	6.274	4.491
NaN	NaN	NaN	NaN	5.461	6.524	5.03	8.034	NaN	NaN	NaN	NaN	6.406	4.577
NaN	NaN	NaN	NaN	5.137	6.458	5.019	7.99	NaN	NaN	NaN	NaN	5.309	3.836
NaN	NaN	NaN	NaN	4.465	5.544	37.524	65.788	NaN	NaN	NaN	NaN	5.201	3.761
NaN	NaN	NaN	NaN	4.335	5.375	38.776	68.018	NaN	NaN	NaN	NaN	16.022	10.91
NaN	NaN	NaN	NaN	3.54	4.32	36.213	63.345	NaN	NaN	NaN	NaN	19.293	13.015
NaN	NaN	NaN	NaN	5.128	6.418	38.577	67.521	NaN	NaN	NaN	NaN	21.391	14.445
NaN	NaN	NaN	NaN	4.183	5.213	64.463	116.557	NaN	NaN	NaN	NaN	20.458	13.801
NaN	NaN	NaN	NaN	3.05	3.599	63.807	114.823	NaN	NaN	NaN	NaN	18.33	12.42
NaN	NaN	NaN	NaN	3.038	3.592	66.245	119.468	NaN	NaN	NaN	NaN	19.699	13.353
NaN	NaN	NaN	NaN	3.085	3.639	65.344	118.027	NaN	NaN	NaN	NaN	19.388	13.131
NaN	NaN	NaN	NaN	3.084	3.637	58.013	104.376	NaN	NaN	NaN	NaN	3.891	2.793
NaN	NaN	NaN	NaN	3.018	3.53	13.437	16.407	NaN	NaN	NaN	NaN	1.234	0.893
NaN	NaN	NaN	NaN	1.326	1.488	13.522	16.356	NaN	NaN	NaN	NaN	1.108	0.803
NaN	NaN	NaN	NaN	1.323	1.483	13.512	16.26	NaN	NaN	NaN	NaN	1.265	0.916
NaN	NaN	NaN	NaN	1.294	1.448	13.356	16.486	NaN	NaN	NaN	NaN	1.278	0.925
NaN	NaN	NaN	NaN	1.175	1.305	12.98	15.939	NaN	NaN	NaN	NaN	0.81	0.589
NaN	NaN	NaN	NaN	11.985	16.724	13.426	16.425	NaN	NaN	NaN	NaN	0.924	0.671
NaN	NaN	NaN	NaN	13.535	17.856	12.924	15.528	NaN	NaN	NaN	NaN	1.231	0.891
NaN	NaN	NaN	NaN	13.627	17.991	13.091	16.34	NaN	NaN	NaN	NaN	1.11	0.805
NaN	NaN	NaN	NaN	13.654	18.042	5.624	10.271	NaN	NaN	NaN	NaN	1.038	0.753
NaN	NaN	NaN	NaN	13.672	18.07	5.59	10.234	NaN	NaN	NaN	NaN	3.399	2.425
NaN	NaN	NaN	NaN	14.338	20.504	5.188	8.248	NaN	NaN	NaN	NaN	3.101	2.228
NaN	NaN	NaN	NaN	14.326	20.495	5.188	8.248	NaN	NaN	NaN	NaN	2.455	1.764
NaN	NaN	NaN	NaN	14.241	20.311	1.246	1.706	NaN	NaN	NaN	NaN	4.105	2.905
NaN	NaN	NaN	NaN	14.504	20.718	2.017	3.109	NaN	NaN	NaN	NaN	3.576	2.544
NaN	NaN	NaN	NaN	30.083	42.267	1.457	2	NaN	NaN	NaN	NaN	3.616	2.569
NaN	NaN	NaN	NaN	25.501	36.206	1.381	1.862	NaN	NaN	NaN	NaN	3.051	2.178
NaN	NaN	NaN	NaN	24.583	34.829	4.471	7.99	NaN	NaN	NaN	NaN	0.19	0.167
NaN	NaN	NaN	NaN	14.376	19.246	4.534	8.131	NaN	NaN	NaN	NaN	0.196	0.171
NaN	NaN	NaN	NaN	13.406	18.073	1.88	2.607	NaN	NaN	NaN	NaN	0.192	0.168
NaN	NaN	NaN	NaN	14.09	18.757	2.151	3.074	NaN	NaN	NaN	NaN	0.188	0.165
NaN	NaN	NaN	NaN	14.018	18.85	2.846	4.22	NaN	NaN	NaN	NaN	0.189	0.165
NaN	NaN	NaN	NaN	26.435	41.141	2.838	4.205	NaN	NaN	NaN	NaN	0.188	0.165
NaN	NaN	NaN	NaN	26.07	40.517	2.701	4.286	NaN	NaN	NaN	NaN	0.659	0.48
NaN	NaN	NaN	NaN	26.942	42.052	2.573	4.022	NaN	NaN	NaN	NaN	0.89	0.675
NaN	NaN	NaN	NaN	27.17	42.459	5.469	9.898	NaN	NaN	NaN	NaN	0.828	0.63
NaN	NaN	NaN	NaN	18.577	25.812	5.2	9.323	NaN	NaN	NaN	NaN	0.642	0.496
NaN	NaN	NaN	NaN	18.924	26.242	5.865	9.756	NaN	NaN	NaN	NaN	9.282	6.444
NaN	NaN	NaN	NaN	19.079	26.366	5.897	9.813	NaN	NaN	NaN	NaN	9.021	6.272
NaN	NaN	NaN	NaN	17.081	23.358	5.361	5.335	NaN	NaN	NaN	NaN	7.565	5.307
NaN	NaN	NaN	NaN	17.394	23.771	4.768	4.876	NaN	NaN	NaN	NaN	7.963	5.567
NaN	NaN	NaN	NaN	17.425	23.815	3.329	3.77	NaN	NaN	NaN	NaN	10.129	6.857
NaN	NaN	NaN	NaN	17.235	23.559	3.153	3.605	NaN	NaN	NaN	NaN	9.829	6.697
NaN	NaN	NaN	NaN	18.664	24.329	1.454	1.924	NaN	NaN	NaN	NaN	9.912	6.736
NaN	NaN	NaN	NaN	19.285	25.082	1.423	1.876	NaN	NaN	NaN	NaN	9.895	6.745
NaN	NaN	NaN	NaN	18.639	24.292	56.852	94.064	NaN	NaN	NaN	NaN	9.214	6.32
NaN	NaN	NaN	NaN	19.386	25.216	56.96	94.249	NaN	NaN	NaN	NaN	10.358	7.023
NaN	NaN	NaN	NaN	18.587	24.244	55.635	91.922	NaN	NaN	NaN	NaN	2.146	1.544
NaN	NaN	NaN	NaN	23.155	38.297	39.244	63.303	NaN	NaN	NaN	NaN	2.179	1.568
NaN	NaN	NaN	NaN	23.246	38.449	37.375	60.335	NaN	NaN	NaN	NaN	2.172	1.563
NaN	NaN	NaN	NaN	22.304	36.864	50.753	80.454	NaN	NaN	NaN	NaN	2.032	1.466
NaN	NaN	NaN	NaN	22.038	36.419	53.045	84.054	NaN	NaN	NaN	NaN	8.352	5.861
NaN	NaN	NaN	NaN	12.91	17.442	51.536	81.765	NaN	NaN	NaN	NaN	8.215	5.763
NaN	NaN	NaN	NaN	13.008	17.578	69.944	104.059	NaN	NaN	NaN	NaN	7.925	5.558
NaN	NaN	NaN	NaN	12.901	17.424	69.355	103.429	NaN	NaN	NaN	NaN	8.117	5.691
NaN	NaN	NaN	NaN	2.933	3.471	30.267	48.481	NaN	NaN	NaN	NaN	12.906	8.38
NaN	NaN	NaN	NaN	2.75	3.262	30.037	48.152	NaN	NaN	NaN	NaN	13.077	8.455
NaN	NaN	NaN	NaN	2.902	3.432	72.305	109.4	NaN	NaN	NaN	NaN	12.894	8.376
NaN	NaN	NaN	NaN	3.229	3.827	73.875	110.839	NaN	NaN	NaN	NaN	12.835	8.341
NaN	NaN	NaN	NaN	2.977	3.521	75.584	107.77	NaN	NaN	NaN	NaN	8.275	5.839
NaN	NaN	NaN	NaN	11.73	14.421	76.635	108.023	NaN	NaN	NaN	NaN	7.805	5.531
NaN	NaN	NaN	NaN	12.334	15.099	74.302	107.361	NaN	NaN	NaN	NaN	8.179	5.776
NaN	NaN	NaN	NaN	11.898	14.541	47.584	73.496	NaN	NaN	NaN	NaN	7.791	5.52
NaN	NaN	NaN	NaN	11.467	14.072	46.296	71.236	NaN	NaN	NaN	NaN	24.175	15.975
NaN	NaN	NaN	NaN	15.126	18.755	68.341	94.96	NaN	NaN	NaN	NaN	23.732	15.671
NaN	NaN	NaN	NaN	15.309	19.008	67.367	93.171	NaN	NaN	NaN	NaN	23.664	15.633
NaN	NaN	NaN	NaN	15.848	19.775	34.964	53.917	NaN	NaN	NaN	NaN	23.033	15.186
NaN	NaN	NaN	NaN	15.47	19.249	21.832	37.053	NaN	NaN	NaN	NaN	23.342	15.389
NaN	NaN	NaN	NaN	5.724	7.086	22.684	37.403	NaN	NaN	NaN	NaN	23.77	15.713
NaN	NaN	NaN	NaN	4.959	6.077	23.618	38.843	NaN	NaN	NaN	NaN	1.951	1.446
NaN	NaN	NaN	NaN	7.724	9.732	4.421	7.36	NaN	NaN	NaN	NaN	1.945	1.443
NaN	NaN	NaN	NaN	5.874	7.001	4.149	6.847	NaN	NaN	NaN	NaN	2.022	1.494
NaN	NaN	NaN	NaN	5.714	6.803	6.174	10.22	NaN	NaN	NaN	NaN	1.95	1.445
NaN	NaN	NaN	NaN	5.957	7.102	5.803	9.6	NaN	NaN	NaN	NaN	1.985	1.472
NaN	NaN	NaN	NaN	5.846	6.967	6.228	10.767	NaN	NaN	NaN	NaN	4.156	2.84
NaN	NaN	NaN	NaN	17.939	23.576	5.634	9.69	NaN	NaN	NaN	NaN	4.403	3.006
NaN	NaN	NaN	NaN	19.706	25.889	8.044	14.087	NaN	NaN	NaN	NaN	6.484	4.778
NaN	NaN	NaN	NaN	7.014	8.78	6.74	11.769	NaN	NaN	NaN	NaN	6.983	5.137
NaN	NaN	NaN	NaN	6.886	8.602	3.42	3.027	NaN	NaN	NaN	NaN	7.224	5.3
NaN	NaN	NaN	NaN	1.875	2.177	2.984	2.545	NaN	NaN	NaN	NaN	6.873	5.048
NaN	NaN	NaN	NaN	1.881	2.185	2.882	2.404	NaN	NaN	NaN	NaN	26.85	17.651
NaN	NaN	NaN	NaN	2.019	2.346	8.052	13.208	NaN	NaN	NaN	NaN	26.294	17.251
NaN	NaN	NaN	NaN	2.037	2.368	7.878	12.885	NaN	NaN	NaN	NaN	27.58	18.164
NaN	NaN	NaN	NaN	7.478	9.132	7.89	12.894	NaN	NaN	NaN	NaN	23.529	15.337
NaN	NaN	NaN	NaN	7.199	8.767	9.159	15.221	NaN	NaN	NaN	NaN	16.525	10.849
NaN	NaN	NaN	NaN	7.366	8.993	7.481	12.165	NaN	NaN	NaN	NaN	16.758	11.011
NaN	NaN	NaN	NaN	0.804	0.812	8.35	13.725	NaN	NaN	NaN	NaN	16.621	10.917
NaN	NaN	NaN	NaN	0.817	0.823	12.832	21.379	NaN	NaN	NaN	NaN	16.473	10.815
NaN	NaN	NaN	NaN	1.686	1.947	9.96	16.422	NaN	NaN	NaN	NaN	15.206	9.743
NaN	NaN	NaN	NaN	1.841	2.143	12.888	21.445	NaN	NaN	NaN	NaN	16.901	10.808
NaN	NaN	NaN	NaN	1.848	2.15	13.899	23.27	NaN	NaN	NaN	NaN	16.52	10.579
NaN	NaN	NaN	NaN	1.849	2.151	13.187	22.051	NaN	NaN	NaN	NaN	16.459	10.536
NaN	NaN	NaN	NaN	1.844	2.145	13.854	23.302	NaN	NaN	NaN	NaN	26.536	17.176
NaN	NaN	NaN	NaN	1.837	2.136	2.465	3.605	NaN	NaN	NaN	NaN	25.999	16.984
NaN	NaN	NaN	NaN	1.06	1.181	2.621	3.903	NaN	NaN	NaN	NaN	25.92	16.871
NaN	NaN	NaN	NaN	1.008	1.115	2.537	3.744	NaN	NaN	NaN	NaN	25.555	16.615
NaN	NaN	NaN	NaN	1.029	1.142	14.862	24.536	NaN	NaN	NaN	NaN	9.688	6.571
NaN	NaN	NaN	NaN	0.963	1.058	14.337	23.515	NaN	NaN	NaN	NaN	8.687	5.944
NaN	NaN	NaN	NaN	0.947	1.038	14.441	23.855	NaN	NaN	NaN	NaN	8.808	6.02
NaN	NaN	NaN	NaN	4.207	5.296	12.504	20.085	NaN	NaN	NaN	NaN	8.999	6.139
NaN	NaN	NaN	NaN	4.035	5.048	14.953	24.512	NaN	NaN	NaN	NaN	8.625	5.905
NaN	NaN	NaN	NaN	3.985	4.99	15.768	26.228	NaN	NaN	NaN	NaN	3.145	2.371
NaN	NaN	NaN	NaN	4.053	5.054	9.485	12.523	NaN	NaN	NaN	NaN	3.09	2.328
NaN	NaN	NaN	NaN	4.106	5.159	9.3	12.732	NaN	NaN	NaN	NaN	3.162	2.378
NaN	NaN	NaN	NaN	1.65	1.853	9.362	12.955	NaN	NaN	NaN	NaN	3.108	2.339
NaN	NaN	NaN	NaN	1.578	1.764	9.089	12.7	NaN	NaN	NaN	NaN	3.255	2.441
NaN	NaN	NaN	NaN	1.575	1.761	5.169	8.152	NaN	NaN	NaN	NaN	4.75	3.279
NaN	NaN	NaN	NaN	1.624	1.817	5.217	8.223	NaN	NaN	NaN	NaN	4.485	3.107
NaN	NaN	NaN	NaN	1.608	1.798	5.397	7.662	NaN	NaN	NaN	NaN	4.51	3.124
NaN	NaN	NaN	NaN	0.747	0.713	70.769	109.882	NaN	NaN	NaN	NaN	4.409	3.059
NaN	NaN	NaN	NaN	0.802	0.783	75.865	117.472	NaN	NaN	NaN	NaN	6.266	4.455
NaN	NaN	NaN	NaN	0.755	0.724	72.245	112.083	NaN	NaN	NaN	NaN	6.292	4.472
NaN	NaN	NaN	NaN	0.792	0.771	9.668	16.312	NaN	NaN	NaN	NaN	6.236	4.436
NaN	NaN	NaN	NaN	0.812	0.801	9.544	16.075	NaN	NaN	NaN	NaN	6.258	4.45
NaN	NaN	NaN	NaN	0.786	0.746	2.962	4.501	NaN	NaN	NaN	NaN	19.359	12.593
NaN	NaN	NaN	NaN	0.766	0.725	3.049	4.647	NaN	NaN	NaN	NaN	19.495	12.708
NaN	NaN	NaN	NaN	0.758	0.718	3.014	4.587	NaN	NaN	NaN	NaN	19.887	12.933
NaN	NaN	NaN	NaN	0.774	0.736	22.905	42.068	NaN	NaN	NaN	NaN	19.808	12.829
NaN	NaN	NaN	NaN	0.781	0.756	23.148	42.547	NaN	NaN	NaN	NaN	20.044	13.008
NaN	NaN	NaN	NaN	1.805	2.106	24.031	44.203	NaN	NaN	NaN	NaN	0.248	0.216
NaN	NaN	NaN	NaN	1.805	2.106	24.569	45.206	NaN	NaN	NaN	NaN	0.239	0.208
NaN	NaN	NaN	NaN	1.779	2.076	3.103	4.808	NaN	NaN	NaN	NaN	0.236	0.205
NaN	NaN	NaN	NaN	1.978	2.317	3.088	4.782	NaN	NaN	NaN	NaN	0.634	0.515
NaN	NaN	NaN	NaN	1.798	2.096	9.972	14.672	NaN	NaN	NaN	NaN	0.631	0.512
NaN	NaN	NaN	NaN	1.029	1.045	10.036	14.879	NaN	NaN	NaN	NaN	2.337	1.708
NaN	NaN	NaN	NaN	1.086	1.123	10.006	14.806	NaN	NaN	NaN	NaN	2.129	1.552
NaN	NaN	NaN	NaN	1.044	1.067	10.214	16.315	NaN	NaN	NaN	NaN	2.148	1.568
NaN	NaN	NaN	NaN	7.008	8.772	10.537	16.859	NaN	NaN	NaN	NaN	2.145	1.566
NaN	NaN	NaN	NaN	5.837	6.956	10.471	16.745	NaN	NaN	NaN	NaN	2.136	1.558
NaN	NaN	NaN	NaN	26.23	40.797	6.068	9.699	NaN	NaN	NaN	NaN	4.787	3.315
NaN	NaN	NaN	NaN	35.225	45.237	5.829	9.242	NaN	NaN	NaN	NaN	4.702	3.259
NaN	NaN	NaN	NaN	21.125	27.121	6.103	9.801	NaN	NaN	NaN	NaN	4.636	3.214
NaN	NaN	NaN	NaN	11.203	15.015	5.045	7.687	NaN	NaN	NaN	NaN	4.671	3.238
NaN	NaN	NaN	NaN	18.991	26.322	6.136	9.815	NaN	NaN	NaN	NaN	4.053	2.824
NaN	NaN	NaN	NaN	3.039	3.586	0.604	0.629	NaN	NaN	NaN	NaN	1.053	0.779
NaN	NaN	NaN	NaN	3.054	3.608	0.629	0.664	NaN	NaN	NaN	NaN	1.056	0.783
NaN	NaN	NaN	NaN	3.11	3.665	0.598	0.622	NaN	NaN	NaN	NaN	1.054	0.781
NaN	NaN	NaN	NaN	32.21	47.007	0.721	0.782	NaN	NaN	NaN	NaN	1.059	0.787
NaN	NaN	NaN	NaN	22.256	31.058	1.614	1.897	NaN	NaN	NaN	NaN	0.809	0.72
NaN	NaN	NaN	NaN	2.685	3.183	1.705	2.06	NaN	NaN	NaN	NaN	0.801	0.712
NaN	NaN	NaN	NaN	21.752	28.214	1.717	2.078	NaN	NaN	NaN	NaN	3.645	2.511
NaN	NaN	NaN	NaN	11.695	15.245	1.715	2.079	NaN	NaN	NaN	NaN	3.564	2.46
NaN	NaN	NaN	NaN	NaN	NaN	0.885	0.965	NaN	NaN	NaN	NaN	0.67	0.521
NaN	NaN	NaN	NaN	NaN	NaN	0.89	0.964	NaN	NaN	NaN	NaN	0.698	0.541
NaN	NaN	NaN	NaN	NaN	NaN	0.898	0.951	NaN	NaN	NaN	NaN	0.599	0.45
NaN	NaN	NaN	NaN	NaN	NaN	0.894	0.926	NaN	NaN	NaN	NaN	0.586	0.428
NaN	NaN	NaN	NaN	NaN	NaN	4.26	6.75	NaN	NaN	NaN	NaN	0.578	0.447
NaN	NaN	NaN	NaN	NaN	NaN	4.334	6.898	NaN	NaN	NaN	NaN	0.587	0.453
NaN	NaN	NaN	NaN	NaN	NaN	4.361	6.952	NaN	NaN	NaN	NaN	2.79	1.946
NaN	NaN	NaN	NaN	NaN	NaN	6.186	9.69	NaN	NaN	NaN	NaN	2.821	1.966
NaN	NaN	NaN	NaN	NaN	NaN	6.912	11.12	NaN	NaN	NaN	NaN	1.103	0.854
NaN	NaN	NaN	NaN	NaN	NaN	7.059	11.422	NaN	NaN	NaN	NaN	1.22	0.941
NaN	NaN	NaN	NaN	NaN	NaN	7.201	11.707	NaN	NaN	NaN	NaN	1.173	0.91
NaN	NaN	NaN	NaN	NaN	NaN	6.857	11.032	NaN	NaN	NaN	NaN	0.736	0.577
NaN	NaN	NaN	NaN	NaN	NaN	12.187	15.713	NaN	NaN	NaN	NaN	0.784	0.613
NaN	NaN	NaN	NaN	NaN	NaN	21.883	27.707	NaN	NaN	NaN	NaN	0.457	0.358
NaN	NaN	NaN	NaN	NaN	NaN	21.094	26.732	NaN	NaN	NaN	NaN	0.46	0.36
NaN	NaN	NaN	NaN	NaN	NaN	20.678	26.236	NaN	NaN	NaN	NaN	0.475	0.366
NaN	NaN	NaN	NaN	NaN	NaN	20.24	25.685	NaN	NaN	NaN	NaN	0.472	0.363
NaN	NaN	NaN	NaN	NaN	NaN	14.255	20.682	NaN	NaN	NaN	NaN	0.955	0.763
NaN	NaN	NaN	NaN	NaN	NaN	14.127	20.358	NaN	NaN	NaN	NaN	0.756	0.627
NaN	NaN	NaN	NaN	NaN	NaN	14.387	20.545	NaN	NaN	NaN	NaN	0.784	0.644
NaN	NaN	NaN	NaN	NaN	NaN	14.519	20.692	NaN	NaN	NaN	NaN	0.549	0.449
NaN	NaN	NaN	NaN	NaN	NaN	14.589	20.735	NaN	NaN	NaN	NaN	0.555	0.452
NaN	NaN	NaN	NaN	NaN	NaN	8.319	14.172	NaN	NaN	NaN	NaN	0.489	0.398
NaN	NaN	NaN	NaN	NaN	NaN	9.752	16.948	NaN	NaN	NaN	NaN	0.496	0.403
NaN	NaN	NaN	NaN	NaN	NaN	9.364	16.23	NaN	NaN	NaN	NaN	1.781	1.328
NaN	NaN	NaN	NaN	NaN	NaN	9.197	15.92	NaN	NaN	NaN	NaN	1.65	1.231
NaN	NaN	NaN	NaN	NaN	NaN	8.739	15.051	NaN	NaN	NaN	NaN	0.372	0.324
NaN	NaN	NaN	NaN	NaN	NaN	3.782	2.949	NaN	NaN	NaN	NaN	0.381	0.331
NaN	NaN	NaN	NaN	NaN	NaN	3.767	2.849	NaN	NaN	NaN	NaN	0.215	0.179
NaN	NaN	NaN	NaN	NaN	NaN	3.752	2.786	NaN	NaN	NaN	NaN	0.215	0.179
NaN	NaN	NaN	NaN	NaN	NaN	3.727	2.718	NaN	NaN	NaN	NaN	0.332	0.307
NaN	NaN	NaN	NaN	NaN	NaN	3.711	2.725	NaN	NaN	NaN	NaN	0.325	0.301
NaN	NaN	NaN	NaN	NaN	NaN	6.209	8.262	NaN	NaN	NaN	NaN	0.199	0.19
NaN	NaN	NaN	NaN	NaN	NaN	6.295	8.387	NaN	NaN	NaN	NaN	0.199	0.19
NaN	NaN	NaN	NaN	NaN	NaN	6.38	8.543	NaN	NaN	NaN	NaN	0.138	0.127
NaN	NaN	NaN	NaN	NaN	NaN	6.313	8.456	NaN	NaN	NaN	NaN	0.138	0.127
NaN	NaN	NaN	NaN	NaN	NaN	13.992	18.419	NaN	NaN	NaN	NaN	0.165	0.162
NaN	NaN	NaN	NaN	NaN	NaN	13.788	18.225	NaN	NaN	NaN	NaN	0.164	0.161
NaN	NaN	NaN	NaN	NaN	NaN	13.818	18.33	NaN	NaN	NaN	NaN	0.406	0.331
NaN	NaN	NaN	NaN	NaN	NaN	13.892	18.369	NaN	NaN	NaN	NaN	0.419	0.342
NaN	NaN	NaN	NaN	NaN	NaN	13.659	18.068	NaN	NaN	NaN	NaN	0.186	0.186
NaN	NaN	NaN	NaN	NaN	NaN	12.266	21.516	NaN	NaN	NaN	NaN	0.187	0.187
NaN	NaN	NaN	NaN	NaN	NaN	8.563	14.889	NaN	NaN	NaN	NaN	0.256	0.243
NaN	NaN	NaN	NaN	NaN	NaN	8.072	14.018	NaN	NaN	NaN	NaN	0.254	0.242
NaN	NaN	NaN	NaN	NaN	NaN	8.942	15.561	NaN	NaN	NaN	NaN	2.13	1.534
NaN	NaN	NaN	NaN	NaN	NaN	8.378	14.547	NaN	NaN	NaN	NaN	19.636	13.312
NaN	NaN	NaN	NaN	NaN	NaN	4.392	6.949	NaN	NaN	NaN	NaN	0.626	0.467
NaN	NaN	NaN	NaN	NaN	NaN	4.495	7.171	NaN	NaN	NaN	NaN	0.853	0.648
NaN	NaN	NaN	NaN	NaN	NaN	4.617	7.423	NaN	NaN	NaN	NaN	0.764	0.584
NaN	NaN	NaN	NaN	NaN	NaN	4.733	7.664	NaN	NaN	NaN	NaN	9.067	6.182
NaN	NaN	NaN	NaN	NaN	NaN	4	3.71	NaN	NaN	NaN	NaN	6.172	4.395
NaN	NaN	NaN	NaN	NaN	NaN	102.606	158.144	NaN	NaN	NaN	NaN	6.198	4.411
NaN	NaN	NaN	NaN	NaN	NaN	101.254	151.509	NaN	NaN	NaN	NaN	5.992	4.302
NaN	NaN	NaN	NaN	NaN	NaN	25.798	42.654	NaN	NaN	NaN	NaN	6.193	4.441
NaN	NaN	NaN	NaN	NaN	NaN	49.494	81.378	NaN	NaN	NaN	NaN	5.24	3.788
NaN	NaN	NaN	NaN	NaN	NaN	37.365	65.002	NaN	NaN	NaN	NaN	12.936	8.383
NaN	NaN	NaN	NaN	NaN	NaN	13.597	22.698	NaN	NaN	NaN	NaN	12.913	8.387
NaN	NaN	NaN	NaN	NaN	NaN	9.968	16.884	NaN	NaN	NaN	NaN	0.723	0.607
NaN	NaN	NaN	NaN	NaN	NaN	5.803	10.858	NaN	NaN	NaN	NaN	0.6	0.487
NaN	NaN	NaN	NaN	NaN	NaN	5.805	10.863	NaN	NaN	NaN	NaN	1.052	0.779
NaN	NaN	NaN	NaN	NaN	NaN	9.417	15.509	NaN	NaN	NaN	NaN	1.054	0.781
NaN	NaN	NaN	NaN	NaN	NaN	42.775	71.624	NaN	NaN	NaN	NaN	1.054	0.781
NaN	NaN	NaN	NaN	NaN	NaN	10.027	14.869	NaN	NaN	NaN	NaN	1.059	0.786
NaN	NaN	NaN	NaN	NaN	NaN	3.356	2.952	NaN	NaN	NaN	NaN	0.412	0.336
NaN	NaN	NaN	NaN	NaN	NaN	23.426	39.149	NaN	NaN	NaN	NaN	6.075	4.357
NaN	NaN	NaN	NaN	NaN	NaN	5.805	9.663	NaN	NaN	NaN	NaN	22.893	15.338
NaN	NaN	NaN	NaN	NaN	NaN	1.434	1.993	NaN	NaN	NaN	NaN	26.12	17.017
NaN	NaN	NaN	NaN	NaN	NaN	88.465	129.835	NaN	NaN	NaN	NaN	25.396	16.496
NaN	NaN	NaN	NaN	NaN	NaN	0.83	1.028	NaN	NaN	NaN	NaN	3.404	2.429
NaN	NaN	NaN	NaN	NaN	NaN	76.347	107.033	NaN	NaN	NaN	NaN	0.335	0.31
NaN	NaN	NaN	NaN	NaN	NaN	74.971	105.991	NaN	NaN	NaN	NaN	6.19	4.406
NaN	NaN	NaN	NaN	NaN	NaN	2.431	3.075	NaN	NaN	NaN	NaN	6.299	4.477
NaN	NaN	NaN	NaN	NaN	NaN	2.47	3.543	NaN	NaN	NaN	NaN	NaN	NaN
NaN	NaN	NaN	NaN	NaN	NaN	2.132	3.002	NaN	NaN	NaN	NaN	NaN	NaN
NaN	NaN	NaN	NaN	NaN	NaN	0.805	0.976	NaN	NaN	NaN	NaN	NaN	NaN
NaN	NaN	NaN	NaN	NaN	NaN	0.897	1.142	NaN	NaN	NaN	NaN	NaN	NaN
NaN	NaN	NaN	NaN	NaN	NaN	75.245	105.795	NaN	NaN	NaN	NaN	NaN	NaN
NaN	NaN	NaN	NaN	NaN	NaN	4.131	6.593	NaN	NaN	NaN	NaN	NaN	NaN
NaN	NaN	NaN	NaN	NaN	NaN	16.857	28.774	NaN	NaN	NaN	NaN	NaN	NaN
NaN	NaN	NaN	NaN	NaN	NaN	8.557	14.604	NaN	NaN	NaN	NaN	NaN	NaN
NaN	NaN	NaN	NaN	NaN	NaN	2.748	3.629	NaN	NaN	NaN	NaN	NaN	NaN
NaN	NaN	NaN	NaN	NaN	NaN	3.102	4.642	NaN	NaN	NaN	NaN	NaN	NaN
NaN	NaN	NaN	NaN	NaN	NaN	3.14	4.709	NaN	NaN	NaN	NaN	NaN	NaN
NaN	NaN	NaN	NaN	NaN	NaN	4.086	5.574	NaN	NaN	NaN	NaN	NaN	NaN
NaN	NaN	NaN	NaN	NaN	NaN	4.381	7.299	NaN	NaN	NaN	NaN	NaN	NaN
NaN	NaN	NaN	NaN	NaN	NaN	103.942	159.607	NaN	NaN	NaN	NaN	NaN	NaN
NaN	NaN	NaN	NaN	NaN	NaN	9.434	13.045	NaN	NaN	NaN	NaN	NaN	NaN
NaN	NaN	NaN	NaN	NaN	NaN	5.894	11.074	NaN	NaN	NaN	NaN	NaN	NaN
NaN	NaN	NaN	NaN	NaN	NaN	6.829	10.565	NaN	NaN	NaN	NaN	NaN	NaN
NaN	NaN	NaN	NaN	NaN	NaN	5.339	8.04	NaN	NaN	NaN	NaN	NaN	NaN
NaN	NaN	NaN	NaN	NaN	NaN	6.6	10.118	NaN	NaN	NaN	NaN	NaN	NaN
NaN	NaN	NaN	NaN	NaN	NaN	5.468	8.411	NaN	NaN	NaN	NaN	NaN	NaN
NaN	NaN	NaN	NaN	NaN	NaN	5.767	8.738	NaN	NaN	NaN	NaN	NaN	NaN
NaN	NaN	NaN	NaN	NaN	NaN	11.842	19.731	NaN	NaN	NaN	NaN	NaN	NaN
NaN	NaN	NaN	NaN	NaN	NaN	6.345	9.745	NaN	NaN	NaN	NaN	NaN	NaN
NaN	NaN	NaN	NaN	NaN	NaN	3.619	5.204	NaN	NaN	NaN	NaN	NaN	NaN
NaN	NaN	NaN	NaN	NaN	NaN	5.236	7.856	NaN	NaN	NaN	NaN	NaN	NaN
NaN	NaN	NaN	NaN	NaN	NaN	4.185	6.109	NaN	NaN	NaN	NaN	NaN	NaN
NaN	NaN	NaN	NaN	NaN	NaN	29.567	48.751	NaN	NaN	NaN	NaN	NaN	NaN
NaN	NaN	NaN	NaN	NaN	NaN	31.002	51.379	NaN	NaN	NaN	NaN	NaN	NaN
NaN	NaN	NaN	NaN	NaN	NaN	30.398	50.19	NaN	NaN	NaN	NaN	NaN	NaN
NaN	NaN	NaN	NaN	NaN	NaN	35.396	58.384	NaN	NaN	NaN	NaN	NaN	NaN
NaN	NaN	NaN	NaN	NaN	NaN	34.531	56.747	NaN	NaN	NaN	NaN	NaN	NaN
NaN	NaN	NaN	NaN	NaN	NaN	30.197	49.748	NaN	NaN	NaN	NaN	NaN	NaN
NaN	NaN	NaN	NaN	NaN	NaN	33.879	56.781	NaN	NaN	NaN	NaN	NaN	NaN
NaN	NaN	NaN	NaN	NaN	NaN	36.165	59.971	NaN	NaN	NaN	NaN	NaN	NaN
NaN	NaN	NaN	NaN	NaN	NaN	30.019	49.018	NaN	NaN	NaN	NaN	NaN	NaN
NaN	NaN	NaN	NaN	NaN	NaN	21.754	37.296	NaN	NaN	NaN	NaN	NaN	NaN
NaN	NaN	NaN	NaN	NaN	NaN	18.246	30.79	NaN	NaN	NaN	NaN	NaN	NaN
NaN	NaN	NaN	NaN	NaN	NaN	19.749	33.492	NaN	NaN	NaN	NaN	NaN	NaN
NaN	NaN	NaN	NaN	NaN	NaN	19.247	32.493	NaN	NaN	NaN	NaN	NaN	NaN
NaN	NaN	NaN	NaN	NaN	NaN	18.92	32.053	NaN	NaN	NaN	NaN	NaN	NaN
NaN	NaN	NaN	NaN	NaN	NaN	21.921	37.519	NaN	NaN	NaN	NaN	NaN	NaN
NaN	NaN	NaN	NaN	NaN	NaN	16.881	28.259	NaN	NaN	NaN	NaN	NaN	NaN
NaN	NaN	NaN	NaN	NaN	NaN	17.467	29.067	NaN	NaN	NaN	NaN	NaN	NaN
NaN	NaN	NaN	NaN	NaN	NaN	5.201	7.577	NaN	NaN	NaN	NaN	NaN	NaN
NaN	NaN	NaN	NaN	NaN	NaN	5.518	8.072	NaN	NaN	NaN	NaN	NaN	NaN
NaN	NaN	NaN	NaN	NaN	NaN	5.293	7.684	NaN	NaN	NaN	NaN	NaN	NaN
NaN	NaN	NaN	NaN	NaN	NaN	5.396	7.909	NaN	NaN	NaN	NaN	NaN	NaN
NaN	NaN	NaN	NaN	NaN	NaN	5.278	7.647	NaN	NaN	NaN	NaN	NaN	NaN
NaN	NaN	NaN	NaN	NaN	NaN	1.348	1.587	NaN	NaN	NaN	NaN	NaN	NaN
NaN	NaN	NaN	NaN	NaN	NaN	1.335	1.569	NaN	NaN	NaN	NaN	NaN	NaN
NaN	NaN	NaN	NaN	NaN	NaN	1.324	1.461	NaN	NaN	NaN	NaN	NaN	NaN
NaN	NaN	NaN	NaN	NaN	NaN	1.336	1.519	NaN	NaN	NaN	NaN	NaN	NaN
NaN	NaN	NaN	NaN	NaN	NaN	2.56	3.629	NaN	NaN	NaN	NaN	NaN	NaN
NaN	NaN	NaN	NaN	NaN	NaN	2.133	2.906	NaN	NaN	NaN	NaN	NaN	NaN
NaN	NaN	NaN	NaN	NaN	NaN	2.699	3.809	NaN	NaN	NaN	NaN	NaN	NaN
NaN	NaN	NaN	NaN	NaN	NaN	2.023	2.73	NaN	NaN	NaN	NaN	NaN	NaN
NaN	NaN	NaN	NaN	NaN	NaN	2.519	3.521	NaN	NaN	NaN	NaN	NaN	NaN
NaN	NaN	NaN	NaN	NaN	NaN	2.373	3.288	NaN	NaN	NaN	NaN	NaN	NaN
NaN	NaN	NaN	NaN	NaN	NaN	1.893	2.531	NaN	NaN	NaN	NaN	NaN	NaN
NaN	NaN	NaN	NaN	NaN	NaN	14.817	23.797	NaN	NaN	NaN	NaN	NaN	NaN
NaN	NaN	NaN	NaN	NaN	NaN	15.025	24.171	NaN	NaN	NaN	NaN	NaN	NaN
NaN	NaN	NaN	NaN	NaN	NaN	16.456	26.638	NaN	NaN	NaN	NaN	NaN	NaN
NaN	NaN	NaN	NaN	NaN	NaN	14.737	23.666	NaN	NaN	NaN	NaN	NaN	NaN
NaN	NaN	NaN	NaN	NaN	NaN	21.985	36.375	NaN	NaN	NaN	NaN	NaN	NaN
NaN	NaN	NaN	NaN	NaN	NaN	18.956	30.305	NaN	NaN	NaN	NaN	NaN	NaN
NaN	NaN	NaN	NaN	NaN	NaN	20.635	33.693	NaN	NaN	NaN	NaN	NaN	NaN
NaN	NaN	NaN	NaN	NaN	NaN	22.608	37.266	NaN	NaN	NaN	NaN	NaN	NaN
NaN	NaN	NaN	NaN	NaN	NaN	18.42	29.825	NaN	NaN	NaN	NaN	NaN	NaN
NaN	NaN	NaN	NaN	NaN	NaN	18.484	29.982	NaN	NaN	NaN	NaN	NaN	NaN
NaN	NaN	NaN	NaN	NaN	NaN	22.561	36.834	NaN	NaN	NaN	NaN	NaN	NaN
NaN	NaN	NaN	NaN	NaN	NaN	17.681	28.235	NaN	NaN	NaN	NaN	NaN	NaN
NaN	NaN	NaN	NaN	NaN	NaN	24.799	39.655	NaN	NaN	NaN	NaN	NaN	NaN
NaN	NaN	NaN	NaN	NaN	NaN	26.077	41.69	NaN	NaN	NaN	NaN	NaN	NaN
NaN	NaN	NaN	NaN	NaN	NaN	23.146	37.036	NaN	NaN	NaN	NaN	NaN	NaN
NaN	NaN	NaN	NaN	NaN	NaN	23.364	37.373	NaN	NaN	NaN	NaN	NaN	NaN
NaN	NaN	NaN	NaN	NaN	NaN	29.114	46.494	NaN	NaN	NaN	NaN	NaN	NaN
NaN	NaN	NaN	NaN	NaN	NaN	21.214	34.06	NaN	NaN	NaN	NaN	NaN	NaN
NaN	NaN	NaN	NaN	NaN	NaN	14.694	23.308	NaN	NaN	NaN	NaN	NaN	NaN
NaN	NaN	NaN	NaN	NaN	NaN	17.73	28.76	NaN	NaN	NaN	NaN	NaN	NaN
NaN	NaN	NaN	NaN	NaN	NaN	20.302	33.28	NaN	NaN	NaN	NaN	NaN	NaN
NaN	NaN	NaN	NaN	NaN	NaN	6.096	8.834	NaN	NaN	NaN	NaN	NaN	NaN
NaN	NaN	NaN	NaN	NaN	NaN	6.491	9.496	NaN	NaN	NaN	NaN	NaN	NaN
NaN	NaN	NaN	NaN	NaN	NaN	9.947	15.203	NaN	NaN	NaN	NaN	NaN	NaN
NaN	NaN	NaN	NaN	NaN	NaN	6.622	9.706	NaN	NaN	NaN	NaN	NaN	NaN
NaN	NaN	NaN	NaN	NaN	NaN	1.979	2.604	NaN	NaN	NaN	NaN	NaN	NaN
NaN	NaN	NaN	NaN	NaN	NaN	2.125	2.826	NaN	NaN	NaN	NaN	NaN	NaN
NaN	NaN	NaN	NaN	NaN	NaN	2.071	2.754	NaN	NaN	NaN	NaN	NaN	NaN
NaN	NaN	NaN	NaN	NaN	NaN	2.328	3.039	NaN	NaN	NaN	NaN	NaN	NaN
NaN	NaN	NaN	NaN	NaN	NaN	1.968	2.593	NaN	NaN	NaN	NaN	NaN	NaN
NaN	NaN	NaN	NaN	NaN	NaN	1.931	2.327	NaN	NaN	NaN	NaN	NaN	NaN
NaN	NaN	NaN	NaN	NaN	NaN	1.955	2.355	NaN	NaN	NaN	NaN	NaN	NaN
NaN	NaN	NaN	NaN	NaN	NaN	2.02	2.458	NaN	NaN	NaN	NaN	NaN	NaN
NaN	NaN	NaN	NaN	NaN	NaN	1.95	2.338	NaN	NaN	NaN	NaN	NaN	NaN
NaN	NaN	NaN	NaN	NaN	NaN	1.436	1.827	NaN	NaN	NaN	NaN	NaN	NaN
NaN	NaN	NaN	NaN	NaN	NaN	1.431	1.821	NaN	NaN	NaN	NaN	NaN	NaN
NaN	NaN	NaN	NaN	NaN	NaN	1.45	1.851	NaN	NaN	NaN	NaN	NaN	NaN
NaN	NaN	NaN	NaN	NaN	NaN	1.42	1.803	NaN	NaN	NaN	NaN	NaN	NaN
NaN	NaN	NaN	NaN	NaN	NaN	12.424	22.143	NaN	NaN	NaN	NaN	NaN	NaN
NaN	NaN	NaN	NaN	NaN	NaN	13.226	24.124	NaN	NaN	NaN	NaN	NaN	NaN
NaN	NaN	NaN	NaN	NaN	NaN	3.603	6.035	NaN	NaN	NaN	NaN	NaN	NaN
NaN	NaN	NaN	NaN	NaN	NaN	12.427	21.968	NaN	NaN	NaN	NaN	NaN	NaN
NaN	NaN	NaN	NaN	NaN	NaN	12.337	22.259	NaN	NaN	NaN	NaN	NaN	NaN
NaN	NaN	NaN	NaN	NaN	NaN	12.639	22.546	NaN	NaN	NaN	NaN	NaN	NaN
NaN	NaN	NaN	NaN	NaN	NaN	13.307	23.819	NaN	NaN	NaN	NaN	NaN	NaN
NaN	NaN	NaN	NaN	NaN	NaN	13.581	24.464	NaN	NaN	NaN	NaN	NaN	NaN
NaN	NaN	NaN	NaN	NaN	NaN	10.185	17.969	NaN	NaN	NaN	NaN	NaN	NaN
NaN	NaN	NaN	NaN	NaN	NaN	12.129	21.529	NaN	NaN	NaN	NaN	NaN	NaN
NaN	NaN	NaN	NaN	NaN	NaN	11.483	20.889	NaN	NaN	NaN	NaN	NaN	NaN
NaN	NaN	NaN	NaN	NaN	NaN	22.674	37.498	NaN	NaN	NaN	NaN	NaN	NaN
NaN	NaN	NaN	NaN	NaN	NaN	29.988	51.696	NaN	NaN	NaN	NaN	NaN	NaN
NaN	NaN	NaN	NaN	NaN	NaN	19.055	31.618	NaN	NaN	NaN	NaN	NaN	NaN
NaN	NaN	NaN	NaN	NaN	NaN	22.758	38.958	NaN	NaN	NaN	NaN	NaN	NaN
NaN	NaN	NaN	NaN	NaN	NaN	32.704	55.342	NaN	NaN	NaN	NaN	NaN	NaN
NaN	NaN	NaN	NaN	NaN	NaN	24.666	41.946	NaN	NaN	NaN	NaN	NaN	NaN
NaN	NaN	NaN	NaN	NaN	NaN	24.141	41.822	NaN	NaN	NaN	NaN	NaN	NaN
NaN	NaN	NaN	NaN	NaN	NaN	8.539	14.725	NaN	NaN	NaN	NaN	NaN	NaN
NaN	NaN	NaN	NaN	NaN	NaN	8.696	15.016	NaN	NaN	NaN	NaN	NaN	NaN
NaN	NaN	NaN	NaN	NaN	NaN	8.783	15.179	NaN	NaN	NaN	NaN	NaN	NaN
NaN	NaN	NaN	NaN	NaN	NaN	9.011	15.513	NaN	NaN	NaN	NaN	NaN	NaN
NaN	NaN	NaN	NaN	NaN	NaN	7.912	14.113	NaN	NaN	NaN	NaN	NaN	NaN
NaN	NaN	NaN	NaN	NaN	NaN	7.018	13.055	NaN	NaN	NaN	NaN	NaN	NaN
NaN	NaN	NaN	NaN	NaN	NaN	7.199	13.29	NaN	NaN	NaN	NaN	NaN	NaN
NaN	NaN	NaN	NaN	NaN	NaN	19.032	35.748	NaN	NaN	NaN	NaN	NaN	NaN
NaN	NaN	NaN	NaN	NaN	NaN	18.233	34.015	NaN	NaN	NaN	NaN	NaN	NaN
NaN	NaN	NaN	NaN	NaN	NaN	18.816	35.234	NaN	NaN	NaN	NaN	NaN	NaN
NaN	NaN	NaN	NaN	NaN	NaN	18.632	31.869	NaN	NaN	NaN	NaN	NaN	NaN
NaN	NaN	NaN	NaN	NaN	NaN	15.341	26.138	NaN	NaN	NaN	NaN	NaN	NaN
NaN	NaN	NaN	NaN	NaN	NaN	20.223	34.674	NaN	NaN	NaN	NaN	NaN	NaN
NaN	NaN	NaN	NaN	NaN	NaN	16.319	28.144	NaN	NaN	NaN	NaN	NaN	NaN
NaN	NaN	NaN	NaN	NaN	NaN	17.336	29.587	NaN	NaN	NaN	NaN	NaN	NaN
NaN	NaN	NaN	NaN	NaN	NaN	15.547	24.001	NaN	NaN	NaN	NaN	NaN	NaN
NaN	NaN	NaN	NaN	NaN	NaN	12.152	19.422	NaN	NaN	NaN	NaN	NaN	NaN
NaN	NaN	NaN	NaN	NaN	NaN	14.774	22.833	NaN	NaN	NaN	NaN	NaN	NaN
NaN	NaN	NaN	NaN	NaN	NaN	4.304	6.771	NaN	NaN	NaN	NaN	NaN	NaN
NaN	NaN	NaN	NaN	NaN	NaN	4.34	6.807	NaN	NaN	NaN	NaN	NaN	NaN
NaN	NaN	NaN	NaN	NaN	NaN	4.272	6.737	NaN	NaN	NaN	NaN	NaN	NaN
NaN	NaN	NaN	NaN	NaN	NaN	1.852	2.407	NaN	NaN	NaN	NaN	NaN	NaN
NaN	NaN	NaN	NaN	NaN	NaN	1.899	2.476	NaN	NaN	NaN	NaN	NaN	NaN
NaN	NaN	NaN	NaN	NaN	NaN	1.913	2.5	NaN	NaN	NaN	NaN	NaN	NaN
NaN	NaN	NaN	NaN	NaN	NaN	1.54	2.088	NaN	NaN	NaN	NaN	NaN	NaN
NaN	NaN	NaN	NaN	NaN	NaN	1.563	2.128	NaN	NaN	NaN	NaN	NaN	NaN
NaN	NaN	NaN	NaN	NaN	NaN	1.467	1.966	NaN	NaN	NaN	NaN	NaN	NaN
NaN	NaN	NaN	NaN	NaN	NaN	44.218	68.083	NaN	NaN	NaN	NaN	NaN	NaN
NaN	NaN	NaN	NaN	NaN	NaN	41.552	64.456	NaN	NaN	NaN	NaN	NaN	NaN
NaN	NaN	NaN	NaN	NaN	NaN	40.618	63.288	NaN	NaN	NaN	NaN	NaN	NaN
NaN	NaN	NaN	NaN	NaN	NaN	37.63	59.514	NaN	NaN	NaN	NaN	NaN	NaN
NaN	NaN	NaN	NaN	NaN	NaN	40.72	63.405	NaN	NaN	NaN	NaN	NaN	NaN
NaN	NaN	NaN	NaN	NaN	NaN	38.167	60.342	NaN	NaN	NaN	NaN	NaN	NaN
NaN	NaN	NaN	NaN	NaN	NaN	42.607	65.74	NaN	NaN	NaN	NaN	NaN	NaN
NaN	NaN	NaN	NaN	NaN	NaN	43.916	67.423	NaN	NaN	NaN	NaN	NaN	NaN
NaN	NaN	NaN	NaN	NaN	NaN	44.761	68.677	NaN	NaN	NaN	NaN	NaN	NaN
NaN	NaN	NaN	NaN	NaN	NaN	38.073	60.075	NaN	NaN	NaN	NaN	NaN	NaN
NaN	NaN	NaN	NaN	NaN	NaN	20.423	31.664	NaN	NaN	NaN	NaN	NaN	NaN
NaN	NaN	NaN	NaN	NaN	NaN	20.675	32.044	NaN	NaN	NaN	NaN	NaN	NaN
NaN	NaN	NaN	NaN	NaN	NaN	17.401	26.898	NaN	NaN	NaN	NaN	NaN	NaN
NaN	NaN	NaN	NaN	NaN	NaN	16.272	25.4	NaN	NaN	NaN	NaN	NaN	NaN
NaN	NaN	NaN	NaN	NaN	NaN	15.621	24.169	NaN	NaN	NaN	NaN	NaN	NaN
NaN	NaN	NaN	NaN	NaN	NaN	17.9	27.699	NaN	NaN	NaN	NaN	NaN	NaN
NaN	NaN	NaN	NaN	NaN	NaN	7.316	7.905	NaN	NaN	NaN	NaN	NaN	NaN
NaN	NaN	NaN	NaN	NaN	NaN	6.286	6.4	NaN	NaN	NaN	NaN	NaN	NaN
NaN	NaN	NaN	NaN	NaN	NaN	5.089	5.087	NaN	NaN	NaN	NaN	NaN	NaN
NaN	NaN	NaN	NaN	NaN	NaN	18.586	28.799	NaN	NaN	NaN	NaN	NaN	NaN
NaN	NaN	NaN	NaN	NaN	NaN	18.468	28.6	NaN	NaN	NaN	NaN	NaN	NaN
NaN	NaN	NaN	NaN	NaN	NaN	14.448	21.806	NaN	NaN	NaN	NaN	NaN	NaN
NaN	NaN	NaN	NaN	NaN	NaN	19.417	30.229	NaN	NaN	NaN	NaN	NaN	NaN
NaN	NaN	NaN	NaN	NaN	NaN	17.064	26.229	NaN	NaN	NaN	NaN	NaN	NaN
NaN	NaN	NaN	NaN	NaN	NaN	20.156	31.41	NaN	NaN	NaN	NaN	NaN	NaN
NaN	NaN	NaN	NaN	NaN	NaN	12.444	18.21	NaN	NaN	NaN	NaN	NaN	NaN
NaN	NaN	NaN	NaN	NaN	NaN	21.617	33.852	NaN	NaN	NaN	NaN	NaN	NaN
NaN	NaN	NaN	NaN	NaN	NaN	19.563	30.448	NaN	NaN	NaN	NaN	NaN	NaN
NaN	NaN	NaN	NaN	NaN	NaN	9.252	19.401	NaN	NaN	NaN	NaN	NaN	NaN
NaN	NaN	NaN	NaN	NaN	NaN	10.123	21.149	NaN	NaN	NaN	NaN	NaN	NaN
NaN	NaN	NaN	NaN	NaN	NaN	9.32	19.462	NaN	NaN	NaN	NaN	NaN	NaN
NaN	NaN	NaN	NaN	NaN	NaN	10.136	21.284	NaN	NaN	NaN	NaN	NaN	NaN
NaN	NaN	NaN	NaN	NaN	NaN	9.856	20.654	NaN	NaN	NaN	NaN	NaN	NaN
[truncated: 6,001 more rows]

## Sheet: Fig2.a
13.38	16.018	7.568	7.084	13.642	16.005	13.023	15.881	11.247	9.527	9.527	10.463	10.683	8.894
11.184	13.075	7.763	7.26	13.613	15.948	12.222	14.789	11.117	9.467	8.924	9.796	10.542	8.857
12.605	15.051	7.938	7.413	13.81	16.155	12.331	14.943	11.107	9.492	8.652	9.501	10.66	8.877
13.384	16.066	8.582	7.968	12.613	14.684	12.834	15.628	11.47	9.71	9.072	9.953	10.387	8.697
12.383	14.761	7.789	7.28	13.693	16.092	12.052	14.561	10.369	9.107	9.15	10.045	10.688	8.969
12.783	15.207	8.376	7.791	13.747	16.156	15.052	18.737	12.387	9.991	9.291	10.195	10.463	8.812
12.461	14.768	8.205	7.643	12.512	14.627	12.741	15.497	11.189	9.503	9.443	10.363	10.321	8.654
10.821	12.838	7.978	7.446	13.478	15.81	10.732	12.72	12.721	10.372	8.847	9.687	10.174	8.593
9.37	10.918	8.357	7.775	13.542	15.732	12.051	14.557	11.201	9.514	8.436	9.153	10.822	9.091
11.606	13.617	8.442	7.848	15.075	16.797	11.446	13.723	13.83	10.756	8.541	9.401	10.432	8.766
12.209	14.47	8.933	8.272	14.728	16.45	17.792	24.252	9.056	8.554	9.666	10.613	10.496	8.838
12.79	15.16	6.371	6.443	14.926	16.708	17.608	23.947	9.063	8.557	8.751	9.593	10.378	8.692
15.679	18.676	6.398	6.474	14.738	16.437	17.73	24.139	9.294	8.755	8.782	9.651	10.571	8.903
16.079	19.204	6.324	6.428	15.806	17.615	17.815	24.132	9.259	8.783	6.482	6.693	10.383	8.703
16.272	19.456	6.283	6.382	14.022	15.552	17.913	24.294	9.127	8.575	6.811	7.036	10.521	8.796
15.688	18.675	6.267	6.38	14.904	16.66	17.801	24.247	10.064	9.141	4.899	4.992	10.373	8.786
15.461	18.381	6.328	6.443	14.483	16.055	17.231	23.326	9.338	8.818	6.5	6.723	10.292	8.728
15.326	18.222	6.537	6.662	14.943	16.756	17.661	23.889	8.713	8.324	6.299	6.504	10.737	9.221
16.416	19.669	6.125	6.166	13.156	14.459	18.091	24.673	9.273	8.65	4.219	4.309	9.824	8.504
15.24	18.12	6.013	6.101	9.362	9.539	16.587	20.943	9.186	8.608	4.258	4.349	10.604	9.106
15.108	17.957	5.873	5.962	9.398	9.54	16.397	20.648	10.036	9.141	4.15	4.238	10.217	8.805
9.832	11.524	8.294	7.564	9.307	9.474	16.58	20.919	8.788	8.49	3.71	3.777	10.356	8.922
10.647	12.622	8.203	7.483	9.344	9.481	16.632	20.99	8.758	8.494	4.721	4.828	10.835	9.292
13.727	16.284	8.113	7.399	9.235	9.371	16.418	20.683	9.019	8.574	5.577	5.736	10.601	9.109
10.668	12.537	8.295	7.561	9.51	9.702	16.699	21.105	8.935	8.536	5.45	5.601	8.729	7.447
14.92	17.933	8.223	7.498	9.322	9.481	16.321	20.526	10.273	8.975	5.268	5.407	9.958	8.306
19.852	24.012	8.43	7.656	9.212	9.34	16.676	21.031	10.539	9.115	5.583	5.742	9.744	8.157
21.945	26.714	8.175	7.424	9.241	9.358	12.111	14.801	10.69	9.202	5.455	5.606	9.975	8.314
20.493	24.855	8.529	7.755	9.7	9.919	12.499	15.391	9.523	8.647	4.649	4.759	10.013	8.351
20.154	24.388	8.051	7.344	8.743	8.779	12.233	15.041	9.467	8.609	4.432	4.538	9.278	7.84
20.82	25.236	8.005	7.308	8.687	8.714	12.335	15.098	9.646	8.652	5.138	5.255	9.449	7.955
20.506	24.848	7.559	7.042	8.767	8.8	12.335	15.191	9.76	8.557	4.813	4.925	9.962	8.31
18.628	22.446	7.595	7.076	8.634	8.658	8.243	9.629	9.746	8.526	4.597	4.706	9.753	8.165
11.148	13.331	5.787	5.478	8.885	8.937	8.394	9.866	9.211	8.574	4.826	4.938	9.625	8.075
11.171	13.375	7.301	6.813	8.572	8.632	7.732	8.761	9.222	8.58	4.593	4.69	5.277	4.938
11.142	13.324	7.042	6.584	8.717	8.791	7.823	8.939	9.123	8.554	9.623	10.546	5.344	4.999
11.118	13.29	7.211	6.734	8.602	8.672	11.694	14.7	9.133	8.559	9.596	10.518	5.24	4.918
11.159	13.356	7.067	6.606	8.583	8.646	11.873	15.04	9.21	8.51	9.716	10.66	5.21	4.873
11.112	13.271	7.162	6.691	8.62	8.686	11.705	14.755	9.199	8.508	9.759	10.717	5.247	4.91
8.179	9.139	7.351	6.858	8.443	8.504	11.918	15.125	9.24	8.531	6.575	6.958	5.222	4.888
8.33	9.162	6.993	6.544	8.878	8.964	11.769	14.877	9.206	8.51	6.7	7.102	5.231	4.903
8.323	9.281	7.122	6.648	8.586	8.516	11.829	14.998	12.639	10.563	7.158	7.625	2.315	2.25
8.316	9.27	7.185	6.711	8.945	10.208	11.904	15.064	12.065	10.218	7.394	7.904	2.304	2.237
8.313	9.323	6.732	6.554	8.974	10.249	16.129	21.918	12.424	10.425	5.362	5.566	2.298	2.234
17.709	20.92	6.775	6.585	8.98	10.253	16.109	21.922	12.131	10.274	5.455	5.668	2.334	2.268
17.697	20.915	6.73	6.556	8.994	10.26	16.076	21.945	11.323	9.799	5.439	5.65	2.187	2.125
17.402	20.549	6.725	6.56	9.002	10.265	16.123	21.916	12.903	10.857	5.499	5.715	2.304	2.242
17.714	20.928	5.675	5.689	8.963	10.236	18.239	23.436	13.06	10.955	6.217	6.49	8.377	7.22
20.718	25.391	5.498	5.504	8.977	10.254	19.154	24.673	13.2	11.04	6.092	6.349	5.039	4.801
20.761	25.457	5.635	5.649	16.771	19.722	18.356	23.573	10.734	9.539	6.245	6.521	5.03	4.797
20.132	24.629	5.656	5.664	16.56	19.322	18.554	23.887	9.664	8.851	6.221	6.494	5.058	4.827
20.785	25.479	6.84	6.811	16.661	19.453	17.991	23.029	9.001	8.036	6.154	6.419	7.332	6.669
20.409	24.989	6.806	6.734	16.744	19.561	17.952	22.976	9.137	8.14	6.76	7.101	7.347	6.679
20.79	25.489	6.62	6.683	16.484	19.216	18.912	24.376	9.038	8.047	6.314	6.6	7.186	6.56
6.85	7.652	7.63	7.905	14.957	17.69	19.109	24.609	9.044	8.061	6.345	6.634	7.172	6.551
6.87	7.675	7.738	8.035	14.883	17.609	19.985	26.128	8.258	7.78	8.086	8.846	10.312	8.767
6.873	7.678	7.668	7.95	14.893	17.62	19.398	25.433	8.404	7.879	8.073	8.834	10.164	8.645
6.877	7.685	7.771	8.076	15.078	17.826	19.809	25.953	8.336	7.832	8.104	8.868	10.203	8.678
6.528	7.276	7.346	6.935	13.583	15.599	20.278	26.49	8.158	7.71	8.175	8.943	10.203	8.675
7.61	8.983	7.161	6.777	13.497	15.502	19.476	25.475	8.061	7.643	4.084	4.158	9.841	8.387
7.754	9.154	7.506	7.072	13.249	15.221	19.105	25.163	8.464	7.921	4.063	4.136	10.462	8.88
7.655	9.036	7.189	6.805	13.552	15.556	16.489	22.083	7.979	7.59	4.025	4.098	6.523	6.004
7.852	9.269	7.135	6.759	12.029	14.653	16.176	21.926	8.246	7.77	4.236	4.302	6.269	5.816
7.804	9.212	7.099	6.722	12.062	14.693	16.031	21.708	8.23	7.908	5.447	5.596	6.55	6.019
16.798	20.373	6.525	6.21	11.989	14.598	16.106	20.974	8.076	7.843	5.484	5.627	6.534	6.014
16.195	19.625	7.268	6.831	11.902	14.502	16.092	20.969	8.089	7.854	5.842	6.001	12.875	10.624
16.41	19.892	7.123	6.706	7.575	8.408	16.522	21.842	8.107	7.862	5.835	5.997	12.594	10.417
16.833	20.411	6.56	6.236	7.662	8.504	16.172	21.103	8.096	7.856	4.593	4.681	12.074	10.031
13.995	17.876	6.901	6.52	7.635	8.475	15.262	20.596	10.318	8.19	4.632	4.722	12.371	10.252
14.318	18.307	6.633	6.296	7.691	8.537	15.072	20.31	10.21	8.13	4.659	4.748	13.018	10.821
14.204	18.15	7.524	7.048	8.412	8.624	15.1	20.352	10.275	8.164	4.196	4.272	12.885	10.736
17.197	21.667	5.73	5.503	8.861	9.113	14.877	19.971	9.994	7.991	4.107	4.171	13.024	10.825
17.364	21.795	6.017	5.758	9.33	9.692	15.249	20.577	10.372	8.196	4.943	5.057	13.038	10.841
17.164	21.619	6.044	5.784	8.637	8.836	10.164	12.578	7.232	6.883	4.896	5.007	7.753	6.953
18.881	22.655	5.912	5.667	8.399	8.645	9.968	12.283	7.244	6.894	4.851	4.959	7.646	6.871
19.008	22.805	5.765	5.536	13.47	14.695	10.22	12.65	7.197	6.886	6.07	6.056	7.737	6.94
18.957	22.751	5.854	5.612	13.452	14.669	9.651	11.812	7.541	7.001	6.309	6.287	7.66	6.879
18.917	22.695	7.719	8.017	13.427	14.648	13.087	17.322	7.206	6.902	6.235	6.217	12.454	10.073
11.378	13.294	7.543	7.809	10.845	11.115	13.076	17.309	7.314	6.951	6.363	6.336	12.565	10.153
11.371	13.286	7.429	7.693	10.792	11.031	13.114	17.36	8.456	8.306	5.043	5.223	12.549	10.144
11.173	13.045	7.695	7.991	10.781	11.015	13.055	17.281	8.421	8.274	5.046	5.23	12.763	10.293
9.364	10.761	7.776	8.088	10.645	10.841	14.296	18.313	8.39	8.246	5.037	5.219	12.701	10.247
9.89	11.427	9.972	8.902	10.939	11.235	11.099	14.102	8.391	8.246	5.045	5.228	12.491	10.105
11.247	13.13	10.031	8.955	10.681	10.914	8.249	9.908	8.453	8.304	7.032	7.122	11.471	9.38
10.738	12.496	9.95	8.877	11.22	11.793	15.431	19.799	8.419	8.267	7.131	7.276	11.519	9.414
11.6	13.572	9.966	8.899	11.04	11.588	12.62	16.106	8.904	8.587	7.149	7.289	11.082	9.099
9.935	11.486	9.973	8.902	11.278	11.864	14.22	18.211	8.869	8.524	5.867	6.422	11.388	9.322
5.394	5.843	9.947	8.889	11.302	11.891	14.204	18.185	8.84	8.5	5.889	6.446	11.258	9.214
5.386	5.856	8.146	7.524	11.661	12.298	13.409	17.138	8.809	8.481	6.84	7.114	5.094	4.695
5.394	5.881	8.147	7.522	6.226	6.071	15.849	20.315	8.038	6.948	6.838	7.111	5.085	4.685
5.359	5.822	8.146	7.518	6.187	6.025	14.91	19.125	8.033	6.946	5.093	5.176	6.733	6.3
5.35	5.838	7.946	7.355	6.776	6.709	11.494	14.621	7.957	6.901	5.343	5.422	6.839	6.387
5.405	5.884	8.151	7.521	6.694	6.612	11.715	14.408	9.011	8.396	5.208	5.295	6.892	6.424
5.332	5.774	6.328	5.947	8.743	8.838	10.316	12.859	9.006	8.384	4.166	4.25	6.817	6.363
5.406	5.861	6.319	5.941	10.957	13.255	11.632	14.374	9.025	8.399	4.231	4.319	11.38	9.269
6.115	6.501	6.316	5.94	10.906	13.178	10.996	13.663	18.544	13.452	4.462	4.563	11.341	9.247
6.086	6.479	6.289	5.918	10.962	13.271	10.525	13.085	18.419	13.382	4.439	4.538	11.397	9.274
6.199	6.579	6.324	5.942	10.961	13.27	10.992	13.649	18.389	13.374	5.266	5.386	11.286	9.234
6.069	6.459	9.294	8.407	11.112	13.305	10.758	13.393	10.334	9.414	5.277	5.399	12.891	10.569
6.129	6.515	7.745	7.134	11.101	13.29	7.167	8.28	10.298	9.393	4.368	4.438	12.889	10.56
6.193	6.575	8.422	7.705	11.288	13.548	7.279	8.429	10.307	9.398	4.364	4.433	12.893	10.567
5.049	5.25	7.567	6.992	11.116	13.305	7.586	8.827	12.235	9.709	6.171	6.415	12.894	10.573
5.01	5.21	8.012	7.379	16.104	18.679	7.228	8.367	12.022	9.587	6.367	6.616	9.766	8.407
4.654	4.801	6.036	5.906	16.635	19.451	14.389	18.445	12.09	9.671	6.254	6.5	10.364	8.873
4.707	4.855	6.03	5.906	16.668	19.488	13.024	16.604	7.819	6.961	4.689	4.721	10.272	8.801
4.948	5.135	8.113	8.386	17.479	20.32	13.149	16.78	7.853	7.014	4.673	4.706	10.229	8.768
5.978	6.494	8.091	8.35	16.462	19.075	15.351	19.729	7.809	6.995	4.105	3.993	12.927	10.876
5.919	6.422	8.061	8.299	16.824	19.556	15.246	19.582	7.513	6.859	4.467	4.525	12.802	10.78
5.935	6.444	8.074	8.325	17.005	19.738	15.342	19.712	7.515	6.832	4.448	4.506	12.818	10.792
5.959	6.474	8.111	8.374	14.584	17.995	14.861	18.645	7.538	6.822	2.648	2.58	12.786	10.767
5.896	6.389	7.611	7.15	14.734	18.093	14.472	18.165	7.514	6.87	4.163	4.254	13.022	10.603
5.911	6.412	7.961	7.453	14.49	17.945	8.806	10.726	9.375	8.369	2.572	2.588	12.984	10.602
9.759	11.202	7.947	7.44	14.439	17.917	9.856	12.115	9.336	8.343	3.072	3.095	12.988	10.602
9.779	11.226	7.96	7.452	12.393	14.912	9.435	11.536	9.322	8.332	3.199	3.238	12.993	10.599
9.878	11.35	8.615	7.953	12.438	14.966	10.759	12.649	7.659	6.887	1.983	1.954	12.981	10.601
9.774	11.22	8.445	7.813	12.381	14.918	11.099	13.072	7.925	7.088	2.059	2.027	9.336	8.112
9.748	11.188	8.53	7.88	12.55	15.134	10.712	12.544	7.945	7.102	2.834	2.895	9.614	8.306
9.911	11.252	8.315	7.738	12.599	15.191	8.461	10.081	8.051	7.181	5.534	5.7	9.731	8.389
10.167	11.57	8.443	9.156	12.598	15.189	8.422	10.004	8.913	8.815	5.541	5.708	9.762	8.41
9.995	11.356	8.491	9.193	12.578	15.168	8.478	10.095	8.734	8.702	5.545	5.713	9.864	8.482
10.007	11.371	8.462	9.172	11.204	13.482	7.291	8.421	8.907	8.866	5.61	5.761	8.028	7.038
9.922	11.265	8.343	9.085	11.004	13.253	7.286	8.422	8.859	8.797	5.355	5.505	7.859	6.906
10.053	11.426	7.88	7.256	11.142	13.398	7.305	8.448	9.287	8.145	5.582	5.729	7.879	6.923
12.094	14.248	7.773	7.161	11.109	13.399	6.464	7.308	9.408	8.237	5.047	5.179	7.811	6.869
11.82	13.918	7.743	7.133	11.325	13.641	6.46	7.311	9.496	8.289	5.123	5.251	7.954	7.002
12.189	14.363	6.178	5.792	10.891	13.439	6.465	7.288	9.303	8.18	5.089	5.216	7.832	6.91
12.396	14.617	6.179	5.792	10.904	13.457	14.617	19.466	9.575	8.33	5.319	5.443	7.918	6.975
12.103	14.259	4.781	4.63	10.854	13.371	14.576	19.435	9.165	8.087	5.278	5.401	7.964	7.01
11.811	13.902	4.729	4.581	10.83	13.334	14.338	19.074	8.862	8.85	4.739	4.836	10.691	9.016
6.404	7.39	4.576	4.417	13.148	15.988	13.598	17.946	8.781	8.768	4.297	4.379	10.61	8.958
6.495	7.486	4.568	4.408	13.132	15.972	14.369	19.118	8.774	7.876	4.41	4.502	10.712	9.034
6.371	7.363	7.664	7.092	13.154	15.988	13.646	18.061	8.782	7.874	5.085	5.201	10.872	9.15
7.609	8.633	7.759	7.165	12.262	13.454	14.866	19.865	8.761	7.893	5.082	5.198	10.797	9.097
10.887	12.451	6.172	5.965	12.03	13.191	15.085	20.186	8.762	7.876	4.072	4.137	2.415	2.325
11.011	12.592	6.171	5.969	12.123	13.296	14.986	20.029	9.789	9.704	4.104	4.17	2.393	2.305
11.092	12.686	6.63	6.173	12.338	13.529	13.684	18.051	9.13	9.024	4.006	4.061	2.385	2.299
11.094	12.689	6.641	6.182	12.274	13.466	7.734	8.216	9.716	9.629	4.047	4.103	2.87	2.729
10.618	12.111	6.562	6.112	8.277	9.169	7.832	8.338	9.583	9.388	3.886	3.929	2.869	2.728
10.443	11.937	5.052	4.892	8.603	9.583	7.677	8.122	9.59	9.395	4.364	4.419	5.782	5.131
5.518	5.893	5.058	4.899	8.469	9.401	7.193	7.52	9.523	9.415	4.49	4.551	5.921	5.241
5.527	5.903	5.056	4.898	8.485	9.445	7.448	7.824	8.629	7.929	4.385	4.437	5.833	5.17
5.576	5.96	5.052	4.891	10.071	11.554	7.655	8.099	8.534	7.899	4.261	4.32	5.854	5.187
5.477	5.844	4.801	4.783	10.094	11.58	8.263	8.12	8.578	7.913	4.221	4.278	5.87	5.2
5.42	5.779	4.83	4.808	10.146	11.699	9.022	8.462	8.582	7.915	4.079	4.13	6.077	5.303
9.531	11.007	4.856	4.836	10.1	11.638	8.875	8.203	8.635	8.1	4.155	4.208	6.148	5.35
9.662	11.166	4.714	4.701	13.747	15.165	7.876	8.283	8.676	8.135	4.078	4.132	6.209	5.391
9.687	11.194	4.27	4.207	13.396	14.756	7.873	8.279	8.678	8.15	3.416	3.448	6.171	5.366
8.89	9.926	4.257	4.189	14.186	15.669	7.822	8.224	8.266	7.411	2.608	2.623	6.52	5.638
8.859	9.891	4.265	4.201	10.985	12.001	7.914	8.342	8.295	7.42	2.7	2.716	9.308	7.799
9.018	10.078	4.25	4.179	11.19	12.209	7.845	8.239	7.783	6.926	4.708	4.796	9.362	7.841
8.976	10.032	3.926	3.862	11.138	12.177	7.867	8.258	7.729	6.89	4.74	4.828	9.469	7.926
11.559	13.53	3.915	3.853	10.946	11.954	7.703	8.068	7.938	7.044	5.179	5.296	9.473	7.927
11.193	13.065	3.683	3.663	16.634	18.88	7.874	8.263	7.848	6.987	4.165	4.231	7.634	6.888
10.82	12.596	4.791	4.724	16.456	18.66	7.892	8.305	7.893	7.016	3.917	3.808	7.62	6.875
6.17	6.661	4.763	4.704	14.673	16.246	12.663	16.711	9.193	8.204	5.569	5.728	6.726	5.75
6.193	6.684	4.782	4.715	15.046	16.686	13.08	17.202	9.189	8.202	5.58	5.738	6.735	5.759
5.32	5.458	4.793	4.728	9.494	10.001	12.914	17.051	6.945	6.812	5.367	5.513	9.054	7.895
5.272	5.409	4.665	4.597	9.494	10.013	13.275	17.535	6.932	6.81	3.844	3.939	8.829	7.72
5.32	5.459	5.195	5.03	9.756	10.328	13.157	17.376	11.169	9.513	5.892	6.448	6.235	5.753
8.268	8.688	5.104	4.921	9.776	10.376	12.954	17.029	11.99	9.609	4.223	4.313	6.254	5.777
8.203	8.589	5.117	4.94	10.013	11.533	13.025	17.2	7.812	6.996	4.106	4.194	4.897	4.827
8.27	8.701	5.024	4.972	10.079	11.605	12.153	15.756	9.243	8.254	9.513	10.417	4.873	4.807
4.1	4.281	5.019	4.966	10.056	11.589	11.034	13.294	9.178	8.241	4.081	4.156	5.638	4.94
4.094	4.276	5.011	4.958	5.596	5.373	12.686	15.64	9.178	8.301	11.554	12.654	5.64	4.943
6.456	7.037	5.406	5.12	5.613	5.383	11.571	13.994	9.36	8.456	11.061	12.084	4.277	4.251
6.111	6.593	5.467	5.167	8.217	7.956	11.072	13.292	8.818	8.106	10.89	11.906	4.285	4.258
5.863	6.293	9.921	8.852	8.278	8.079	11.976	14.597	9.598	8.397	11.13	12.144	4.265	4.239
5.779	6.348	8.486	7.884	8.243	8.042	11.498	13.864	9.215	8.254	11.237	12.284	4.823	4.77
5.813	6.389	7.674	7.179	8.216	8.01	11.01	13.221	9.798	8.649	11.308	12.35	4.83	4.777
5.87	5.715	7.234	6.754	8.234	8.028	14.195	17.947	9.221	8.269	11.376	12.503	4.867	4.824
5.887	5.734	10.776	9.733	8.247	8.038	13.337	16.648	10.868	9.04	10.803	11.713	4.902	4.855
5.771	5.638	12.234	10.997	7.737	7.369	8.956	8.998	7.914	7.718	9.414	10.423	5.612	5.294
3.802	3.968	12.901	11.579	7.798	7.37	9.197	9.246	7.912	7.714	10.95	12.055	5.606	5.29
3.794	3.957	14.169	12.682	7.78	7.375	9.25	9.43	8.147	7.926	11.608	12.751	5.637	5.252
4.515	4.606	11.983	10.776	7.563	7.167	9.175	9.373	8.244	8.049	10.832	11.786	5.526	5.172
4.528	4.62	13.519	12.117	7.599	7.181	11.167	14.673	7.926	7.701	11.041	12.097	5.545	5.182
4.54	4.634	13.321	11.944	10.028	10.326	11.219	14.763	8.225	7.82	6.293	6.525	5.345	5.001
3.871	3.81	12.715	11.416	9.914	10.19	11.154	14.657	8.254	8.037	6.133	6.356	5.349	4.997
3.873	3.811	13.583	12.173	9.843	10.104	10.644	13.357	7.914	7.754	5.915	6.127	4.871	4.841
9.889	11.363	13.821	12.38	9.998	10.294	10.268	12.837	8.056	7.782	6.59	6.838	4.885	4.854
11.7	13.783	14.009	12.553	9.911	10.184	10.616	13.354	7.963	7.722	6.418	6.658	5.144	5.078
12.76	15.135	8.33	8.962	6.864	6.68	10.528	13.176	8.259	7.868	4.246	4.391	5.129	5.054
15.624	18.6	8.35	8.998	6.724	6.529	15.32	19.999	7.989	7.872	4.324	4.475	4.952	4.927
20.763	25.171	8.693	9.349	6.719	6.525	15.365	20.053	7.951	7.866	4.212	4.355	4.962	4.937
9.517	10.983	8.603	9.23	6.698	6.508	15.246	19.909	8.143	7.916	3.504	3.604	3.651	3.644
8.664	9.658	8.733	9.371	6.68	6.488	13.154	17.03	7.986	7.82	4.978	5.114	3.657	3.65
6.203	6.695	8.866	9.544	7.43	6.937	13.14	17.007	8.768	7.989	5.827	6.012	3.279	3.257
16.542	20.056	8.468	9.217	7.741	7.204	13.177	17.05	8.916	8.064	5.652	5.826	3.269	3.247
15.591	18.546	8.355	8.886	7.463	6.967	12.875	17.041	8.983	8.1	5.481	5.646	2.595	2.561
5.912	6.411	8.826	9.339	7.765	7.217	12.881	17.051	8.351	7.836	5.796	5.978	2.597	2.563
9.868	11.198	8.978	9.428	7.876	7.311	12.764	16.854	8.306	7.803	5.647	5.82	2.716	2.676
16.005	19.106	8.286	7.554	7.176	6.641	12.104	16.06	8.47	7.802	3.919	3.994	2.727	2.686
5.81	6.386	8.297	7.568	7.114	6.595	12.202	16.2	8.794	7.977	3.685	3.755	2.356	2.329
5.914	5.757	8.317	7.595	7.07	6.564	11.345	15.031	8.812	7.982	4.553	4.643	2.36	2.334
13.921	16.525	8.285	7.555	7.11	6.596	11.635	15.402	8.201	7.83	4.112	4.192	2.001	1.905
7.614	8.636	8.296	7.569	6.918	6.462	11.693	15.452	8.211	7.837	3.877	3.951	2.008	1.911
4.082	4.259	8.013	7.328	8.487	8.348	12	15.897	8.166	7.838	4.058	4.135	1.899	1.893
6.881	7.688	7.191	6.614	8.487	8.348	10.812	13.789	8.186	7.849	4.188	4.268	1.909	1.903
11.349	13.258	8.078	7.37	8.457	8.31	11.816	15.139	8.042	7.667	11.452	12.568	3.538	3.415
21.313	25.654	8.336	7.615	8.592	8.511	11.075	14.167	8.03	7.663	11.53	12.607	3.53	3.407
15.266	18.118	8.348	7.624	8.485	8.343	11.684	15.018	8.051	7.671	11.623	12.758	6.545	6.017
20.922	25.148	5.784	5.519	7.41	6.918	10.187	12.908	8.037	7.665	11.746	12.879	10.841	9.297
21.763	26.219	5.776	5.511	7.384	6.92	9.085	10.464	9.021	8.3	7.416	8.134	6.218	5.743
20.676	24.835	5.488	5.238	7.398	6.917	8.946	10.264	8.973	8.275	7.516	8.252	5.037	4.8
20.316	24.395	5.712	5.455	14.668	16.241	9.093	10.478	9.031	8.305	7.956	8.725	5.018	4.789
19.736	23.665	5.545	5.308	10.933	11.939	8.929	10.248	8.931	8.255	8.197	9.006	12.996	10.6
18.199	21.726	5.637	5.389	14.69	18.066	9.39	10.913	8.825	8.199	5.276	5.623	7.775	6.867
14.365	16.977	5.591	5.349	8.982	10.254	9.086	10.505	8.925	8.269	5.353	5.713	7.884	6.95
16.914	20.165	5.648	5.399	7.596	8.431	11.681	15.106	8.952	8.285	5.344	5.702	10.514	8.844
19.929	23.894	5.711	5.454	14.823	17.093	11.53	14.871	8.985	8.306	5.387	5.752	10.626	8.925
19.559	23.452	5.764	5.499	12.443	14.973	11.58	14.94	8.414	7.931	8.238	8.66	10.32	8.748
17.543	21.521	5.56	5.321	11.218	11.791	11.658	15.057	8.264	7.874	8.061	8.475	12.954	10.789
17.92	21.947	5.712	5.455	11.127	11.689	10.688	13.522	8.26	7.54	8.255	8.675	13.02	10.82
17.931	21.959	7.731	7.906	11.385	11.988	11.253	14.12	8.322	7.603	8.229	8.648	5.505	5.161
17.636	21.622	8.068	8.152	16.741	19.557	11.361	14.26	8.329	7.598	8.188	8.615	2.865	2.727
17.607	21.584	7.708	7.896	14.967	17.702	11.4	14.31	8.3	7.579	8.847	9.38	9.305	7.797
17.35	21.26	7.686	7.892	11.838	12.972	12.026	15.869	8.652	8.111	8.317	8.74	9.424	7.89
18.308	22.39	7.192	7.009	14.565	16.156	12.27	16.23	8.791	8.199	8.375	8.81	9.343	7.826
17.786	21.767	6.79	6.624	13.465	15.468	12.202	16.128	8.726	8.158	9.665	10.691	9.42	7.885
17.774	21.744	7.091	6.914	10.243	12.06	8.681	9.905	8.56	8.054	9.712	10.737	2.002	1.905
17.39	21.007	7.145	6.958	10.179	11.973	8.61	9.773	8.471	8	9.783	10.81	10.447	8.778
16.446	20.318	8.87	8.79	10.075	11.846	8.476	9.535	8.848	8.234	9.822	10.855	9.536	8.259
18.259	22.188	9.052	8.934	10.127	11.838	8.807	10.084	8.388	7.942	4.207	4.29	12.831	10.802
17.781	21.265	8.006	8.203	10.327	12.176	8.505	9.599	8.647	8.101	4.207	4.29	12.775	10.757
17.057	21.025	8.859	9.347	10.323	12.174	8.379	9.471	8.18	7.864	4.185	4.268	5.28	4.941
13.604	15.805	8.93	9.383	10.304	12.068	9.519	11.885	7.971	7.752	4.21	4.289	3.283	3.26
14.506	16.973	8.898	9.377	10.259	12.071	8.561	10.443	7.982	7.76	5.909	6.1	7.905	6.965
13.891	16.148	8.949	9.39	9.8	11.465	8.946	11.021	8.001	7.769	6.068	6.261	7.861	6.932
13.683	15.918	11.437	10.427	10.877	11.524	8.119	9.75	7.991	7.763	6.707	6.924	11.701	9.612
13.916	16.214	11.159	10.198	11.041	11.773	12.122	15.505	10.607	8.387	6.703	6.924	12.458	10.19
13.837	16.101	11.669	10.619	11.158	11.923	12.101	15.47	10.503	8.327	3.526	3.567	11.776	9.659
13.14	15.238	11.126	10.186	10.949	11.645	12.158	15.559	10.579	8.37	3.536	3.577	12.403	10.097
16.847	19.529	11.032	10.111	10.856	11.445	18.117	24.354	10.415	8.264	3.685	3.726	11.924	9.801
16.977	19.687	11.088	10.135	10.749	11.426	18.351	24.657	10.655	8.396	3.579	3.633	12.732	10.414
16.834	19.513	10.443	9.537	11.077	11.812	18.079	24.293	7.517	7.219	3.608	3.641	12.47	10.159
16.75	19.41	10.428	9.443	10.605	11.19	18.572	24.929	7.524	7.226	5.104	5.244	12.933	10.581
16.928	19.628	8.703	7.992	11.262	12.065	18.165	24.377	7.497	7.226	4.982	5.112	12.577	10.306
16.68	19.325	7.459	6.957	10.314	10.897	18.067	24.261	7.724	7.288	4.859	4.982	12.55	10.247
10.544	11.915	9.172	8.391	8.687	8.755	18.117	24.32	7.567	7.288	8.801	8.889	12.71	10.399
10.164	11.327	7.316	6.834	8.777	8.794	18.119	24.324	7.812	7.444	8.915	8.946	12.39	10.087
10.606	11.988	11.092	10	8.679	8.74	18.063	24.207	8.12	7.997	8.894	8.944	12.746	10.436
10.614	11.993	8.3	7.649	8.792	8.817	9.748	11.033	8.108	7.986	8.894	8.912	12.387	10.092
10.896	12.387	8.989	8.246	8.769	8.815	9.945	11.244	8.094	7.973	5.788	6.046	12.041	9.848
9.662	11.293	9.025	8.286	8.803	8.881	10.18	11.528	8.097	7.976	5.868	6.146	13.217	10.831
9.746	11.401	8.72	8.02	8.748	8.806	9.523	10.792	8.118	7.995	5.83	6.105	13.278	10.881
9.703	11.352	8.388	7.73	8.794	8.835	9.84	11.215	8.135	8.008	5.858	6.138	9.382	8.561
9.651	11.277	8.597	7.904	8.775	8.79	9.456	10.669	8.687	8.349	8.901	8.701	8.895	8.161
17.488	20.938	8.408	8.747	8.907	9	10.498	11.994	8.707	8.331	8.953	8.799	9.4	8.564
17.546	21.017	8.547	9.009	8.392	8.31	9.248	10.482	8.708	8.339	8.922	8.76	9.143	8.358
17.152	20.512	8.065	8.454	8.34	8.245	10.509	13.485	8.701	8.355	8.504	9.001	9.208	8.417
17.521	20.977	8.364	8.703	8.416	8.333	10.579	13.589	8.127	7.198	8.505	8.985	9.524	8.67
17.307	20.708	8.314	8.589	8.288	8.187	11.817	15.549	8.131	7.201	6.878	7.159	9.373	8.548
17.542	21.008	6.189	5.813	8.526	8.471	11.817	15.549	8.064	7.156	6.874	7.154	7.233	6.558
7.202	8.034	5.979	5.65	8.181	8.14	12.465	15.483	8.159	7.909	6.206	6.458	10.42	8.828
7.211	8.044	6.207	5.828	8.327	8.302	12.847	16.051	8.168	7.911	6.224	6.504	10.305	8.749
7.217	8.052	6.129	5.765	8.198	8.173	10.309	12.224	8.164	7.909	6.412	6.704	10.448	8.848
7.209	8.04	6.066	5.717	8.189	8.152	10.107	11.87	12.487	9.768	4.188	4.282	10.359	8.783
6.773	7.533	5.724	5.444	8.226	8.193	14.295	18.421	12.375	9.719	4.22	4.314	10.017	8.55
7.279	8.197	5.7	5.401	8.031	8.001	14.069	18.002	12.333	9.705	4.594	4.683	10.131	8.629
7.246	8.149	5.674	5.38	8.498	8.488	12.655	15.918	9.16	8.507	4.575	4.663	10.416	8.826
7.259	8.171	5.644	5.355	8.232	8.02	12.458	15.584	9.171	8.513	5.15	5.441	10.306	8.75
7.286	8.192	6.024	5.686	10.705	12.288	12.117	15.306	9.174	8.513	5.179	5.474	10.241	8.705
7.254	8.157	5.627	5.342	10.806	12.41	12.12	15.309	9.748	8.367	4.311	4.394	4.993	4.622
19.571	23.729	5.378	5.093	10.778	12.378	7.66	8.441	9.654	8.308	4.309	4.392	5.088	4.689
20.225	24.515	5.36	5.079	10.701	12.289	7.606	8.364	9.605	8.315	5.843	6.252	4.909	4.565
19.965	24.198	5.322	5.047	10.674	12.258	10.901	12.934	7.855	7.189	6.371	6.849	4.908	4.56
19.624	23.809	5.358	5.08	10.812	12.417	11.028	13.119	7.895	7.248	5.976	6.403	4.952	4.592
17.351	21.968	5.418	5.127	10.827	12.436	9.501	11.232	7.875	7.244	4.909	5.052	4.915	4.568
17.504	22.087	6.263	5.89	9.739	11.462	9.474	11.19	7.782	7.238	4.93	5.074	4.914	4.569
17.466	22.06	5.993	5.683	9.201	10.721	6.462	7.051	7.83	7.245	4.659	4.688	2.62	2.53
12.964	15.528	6.147	5.816	9.276	10.821	6.848	7.579	7.766	7.186	4.732	4.896	2.613	2.519
12.811	15.309	5.982	5.681	9.331	10.894	7.628	8.611	7.782	7.246	4.715	4.878	2.614	2.522
12.873	15.415	6.058	5.748	9.082	10.56	7.547	8.51	8.387	7.611	2.897	2.945	2.627	2.54
10.088	11.726	7.265	7.677	10.13	12.16	9.23	10.861	8.378	7.607	4.191	4.335	2.489	2.396
9.936	11.562	7.315	7.718	10.307	12.396	9.146	10.745	8.373	7.603	2.606	2.656	2.62	2.531
10.181	11.843	7.713	7.71	10.131	12.167	15.987	20.099	7.737	6.898	2.635	2.692	9.456	8.164
9.92	11.534	7.733	7.718	10.207	12.25	15.99	20.101	7.866	7.001	2.71	2.762	4.654	4.39
9.536	10.885	7.766	7.734	8.442	9.73	15.887	19.945	7.871	7.002	1.849	1.874	4.653	4.393
9.533	10.882	7.748	7.727	8.522	9.827	15.785	19.68	7.912	7.03	2.081	2.066	4.695	4.441
9.125	10.382	7.719	7.705	8.765	10.122	15.517	19.307	8.395	8.332	2.653	2.697	7.772	7.468
9.326	10.655	11.879	10.76	8.371	9.641	15.975	20.046	8.379	8.358	5.459	5.663	7.777	7.471
9.435	10.787	12.425	11.226	15.585	18.541	16.087	20.218	8.518	8.492	5.464	5.669	7.718	7.426
9.52	10.868	12.417	11.218	15.597	18.569	16.189	20.341	8.425	8.387	5.458	5.665	7.712	7.423
9.46	10.806	12.433	11.232	15.534	18.471	16.699	21.161	9.312	8.222	4.858	5.015	11.9	10.24
9.495	10.834	8.357	7.695	15.548	18.442	16.642	21.081	9.462	8.338	4.56	4.706	11.801	10.152
9.211	10.503	8.224	7.577	8.191	9.149	14.373	17.713	9.529	8.379	4.738	4.897	11.818	10.171
7.537	8.364	8.314	7.657	8.131	9.089	14.348	17.679	9.397	8.304	4.067	4.217	11.847	10.184
7.813	8.702	8.373	7.764	8.141	9.098	16.877	22.817	9.57	8.398	4.129	4.305	11.501	9.919
8	8.932	8.131	8.3	8.112	9.07	16.541	22.359	9.257	8.206	4.11	4.278	12.055	10.346
7.828	8.72	8.233	8.401	9.419	9.735	19.889	25.724	9.506	9.493	6.675	6.89	6.71	6.307
7.927	8.854	8.181	8.351	9.328	9.604	20.455	26.532	9.408	9.395	6.62	6.833	6.664	6.29
7.864	8.767	7.938	8.111	9.802	10.153	19.171	24.697	8.387	7.64	4.706	4.788	6.72	6.305
7.723	8.589	9.154	8.273	9.075	9.31	16.702	21.815	8.402	7.651	4.303	4.377	6.654	6.267
7.54	8.368	9.157	8.272	9.625	9.985	16.73	21.878	8.346	7.616	4.394	4.493	15.754	12.717
6.661	7.162	9.134	8.254	11.065	11.714	16.495	21.907	8.367	7.626	4.388	4.473	15.487	12.545
6.453	6.932	7.222	6.618	10.997	11.629	16.473	21.861	9.619	9.537	4.382	4.466	15	12.23
6.854	7.367	7.21	6.607	11.093	11.751	15.98	21.099	8.986	8.885	3.21	3.243	15.273	12.408
6.576	7.073	5.373	5.099	9.579	9.86	15.291	20.187	9.548	9.464	3.225	3.259	12.692	10.823
6.652	7.15	5.306	5.039	9.696	10.03	11.785	14.13	9.428	9.254	3.868	3.931	12.494	10.704
6.846	7.357	5.218	4.962	9.651	9.982	11.738	14.091	9.433	9.259	3.907	3.972	12.721	10.843
5.262	5.5	5.207	4.951	9.688	10.06	8.896	11.146	9.356	9.255	3.822	3.895	12.732	10.862
5.133	5.353	7.189	6.668	9.705	10.004	8.792	11.002	8.933	8.286	4.6	4.722	7.798	7.387
5.331	5.535	7.254	6.722	9.431	9.728	9.246	11.613	8.888	8.288	4.733	4.862	7.73	7.322
5.361	5.567	6.807	6.349	8.456	8.407	9.139	11.467	8.91	8.287	4.629	4.752	7.781	7.367
5.185	5.402	6.83	6.373	8.385	8.323	9.184	11.251	8.91	8.287	4.013	4.074	7.721	7.303
7.817	8.633	4.626	4.54	8.416	8.354	9.014	11.059	8.766	8.282	3.964	4.023	9.958	8.534
7.666	8.461	4.615	4.532	8.43	8.371	9.211	11.519	8.759	8.281	3.477	3.521	10.004	8.56
7.67	8.47	4.699	4.588	8.574	8.557	8.816	10.996	8.789	8.323	3.516	3.559	9.998	8.558
7.745	8.554	5.283	5.158	7.385	7.002	8.095	7.399	8.659	7.789	3.482	3.529	10.084	8.603
7.652	8.441	5.274	5.151	7.404	7.015	7.727	7.056	8.677	7.787	3.122	3.13	10.065	8.592
7.635	8.427	5.269	5.146	7.184	6.863	7.717	7.021	7.79	7.011	2.587	2.596	9.977	8.548
7.522	8.588	5.286	5.161	7.262	6.915	11.301	14.799	7.713	6.954	2.696	2.706	10.817	9.04
7.483	8.533	4.549	4.485	8.314	8.321	11.264	14.736	8.158	7.284	4.054	4.114	10.83	9.048
7.491	8.543	4.59	4.523	12.254	13.215	11.21	14.643	8.056	7.214	4.103	4.165	10.707	8.968
7.466	8.508	4.583	4.517	12.369	13.386	11.34	14.868	8.097	7.242	4.765	4.865	10.798	9.032
7.486	8.536	4.465	4.408	12.342	13.35	11.257	14.724	9.592	8.592	4.148	4.224	10.669	8.912
8.173	9.315	4.754	4.662	12.353	13.368	11.226	14.668	9.597	8.593	4.45	4.473	4.774	4.508
8.472	9.697	4.756	4.66	15.19	19.058	11.369	14.726	7.517	7.273	5.833	6.019	4.747	4.493
8.239	9.401	4.755	4.662	15.221	19.101	11.699	15.129	7.436	7.212	5.824	6.008	7.09	6.973
8.271	9.441	4.757	4.659	14.948	18.769	11.576	14.966	9.206	8.295	5.569	5.739	7.136	7.029
8.165	9.306	3.989	3.973	15.333	19.202	11.915	15.443	9.576	8.294	2.933	2.986	7.171	7.058
8.285	9.461	3.982	3.967	9.055	10.531	11.911	15.444	7.876	7.244	8.502	8.977	7.136	7.017
9.748	11.149	3.583	3.586	9.253	10.886	12.214	15.896	10.249	8.774	4.253	4.399	9.907	8.537
9.421	10.777	5.066	4.926	9.215	10.845	11.411	14.318	10.176	8.743	4.16	4.302	9.894	8.541
9.849	11.267	4.961	4.839	9.017	10.573	11.186	13.99	10.155	8.755	11.422	12.471	9.843	8.486
10.071	11.525	5.057	4.918	8.847	10.325	11.306	14.166	10.332	8.871	4.207	4.29	10.157	8.749
9.752	11.155	5.045	4.908	9.161	10.738	15.709	21.258	9.765	8.548	10.521	11.388	12.852	10.702
9.437	10.79	5.032	4.892	8.919	10.434	15.619	21.151	11.584	9.45	10.424	11.279	12.864	10.702
6.397	7.042	5.103	4.96	10.566	12.844	15.74	21.311	10.215	8.762	10.557	11.438	12.869	10.711
6.422	7.042	5.223	5.052	10.449	12.661	15.458	20.991	11.406	9.381	10.27	11.098	12.861	10.711
6.382	7.036	5.162	5	10.704	13.043	15.561	21.055	10.218	8.768	10.43	11.284	11.039	9.812
7.094	7.355	4.499	4.501	10.768	13.138	15.828	21.398	13.499	10.28	10.3	11.131	11.279	10.017
7.623	8.731	4.497	4.499	15.457	18.781	13.41	17.47	8.51	8.156	10.706	11.612	11.204	9.959
7.662	8.78	4.495	4.497	15.206	18.444	14.375	19.023	8.511	8.155	9.729	10.466	11.203	9.958
7.68	8.801	5.07	4.921	15.317	18.556	14.371	19.047	8.802	8.37	10.249	11.131	11.792	10.434
7.677	8.798	5.066	4.915	15.038	18.275	14.616	19.461	8.838	8.426	11.111	12.097	11.576	10.262
7.622	8.721	6.351	5.938	15.176	18.427	7.461	8.81	8.443	8.096	10.682	11.579	11.657	10.326
7.51	8.592	14.075	12.598	15.192	18.446	7.448	8.794	9.068	8.454	10.104	10.904	11.676	10.34
5.943	6.301	11.553	10.4	15.104	18.347	9.781	12.399	8.901	8.455	10.721	11.631	11.508	9.435
5.957	6.317	5.685	5.431	12.021	13.432	14.243	19.101	8.112	7.915	8.197	8.654	11.494	9.421
5.957	6.313	14.762	13.347	12.014	13.462	14.629	19.65	8.427	8.071	8.086	8.525	11.499	9.425
5.902	6.253	13.675	12.402	11.973	13.358	14.364	19.275	8.462	8.104	6.606	6.964	11.534	9.448
5.898	6.254	13.017	11.841	12.125	13.637	12.286	16.042	9.201	8.552	8.515	9.005	11.506	9.429
8.989	10.246	13.718	12.446	12.123	13.587	12.231	15.949	8.399	8.078	8.314	8.786	10.111	8.392
9.089	10.368	14.448	13.065	15.842	20.709	11.256	14.29	8.288	8.005	4.351	4.498	10.343	8.561
9.144	10.434	14.182	12.838	15.823	20.683	11.216	14.232	8.772	8.291	4.4	4.55	10.353	8.575
8.042	9.095	13.595	12.337	15.965	20.863	11.248	14.294	8.395	7.99	4.327	4.473	10.421	8.621
7.99	9.035	13.762	12.478	16.01	20.921	12.995	17.327	9.715	8.468	3.735	3.846	10.355	8.585
8.13	9.202	13.882	12.583	13.083	15.551	12.994	17.325	9.848	8.539	6.354	6.615	8.569	7.69
8.025	9.087	13.777	12.494	13.126	15.628	13.09	17.461	9.937	8.59	7.128	7.446	8.448	7.595
7.821	8.719	14.784	13.364	13.073	15.525	13.157	17.555	9.286	8.296	6.981	7.292	8.479	7.624
7.738	8.6	8.358	8.698	9.203	9.548	10.133	12.328	9.246	8.27	6.802	7.101	8.416	7.57
7.57	8.381	8.418	8.772	9.1	9.434	10.084	12.246	9.25	8.209	7.158	7.475	7.84	7.136
6.983	7.679	8.101	8.515	9.203	9.546	14.296	19.138	9.282	8.17	7.02	7.329	7.77	7.096
6.985	7.677	8.032	8.413	9.38	9.748	14.49	19.447	9.266	8.15	3.94	4.018	7.82	7.122
5.311	5.484	7.937	8.348	9.231	9.578	14.386	19.293	9.03	8.31	3.713	3.785	7.846	7.139
5.238	5.405	8.051	8.504	10.21	10.525	14.677	19.508	9.045	8.319	4.489	4.582	9.837	8.719
5.299	5.47	8.868	9.411	11.735	12.291	14.824	19.715	8.961	8.313	4.117	4.2	9.764	8.67
7.873	8.042	7.792	8.036	11.544	12.048	14.69	19.532	9.005	8.345	3.891	3.968	9.853	8.734
7.795	7.925	7.324	7.636	11.076	11.519	10.269	11.337	8.761	8.019	4.101	4.183	9.995	8.831
7.908	8.092	6.916	7.204	11.966	12.872	10.033	11.017	8.734	8.007	4.111	4.191	9.928	8.787
4.1	4.333	10.526	9.533	12.019	12.947	10.292	11.353	8.738	8.002	10.476	11.336	2.284	2.178
4.106	4.345	10.591	9.591	12.179	13.16	10.597	11.605	8.747	8.013	10.243	11.058	2.273	2.165
5.13	5.432	11.017	9.973	12.071	13.007	10.04	11.055	10.109	8.88	10.57	11.444	2.27	2.161
4.966	5.227	10.724	9.709	9.886	10.309	6.218	6.204	10.05	8.851	10.555	11.426	3.203	3.082
4.764	4.982	10.804	9.781	9.732	10.138	6.22	6.204	10.107	8.871	7.491	8.106	3.2	3.079
6.847	7.565	11.399	10.31	10.096	10.545	6.201	6.186	10.03	8.86	7.663	8.297	6.183	5.602
6.539	7.202	10.573	9.585	12.471	13.388	6.303	6.289	9.915	8.811	8.227	8.869	6.235	5.634
6.545	6.304	10.648	9.644	12.525	13.453	6.625	6.575	9.77	8.743	8.552	9.235	6.219	5.617
6.578	6.335	11.142	10.087	12.575	13.512	6.584	6.523	9.846	8.787	5.722	6.13	6.222	5.621
6.41	6.223	10.882	9.857	12.443	13.356	6.576	6.508	9.883	8.802	5.804	6.224	6.227	5.625
3.317	3.444	5.591	5.341	12.991	14.143	6.58	6.519	9.247	8.526	5.79	6.209	6.029	5.514
3.312	3.438	5.635	5.378	12.868	13.975	6.023	5.808	8.441	8.024	5.843	6.267	6.1	5.564
4.761	4.885	5.086	4.908	10.269	10.734	6.033	5.81	8.222	7.4	6.207	6.549	6.162	5.607
4.783	4.908	5.524	5.283	10.423	10.904	6.05	5.805	8.405	7.537	6.048	6.378	6.121	5.579
4.803	4.929	5.554	5.306	9.205	9.608	6.06	5.791	8.37	7.5	6.228	6.569	6.429	5.838
3.722	3.718	5.555	5.309	9.19	9.589	6.699	6.794	8.333	7.477	6.202	6.542	10.067	8.618
3.722	3.718	5.526	5.283	9.372	9.792	6.77	6.888	8.842	8.247	6.154	6.496	10.039	8.604
7.495	8.548	5.519	5.278	9.33	9.742	6.798	6.924	8.994	8.355	6.844	7.253	10.069	8.63
18.653	22.155	5.554	5.309	13.096	14.009	9.704	11.471	8.927	8.306	6.293	6.638	9.981	8.573
17.163	21.039	5.344	5.134	13.387	14.321	9.673	11.371	8.782	8.19	6.345	6.697	8.559	7.728
17.546	21.523	5.532	5.285	13.304	14.229	9.643	11.318	8.733	8.139	9.477	10.275	8.543	7.714
13.914	16.204	5.468	5.237	6.333	5.849	9.609	11.257	9.041	8.394	9.52	10.32	8.134	7.069
9.069	10.344	7.492	7.653	6.372	5.878	9.683	11.395	8.547	8.037	9.644	10.457	8.129	7.064
7.877	8.895	7.651	7.775	8.185	7.824	7.034	7.045	8.793	8.22	9.792	10.624	7.729	7.022
6.985	7.676	7.473	7.647	8.194	7.901	7.541	7.62	8.751	8.383	5.258	5.456	7.577	6.899
19.828	24.034	7.438	7.637	8.175	7.878	7.496	7.569	8.485	8.247	5.259	5.455	7.342	6.711
17.59	21.57	6.336	6.239	8.162	7.86	7.483	7.557	8.5	8.259	5.233	5.427	7.395	6.75
7.669	8.463	6.198	6.092	8.172	7.87	7.453	7.521	8.522	8.27	4.161	4.244	5.455	5.372
8.118	9.245	6.293	6.198	8.18	7.877	7.329	7.464	8.509	8.263	6.981	7.272	5.467	5.383
17.887	21.909	6.342	6.24	7.628	7.122	7.566	7.729	10.193	8.065	7.178	7.456	6.849	6.059
6.518	7.178	8.2	8.263	7.737	7.18	7.58	7.736	10.07	7.995	7.641	7.906	6.857	6.067
6.62	6.364	8.164	8.224	7.699	7.163	7.515	7.66	10.163	8.046	7.59	7.861	5.385	5.364
18.368	22.318	7.461	7.711	7.524	6.995	7.523	7.666	10.001	7.938	4.051	4.1	5.388	5.367
7.095	7.357	7.513	7.923	7.576	7.028	7.386	7.774	10.325	8.111	4.067	4.117	5.372	5.352
4.119	4.359	7.525	7.888	8.944	8.947	7.574	7.983	7.429	7.099	4.12	4.165	4.748	4.689
7.22	8.054	7.533	7.934	8.828	8.81	7.534	7.934	7.432	7.102	3.359	3.395	4.753	4.698
9.53	10.879	7.525	7.873	8.761	8.733	7.517	7.913	7.382	7.091	3.992	4.025	4.777	4.74
17.899	21.149	10.1	9.448	8.904	8.9	7.464	7.852	7.718	7.183	4.793	4.915	4.807	4.767
10.091	11.545	9.644	9.064	8.831	8.813	8.307	7.342	7.378	7.1	4.725	4.842	5.159	4.954
16.115	18.922	10.489	9.777	6.974	6.696	8.324	7.334	7.469	7.14	4.653	4.765	5.154	4.953
18.462	21.84	9.654	9.087	6.872	6.583	8.329	7.326	8.753	8.586	7.161	7.461	5.226	4.868
15.419	18.058	9.513	8.971	6.868	6.579	8.349	7.327	8.7	8.539	7.555	7.896	5.111	4.784
15.618	18.319	9.508	8.945	6.843	6.56	8.378	7.351	8.658	8.501	7.436	7.764	5.128	4.794
14.246	16.618	8.446	7.978	6.831	6.545	7.608	7.805	8.656	8.499	7.609	7.957	4.913	4.63
12.954	15.052	13.944	12.625	7.632	7.022	7.581	7.764	8.751	8.585	6.345	6.647	4.914	4.626
9.585	10.968	12.71	11.596	7.925	7.271	7.589	7.781	8.674	8.512	6.398	6.718	5.125	5.058
10.778	12.364	11.207	10.266	7.664	7.051	7.624	7.834	8.929	8.5	6.392	6.71	5.131	5.061
13.712	15.946	12.545	11.418	7.947	7.282	7.508	7.608	8.843	8.381	6.393	6.714	6.5	6.465
15.496	18.178	11.256	10.322	8.047	7.368	7.502	7.602	8.787	8.346	9.195	9.837	6.305	6.254
21.116	25.38	14.941	13.486	8.209	7.471	7.482	7.582	8.706	8.305	9.245	9.904	5.182	5.164
21.99	26.444	8.019	7.486	8.142	7.416	7.493	7.593	8.339	7.166	9.284	9.942	5.186	5.167
21.952	26.396	8.492	7.915	8.093	7.377	7.506	7.607	8.347	7.171	6.513	6.742	5.138	5.134
21.5	25.851	8.361	7.809	8.136	7.413	7.72	8.077	8.276	7.132	6.489	6.71	5.141	5.136
21.509	25.856	8.108	7.582	7.873	7.205	7.56	7.929	7.473	7.353	6.806	7.163	4.149	4.135
21.041	25.285	7.813	7.317	8.216	7.9	7.541	7.908	7.472	7.349	6.803	7.16	4.128	4.114
22.723	27.332	8.312	7.747	8.216	7.9	7.574	7.945	7.47	7.347	5.076	5.33	2.811	2.776
21.953	26.366	7.89	8.033	8.208	7.888	7.55	7.919	13.578	10.301	5.753	6.08	2.812	2.777
21.976	26.378	7.447	7.789	8.217	7.95	7.299	8.024	13.409	10.207	5.486	5.795	2.76	2.717
23.202	27.31	7.589	7.828	8.214	7.896	7.35	8.081	13.371	10.192	4.983	5.191	2.763	2.721
18.064	21.366	7.876	8.022	8.468	7.663	7.4	8.138	9.051	8.325	5.042	5.255	1.965	1.92
23.463	28.017	8.214	8.269	8.46	7.661	7.45	8.194	9.07	8.339	4.445	4.556	1.962	1.919
24.75	29.166	6.733	6.31	8.461	7.661	8.944	8.343	9.07	8.338	4.443	4.555	1.987	1.905
18.106	21.668	6.758	6.334	10.267	10.732	16.146	21.902	11.056	8.973	5.502	5.858	1.993	1.91
14.209	16.749	7.401	6.896	12.435	13.346	16.103	21.858	10.83	8.837	5.523	5.882	2.351	2.348
15.309	18.148	6.529	6.13	10.494	12.73	11.172	13.854	11.044	9.02	4.212	4.299	2.363	2.36
15.686	18.563	7.037	6.577	10.77	12.369	14.46	18.133	8.106	7.216	4.208	4.295	3.177	3.134
13.923	16.407	6.302	5.934	8.174	9.132	15.273	19.64	8.143	7.268	6.173	6.675	3.171	3.128
14.426	17.035	5.245	5.008	8.948	10.393	11.429	14.796	8.095	7.253	6.424	6.938	6.7	6.294
14.709	17.373	5.246	5.01	15.164	18.386	12.427	16.28	7.77	7.153	6.279	6.787	9.526	8.672
12.257	14.344	5.248	5.013	8.478	8.434	11.513	14.846	7.745	7.119	4.754	5.001	7.33	6.703
19.796	23.179	5.223	5.008	8.398	8.337	11.654	15.048	7.815	7.145	4.774	5.022	4.646	4.386
19.814	23.21	5.248	5.015	8.419	8.354	13.112	16.977	7.767	7.157	4.508	4.7	4.663	4.404
19.748	23.123	4.118	4.061	9.33	10.893	16.006	20.499	8.443	7.603	5.015	5.215	11.524	9.443
19.616	22.966	4.125	4.069	10.076	12.089	14.448	19.389	8.425	7.589	4.978	5.175	7.739	7.07
19.758	23.143	4.14	4.082	9.083	9.413	8.053	7.355	8.416	7.582	2.674	2.715	7.801	7.109
19.699	23.055	4.127	4.072	10.634	11.224	13.291	16.913	8.032	7.287	4.37	4.519	12.61	10.314
9.174	10.41	4.095	4.04	8.591	9.912	8.465	10.086	8.226	7.447	2.875	2.934	12.35	10.117
9.606	10.685	5.413	5.179	12.344	14.651	13.052	17.273	8.229	7.451	2.718	2.752	13.254	10.861
9.627	10.801	5.546	5.278	12.365	14.658	16.489	21.789	8.272	7.492	3.024	3.077	12.595	10.781
9.601	10.777	5.523	5.252	12.36	14.638	7.805	8.91	9.369	9.224	2.011	1.977	12.718	10.837
9.604	10.824	5.553	5.287	12.54	14.802	19.949	26.125	8.929	8.879	2.014	2.001	5.092	4.772
13.738	16.39	5.527	5.268	12.324	14.649	20.337	26.567	9.143	9.078	2.291	2.321	3.17	3.055
13.795	16.481	7.79	7.696	12.318	14.644	10.043	12.383	9.187	9.093	5.869	6.201	10.071	8.621
13.639	16.276	7.737	7.653	12.485	14.776	11.758	14.848	9.688	8.435	5.853	6.186	10.064	8.623
13.721	16.368	9.209	9.097	12.364	14.67	11.908	15.071	9.74	8.469	5.823	6.156	10.057	8.614
16.088	19.155	9.403	9.26	12.497	14.716	7.743	8.776	9.825	8.522	5.386	5.729	9.997	8.581
16.152	19.233	9.722	9.529	9.572	9.791	8.352	9.8	9.619	8.393	4.757	5.04	1.99	1.907
15.91	18.927	9.53	9.367	9.389	9.632	18.92	24.862	9.925	8.584	5.303	5.651	12.542	10.243
16.08	19.146	9.357	9.221	9.145	9.368	8.504	10.357	9.53	8.336	4.484	4.751	8.728	8.006
15.98	19.018	10.947	10.124	9.539	9.784	7.865	8.238	9.923	9.91	4.546	4.808	11.637	10.31
16.127	19.204	11.68	10.761	9.416	9.572	8.677	9.376	9.844	9.831	4.521	4.781	11.695	10.354
9.439	10.736	11.656	10.739	10.224	10.571	9.053	10.455	8.857	7.845	5.97	6.137	4.998	4.626
9.428	10.722	11.68	10.76	9.284	9.511	11.154	14.659	8.856	7.841	5.904	6.07	4.154	4.14
9.469	10.771	12.833	11.848	10.182	10.463	11.19	14.718	8.835	7.838	5.335	5.45	7.813	7.116
9.373	10.653	12.437	11.489	8.971	9.19	15.33	20.008	8.861	7.851	4.749	4.845	7.787	7.106
8.91	10.106	12.776	11.796	11.205	11.677	9.04	10.823	9.92	9.838	4.03	4.109	14.532	12.609
7.091	7.792	12.702	11.76	10.458	10.668	16.142	21.91	9.282	9.167	4.384	4.471	14.885	12.881
7.103	7.832	7.653	7.514	10.699	10.916	14.293	18.924	9.858	9.772	4.379	4.466	14.67	12.735
7.095	7.802	7.892	7.718	10.332	10.511	11.669	15.093	9.931	9.697	3.747	3.798	15.409	13.4
7.105	7.872	7.788	7.626	10.499	10.669	26.969	37.08	9.942	9.708	3.765	3.817	14.658	12.626
7.106	7.85	7.246	7.16	10.11	10.207	26.547	36.372	9.829	9.696	3.829	3.884	14.641	12.68
23.664	28.375	9.726	8.854	10.826	11.099	25.88	35.489	9.231	8.438	3.876	3.932	15.185	13.202
23.768	28.481	9.801	8.914	10.348	10.512	26.518	36.342	9.193	8.434	4.365	4.481	14.035	12.178
23.579	28.256	9.744	8.868	10.037	10.109	25.782	35.292	9.21	8.435	5.358	5.538	14.787	12.735
24.133	28.96	8.689	7.938	10.221	10.324	23.199	31.689	9.217	8.435	5.558	5.75	14.988	13.002
13.523	16.426	8.72	7.964	11.316	11.686	26.772	36.762	9.085	8.471	5.36	5.54	14.645	12.676
13.585	16.476	5.824	5.493	9.377	9.3	22.801	30.782	9.034	8.427	4.576	4.663	15.421	13.412
13.582	16.475	5.813	5.478	9.298	9.205	26.277	35.975	9.105	8.509	4.572	4.661	14.573	12.594
12.261	15.057	5.711	5.373	9.43	9.358	25.298	34.476	8.25	7.487	4.156	4.265	15.37	13.363
12.324	15.112	5.688	5.353	9.207	9.101	20.372	28.362	8.261	7.485	4.198	4.308	15.016	13.033
12.28	15.091	6.776	6.304	9.594	9.556	19.881	27.617	7.554	6.809	4.112	4.221	13.952	12.074
13.218	15.725	6.438	6.016	9.134	9.095	20.226	28.138	7.498	6.765	3.591	3.603	13.842	11.991
13.395	15.959	6.452	6.051	9.333	9.313	19.464	26.881	8.013	7.211	2.764	2.771	13.864	12.49
13.372	15.92	6.422	6.024	9.189	9.171	19.972	27.662	7.864	7.111	2.845	2.854	12.36	11.457
13.252	15.775	4.32	4.272	9.153	9.121	20.419	28.427	7.924	7.151	4.11	4.169	13.328	12.157
9.371	10.713	4.329	4.282	9.203	9.173	18.697	25.819	9.323	8.291	4.153	4.212	12.866	11.82
9.348	10.684	4.251	4.196	8.98	8.96	18.87	25.98	9.315	8.285	4.598	4.695	13.14	12.003
8.978	10.234	4.402	4.307	9.543	9.537	21.175	29.55	7.211	7.045	4.135	4.218	13.716	12.423
9.585	10.994	4.392	4.298	9.424	9.331	19.808	26.855	7.168	7.015	4.313	4.493	13.419	12.209
9.365	10.708	4.386	4.292	11.965	13.988	21.589	29.453	10.193	8.767	7.086	7.404	10.194	9.011
9.337	10.671	4.406	4.31	11.975	14.003	21.332	29.09	10.93	8.947	7.138	7.456	10.335	8.74
9.246	10.559	3.958	3.906	12	14.034	22	30.074	8.097	7.254	6.916	7.221	10.342	8.744
9.253	10.568	4.001	3.946	12.075	14.128	21.146	28.806	13.213	10.462	3.117	3.179	10.301	8.715
9.445	10.824	4.008	3.955	12.115	14.178	20.215	27.461	12.782	10.233	6.49	6.71	10.31	8.725
7.259	8.031	3.855	3.81	11.966	13.992	22.36	30.575	12.386	10.086	4.357	4.504	10.405	8.79
7.504	8.328	4.072	4.014	11.992	14.025	23.853	32.788	12.867	10.463	4.314	4.46	10.372	8.766
7.714	8.581	4.09	4.03	12.349	14.575	33.126	46.282	10.708	9.071	10.084	10.871	10.343	8.747
7.426	8.235	4.075	4.015	12.19	14.325	32.908	45.97	15.27	11.769	5.258	5.455	10.347	8.749
7.853	8.748	4.101	4.039	12.261	14.415	32.602	45.514	12.989	10.349	19.001	21.014	10.346	8.747
7.622	8.47	3.469	3.438	12.325	14.494	33.418	46.718	13.602	10.942	16.786	18.553	5.906	5.473
7.183	7.942	3.466	3.436	12.185	14.316	32.402	45.234	12.944	10.339	15.842	17.506	5.977	5.531
7.334	8.123	3.364	3.358	12.325	15.039	9.341	11.142	14.943	11.678	17.273	19.091	5.877	5.449
7.532	8.12	4.373	4.266	12.382	15.13	9.524	11.424	7.567	7.295	17.608	19.466	5.833	5.415
7.479	8.086	4.272	4.179	12.344	15.078	9.374	11.048	7.576	7.298	18.078	19.984	5.874	5.448
7.498	8.043	4.361	4.255	12.303	14.986	9.189	10.832	7.805	7.542	18.389	20.355	5.849	5.428
7.566	8.177	4.353	4.249	10.882	12.672	14.733	19.699	7.681	7.526	16.297	17.99	5.862	5.438
7.505	8.087	4.307	4.207	10.997	12.812	14.114	18.751	7.69	7.353	11.98	13.369	2.261	2.176
7.503	8.055	4.323	4.23	11.343	13.237	14.386	19.162	8.695	7.992	15.56	17.196	2.262	2.174
7.101	7.611	4.472	4.36	10.841	12.618	14.04	18.637	7.818	7.606	19.341	21.406	2.257	2.174
7.008	7.52	4.432	4.326	13.021	15.681	14.281	18.998	7.581	7.367	16.052	17.735	2.264	2.178
6.088	6.419	4.325	4.324	12.992	15.648	14.181	18.841	7.936	7.529	16.373	18.095	2.194	2.119
6.164	6.496	4.319	4.317	13.032	15.692	14.133	18.791	7.78	7.416	6.559	6.893	2.258	2.177
6.815	7.283	4.31	4.309	13.144	15.823	21.954	30.331	8.731	8.056	6.58	6.91	9.543	8.191
9.101	10.196	5.142	4.94	11.458	13.187	21.875	30.224	7.53	7.445	5.689	5.967	5.984	5.574
8.917	9.997	5.182	4.974	11.739	13.523	22.219	30.71	7.506	7.454	6.478	6.805	5.999	5.587
8.912	10.004	7.15	6.673	11.694	13.474	21.871	30.217	7.782	7.585	6.514	6.847	6.054	5.636
9.001	10.094	13.261	12.061	11.834	13.638	22.027	30.31	7.895	7.746	4.175	4.343	8.739	8.943
8.903	9.964	14.817	13.381	10.05	10.303	25.537	35.426	10.914	9.014	4.231	4.404	8.758	8.952
8.882	9.963	5.518	5.278	10.484	10.726	23.764	32.868	11.533	9.383	4.065	4.22	8.616	8.786
8.421	9.768	7.591	7.181	10.721	11.051	21.698	29.847	11.92	9.627	3.923	4.077	8.598	8.78
8.376	9.716	7.388	7.019	10.372	10.568	25.804	35.845	8.958	7.99	6.194	6.611	11.899	10.817
8.334	9.661	7.366	7.005	9.942	10.247	25.689	35.673	8.885	7.931	7.216	7.77	11.695	10.633
8.359	9.696	7.74	7.323	11.222	11.449	22.3	30.749	8.78	7.7	7.056	7.578	11.74	10.679
8.397	9.742	7.539	7.145	11.238	11.469	26.204	36.354	9.429	7.889	6.834	7.328	11.769	10.686
9.9	11.5	7.698	7.283	11.188	11.404	22.672	31.194	9.411	7.851	7.201	7.747	11.166	10.209
10.373	12.092	7.561	7.169	11.607	12.001	22.648	31.152	8.223	7.782	7.042	7.562	12.193	11.029
10.003	11.631	7.491	7.108	11.462	11.82	23.412	32.212	8.249	7.799	4.66	4.766	7.488	6.652
10.055	11.694	7.654	7.247	11.429	11.781	22.995	31.643	8.103	7.77	4.407	4.509	7.343	6.52
9.888	11.485	7.678	7.269	11.24	11.555	21.573	29.664	8.136	7.795	5.264	5.382	7.486	6.65
10.071	11.717	8.045	7.572	11.65	12.045	23.978	33.02	7.968	7.449	4.857	4.968	7.459	6.639
8.474	9.632	6	6.062	11.335	11.681	23.139	31.841	7.919	7.429	4.606	4.711	16.49	14.151
7.821	8.818	6.015	6.079	12.148	12.589	22.89	31.603	7.988	7.468	4.838	4.946	16.07	13.827
8.619	9.811	5.968	6.037	11.989	12.408	23.213	32.077	7.946	7.44	4.689	4.788	15.304	13.233
8.917	10.177	5.952	6.015	12.23	12.674	23.551	32.738	11.106	9.537	18.924	20.953	15.733	13.568
8.447	9.598	5.943	6.01	12.249	12.697	23.921	33.21	10.988	9.457	19.01	21.027	14.048	12.637
7.993	9.037	5.962	6.037	12.423	12.873	23.705	32.659	11.177	9.57	19.461	21.542	13.923	12.55
5.473	5.876	6.085	6.177	8.835	7.917	23.614	32.784	10.822	9.37	19.82	21.927	14.061	12.646
5.498	5.879	5.916	5.96	8.81	7.87	12.885	16.764	10.487	9.162	7.854	8.777	14.086	12.665
5.519	5.933	5.78	5.832	9.228	8.502	13.008	16.947	10.177	8.783	8.023	8.97	9.437	9.354
5.458	5.498	5.706	5.753	8.961	8.077	12.901	16.783	10.303	8.861	9.34	10.384	9.387	9.273
11.497	13.346	7.776	7.18	9.406	9.431	13.73	18.078	10.365	8.893	9.814	10.923	9.448	9.346
11.556	13.416	8.027	7.391	12.148	14.658	12.835	16.687	9.111	8.224	6.175	6.865	9.446	9.295
11.546	13.406	8.52	7.799	12.022	14.486	14.284	18.617	8.188	7.642	6.283	6.981	12.515	11.287
11.525	13.381	7.891	7.273	12.136	14.645	14.341	18.666	6.885	6.218	6.276	6.977	12.555	11.306
11.957	13.899	8.111	7.457	12.13	14.637	14.654	19.165	7.138	6.397	6.324	7.021	12.626	11.345
11.452	13.287	8.139	7.465	11.846	14.711	14.249	18.478	7.096	6.345	8.164	8.955	12.579	11.314
6.909	7.485	8.578	7.806	11.858	14.729	12.235	15.768	6.99	6.285	7.937	8.687	12.506	11.277
6.921	7.502	7.499	6.941	11.759	14.583	12.225	15.75	11.327	9.909	8.208	9.008	12.675	11.374
6.901	7.469	8.776	8.012	11.891	14.761	12.249	15.792	11.54	10.005	8.167	8.959	9.369	8.046
6.88	7.448	8.744	7.991	11.449	13.415	12.215	15.733	11.427	9.951	8.062	8.835	9.351	8.031
6.897	7.477	5.835	5.541	11.364	13.347	11.135	14.066	11.059	9.764	9.219	10.17	9.432	8.095
8.715	9.907	5.841	5.545	11.311	13.284	9.562	11.669	10.781	9.611	8.328	9.149	9.439	8.098
8.821	10.036	4.997	4.816	11.102	12.992	7.38	8.068	11.662	10.066	8.392	9.223	9.06	7.809
8.906	10.142	5.734	5.454	10.839	12.664	12.182	15.62	10.93	9.736	11.651	13.025	5.59	5.243
13.644	15.817	5.608	5.343	11.365	13.322	10.284	12.77	11.375	9.934	11.743	13.117	5.587	5.244
13.874	16.13	5.685	5.411	10.941	12.794	11.105	14.02	8.742	8.304	11.98	13.368	7.375	7.746
13.441	15.546	5.626	5.361	12.146	14.856	11.239	14.215	8.552	8.299	12.224	13.633	7.407	7.785
13.987	16.291	5.672	5.401	12.076	14.693	10.858	13.636	8.562	8.308	4.245	4.389	7.514	7.9
6.88	7.621	5.749	5.467	12.214	15.002	13.558	17.634	8.586	8.32	4.23	4.373	7.483	7.864
6.871	7.606	5.641	5.379	12.247	15.074	11.615	14.769	8.574	8.313	4.224	4.367	11.963	11.068
6.682	7.377	5.478	5.217	12.202	14.71	9.667	11.835	8.601	7.129	4.271	4.344	11.962	11.085
9.428	10.749	5.695	5.422	12.232	14.74	14.061	17.961	8.521	7.081	7.058	7.578	11.96	11.056
9.397	10.709	8.576	8.182	12.264	14.774	12.581	16.075	8.582	7.116	7.181	7.698	11.983	11.131
7.248	7.582	8.743	8.306	11.696	14.154	13.934	17.918	8.506	7.053	7.524	8.102	13.256	12.05
7.148	7.476	8.647	8.244	11.738	14.189	13.293	17.106	8.914	7.279	7.51	8.087	13.211	12.017
7.263	7.595	8.817	8.392	11.743	14.195	13.118	16.761	7.358	7.042	4.538	4.606	13.242	12.04
7.644	7.659	5.775	5.748	11.716	14.17	13.379	17.199	7.354	7.042	4.568	4.637	13.271	12.061
7.699	7.684	5.621	5.592	11.961	14.107	12.954	16.656	7.278	7.004	4.573	4.638	11.559	10.696
7.585	7.609	5.731	5.704	11.911	14.044	7.508	8.216	7.629	7.12	4.512	4.604	12.144	11.175
4.446	4.583	5.762	5.733	11.969	14.102	7.649	8.409	7.23	6.961	4.147	4.182	12.057	11.098
4.457	4.591	10.596	9.696	11.893	14.054	8.047	8.946	7.302	6.954	4.685	4.785	12.043	11.086
6.372	6.901	10.264	9.428	11.94	14.113	7.589	8.336	8.211	8.03	4.592	4.686	14.141	12.852
6.085	6.531	10.342	9.515	15.887	20.938	13.082	16.715	8.282	8.087	4.51	4.6	14.067	12.778
5.946	6.357	8.826	8.246	15.917	20.982	11.87	14.924	8.33	8.128	7.332	8.092	14.046	12.765
6.725	7.396	9.032	8.393	15.766	20.747	11.922	15.011	8.339	8.133	7.674	8.477	13.983	12.714
6.507	7.14	8.872	8.28	15.704	20.655	12.13	15.637	8.208	8.029	7.57	8.362	14.318	12.197
5.588	5.294	9.102	8.442	11.236	13.438	11.968	15.39	8.384	8.158	7.729	8.535	14.195	12.126
5.578	5.286	7.986	7.573	11.247	13.461	12.108	15.602	9.729	8.802	6.787	7.427	14.213	12.136
5.433	5.156	7.966	7.56	11.226	13.421	17.79	23.737	9.637	8.67	6.854	7.512	14.278	12.175
3.624	3.792	8.016	7.595	10.527	10.717	17.993	24.074	9.542	8.609	6.846	7.502	14.204	12.132
3.645	3.815	8.099	7.668	10.344	10.507	9.747	11.778	9.391	8.528	6.855	7.514	12.014	10.209
6.57	6.831	8.104	7.673	10.502	10.699	10.826	13.269	8.886	7.436	7.937	8.984	12.374	10.475
6.611	6.874	7.919	7.523	10.838	11.096	10.416	12.688	8.877	7.432	8.085	9.194	12.462	10.543
6.65	6.915	7.19	6.921	10.572	10.772	14.292	17.976	8.724	7.345	8.117	9.225	12.533	10.594
3.735	3.707	7.303	6.934	9.725	11.002	13.251	16.548	7.063	6.93	6.082	6.887	12.553	10.613
3.738	3.709	7.34	6.948	10.615	12.049	14.067	17.641	7.062	6.925	6.084	6.893	7.768	7.366
8.33	9.656	6.853	6.53	10.493	11.89	7.53	8.099	7.064	6.927	5.387	5.613	7.65	7.265
26.465	31.271	7.021	6.684	10.298	11.672	7.517	8.062	14.874	11.148	5.384	5.61	7.692	7.304
20.404	24.301	6.976	6.632	11.543	13.553	7.527	8.089	14.711	11.047	6.021	6.407	7.621	7.239
21.188	25.469	7.537	7.139	11.519	13.509	7.301	7.682	14.65	11.012	6.41	6.778	8.827	8.379
14.677	17.339	5.681	5.534	11.634	13.665	7.323	7.707	9.975	8.732	6.234	6.608	8.665	8.281
8.864	10.092	5.874	5.712	11.656	13.714	7.333	7.72	9.952	8.72	4.469	4.629	8.781	8.348
14.061	16.376	5.896	5.734	10.755	10.986	6.824	7.161	9.945	8.713	4.48	4.641	8.842	8.387
9.387	10.697	5.805	5.652	10.821	11.062	6.831	7.174	13.741	10.55	4.215	4.302	12.521	11.615
23.588	28.272	5.702	5.56	10.699	10.935	6.799	7.118	13.42	10.328	4.215	4.301	12.471	11.581
21.434	25.772	5.765	5.609	10.388	11.404	14.722	18.889	13.987	10.754	6.058	6.505	12.571	11.652
8.923	9.996	9.748	8.969	10.441	11.362	16.06	20.912	8.104	7.208	6.075	6.525	12.683	11.728
9.815	11.393	9.085	8.446	10.421	11.433	16.013	20.853	8.121	7.251	4.521	4.603	12.644	11.703
21.941	26.385	10.043	9.224	10.379	11.392	15.733	20.461	8.067	7.229	4.518	4.6	2.276	2.2
6.495	7.127	9.819	9.027	9.575	10.139	15.953	20.758	7.699	7.072	7.134	7.902	2.248	2.177
5.612	5.316	10.104	9.258	9.555	10.084	16.508	21.658	7.655	7.023	7.482	8.281	2.238	2.17
23.614	28.218	5.094	4.882	10.541	10.73	15.968	20.754	7.739	7.063	7.221	7.998	2.935	2.79
5.451	5.491	5.184	4.943	10.458	10.624	15.655	20.27	7.698	7.078	4.827	5.023	2.935	2.79
4.459	4.583	5.317	5.057	10.335	10.591	15.195	19.596	8.025	7.055	4.826	5.023	6.406	5.617
9.452	10.75	5.057	4.852	10.319	10.574	15.135	19.529	7.994	7.035	4.769	4.982	6.508	5.687
9.347	10.683	5.254	5.002	10.603	10.896	8.456	9.408	7.98	7.024	6.069	6.376	6.43	5.63
15.344	18.176	5.111	4.876	10.573	10.864	8.555	9.539	8.085	7.221	6.047	6.353	6.45	5.645
9.028	10.375	4.71	4.517	10.454	12.182	8.251	9.096	8.513	7.561	3.558	3.657	6.459	5.651
14.119	16.627	4.723	4.53	10.403	12.105	7.666	8.308	8.511	7.561	4.048	4.197	6.62	5.889
15.554	18.421	4.732	4.539	10.438	12.16	7.927	8.648	8.61	7.647	3.345	3.459	6.595	5.876
13.722	16.132	5.025	4.818	9.668	8.554	8.252	9.105	10.916	10.739	2.93	2.991	6.569	5.862
13.924	16.416	4.753	4.56	9.714	8.596	8.057	7.943	10.454	10.365	3.136	3.22	6.59	5.874
13.063	15.35	3.898	3.845	8.329	7.941	8.781	8.355	10.802	10.686	1.795	1.794	6.884	6.097
11.182	12.93	3.898	3.845	8.326	8.014	8.74	8.216	10.791	10.656	1.799	1.779	9.652	8.224
8.781	10.011	3.9	3.847	8.302	7.989	8.537	9.156	10.242	8.726	2.503	2.531	9.647	8.223
10.073	11.661	3.895	3.844	8.284	7.967	8.528	9.144	10.364	8.762	7.039	7.573	9.665	8.244
13.13	15.423	3.891	3.84	8.297	7.979	8.267	8.771	10.447	8.815	7.06	7.6	9.645	8.226
13.272	15.62	6.604	6.148	8.306	7.986	8.612	9.263	10.266	8.691	7.063	7.605	8.186	7.159
9.886	10.971	5.246	5.001	7.819	7.415	8.431	9.006	10.519	8.871	4.832	5.05	8.183	7.158
10.367	11.584	5.434	5.16	7.905	7.436	8.614	9.266	10.129	8.624	5.643	5.906	6.625	5.973
10.45	11.688	5.24	4.999	7.88	7.435	8.045	8.455	9.117	9.103	5.296	5.548	6.64	5.98
9.994	11.107	5.377	5.117	7.63	7.191	8.698	9.385	9.072	9.057	5.498	5.829	9.458	8.314
9.865	10.944	5.977	5.971	7.677	7.214	8.602	9.249	8.074	7.175	5.519	5.845	9.312	8.204
9.828	10.908	5.972	5.967	11.79	12.299	16.902	22.727	8.068	7.165	5.493	5.815	7.431	6.711
10.802	12.144	9.983	9.387	11.697	12.196	17.062	22.988	8.098	7.207	5.274	5.395	7.237	6.582
9.844	10.919	10.197	9.556	11.651	12.145	17.111	23.034	8.081	7.186	5.243	5.364	5.393	5.285
9.771	10.827	10.529	9.819	11.745	12.249	17.413	23.506	11.763	11.565	4.408	4.487	5.372	5.273
7.384	7.842	10.343	9.67	11.709	12.209	17.316	23.353	10.878	10.641	3.994	4.06	5.827	5.336
7.508	8.088	10.111	9.492	6.906	6.687	16.952	22.822	11.683	11.48	4.808	4.923	5.84	5.345
9.316	10.258	7.604	7.243	6.762	6.537	17.198	23.175	11.641	11.232	5.136	5.246	4.157	4.106
7.844	8.376	7.867	7.467	6.757	6.533	15.518	20.656	11.647	11.24	5.129	5.239	4.137	4.084
9.124	10.051	7.836	7.439	6.727	6.507	11.571	14.332	11.685	11.416	4.062	4.124	4.116	4.067
17.698	21.578	7.854	7.455	6.71	6.488	13	16.492	9.152	8.169	4.059	4.12	5.529	5.435
18.307	22.307	8.391	7.828	7.785	7.158	12.755	16.048	8.977	8.074	4.086	4.154	5.509	5.421
17.241	20.931	8.338	7.78	8.102	7.381	12.407	15.511	9.061	8.12	4.132	4.201	5.128	5.077
18.225	22.279	8.346	7.788	7.819	7.184	12.817	16.171	9.069	8.132	4.407	4.524	5.164	5.109
18.653	22.818	8.021	7.523	8.124	7.386	12.861	16.193	8.504	7.61	5.382	5.558	6.229	5.831
18.049	22.019	7.32	6.944	8.24	7.472	12.219	15.239	8.554	7.644	5.562	5.748	6.213	5.818
17.272	21.11	7.557	7.141	7.832	7.066	13.526	17.336	8.512	7.635	5.42	5.597	6.345	5.871
9.187	10.13	7.452	7.053	7.754	7.007	13.134	16.733	8.543	7.546	4.702	4.783	6.213	5.769
9.255	10.228	6.917	6.606	7.704	6.97	8.753	8.93	8.672	7.634	4.695	4.778	6.223	5.775
9.185	10.126	10.074	9.112	7.755	7.01	8.914	9.098	7.598	6.828	3.867	3.946	5.595	5.294
9.15	10.077	10.007	9.051	7.572	6.882	8.954	9.195	7.514	6.751	3.943	4.026	5.58	5.278
9.234	10.198	10.028	9.069	8.985	8.834	8.946	9.21	8.039	7.27	3.757	3.83	5.738	5.662
9.107	10.014	8.553	7.831	8.985	8.834	11.974	15.347	7.861	7.135	3.583	3.6	5.748	5.669
7.959	7.879	8.557	7.832	8.967	8.809	12.184	15.661	7.944	7.198	2.834	2.845	5.83	5.641
7.995	7.824	5.073	4.895	9.068	8.982	11.926	15.275	10.197	8.677	2.919	2.932	5.85	5.642
8.138	7.989	5.063	4.881	8.977	8.823	12.75	16.361	10.234	8.686	4.821	4.91	5.81	5.747
8.126	7.982	5.071	4.862	8.851	7.689	12.565	16.113	8.483	8.26	4.844	4.932	5.788	5.724
8.193	8.064	5.069	4.86	8.957	7.785	13.286	17.194	8.372	8.16	5.37	5.492	4.932	4.926
20.487	26.34	6.649	6.168	8.876	7.72	12.202	15.532	12.663	10.22	4.164	4.233	4.935	4.93
20.581	26.519	6.639	6.169	10.542	10.731	12.561	15.831	13.768	10.6	4.524	4.699	3.047	3.018
20.217	25.981	7.014	6.497	10.376	11.388	12.476	15.693	8.07	7.23	7.228	7.784	3.026	2.996
20.446	26.281	6.996	6.481	12.101	14.749	12.681	16.029	10.631	8.861	7.214	7.766	2.251	2.212
15.212	17.851	3.905	3.845	12.01	14.046	13.552	17.547	10.491	8.828	6.945	7.453	2.251	2.213
15.302	17.951	3.901	3.842	11.537	13.283	13.644	17.687	10.469	8.946	3.915	4.01	2.177	2.117
15.164	17.808	3.923	3.854	11.126	12.99	13.608	17.622	10.846	9.279	6.085	6.895	2.177	2.117
15.206	17.842	3.944	3.868	12.238	14.746	16.749	22.47	9.675	8.5	4.179	4.347	2.511	2.479
15.168	17.806	3.936	3.862	12.136	12.579	16.759	22.482	11.587	9.447	3.995	4.14	2.489	2.458
15.25	17.892	3.929	3.855	12.075	12.503	16.705	22.456	10.568	8.857	18.608	20.579	1.784	1.711
6.841	7.627	3.947	3.871	12.346	12.8	13.943	18.175	11.597	9.815	4.243	4.388	1.786	1.712
6.854	7.645	4.33	4.169	12.321	14.489	14.284	18.667	10.578	8.887	15.243	16.873	1.867	1.865
6.86	7.648	4.441	4.268	12.311	15.019	12.583	16.249	12.225	10.077	14.26	15.805	1.868	1.866
6.853	7.652	4.417	4.249	10.285	10.451	13.029	16.879	7.821	7.483	14.08	15.619	2.34	2.275
6.622	7.369	4.106	3.969	10.112	10.385	12.326	15.735	7.828	7.485	14.237	15.77	2.336	2.272
7.131	7.567	5.13	4.878	11.085	12.921	14.264	18.678	8.215	7.887	14.583	16.155	7.477	6.646
7.331	7.864	5.124	4.878	11.718	14.196	15.504	20.773	8.167	7.938	14.586	16.148	13.728	12.431
7.198	7.662	5.142	4.889	11.787	14.266	16.162	21.8	7.895	7.478	15.434	17.105	7.344	6.655
7.437	8.054	5.122	4.879	11.9	14.41	15.943	21.473	9.154	8.345	13.12	14.526	5.99	5.578
7.39	7.962	3.434	3.357	11.845	14.212	14.687	19.518	8.302	8.024	13.933	15.619	6.019	5.605
13.94	16.205	3.428	3.351	11.637	14.119	14.249	18.796	7.415	7.157	14.79	16.422	14.273	12.172
13.861	16.13	2.957	2.947	11.644	14.133	9.75	11.697	8.135	7.63	15.691	17.375	8.597	8.229
13.962	16.249	5.724	5.355	11.628	13.964	9.5	11.33	7.984	7.538	13.543	15.011	8.74	8.319
13.756	15.967	5.714	5.355	11.698	14.155	9.722	11.657	9.211	8.463	14.506	16.088	14.765	12.781
7.818	8.507	5.758	5.384	12.233	14.734	9.243	10.975	7.811	7.657	6.125	6.465	14.805	12.787
7.94	8.627	5.755	5.384	15.458	18.944	10.08	12.19	7.73	7.607	6.15	6.489	13.882	12.021
7.898	8.583	5.859	5.464	14.802	18.108	8.978	10.661	8.217	7.954	5.582	5.897	14.005	12.608
12.022	14.203	4.289	4.186	14.619	17.923	10.92	13.531	8.019	7.804	6.195	6.538	14.054	12.641
12.211	14.488	4.469	4.34	15.055	18.412	10.878	13.46	9.593	8.233	6.107	6.447	6.201	5.761
12.072	14.292	4.483	4.358	15.953	19.637	10.899	13.491	9.863	8.376	3.937	4.112	2.956	2.808
18.823	23.943	3.74	3.732	14.69	17.725	10.926	13.533	10.031	8.476	3.964	4.142	9.653	8.225
19.154	24.428	3.736	3.728	14.819	18.157	10.67	13.091	8.814	7.981	3.885	4.055	9.66	8.237
18.987	24.167	3.73	3.722	15.846	19.329	13.006	16.916	8.762	7.932	3.74	3.898	9.651	8.225
18.957	24.149	4.64	4.458	14.36	17.619	13.121	17.087	8.618	7.634	4.303	4.394	9.641	8.22
9.475	11.017	4.641	4.457	13.988	16.59	13.156	17.14	8.978	7.756	5.802	5.967	1.785	1.711
9.473	11.014	5.185	4.961	9.059	9.357	13.306	17.38	8.986	7.747	5.587	5.742	14.972	12.985
9.375	10.891	7.69	7.284	9.369	9.726	13.298	17.383	8.619	8.147	5.298	5.44	11.861	11.084
10.079	11.82	7.565	7.165	9.099	9.375	13.198	17.23	8.637	8.159	5.607	5.764	14.081	12.793
10.038	11.758	5.705	5.429	9.394	9.71	11.264	13.733	8.568	8.176	5.399	5.546	13.953	12.691
9.518	11.073	7.113	6.832	9.345	9.578	11.185	13.611	8.619	8.222	5.256	5.399	5.909	5.476
9.689	11.301	7.311	7.021	9.156	9.517	11.063	13.413	8.252	7.696	5.21	5.358	3.052	3.023
9.405	10.923	7.425	7.127	9.221	9.498	7.992	9.132	8.228	7.691	5.353	5.483	8.768	8.337
9.738	11.38	7.714	7.382	9.412	9.632	8.014	9.081	8.252	7.703	5.286	5.425	8.702	8.305
7.419	8.205	7.3	7.007	9.437	9.704	7.859	8.855	8.24	7.694	5.239	5.382	16.919	14.08
7.052	7.78	7.585	7.264	9.189	9.637	13.284	16.919	11.006	9.733	5.373	5.514	16.941	14.297
6.8	7.49	7.532	7.22	10.022	10.27	11.608	14.377	10.739	9.529	4.673	4.774	16.769	13.997
7.035	7.759	7.413	7.113	10.097	10.349	12.313	15.445	10.926	9.654	15.138	16.748	17.251	14.588
6.702	7.382	7.591	7.271	9.979	10.24	10.761	13.113	10.749	9.57	14.724	16.27	17.558	14.639
6.975	7.694	7.639	7.314	10.174	10.415	9.77	11.958	10.335	9.278	15.464	17.108	16.325	13.863
7.222	7.971	7.77	7.422	9.822	10.075	9.826	12.051	10.617	9.31	15.572	17.225	16.988	14.394
7.384	8.167	6.253	6.283	9.909	10.073	9.92	12.19	10.72	9.388	10.057	11.349	15.174	13.018
6.851	7.478	6.259	6.291	9.759	9.934	12.223	15.288	10.785	9.429	10.316	11.652	16.874	14.201
6.993	7.639	6.259	6.296	9.758	9.913	12.357	15.495	9.613	8.649	11.045	12.369	16.837	14.261
6.736	7.345	6.243	6.278	9.866	10.026	12.176	15.208	8.686	7.962	11.483	12.867	16.379	13.894
6.898	7.532	6.244	6.281	9.832	9.997	12.451	15.632	7.824	6.969	6.495	7.342	17.32	14.646
6.863	7.49	6.271	6.311	9.879	10.009	14.25	18.622	8.002	7.105	6.56	7.436	16.317	13.832
6.814	7.435	6.398	6.464	9.709	9.901	13.981	18.187	7.932	7.037	6.554	7.429	17.339	14.661
6.018	6.568	6.258	6.278	10.001	10.453	14.337	18.766	7.908	7.029	6.586	7.473	17.221	14.454
5.861	6.396	6.211	6.238	12.205	14.023	14.196	18.537	11.733	9.946	7.655	8.352	15.055	12.926
5.424	5.9	6.205	6.229	12.22	14.041	14.197	18.533	12.087	10.14	7.329	8.002	14.835	12.773
5.489	5.967	9.187	8.415	12.232	14.058	8.143	8.639	11.894	10.032	7.713	8.413	10.43	9.672
5.773	6.291	9.158	8.397	12.264	14.106	8.26	8.754	11.245	9.659	7.657	8.352	10.03	9.399
8.573	9.706	8.781	8.086	12.282	14.131	8.424	8.945	10.734	9.358	7.521	8.21	10.494	9.732
8.577	9.711	9.022	8.276	12.214	14.032	8.003	8.501	12.32	10.272	8.302	9.072	10.26	9.56
8.582	9.721	8.965	8.233	12.225	14.047	8.398	9.032	11.076	9.588	7.833	8.541	10.296	9.59
8.582	9.72	8.415	7.763	16.858	21.326	7.958	8.415	11.984	10.088	7.871	8.585	10.586	9.8
8.577	9.707	7.386	6.884	17.095	21.363	8.892	9.598	8.604	7.937	12.549	14.085	10.451	9.702
8.575	9.71	8.981	8.228	17.17	21.5	7.836	8.328	8.1	7.695	12.598	14.128	7.599	6.997
10.282	12.266	8.648	7.978	17.249	21.635	11.267	13.984	8.106	7.698	12.776	14.314	8.299	7.136
10.226	12.208	8.863	8.161	17.227	21.517	11.14	13.809	8.123	7.7	13.013	14.574	8.106	7
10.302	12.316	7.451	6.878	11.995	15.02	15.937	21.183	8.115	7.698	4.374	4.464	8.358	7.18
10.191	12.169	7.51	6.932	11.939	14.942	15.937	21.183	8.882	7.131	4.364	4.453	8.346	7.165
10.212	12.185	6.101	5.717	12.004	15.041	12.373	15.603	8.805	7.09	4.395	4.488	7.636	6.665
10.131	12.025	7.292	6.741	11.949	14.935	12.794	16.198	8.871	7.126	4.398	4.473	7.818	6.795
10.795	12.855	7.222	6.69	11.102	13.046	12.639	15.776	8.84	7.111	4.685	4.787	8.292	7.131
10.344	12.289	7.288	6.743	11.166	13.132	12.64	15.764	8.927	7.175	4.234	4.312	8.108	7.001
10.376	12.331	7.207	6.674	11.361	13.395	12.417	15.661	7.547	7.089	4.195	4.265	7.998	6.924
10.152	12.05	7.237	6.697	11.082	13.005	12.545	15.837	7.549	7.092	4.344	4.421	5.419	5.004
10.498	12.479	7.339	6.783	11.293	13.376	12.818	16.221	7.461	7.052	4.668	4.754	5.49	5.065
10.985	13.112	7.023	6.502	11.284	13.378	12.671	16.006	7.864	7.2	4.677	4.763	5.302	4.913
9.993	11.815	7.171	6.646	11.289	13.367	12.341	15.514	7.364	6.986	4.926	5.022	5.376	4.963
11.182	13.364	7.2	6.66	11.329	13.371	12.362	15.547	7.28	6.882	6.221	6.4	5.39	4.978
11.571	13.864	6.842	6.76	10.299	11.808	8.942	10.431	8.904	8.48	4.474	4.541	5.359	4.953
10.927	13.033	6.908	6.813	10.456	12.008	8.904	10.381	9.015	8.55	4.689	4.786	5.332	4.934
10.306	12.232	6.854	6.772	10.416	11.957	10.775	13.134	9.082	8.592	4.646	4.74	2.166	2.071
5.544	5.679	6.878	6.795	10.509	12.077	10.894	13.311	9.102	8.605	4.594	4.685	2.169	2.07
5.529	5.651	5.501	5.462	9.297	10.57	10.338	12.582	8.899	8.478	6.041	6.572	2.154	2.06
5.588	5.731	5.443	5.397	9.496	10.809	10.316	12.55	9.234	8.685	6.301	6.842	2.18	2.083
5.108	4.999	5.481	5.441	9.78	11.153	9.099	10.58	11.822	10.154	6.215	6.754	2.066	1.979
11.762	13.797	5.492	5.45	9.353	10.636	9.521	11.237	11.86	10.075	6.375	6.915	2.15	2.059
11.794	13.829	7.311	7.174	9.306	10.582	9.992	12.075	11.819	10.047	6.674	7.163	7.159	6.331
11.784	13.816	7.301	7.166	12.479	14.49	10.193	12.375	11.813	10.053	6.696	7.212	5.127	4.779
11.771	13.8	7.158	7.058	12.451	14.457	11.762	14.631	8.008	7.142	6.695	7.206	5.133	4.784
12.09	14.159	7.249	7.249	12.514	14.535	11.722	14.566	7.999	7.138	6.701	7.219	5.191	4.83
11.751	13.799	7.283	7.282	11.445	13.129	18.645	25.103	7.969	7.116	6.683	7.583	8.621	8.7
7.698	8.593	7.259	7.26	11.682	13.439	18.707	25.195	6.925	6.808	6.847	7.815	8.624	8.69
7.702	8.598	7.294	7.293	11.604	13.33	19.102	25.769	6.924	6.805	6.86	7.824	8.457	8.543
7.751	8.655	7.129	6.894	11.701	13.443	28.373	39.318	6.926	6.806	5.888	6.795	8.461	8.56
7.673	8.565	7.03	6.809	11.659	13.433	28.557	39.584	11.543	9.619	5.856	6.758	14.385	12.34
7.618	8.5	7.22	6.971	11.205	12.774	31.559	44.032	11.49	9.583	6.028	6.32	14.221	12.178
9.978	11.699	7.09	6.865	10.81	11.956	31.365	43.761	11.494	9.589	6.024	6.315	14.251	12.218
9.964	11.677	7.066	6.845	10.638	11.714	31.315	43.683	8.313	7.915	5.768	6.338	14.294	12.225
9.98	11.696	6.982	6.768	10.692	11.8	32.621	45.511	8.371	7.951	6.619	7.218	13.737	11.802
12.139	14.192	6.492	6.326	10.727	11.848	32.581	45.457	8.359	7.939	6.284	6.862	14.657	12.508
12.028	14.053	6.957	6.694	11.125	12.479	30.892	43.008	10.392	8.528	4.659	4.801	6.64	5.89
12.267	14.364	6.666	6.426	8.181	8.283	30.808	42.883	10.241	8.42	4.678	4.821	6.616	5.867
12.019	14.061	6.322	6.12	8.179	8.263	21.177	29.231	10.685	8.741	3.907	3.975	6.587	5.844
8.603	9.885	6.651	6.418	8.109	8.362	21.601	29.807	8.414	7.347	3.906	3.975	6.644	5.897
8.49	9.741	6.328	6.124	8.083	8.265	27.696	38.324	8.426	7.377	6.84	7.433	16.734	13.891
8.251	9.436	7.148	6.866	9.337	9.487	27.035	37.343	8.365	7.348	6.894	7.493	16.408	13.65
8.568	9.755	5.916	5.752	12.95	16.686	28.616	39.683	7.92	7.119	4.625	4.708	15.792	13.195
8.525	9.699	6.17	5.992	12.625	16.133	15.318	20.557	7.818	7.045	4.619	4.702	16.153	13.462
7.748	8.334	6.193	6.016	12.804	16.434	15.315	20.565	8.025	7.143	7.805	8.585	16.063	13.682
7.777	8.364	6.079	5.907	12.778	16.389	19.661	26.88	7.911	7.123	8.112	8.934	15.884	13.596
7.778	8.362	5.953	5.788	10.983	13.702	19.428	26.546	8.208	7.269	7.987	8.787	16.078	13.691
6.765	6.631	6.024	5.853	10.978	13.695	14.272	18.882	8.197	7.257	5.132	5.456	16.11	13.728
6.78	6.63	7.388	7.36	11.102	13.883	12.647	16.382	8.186	7.248	5.135	5.457	8.766	8.599
6.738	6.6	7.259	7.248	10.946	13.635	32.258	45.124	8.506	7.482	4.7	5.089	8.657	8.5
4.216	4.257	7.224	7.19	15.353	18.793	32.218	45.051	8.6	7.595	5.44	5.749	8.742	8.571
4.228	4.268	7.375	7.345	14.301	17.622	8.156	9.541	8.607	7.603	5.433	5.741	8.648	8.478
8.268	9.117	7.423	7.382	14.117	17.385	8.054	9.387	8.707	7.707	2.935	2.949	13.681	11.569
8.408	9.213	9.338	8.509	12.142	14.754	8.174	9.591	8.222	8.067	3.863	4.03	13.848	11.676
8.134	8.887	8.582	7.861	11.695	14.082	8.094	9.472	8.387	8.328	3.078	3.186	13.621	11.528
7.517	8.433	9.377	8.548	12.115	14.702	8.066	9.128	8.404	8.329	2.973	3.038	14.263	11.946
7.579	8.503	9.105	8.307	11.916	14.417	7.978	9.023	8.305	8.204	3.037	3.121	14.332	11.991
5.468	5.166	8.877	8.116	14.106	18.253	8.469	9.971	11.42	9.767	1.856	1.807	13.355	11.355
5.494	5.188	7.797	7.183	14.13	18.256	8.08	9.39	11.305	9.688	1.774	1.754	11.169	9.31
5.32	5.042	7.898	7.238	14.128	18.312	8.392	7.755	11.293	9.687	2.298	2.325	11.174	9.314
4.534	4.812	7.929	7.263	14.134	18.335	8.1	7.431	11.309	9.678	7.581	7.864	11.16	9.303
4.516	4.792	7.958	7.287	11.072	13.534	8.102	7.401	11.279	9.689	7.659	7.948	11.15	9.295
6.02	6.406	7.886	7.255	11.087	13.536	16.82	23.203	11.305	9.673	7.709	8.002	11.139	9.294
6.048	6.437	7.993	7.316	11.102	13.523	16.829	23.21	8.767	8.766	4.672	4.811	5.438	4.974
6.075	6.467	4.147	4.034	10.929	13.351	16.871	23.25	8.713	8.709	5.08	5.268	5.397	4.941
3.37	3.39	4.164	4.049	10.893	13.272	16.892	23.291	9.267	7.829	4.982	5.132	7.378	7.905
3.373	3.393	4.182	4.065	10.889	13.265	16.795	23.172	9.321	7.856	5.278	5.63	7.458	7.984
10.315	12.333	4.197	4.081	10.912	13.312	16.912	23.292	9.095	7.745	5.348	5.744	7.528	8.051
8.391	9.028	4.122	4.011	11.674	13.451	17.215	23.374	9.201	7.795	5.33	5.715	7.471	7.995
8.536	9.313	7.588	6.978	11.424	13.15	16.65	22.532	8.762	8.649	5.352	5.477	13.731	11.608
9.877	10.96	8.03	7.353	11.67	13.44	17.014	22.969	8.595	8.404	5.329	5.455	13.625	11.549
18.377	22.45	7.994	7.315	11.411	13.147	16.642	22.343	8.748	8.628	4.376	4.461	13.652	11.551
10.025	11.757	8.058	7.38	11.699	13.494	16.579	22.279	8.897	8.649	3.993	4.063	13.934	11.769
11.887	13.857	8.103	7.409	10.07	12.436	16.179	21.632	8.893	8.646	3.732	3.793	16.246	13.53
8.512	9.683	6.366	6.338	10.083	12.456	15.132	20.399	8.787	8.647	5.578	5.72	16.279	13.543
13.964	16.247	6.362	6.336	10.04	12.39	15.356	20.785	9.724	8.496	5.594	5.736	16.267	13.54
9.922	11.016	7.329	7.205	10.017	12.355	15.234	20.575	9.684	8.485	3.859	3.91	16.246	13.532
8.576	9.708	7.366	7.232	11.544	14.329	10.709	12.925	9.704	8.491	3.877	3.928	10.876	9.928
10.014	11.878	7.424	7.274	11.549	14.34	10.623	12.795	9.686	8.483	3.94	4	11.174	10.198
10.312	11.515	7.391	7.25	11.519	14.287	10.724	12.951	9.643	8.311	3.986	4.047	11.007	10.059
7.579	8.502	7.353	7.221	17.497	21.066	10.41	12.469	9.608	8.288	4.421	4.532	11.019	10.067
5.536	5.223	7.183	6.926	17.384	20.902	10.601	12.757	9.701	8.363	5.551	5.733	12.537	11.344
9.449	10.426	7.399	7.118	17.361	20.882	10.814	13.083	9.078	8.06	5.761	5.956	12.202	11.062
5.103	4.994	7.394	7.113	17.36	20.912	9.642	10.95	9.189	8.143	5.664	5.853	12.3	11.147
4.233	4.27	7.4	7.119	17.478	21.044	9.969	11.435	8.267	7.36	4.792	4.883	12.291	11.142
6.865	7.656	6.955	6.66	9.187	10.516	9.968	11.458	8.2	7.279	4.766	4.857	17.451	14.137
9.481	11.025	6.863	6.577	9.299	10.698	10.104	11.641	9.265	8.103	3.993	4.063	16.778	13.688
11.979	13.8	6.925	6.634	9.211	10.59	8.222	9.401	9.012	7.957	4.078	4.152	16.865	13.746
12.263	14.179	6.967	6.702	9.254	10.627	8.223	9.407	9.123	8.032	3.913	3.98	17.074	13.887
12.028	13.777	7.6	7.676	12.419	14.335	7.651	8.645	10.416	9.079	3.38	3.401	16.77	13.683
11.978	13.752	7.661	7.716	12.363	14.268	17.447	24.145	10.473	9.116	2.958	2.973	10.065	9.6
12.038	13.78	7.626	7.692	12.431	14.349	17.559	24.279	9.286	8.568	3.045	3.061	10.257	9.699
12.101	13.95	7.475	7.592	12.513	14.446	17.487	24.197	9.214	8.529	6.501	6.692	10.322	9.726
12.218	14.093	6.562	6.267	17.48	21.31	15.489	20.801	10.539	8.938	6.556	6.749	10.355	9.747
11.435	12.917	6.484	6.198	17.547	21.321	15.487	20.819	10.582	8.667	5.161	5.278	10.395	9.757
10.339	11.715	6.514	6.223	17.319	21.192	14.94	20.254	8.368	7.349	4.291	4.363	7.572	7.132
12.453	14.4	6.128	5.844	12.47	14.321	14.991	20.341	17.293	12.394	4.474	4.82	7.433	7.013
12.128	13.955	6.126	5.841	12.432	14.285	14.946	20.273	16.932	12.183	5.981	6.154	7.461	7.04
12.139	14.04	4.889	4.741	12.567	14.433	11.811	14.39	15.906	11.587	5.756	5.92	7.395	6.98
12.706	14.814	4.856	4.71	12.437	14.284	11.846	14.433	14.799	10.945	5.361	5.506	9.279	9.335
12.763	14.811	4.658	4.524	13.344	16.43	12.171	14.954	16.298	11.814	4.585	4.72	9.218	9.305
12.826	14.887	4.662	4.527	13.438	16.564	12.384	15.302	14.833	11.053	5.854	6.755	9.261	9.328
12.63	14.683	11.261	9.978	17.367	21.368	15.801	21.152	17.042	12.247	3.939	4.115	9.284	9.338
12.53	14.561	10.69	9.507	17.356	21.444	15.829	21.168	12.641	9.678	3.837	4.002	11.872	10.524
12.471	14.503	7.444	6.949	13.291	15.508	9.79	11.471	16.841	12.13	14.306	15.799	11.745	10.436
12.881	14.908	7.435	6.943	13.35	15.587	9.878	11.598	10.224	8.245	4.373	4.463	11.88	10.534
12.367	14.331	4.231	4.132	13.698	16.031	9.824	11.53	8.083	7.244	11.592	12.979	12.124	10.704
12.292	14.234	4.22	4.124	13.852	16.236	10.258	12.321	8.07	7.233	11.545	12.907	12.002	10.621
9.531	10.615	4.287	4.174	11.608	13.944	10.363	12.471	9.147	7.929	11.781	13.167	2.28	2.169
11.581	13.698	3.498	3.438	11.684	14.09	10.21	12.244	9.295	8.118	11.309	12.644	2.265	2.156
11.388	13.007	3.487	3.429	11.65	14.039	9.752	10.703	7.485	6.899	11.522	12.888	2.26	2.151
9.299	10.253	3.478	3.422	7.312	7.676	9.563	10.447	8.475	7.395	11.333	12.677	2.822	2.697
13.673	16.42	3.502	3.441	7.389	7.736	9.792	10.768	9.567	8.233	11.871	13.31	2.823	2.697
20.48	25.264	5.018	4.747	10.352	10.402	9.808	10.602	6.653	6.51	10.645	11.885	5.512	4.861
20.448	25.334	5.048	4.776	10.469	10.622	9.585	10.508	7.182	6.754	11.951	13.455	5.55	4.883
20.56	25.406	5.091	4.814	10.24	10.315	5.806	5.782	7.458	6.888	12.785	14.302	5.512	4.857
20.489	25.275	4.909	4.645	10.075	10.091	5.824	5.804	9.556	7.99	11.78	13.206	5.522	4.864
20.625	25.463	4.083	3.964	10.192	10.246	5.8	5.777	7.283	6.854	11.09	12.387	5.526	4.867
20.57	25.397	4.048	3.934	10.287	10.37	5.89	5.88	6.781	6.521	12.036	13.459	8.558	7.234
19.917	24.525	4.074	3.956	10.224	10.654	6.396	6.492	8.763	7.812	5.337	5.624	8.611	7.277
9.362	10.166	4.029	3.918	10.386	10.76	6.409	6.521	7.517	7.017	5.399	5.683	8.655	7.313
9.405	10.219	4.002	3.859	10.345	10.744	6.414	6.53	17.368	12.449	5.056	5.359	8.629	7.291
9.361	10.164	4.001	3.858	9.594	9.871	6.411	6.525	17.547	12.56	5.291	5.579	8.972	7.561
9.34	10.138	3.406	3.317	9.689	9.953	6.159	5.949	17.53	12.544	5.271	5.558	8.504	7.367
9.392	10.203	4.733	4.511	10.062	10.858	6.17	5.951	15.414	11.361	4.767	4.963	8.539	7.395
9.312	10.103	4.709	4.493	9.878	10.594	6.195	5.95	15.168	11.23	4.84	5.04	8.53	7.394
7.381	7.567	4.709	4.489	9.759	10.431	6.214	5.944	17.068	12.343	4.561	4.743	8.614	7.453
7.475	7.617	4.729	4.507	10.02	10.789	7.048	7.493	19.338	13.718	4.089	4.24	8.401	7.301
7.416	7.585	4.499	4.304	9.874	10.591	7.14	7.614	19.472	13.818	4.776	4.868	8.365	7.274
7.418	7.586	3.609	3.546	7.103	6.943	7.177	7.662	10.574	8.839	5.326	5.433	10.016	8.531
7.396	7.575	3.773	3.687	6.869	6.699	9.467	10.673	10.663	8.887	5.222	5.326	9.963	8.481
12.984	15.103	3.751	3.67	6.861	6.691	9.772	11.007	9.479	8.248	5.112	5.213	11.905	9.892
12.946	15.075	4.072	4.021	6.859	6.693	9.847	11.092	9.543	8.292	5.327	5.433	11.601	9.667
12.814	14.913	4.069	4.019	6.824	6.655	9.931	11.185	11.329	9.234	5.235	5.339	6.679	6.01
12.999	15.123	4.065	4.014	7.885	7.167	9.728	10.962	11.075	9.102	6.14	6.329	6.31	5.773
15.06	18.451	5.187	4.938	8.503	7.69	6.682	6.68	11.207	9.185	6.175	6.373	5.027	4.897
15.107	18.486	5.235	4.976	7.953	7.227	7.171	7.213	11.207	9.172	6.153	6.33	5.01	4.879
14.912	18.255	9.928	9.018	8.556	7.722	7.131	7.169	12.578	9.615	6.132	6.316	7.101	6.296
15.092	18.497	7.705	7.375	8.893	8.096	7.123	7.165	13.146	9.942	6.162	6.354	7.146	6.332
14.974	18.34	7.235	6.945	7.906	7.284	7.095	7.132	12.854	9.778	6.093	6.273	3.621	3.48
15.091	18.482	7.262	6.717	7.747	7.134	7.641	7.846	12.932	9.809	5.314	5.451	3.653	3.5
9.704	11.209	6.543	6.957	7.647	7.045	7.582	7.786	13.679	10.235	11.37	12.763	3.615	3.472
9.699	11.206	6.594	7.029	7.754	7.148	7.502	7.688	8.098	7.189	11.103	12.449	5.921	5.664
[truncated: 7,148 more rows]

## Sheet: Fig2.b
13.38	13.342	7.568	7.565	13.642	13.465	13.023	13.087	11.247	11.236	9.527	9.502	10.683	10.675
[truncated: 7,999 more rows]
