# Supplementary material for: Kalman filter inversions on NO x and VOCs emissions in China using TROPOMI satellite observations
Source: Copernicus journal article supplement (doi:10.5194/egusphere-2025-2687), 2025-08-27
Supplement: Supplementary file 1 [file Supplementary material text-20250827-new_map_source.pdf › Supplementary material text-20250827-new_map_source.pdf]

## Supplementary material

### Supplementary material text

**S1. Analysis of mutual influence among source regions.** In the inversion process, it assumed that the boundary areas provided enough distance to eliminate the influence among source regions; hence, the pollutant emissions from one region would not have a large effect on the surrounding source areas. To demonstrate the accuracy of this assumption in this simulation, seven simulation regions and one buffer region were selected as the inversion regions in this study. The purpose of the buffer region was to reduce the influence of emission sources outside the study area on the NO<sub>2</sub> or HCHO concentrations in that region, and minimized the influence of boundary conditions on the inversion regions as well. The sensitivity of HCHO concentration to VOCs emissions and NO<sub>2</sub> concentrations to NO<sub>x</sub> emissions for each simulated source area were obtained. The sensitivity of NO<sub>2</sub> or HCHO concentration to VOCs or NO<sub>x</sub> emissions in each area was calculated as a proportion of the total sensitivity (**Figs. S2 and S3**).

As shown in **Fig. S2**, NO<sub>x</sub> emissions from each region had the largest effect on NO<sub>2</sub> concentrations within that region, whereas the effect on other regions was only near the adjacent boundaries of the two regions, and the contribution to other regions did not exceed 10%. Similarly, the VOCs emissions in each region in **Fig. S3** had the largest effect on the HCHO concentration in that region, whereas the effect on other regions was small. The spatial distribution of the sensitivity percentage of VOCs

emissions to HCHO was more regional than that of NO<sub>x</sub> emissions to NO<sub>2</sub> concentrations. In general, the influence of the contribution from the boundary area was not significant, providing a reasonable separation to eliminate the boundary effects in the inversion. The locally emitted NO<sub>x</sub> or VOCs in each inversion region were the main contributors to the NO<sub>2</sub> or HCHO concentrations in each inversion region, ensuring the reliability of the inversion results.

**S2. Effects of changes in the covariance matrix of the pseudodata test.** The pseudodata test enabled simultaneously checking the effects of the changes in the covariance matrix of  $A_i$  and  $R_i$  in the latest method on the inversion results. It showed that the emission adjustment factors of NO<sub>x</sub> and VOCs for the simulation area could be infinitely close to 1 ( $\delta < 0.01$ ) after four to five iterations, and the inversion after the first iteration were already very close to the final results. Considering the computational cost and the difficulty of simulation, the response of the first iteration of the test inversion process was sufficient to obtain the influence of the covariance matrices  $A_i$  and  $R_i$  on inversion results. In addition, two pollutants, NO<sub>x</sub> and VOCs, were both involved with different covariance matrices,  $A_i$  and  $R_i$ . When testing the covariance matrices of  $A_i$  and  $R_i$ , it was necessary to consider the effects when those matrices of two pollutants changed simultaneously. It was also necessary to consider the effect of separate changes on the covariance matrices of a particular  $A_i$  and  $R_i$  on the inversion results, while keeping the other  $A_i$  and  $R_i$  remain constant.

43 To determine the sensitivities of the inversion results to the simulated and measured  
44 errors, the covariance matrices of  $A_i$  and  $R_i$  of both  $\text{NO}_x$  and VOCs changed  
45 simultaneously. The NC region was selected as the test area, and the trends of the  
46 adjustment factors for  $\text{NO}_x$  and VOCs were obtained after applying same changes to  
47 the  $\sigma(\text{obs})$  and  $\sigma(\text{E})$  (**Fig. S4**). The trend showed that as the value of  $\sigma(\text{obs})$  increasing  
48 and the value of  $\sigma(\text{E})$  decreasing, the adjustment factor became larger, especially  
49 when  $\sigma(\text{obs})$  greater than  $1.2 \times 10^{15} \text{ molec}\cdot\text{cm}^{-2}$  and  $\sigma(\text{E})$  less than 30%. However, in  
50 general, the effects of  $\sigma(\text{E})$  and  $\sigma(\text{obs})$  fluctuations on the inversion results were  
51 relatively small.

52 In the subsequent tests, four scenarios were set up in which the other three errors were  
53 remain constant when a certain error was varied, to determine the effects of the  
54 variation of the covariance matrix of a certain  $A_i$  and  $R_i$  on the final inversion  
55 results (**Fig. S5**). **Figure S5a** showed when fixing the  $\sigma(\text{obs})$  of VOCs at  $0.8 \times 10^{15}$   
56  $\text{molec}\cdot\text{cm}^{-2}$  and the  $\sigma(\text{E})$  of  $\text{NO}_x$  and VOCs at 200%, the variations of  $\text{NO}_x$  emission  
57 adjustment factors with  $0.1 \times 10^{15} \text{ molec}\cdot\text{cm}^{-2}$  interval of the  $\sigma(\text{obs})$  of  $\text{NO}_2$  between  
58  $0.5 \times 10^{15} \text{ molec}\cdot\text{cm}^{-2}$  to  $1.5 \times 10^{15} \text{ molec}\cdot\text{cm}^{-2}$ . **Figure S5b** showed when fixing the  
59  $\sigma(\text{obs})$  of  $\text{NO}_x$  at  $0.8 \times 10^{15} \text{ molec}\cdot\text{cm}^{-2}$  and the  $\sigma(\text{E})$  of  $\text{NO}_x$  and VOCs at 200%, the  
60 variations of VOCs emission adjustment factors with  $0.1 \times 10^{15} \text{ molec}\cdot\text{cm}^{-2}$  interval  
61 of the  $\sigma(\text{obs})$  of HCHO between  $0.5 \times 10^{15} \text{ molec}\cdot\text{cm}^{-2}$  to  $1.5 \times 10^{15} \text{ molec}\cdot\text{cm}^{-2}$ .  
62 Among them, the adjustment factors of VOC emissions in the SC region fluctuated  
63 slightly more than that of other regions, but in general, the overall variations were

insignificant. Similarly, **Figs. S5c** and **S5d** showed when fixing the  $\sigma(\text{obs})$  of  $\text{NO}_x$  and VOCs at  $0.8 \times 10^{15} \text{ molec} \cdot \text{cm}^{-2}$  and fixing the  $\sigma(\text{E})$  of  $\text{NO}_x$  or VOCs at 200%, the variations of adjustment factors with  $\sigma(\text{E})$  of VOCs or  $\text{NO}_x$  varied from 100% to 200%.

Under the scenario with fixed  $\sigma(\text{E})$ , the adjustment factors of  $\text{NO}_x$  emissions were not sensitive to the changes in the  $\sigma(\text{obs})$  from  $0.5 \times 10^{15} \text{ molec} \cdot \text{cm}^{-2}$  to  $1.5 \times 10^{15} \text{ molec} \cdot \text{cm}^{-2}$ . The maximum difference of adjustment factors among source areas was approximately  $-0.022$ . The variations of VOCs emission adjustment factors were slightly larger in changing of  $\sigma(\text{obs})$ , especially for SC and CC regions, with gradually increased trend (approximately 0.050 and 0.323) when  $\sigma(\text{obs})$  changing from  $0.5 \times 10^{15} \text{ molec} \cdot \text{cm}^{-2}$  to  $1.5 \times 10^{15} \text{ molec} \cdot \text{cm}^{-2}$ . However, the adjustment factors in other regions had smaller variations. Under the scenario of fixed  $\sigma(\text{obs})$ , the adjustment factors of  $\text{NO}_x$  and VOCs emissions were not sensitive to the change of  $\sigma(\text{E})$ , and almost remained the same during the variations of  $\sigma(\text{E})$  from 100% to 200%.

Comparisons of the effects of  $\sigma(\text{E})$  and  $\sigma(\text{obs})$  on the adjustment factors under various scenarios showed that some source regions were more sensitive to changes in  $\sigma(\text{obs})$  than that in other parameters. Since the inversion process required for several iterations, the influences of  $\sigma(\text{E})$  and  $\sigma(\text{obs})$  would gradually decrease in each iteration, and the adjustment factors could return to the error-permissible range (**Fig. S5**).

**S3. Model performance of meteorological parameters.** The WRF model was used in this study to provide the meteorological field for the CAMx model. The simulated meteorological variables, such as temperature, relative humidity, barometric pressure, and wind speed were validated with the observed values from 1 June to 30 September 2019 in this section. The simulated daily meteorological results of the model grid where the meteorological stations located were extracted and compared to monitored meteorological elements.

A comparative analysis of simulated versus observed meteorological data, including wind speed, temperature, relative humidity, and atmospheric pressure, across all monitoring stations in China (**Figs. S6 to S8**) was conducted. The results showed high consistency between simulation results and observed data in most regions. Correlation analysis (**Fig. S6**) demonstrated that the model effectively captured the meteorological trends, with correlation coefficients ( $R$ ) for temperature, humidity, and atmospheric pressure consistently exceeding 0.8, indicating a robust alignment with observational data. Although the correlation for wind speed was marginally lower, it showed satisfactory agreement in the central and eastern parts of China. The distribution of the normalized mean bias (NMB) and normalized mean error (NME) highlighted systematic biases within certain regions (**Figs. S7 and S8**). Specifically, atmospheric pressure and temperature showed minimal bias in the central and eastern regions, suggesting high fidelity in simulation accuracy. Conversely, the temperature was slightly underestimated in the southwestern regions, potentially attributable to the

complex topography and distinct climatic characteristics of the area. Wind speed was overestimated nationwide. Relative humidity was found to be underestimated in the northeastern regions, whereas a slight overestimation was observed in the southern regions.

On a daily average basis, the verification outcomes of meteorological elements across various regions of this study were statistically compiled (**Tables S2 to S5**), showing a high degree of congruence between simulated temperature and atmospheric pressure and their observed counterparts throughout the simulation period. The NMB for atmospheric pressure and temperature in each region was negative, suggesting a minor underestimation relative to observed data. Nevertheless, the  $R$  for atmospheric pressure exceeded 0.90, and those for temperature were above 0.70. Furthermore, the simulated relative humidity demonstrated a reasonable alignment with observations, with an averaged NMB within  $\pm 14.5\%$ , and  $R$  were approximately above 0.70. The averaged NMB for wind speed was approximately 37%, with all  $R$  exceeding 0.5. Collectively, these results indicated that the model was capable of replicating the observed meteorological conditions for most of the simulation period, with relatively minor errors in model performance assessment.

**S4. Impacts of inversion on ground-level NO<sub>2</sub> concentrations.** Figure S9 showed scatter plots of comparisons between simulated and monitored NO<sub>2</sub> concentrations across key regions in China. The analysis found that both prior and posterior simulations generally underestimated NO<sub>2</sub> levels, with particularly

pronounced underestimations in the Northwest (NWC) region in China. Simulations with posterior emissions showed even lower NO<sub>2</sub> concentrations comparing to their prior counterparts, possibly attributing to the typically low column NO<sub>2</sub> concentrations observed by the satellite in NWC. In addition, the wind speed was mostly overestimated in the meteorological simulation as showed in Fig S6-S8, coupled with large uncertainties of VOCs emissions in these areas. In studies that generally use inversion models to optimize emission inventories, it is common to observe that the simulated surface NO<sub>2</sub> concentrations are lower than the observed values and the results are even lower than the a priori emission. Wang et al. (2020) found in their inversion of NO<sub>x</sub> emissions in China that the NO<sub>x</sub> emissions decreased significantly after inversion, and the simulated surface NO<sub>2</sub> concentrations in some regions were lower than the observed values. Cheng et al. (2021) also pointed out in their study on the Beijing-Tianjin-Hebei region that even after optimizing emissions using the 3D-VAR method, the simulation of surface NO<sub>2</sub> was still underestimated.

The core reasons for this phenomenon can be summarized into three aspects: First, there is a bias in the vertical allocation of emissions in the a priori emission inventory, which is manifested as an underestimation of the actual lifting height of elevated sources. This leads to an excessive amount of NO<sub>x</sub> being incorrectly allocated to the upper boundary layer. Such structural errors in the vertical direction result in significantly lower simulated NO<sub>2</sub> at surface stations compared to observations, even when the total emission amount is correct. Second, there are differences in sensitivity between satellite

147 observations and surface processes. Satellite data mainly constrain the total column  
148 concentration but are insufficient in capturing near-surface vertical mixing and small-  
149 scale emission hotspots. Moreover, ground-based stations are over-represented in urban  
150 high-emission areas, while satellite retrievals capture contributions from rural  
151 distributed sources. The scale difference between the two leads to the necessity of  
152 reducing the total emissions during the inversion process to address the high observed  
153 values at urban stations (assuming overestimation in the a priori emissions), making  
154 final inversion results being even lower than the a priori emission inventory.

155 However, the joint inversion approach had notable improvements in the simulation  
156 performance for NO<sub>2</sub> concentrations in the EC and CC regions. These enhancements  
157 were evidenced by the adjusted simulation results from postinversions, which aligned  
158 more closely with ground observations. **Table S6** corroborated this trend, showing a  
159 significant improvement in model performance metrics by the joint inversion, while  
160 maintaining the integrity of the underlying trends.

161 A comparative analysis was performed on satellite-derived and simulated daily NO<sub>2</sub>  
162 and HCHO column concentrations from June to September 2019, with statistical  
163 metrics including R, NMB, and NME (**Table S7**). For HCHO, the joint inversion  
164 method performed prominently in most regions. The R values in most regions were  
165 improved, except in the EC and SC regions, but the declines were relatively  
166 insignificant. Meanwhile, the NMB in all regions decreased, especially in the SC  
167 region dropping from -48.21% to -19.13%. The NME decreased in all regions after



inversions. For  $\text{NO}_2$ , the joint inversion method also showed good performance. The  
 R values in most regions were improved, with only slight decreases in the EC and SC  
 regions. The NMB decreased, especially in the CC region, changed from 29.84% to -  
 13.64%. The NME in most regions decreased, with only a slight increase in the NEC  
 region. Due to cloud interference, daily satellite data is usually difficult to achieve full  
 coverage of the interested domain. Therefore, long-term averaged values often used  
 for comparison with modeled data in the inversion processes. However, this approach  
 tends to overlook the diurnal variations in emissions, introducing a certain degree of  
 uncertainty into the inversion results. Based on the daily comparison results, the joint  
 inversion method in general outperformed the priori and individual inversion methods  
 in simulating both HCHO and  $\text{NO}_2$  in most source regions.

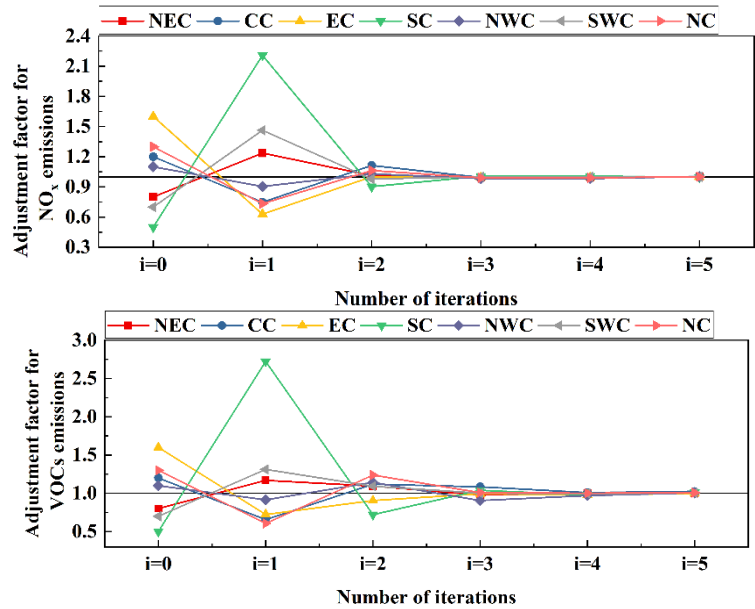

**Fig. S1. Pseudodata testing multiple iterations of emission adjustment factors for  $\text{NO}_x$  and VOCs emissions in various regions**

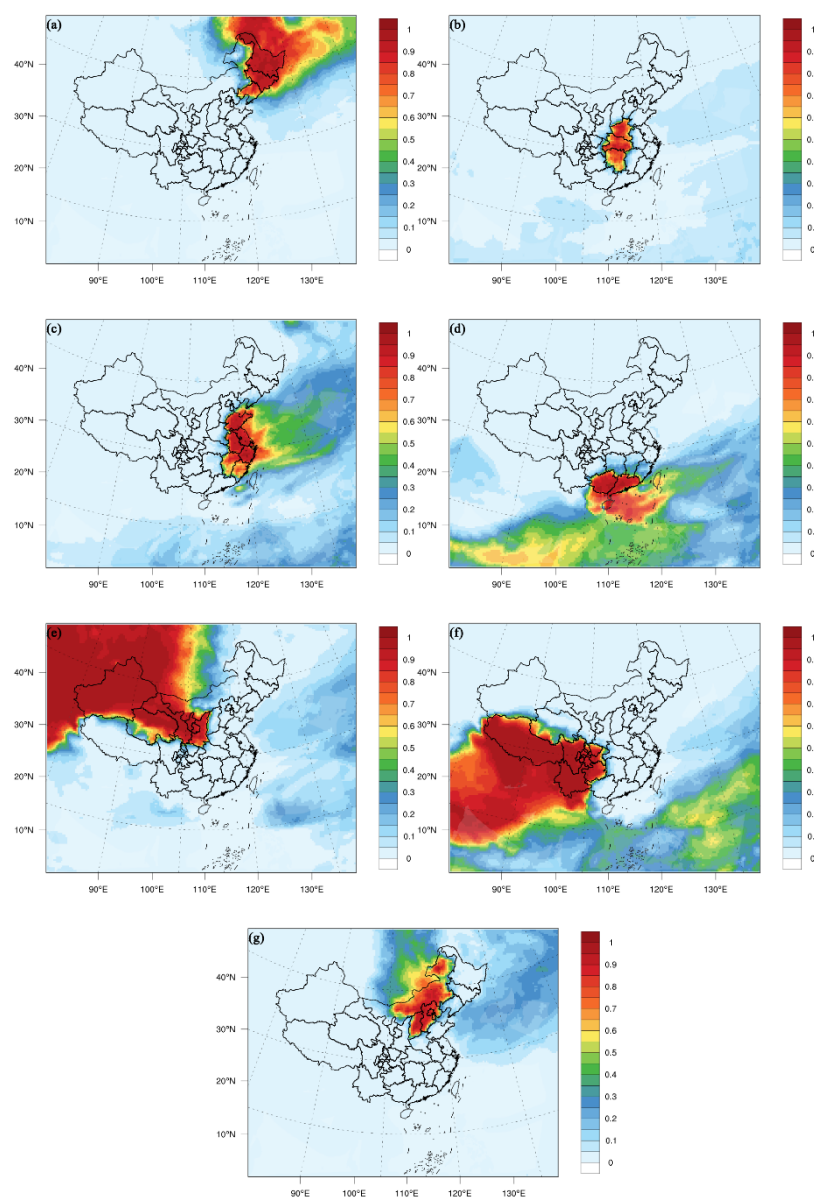

**Fig. S2. Spatial distribution of the sensitivity percentages of simulated column NO<sub>2</sub> concentrations to local NO<sub>x</sub> emissions for each simulated region**

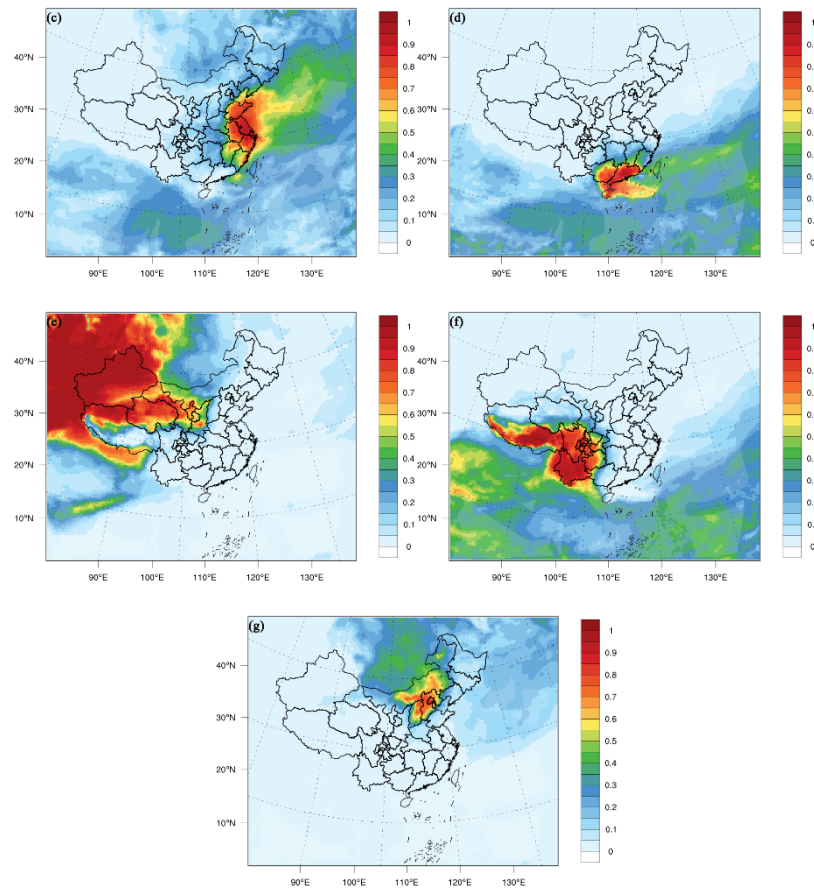

**Fig. S3, Spatial distribution of the sensitivity percentages of simulated column HCHO concentrations to local VOCs emissions for each simulated region**

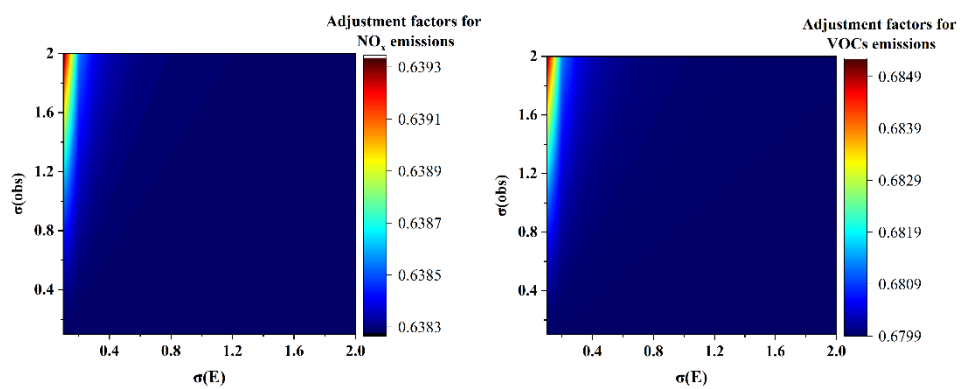

**ig. S4. Sensitivities of inversion results to  $A_i$  and  $R_i$  values**

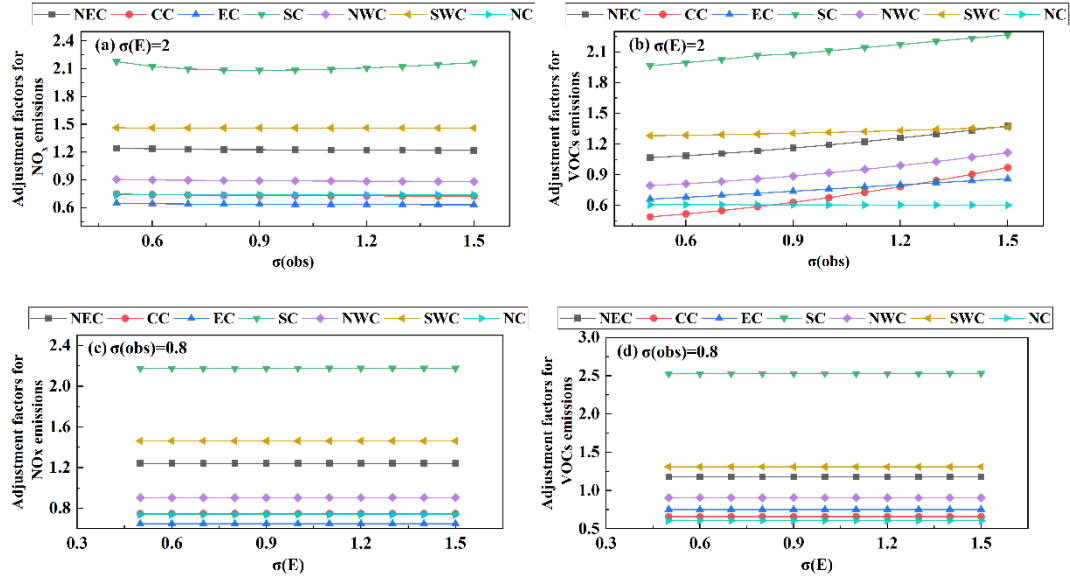

Fig. S5. Sensitivities of inversion results to  $A_i$  and  $R_i$  values under various emission and observation errors

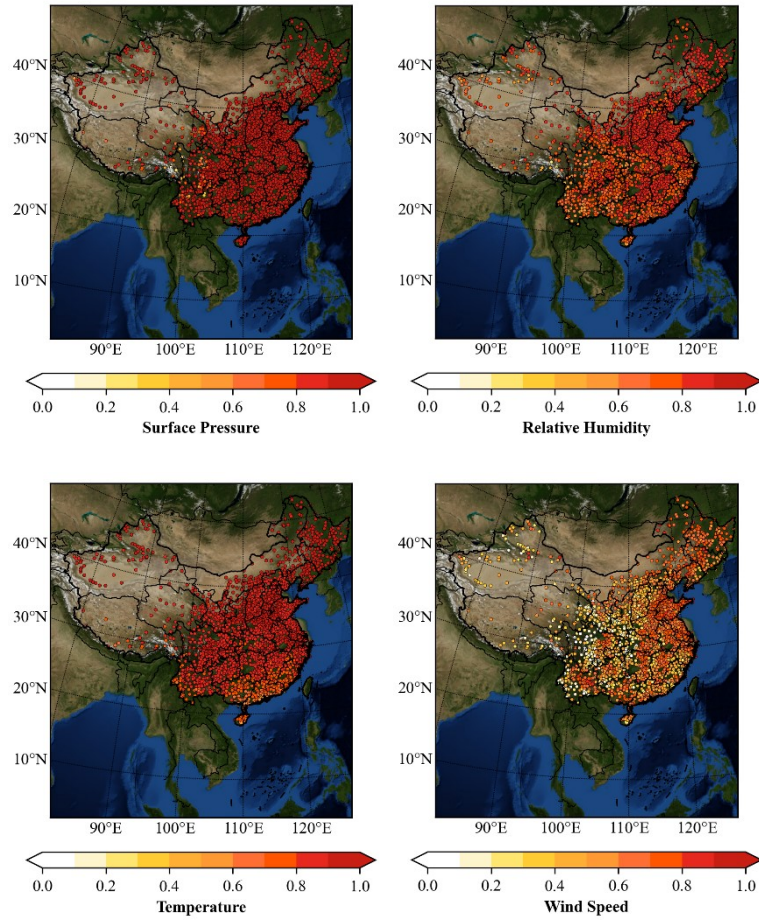

Fig. S6. Spatial distribution of correlation coefficients ( $R$ ) for simulated vs. observed meteorological parameters in China from June to September 2019. (The background map is from NASA Blue Marble)



210

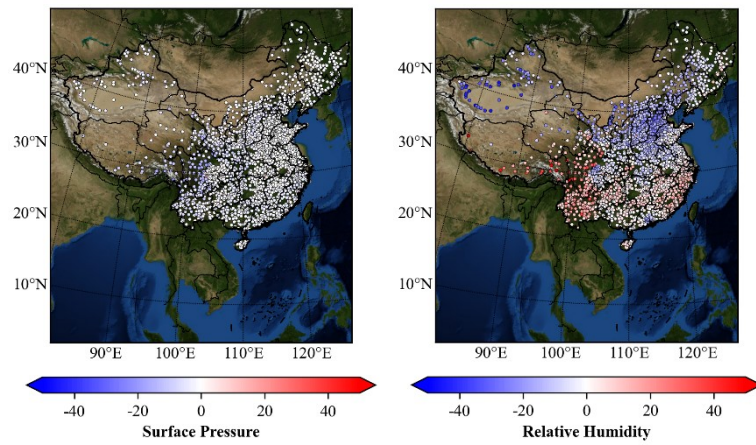

211

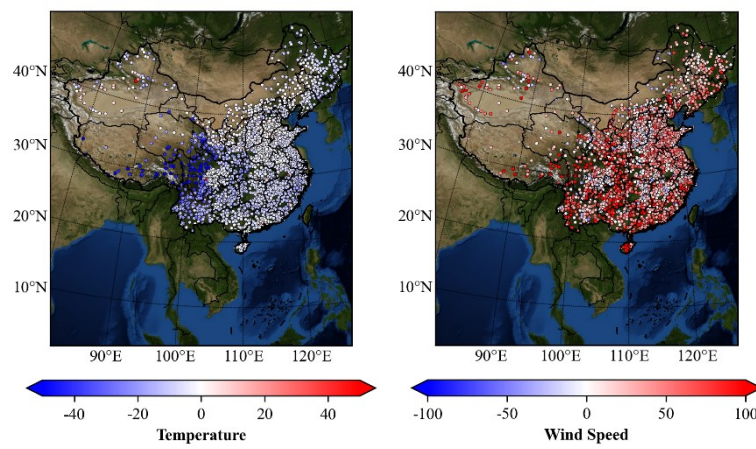

212

213 **Fig. S7. Spatial distribution of normalised mean bias (NMB) for simulated vs. observed**  
 214 **meteorological parameters in China from June to September 2019. (The background map is from**  
 215 **NASA Blue Marble)**

216

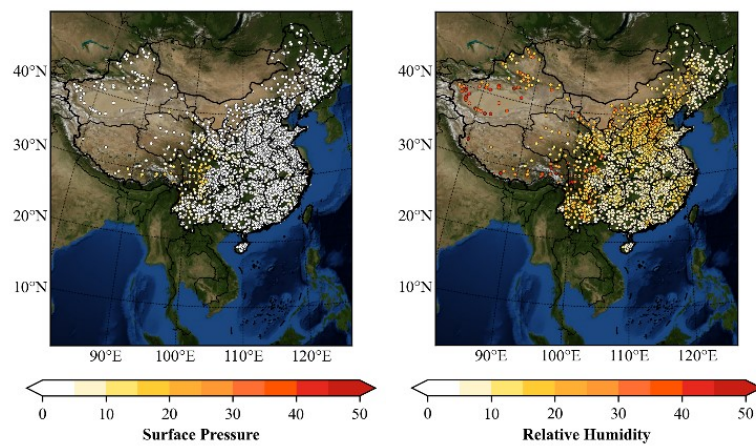

217

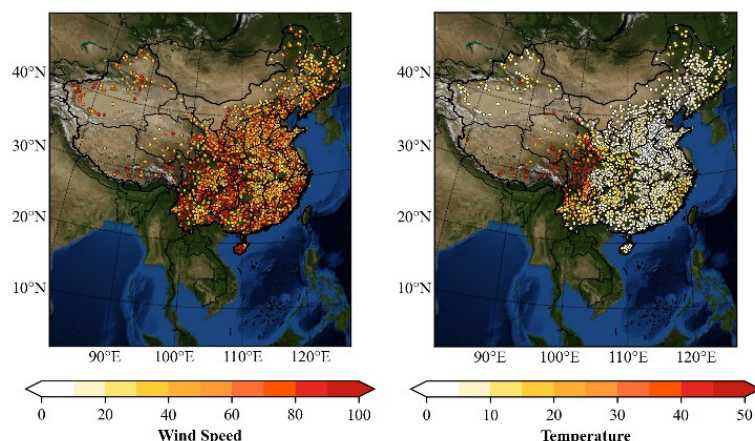

**Fig. S8. Spatial distribution of normalised mean error (NME) for simulated vs. observed meteorological parameters in China from June to September 2019. (The background map is from NASA Blue Marble)**

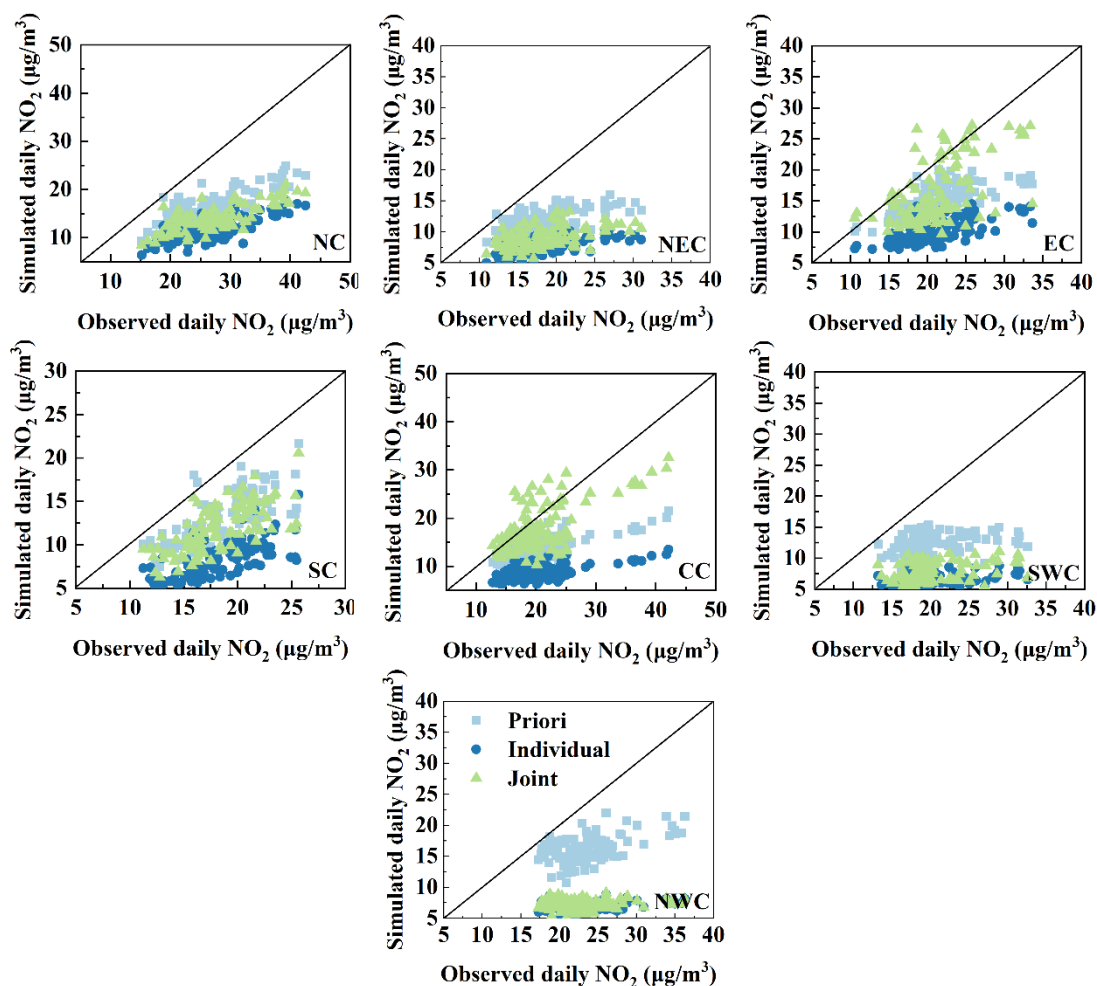

**Fig. S9. Comparisons between simulated ground-level NO<sub>2</sub> concentrations by a priori, joint inversed, and individual inversed emissions, and the observed data from monitoring stations**

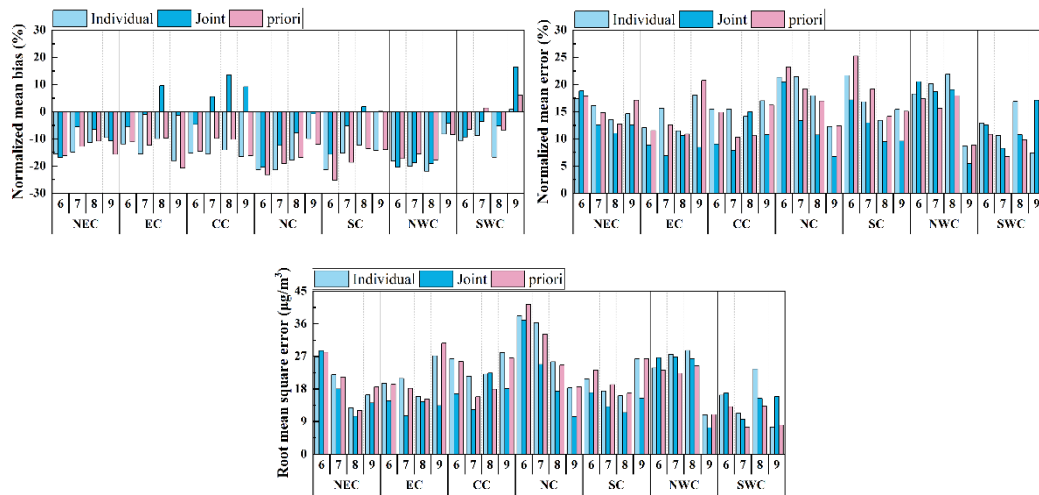

**Fig. S10. Monthly variations in normalised mean bias, normalised mean error, and root mean square error for MDA8 O<sub>3</sub> concentrations in key regions of China from June to September 2019**

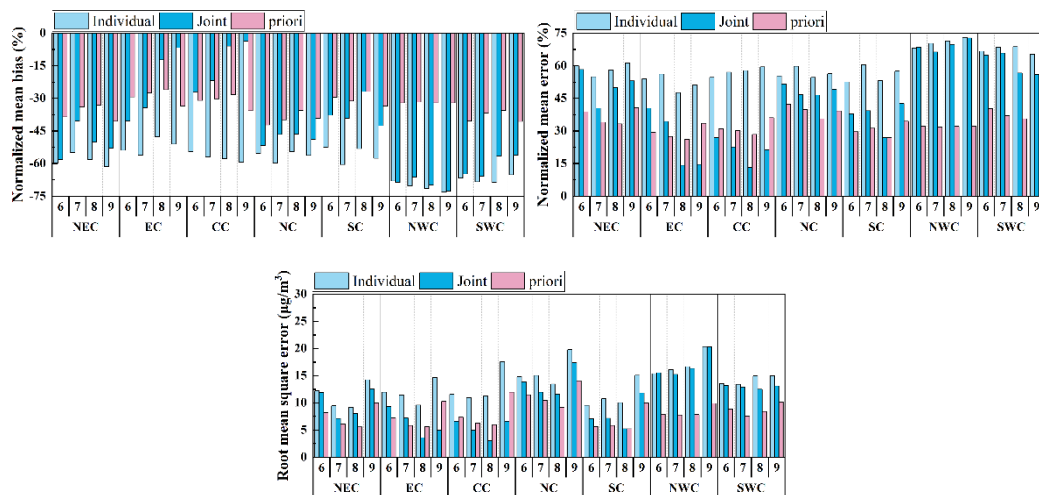

**Fig. S11. Monthly variations in normalised mean bias, normalised mean error, and root mean square error for NO<sub>2</sub> concentrations in key regions of China from June to September 2019**

**Table S1. Regional emission adjustment factors in Pseudodata test**

| Region | NO <sub>x</sub> | VOC |
|--------|-----------------|-----|
| NC     | 1.3             | 1.3 |
| NEC    | 0.8             | 0.8 |
| CC     | 1.2             | 1.2 |
| EC     | 1.6             | 1.6 |
| SC     | 0.5             | 0.5 |
| NWC    | 1.1             | 1.1 |
| SWC    | 0.7             | 0.7 |

238 **Table S2. Validation metrics for simulated and observed atmospheric pressure across different**  
239 **regions**

| Region | R    | NMB  | NME | RMSE |
|--------|------|------|-----|------|
| CC     | 0.99 | −0.9 | 1.3 | 12.4 |
| EC     | 0.98 | −0.7 | 1.1 | 10.9 |
| NC     | 0.99 | −1.2 | 1.3 | 12.3 |
| NEC    | 0.99 | −0.8 | 0.9 | 8.6  |
| NWC    | 0.96 | −2.8 | 3.3 | 27.8 |
| SC     | 0.98 | −1.4 | 1.5 | 14.8 |
| SWC    | 0.92 | −3.9 | 4.3 | 35.2 |

240 **Table S3. Validation metrics for simulated and observed temperature across different regions**

| Region | R    | NMB   | NME  | RMSE |
|--------|------|-------|------|------|
| CC     | 0.88 | −4.9  | 7.3  | 2.2  |
| EC     | 0.87 | −5.9  | 7.8  | 2.3  |
| NC     | 0.91 | −1.9  | 6.2  | 1.7  |
| NEC    | 0.94 | −6.3  | 8.0  | 1.9  |
| NWC    | 0.90 | −8.1  | 13.1 | 2.6  |
| SC     | 0.72 | −4.9  | 6.6  | 2.1  |
| SWC    | 0.85 | −16.9 | 18.1 | 4.0  |

241

242 **Table S4. Validation metrics for simulated and observed relative humidity across different**  
243 **regions**

| Region | R    | NMB   | NME  | RMSE |
|--------|------|-------|------|------|
| CC     | 0.82 | −4.7  | 11.5 | 10.1 |
| EC     | 0.82 | 1.5   | 9.8  | 9.1  |
| NC     | 0.85 | −14.5 | 17.4 | 13.2 |
| NEC    | 0.85 | −2.7  | 8.5  | 8.1  |
| NWC    | 0.79 | −10.8 | 17.5 | 12.5 |
| SC     | 0.76 | 0.4   | 7.7  | 7.7  |
| SWC    | 0.73 | 7.8   | 13.8 | 11.8 |

244



**Table S5. Validation metrics for simulated and observed wind speed across different regions**

| Region | R    | NMB  | NME  | RMSE |
|--------|------|------|------|------|
| CC     | 0.62 | 29.0 | 51.6 | 1.2  |
| EC     | 0.66 | 37.5 | 55.3 | 1.3  |
| NC     | 0.61 | 23.4 | 51.2 | 1.3  |
| NEC    | 0.68 | 31.9 | 48.6 | 1.4  |
| NWC    | 0.52 | 37.7 | 63.8 | 1.6  |
| SC     | 0.59 | 56.4 | 70.9 | 1.6  |
| SWC    | 0.57 | 44.0 | 66.9 | 1.4  |

**Table S6. Model performance statistics for simulated NO<sub>2</sub> concentrations against observations over China (*R* – correlation, NMB – normalized absolute bias, NME – normalized absolute error, MB – mean bias, ME – mean error, RMSE – root mean square error, Obs. – observation mean, Mod. – model mean)**

|            |     | <i>R</i> | NMB   | NME  | MB    | ME   | RMSE | Obs. | Mod. |
|------------|-----|----------|-------|------|-------|------|------|------|------|
| Individual |     | 0.57     | −58.5 | 58.5 | −10.9 | 10.9 | 11.3 | 18   | 8    |
| Joint      | NEC | 0.51     | −50.4 | 50.4 | −9.4  | 9.4  | 9.9  | 18   | 9    |
| Priori     |     | 0.58     | −36.6 | 36.6 | −6.8  | 6.9  | 7.4  | 18   | 12   |
| Individual |     | 0.61     | −56.5 | 56.5 | −15.3 | 15.3 | 15.8 | 27   | 12   |
| Joint      | NC  | 0.60     | −48.5 | 48.5 | −13.2 | 13.2 | 13.7 | 27   | 14   |
| Priori     |     | 0.61     | −39.2 | 39.2 | −10.6 | 10.6 | 11.3 | 27   | 16   |
| Individual |     | 0.66     | −52.2 | 52.2 | −11.3 | 11.3 | 11.9 | 22   | 10   |
| Joint      | EC  | 0.66     | −23.5 | 25.9 | −4.9  | 5.5  | 6.3  | 22   | 17   |
| Priori     |     | 0.68     | −29.1 | 29.1 | −6.4  | 6.4  | 7.2  | 22   | 15   |
| Individual |     | 0.74     | −55.9 | 55.9 | −10.8 | 10.8 | 11.3 | 19   | 8    |
| Joint      | SC  | 0.75     | −36.6 | 36.6 | −7.1  | 7.1  | 7.8  | 19   | 12   |
| Priori     |     | 0.75     | −30.3 | 30.5 | −5.9  | 5.9  | 6.6  | 19   | 13   |
| Individual |     | 0.44     | −57.2 | 57.2 | −12.1 | 12.1 | 12.8 | 21   | 9    |
| Joint      | CC  | 0.45     | −14.6 | 21.0 | −2.9  | 4.4  | 5.3  | 21   | 18   |
| Priori     |     | 0.45     | −31.3 | 31.4 | −6.7  | 6.7  | 7.9  | 21   | 14   |
| Individual |     | 0.42     | −70.7 | 70.7 | −16.8 | 16.8 | 17.1 | 24   | 7    |
| Joint      | NWC | 0.39     | −69.3 | 69.3 | −16.5 | 16.5 | 16.8 | 24   | 7    |
| Priori     |     | 0.46     | −32.0 | 32.0 | −7.6  | 7.6  | 8.3  | 24   | 16   |
| Individual |     | 0.35     | −67.3 | 67.3 | −13.7 | 13.7 | 14.2 | 20   | 7    |
| Joint      | SWC | 0.35     | −60.8 | 60.8 | −12.3 | 12.3 | 12.9 | 20   | 8    |
| Priori     |     | 0.34     | −38.4 | 38.4 | −7.8  | 7.8  | 8.7  | 20   | 13   |

254 **Table S7. Model performance statistics for simulated daily NO<sub>2</sub> column concentrations and daily**  
 255 **HCHO column concentrations against TROPOMI satellite data over China from June to**  
 256 **September (*R* – correlation, NMB – normalized absolute bias, NME – normalized absolute error)**

|            |     | HCHO     |        |       | NO <sub>2</sub> |        |       |
|------------|-----|----------|--------|-------|-----------------|--------|-------|
|            |     | <i>R</i> | NMB    | NME   | <i>R</i>        | NMB    | NME   |
| Priori     |     | 0.62     | -41.97 | 42.03 | 0.41            | -12.40 | 20.07 |
| Individual | NEC | 0.69     | -31.34 | 32.10 | 0.15            | -38.09 | 38.67 |
| Joint      |     | 0.80     | -30.08 | 30.61 | 0.57            | -25.92 | 26.86 |
| Priori     |     | 0.51     | -32.92 | 32.92 | 0.20            | -35.08 | 36.14 |
| Individual | NC  | 0.61     | -24.81 | 25.23 | 0.34            | -58.47 | 58.47 |
| Joint      |     | 0.63     | -22.20 | 22.89 | 0.34            | -52.16 | 52.22 |
| Priori     |     | 0.73     | -44.67 | 44.67 | 0.27            | -26.27 | 28.83 |
| Individual | EC  | 0.77     | -31.26 | 31.26 | 0.21            | -59.49 | 59.49 |
| Joint      |     | 0.67     | -26.27 | 27.03 | 0.13            | -52.68 | 52.91 |
| Priori     |     | 0.68     | -48.21 | 48.21 | 0.34            | 18.62  | 27.48 |
| Individual | SC  | 0.67     | -34.18 | 34.18 | 0.29            | -37.27 | 38.99 |
| Joint      |     | 0.38     | -19.13 | 26.47 | 0.21            | -20.51 | 29.29 |
| Priori     |     | -0.06    | -35.14 | 36.83 | 0.17            | 29.84  | 50.27 |
| Individual | CC  | 0.22     | -17.95 | 28.87 | 0.43            | -33.77 | 37.27 |
| Joint      |     | 0.88     | -21.93 | 24.27 | 0.83            | -13.64 | 20.03 |
| Priori     |     | 0.20     | -36.25 | 40.69 | 0.65            | 10.46  | 21.33 |
| Individual | NWC | 0.41     | -20.20 | 31.17 | 0.22            | -30.64 | 36.66 |
| Joint      |     | 0.74     | -10.02 | 21.27 | 0.75            | -9.79  | 18.82 |
| Priori     |     | 0.22     | -35.24 | 38.14 | 0.05            | -47.30 | 48.97 |
| Individual | SWC | 0.21     | -35.61 | 38.54 | 0.10            | -55.63 | 56.20 |
| Joint      |     | 0.13     | -34.20 | 37.51 | 0.10            | -54.23 | 54.83 |
