# Supplementary material for: Kalman filter inversions on NO x and VOCs emissions in China using TROPOMI satellite observations
Source: Copernicus journal article supplement (doi:10.5194/egusphere-2025-2687), 2025-08-27
Supplement: Supplementary file 3 [file Fig7.xlsx]

## Sheet: EC
obs.	Priori	Individual	Joint
158.102	128.02	135.572	146.266
155.935	146.117	143.582	157.216
159.541	156.196	151.75	166.015
168.595	171.195	164.651	180.667
154.285	158.013	152.774	166.476
92.892	86.5784	85.3468	91.2088
134.312	122.718	119.445	128.373
140.955	134.289	128.711	140.464
145.822	133.139	127.651	139.322
138.305	136.696	130.361	140.58
158.694	139.213	134.949	143.844
117.804	79.1505	85.0979	85.895
154.527	121.491	119.018	127.542
187.01	151.119	146.134	158.667
164.135	144.122	139.94	151.011
142.347	104.963	108.145	113.596
110.134	85.1514	89.8909	93.8944
108.104	106.127	110.478	118.517
97.6104	92.3049	97.3277	103.636
116.486	101.248	103.097	109.294
117.555	98.7877	101.105	103.972
142.746	119.16	116.633	120.618
140.416	117.436	114.405	120.471
105.854	90.016	90.6	94.8915
109.75	95.8977	97.9794	104.292
144.114	144.449	137.661	151.707
134.122	113.219	111.23	121.257
116.672	104.555	105.112	115.102
124.884	120.66	122.318	133.331
131.476	124.534	125.38	138.461
141.045	116.062	114.128	128.857
138.454	97.5651	97.7989	109.517
127.906	104.405	103.952	119.622
136.388	109.109	105.973	122.804
117.226	108.235	101.515	120.048
125.533	115.531	108.819	127.362
119.762	109.219	103.457	119.867
104.236	70.9893	75.3581	82.3459
98.4467	74.0055	77.0259	85.3012
133.467	116.72	109.937	129.743
106.432	100.571	99.7045	116.055
119.84	100.262	99.1561	114.804
144.332	138.752	129.583	154.855
151.427	144.097	133.037	159.294
128.292	128.711	121.571	143.765
97.9778	70.4707	75.0725	84.814
93.0245	79.5385	82.3077	93.4899
77.7044	80.6047	80.0621	90.5194
110.678	107.985	103.978	122.46
149.862	143.488	133.581	160.592
139.335	136.035	126.583	152.09
116.912	100.194	96.0941	114.967
126.71	107.071	101.552	121.896
119.717	107.792	102.392	123.857
134.983	115.848	108.641	132.285
120.328	102.693	96.4972	116.821
126.839	101.027	95.3735	114.868
119.514	106.603	100.016	120.837
117.604	99.6305	95.7547	114.354
121.299	107.286	103.119	124.474
101.963	100.131	98.9868	120.599
87.6222	83.5667	85.1258	101.535
93.4502	91.3236	92.1372	111.405
74.2164	76.1765	79.27	93.5352
80.8713	83.409	85.2748	101.135
99.7561	92.2977	92.9016	113.769
105.104	86.6448	88.7402	110.239
93.3608	90.6266	92.9049	112.501
66.5195	78.8761	81.0209	93.1036
58.4216	55.7724	58.114	61.2702
82.8477	73.0982	74.0488	88.3407
107.735	91.5894	91.5999	111.575
128.971	121.283	120.17	149.226
139.39	134.495	130.473	161.691
142.914	136.354	130.621	161.953
164.939	154.284	148.003	188.742
161.853	134.026	130.568	163.891
160.142	142.454	139.928	172.055
158.541	142.492	138.547	170.856
150.09	125.42	122.422	149.478
164.973	138.071	135.145	168.643
0	134.679	132.679	162.865
0	124.019	123.6	150.414
0	101.662	103.943	124.071
108.078	77.3795	80.4915	93.725
99.8467	79.5916	81.3953	97.538
103.34	85.1296	88.4236	106.107
114.135	94.5372	98.1086	117.445
110.149	100.714	103.607	123.85
0	129.624	127.302	154.649
138.09	125.033	121.872	147.351
107.032	84.1887	86.9799	99.5329
96.2171	73.3189	77.5026	86.0819
0	66.145	72.5126	82.0314
94.7981	75.6959	84.5777	101.244
105.223	84.9188	91.8111	111.132
110.335	89.1591	94.0261	114.049
161.391	116.828	117.406	145.217
183.621	163.828	160.752	203.754
150.761	127.019	127.193	157.952
138.386	122.811	124.188	153.967
122.451	115.346	117.948	144.296
133.779	103.414	107.374	131.187
135.555	113.077	117.298	148.173
118.91	107.733	112.005	137.853
113.433	97.8723	101.895	120.439
136.533	111.23	114.438	134.813
129.462	100.988	107.399	124.002
134.345	97.9344	100.484	113.036
113.463	89.543	94.1656	104.62
124.511	85.7241	92.5923	103.764
0	81.9241	85.3218	93.5523
0	81.5594	82.61	89.497
144.178	99.1913	102.769	116.305
177.059	134.935	138.846	167.355
178.103	136.935	140.85	169.134
154.258	117.64	122.105	145.138
156.591	109.516	115.177	139.189
166.72	120.25	124.507	154.875
165.998	130.078	133.696	169.44
148.872	123.263	126.598	158.719

## Sheet: NEC
obs.	Priori	Individual	Joint
0	137.357	140.154	153.227
146.311	146.514	144.945	157.26
155.657	153.061	151.865	163.789
162.09	153.464	151.752	166.026
112.607	109.558	108.727	118.94
120.97	126.145	120.848	135.121
143.359	141.916	136.96	158.417
128.944	114.596	113.448	129.678
137.915	110.052	110.753	123.971
141.071	131.031	129.788	146.445
150.315	141.361	138.863	153.812
154.848	91.8129	91.8525	101.8
184.574	123.348	121.601	142.16
170.949	128.478	125.329	145.932
127.809	107.196	106.615	119.92
111.08	95.7038	94.7606	104.581
126.495	102.352	103.243	119.278
109.05	88.1458	90.8893	106.658
88.3116	71.1538	72.0334	80.7936
99.4745	81.024	82.7963	91.6696
123.515	94.0515	97.3538	107.21
147.784	131.217	127.991	140.013
157.35	131.086	126.334	140.538
161.08	129.895	125.876	143.518
170.09	146.654	138.853	163.339
146.86	123.573	118.572	140.943
98.4495	75.4019	79.6417	91.3025
104.239	102.475	107.739	119.443
131.827	105.517	109.92	121.903
160.086	132.667	134.423	155.055
186.667	157.585	150.188	178.183
189.513	146.038	136.936	169.794
117.905	98.7573	94.8154	111.791
122.829	104.375	98.4522	120.462
116.065	118.259	110.057	130.889
128.025	122.616	115.002	140.294
107.879	89.376	87.6041	104.564
0	103.574	97.2884	117.259
131.578	121.752	113.643	141.89
135.276	135.745	123.145	156.09
95.904	99.0438	92.7628	111.437
126.768	120.723	114.153	142.372
136.424	138.395	128.392	163.605
142.98	135.605	124.767	160.006
134.316	117.92	108.488	136.366
111.721	98.5714	93.2002	114.644
110.75	100.669	95.7914	118.579
134.132	123.617	115.425	145.44
148.719	130.773	121.684	156.108
128.858	129.039	118.624	155
117.369	108.105	98.243	129.291
107.157	92.6019	87.7454	108.328
119.408	102.108	96.227	119.41
116.747	103.581	96.4392	120.622
110.838	103.506	94.9406	121.609
105.526	95.2838	86.4094	112.312
110.163	95.9976	87.3966	114.589
108.263	91.7876	83.9803	108.738
104.643	94.8279	92.6229	117.839
111.416	95.9605	91.4295	120.734
106.897	94.1545	88.9354	120.16
92.3655	90.0117	86.4932	114.076
107.864	98.9441	95.9311	126.458
117.515	106.123	102.167	136.109
122.885	120.806	114.403	158.551
121.132	117.502	111.845	154.154
111.753	110.574	106.359	145.521
124.036	122.814	117.086	159.199
126.322	131.03	125.065	169.746
104.794	105.497	102.21	133.933
124.944	124.969	118.087	153.054
136.898	120.918	114.335	144.005
145.843	133.471	124.7	162.173
148.065	134.827	125.816	166.226
158.255	151.583	141.914	189.448
158.305	143.695	134.066	175.944
156.548	133.648	125.816	168.087
167.37	142.178	132.963	181.035
169.536	152.484	143.331	191.164
178.631	154.775	145.513	193.707
150.801	121.84	117.538	155.142
0	136.131	128.869	170.561
0	127.75	124.595	161.999
0	138.959	134.298	176.447
157.475	114.815	112.291	147.496
125.411	91.6529	91.1735	115.364
94.2132	86.2971	89.3941	114.753
113.434	96.0455	97.3002	121.902
131.897	99.7812	101.077	126.095
0	117.993	115.735	149.131
141.288	125.591	121.026	156.332
134.152	127.887	122.886	158.291
119.439	97.3589	97.2703	123.676
0	120.189	115.597	155.069
156.46	124.943	120.41	162.719
161.05	125.316	121.288	165.702
170.995	136.701	132.296	183.574
189.92	157.063	151.205	209.288
190.123	158.617	152.857	214.615
177.419	154.081	148.122	197.637
149.51	114.631	113.845	144.087
127.299	107.281	106.7	132.835
125.191	108.668	110.588	146.624
127.633	114.072	114.711	152.301
102.899	98.2705	104.403	134.872
109.668	94.254	99.3335	126.455
96.841	96.0716	101.75	128.83
97.441	94.5513	101.209	127.015
105.005	97.2502	102.806	122.224
119.312	79.9268	88.3266	107.084
126.818	92.9324	99.4527	119.91
0	119.796	119.392	147.446
0	114.342	114.093	139.285
168.462	130.098	129.619	161.849
162.692	133.776	134.653	167.088
163.645	132.466	134.296	170.894
171.213	148.314	146.301	190.816
174	147.966	144.583	190.284
184.874	153.282	147.486	198.844
190.98	160.599	153.801	210.684
184.97	155.599	150.275	205.119

## Sheet: CC
obs.	Priori	Individual	Joint
0	137.357	140.154	153.227
146.311	146.514	144.945	157.26
155.657	153.061	151.865	163.789
162.09	153.464	151.752	166.026
112.607	109.558	108.727	118.94
120.97	126.145	120.848	135.121
143.359	141.916	136.96	158.417
128.944	114.596	113.448	129.678
137.915	110.052	110.753	123.971
141.071	131.031	129.788	146.445
150.315	141.361	138.863	153.812
154.848	91.8129	91.8525	101.8
184.574	123.348	121.601	142.16
170.949	128.478	125.329	145.932
127.809	107.196	106.615	119.92
111.08	95.7038	94.7606	104.581
126.495	102.352	103.243	119.278
109.05	88.1458	90.8893	106.658
88.3116	71.1538	72.0334	80.7936
99.4745	81.024	82.7963	91.6696
123.515	94.0515	97.3538	107.21
147.784	131.217	127.991	140.013
157.35	131.086	126.334	140.538
161.08	129.895	125.876	143.518
170.09	146.654	138.853	163.339
146.86	123.573	118.572	140.943
98.4495	75.4019	79.6417	91.3025
104.239	102.475	107.739	119.443
131.827	105.517	109.92	121.903
160.086	132.667	134.423	155.055
186.667	157.585	150.188	178.183
189.513	146.038	136.936	169.794
117.905	98.7573	94.8154	111.791
122.829	104.375	98.4522	120.462
116.065	118.259	110.057	130.889
128.025	122.616	115.002	140.294
107.879	89.376	87.6041	104.564
0	103.574	97.2884	117.259
131.578	121.752	113.643	141.89
135.276	135.745	123.145	156.09
95.904	99.0438	92.7628	111.437
126.768	120.723	114.153	142.372
136.424	138.395	128.392	163.605
142.98	135.605	124.767	160.006
134.316	117.92	108.488	136.366
111.721	98.5714	93.2002	114.644
110.75	100.669	95.7914	118.579
134.132	123.617	115.425	145.44
148.719	130.773	121.684	156.108
128.858	129.039	118.624	155
117.369	108.105	98.243	129.291
107.157	92.6019	87.7454	108.328
119.408	102.108	96.227	119.41
116.747	103.581	96.4392	120.622
110.838	103.506	94.9406	121.609
105.526	95.2838	86.4094	112.312
110.163	95.9976	87.3966	114.589
108.263	91.7876	83.9803	108.738
104.643	94.8279	92.6229	117.839
111.416	95.9605	91.4295	120.734
106.897	94.1545	88.9354	120.16
92.3655	90.0117	86.4932	114.076
107.864	98.9441	95.9311	126.458
117.515	106.123	102.167	136.109
122.885	120.806	114.403	158.551
121.132	117.502	111.845	154.154
111.753	110.574	106.359	145.521
124.036	122.814	117.086	159.199
126.322	131.03	125.065	169.746
104.794	105.497	102.21	133.933
124.944	124.969	118.087	153.054
136.898	120.918	114.335	144.005
145.843	133.471	124.7	162.173
148.065	134.827	125.816	166.226
158.255	151.583	141.914	189.448
158.305	143.695	134.066	175.944
156.548	133.648	125.816	168.087
167.37	142.178	132.963	181.035
169.536	152.484	143.331	191.164
178.631	154.775	145.513	193.707
150.801	121.84	117.538	155.142
0	136.131	128.869	170.561
0	127.75	124.595	161.999
0	138.959	134.298	176.447
157.475	114.815	112.291	147.496
125.411	91.6529	91.1735	115.364
94.2132	86.2971	89.3941	114.753
113.434	96.0455	97.3002	121.902
131.897	99.7812	101.077	126.095
0	117.993	115.735	149.131
141.288	125.591	121.026	156.332
134.152	127.887	122.886	158.291
119.439	97.3589	97.2703	123.676
0	120.189	115.597	155.069
156.46	124.943	120.41	162.719
161.05	125.316	121.288	165.702
170.995	136.701	132.296	183.574
189.92	157.063	151.205	209.288
190.123	158.617	152.857	214.615
177.419	154.081	148.122	197.637
149.51	114.631	113.845	144.087
127.299	107.281	106.7	132.835
125.191	108.668	110.588	146.624
127.633	114.072	114.711	152.301
102.899	98.2705	104.403	134.872
109.668	94.254	99.3335	126.455
96.841	96.0716	101.75	128.83
97.441	94.5513	101.209	127.015
105.005	97.2502	102.806	122.224
119.312	79.9268	88.3266	107.084
126.818	92.9324	99.4527	119.91
0	119.796	119.392	147.446
0	114.342	114.093	139.285
168.462	130.098	129.619	161.849
162.692	133.776	134.653	167.088
163.645	132.466	134.296	170.894
171.213	148.314	146.301	190.816
174	147.966	144.583	190.284
184.874	153.282	147.486	198.844
190.98	160.599	153.801	210.684
184.97	155.599	150.275	205.119

## Sheet: NC
obs.	Priori	Individual	Joint
0	121.205	126.726	123.369
169.011	120.081	125.325	124.2
157.35	109.529	114.846	112.626
154.889	128.676	131.639	130.336
123.094	108.25	113.603	113.608
142.927	131.933	132.107	134.975
165.753	139.007	141.179	142.769
145.583	103.998	108.652	106.461
141.039	100.32	104.195	101.926
170.802	130.586	134.729	133.369
195.891	152.039	155.268	157.456
169.432	90.6999	97.6893	96.0964
175.232	114.36	120.464	118.028
177.298	124.049	129.187	129.767
131.536	101.82	107.469	106.631
167.397	141.079	142.352	146.162
212.633	158.633	159.867	166.045
184.994	144.528	148.461	154.082
180.067	142.771	144.163	147.466
164.876	140.074	141.64	142.799
181.006	147.644	148.855	149.237
183.006	158.975	160.524	160.961
200.333	166.164	165.258	171.35
203.944	153.491	153.512	160.334
197.33	142.178	144.024	150.15
182.782	139.178	141.555	149.551
142.534	118.503	119.919	122.463
136.424	90.9927	97.2149	96.1596
117.808	90.771	93.7965	91.136
152.905	105.781	108.456	111.227
171.821	125.3	123.809	132.271
184.587	127.335	125.683	136.491
203.41	148.832	142.72	155.057
167.854	129.01	122.768	134.909
111.056	89.5793	87.8682	94.4488
133.517	106.554	103.914	114.672
152.736	120.015	115.642	128.855
0	108.692	106.385	117.414
135.59	101.356	100.524	110.823
156.411	121.736	117.208	131.593
177.251	144.635	139.1	157.296
175.537	137.661	135.472	152.141
176.394	143.039	139.451	156.362
187.531	159.684	154.002	175.858
155.601	141.491	135.74	158.263
146.135	137.85	130.734	150.863
173.107	153.483	145.378	168.073
157.421	137.016	131.74	151.737
123.101	106.401	106.954	117.832
171.337	143.452	141.229	157.083
132.5	130.566	124.837	145.541
156.884	125.4	120.568	130.88
165.655	130.601	126.663	136.64
170.567	128.67	125.411	134.999
194.173	159.39	152.83	170.241
167.376	144.185	135.683	158.607
154.174	133.78	128.817	147.793
113.35	91.3587	91.0579	101.447
153.469	121.849	123.093	133.134
167.199	123.404	123.662	137.048
170.126	145.624	141.597	162.1
142.331	132.087	125.765	145.842
132.149	124.973	119.071	135.567
109.598	95.9283	94.5567	108.491
120.566	106.418	104.859	121.818
133	119.186	118.486	135.785
132.17	117.419	116.201	132.217
152.051	147.167	141.872	161.769
125.095	121.485	119.031	139.178
125.292	113.66	111.618	124.778
84.5333	76.8837	77.4412	83.3958
101.921	77.4874	75.9252	80.9457
104.642	83.4349	81.6162	88.753
122.95	92.5312	90.6834	97.6396
160.944	121.374	118.497	127.513
112.75	71.2076	72.1085	75.5991
109.388	76.4917	77.7038	82.1168
154.944	115.937	116.788	131.009
182.859	144.56	139.929	170.166
137.492	93.4889	93.9293	113.818
112.196	75.6332	77.6601	82.4002
0	71.6387	77.6182	84.0344
0	67.0538	74.0708	81.5301
0	94.9816	96.2126	106.338
135.503	121.265	121.361	137.299
111.949	104.601	107.216	122.882
110.721	89.2883	91.1041	97.1501
90.8222	72.6405	73.6976	77.1724
93.1602	74.4662	73.3851	77.276
0	85.6282	86.1385	91.9748
136.624	112.507	112.501	123.604
155.494	134.24	133.457	149.963
168.217	147.784	145.358	165.212
0	146.26	144.123	164.462
160.413	142.392	139.859	158.568
173.228	144.455	143.268	162.356
183.5	155.983	153.238	178.035
179.778	153.736	150.779	171.723
179.393	143.164	141.986	159.203
155.983	142.565	140.901	168.395
103.179	88.7215	91.6868	103.049
70.1611	69.7781	76.7622	79.3969
66.5618	66.0117	74.9546	78.9372
76.118	66.1894	70.3585	73.3882
85.3652	78.2379	87.9163	88.6677
107.739	91.1867	101.738	104.692
108.178	85.8384	93.5799	96.5857
108.389	104.218	111.99	117.774
99.1966	81.1269	88.3991	90.6395
89.0341	83.0265	95.2909	101.486
93.3722	100.34	106.883	114.076
0	105.95	110.258	116.547
0	107.871	111.672	116.287
128.459	112.155	114.409	118.152
111.961	83.4864	90.6131	91.558
132.757	107.345	114.196	118.266
147.972	125.704	130.928	141.519
152.494	142.965	143.467	160.733
158.894	151.827	146.053	168.501
157.939	145.743	139.938	160.85
164.485	146.397	140.428	166.951

## Sheet: SC
obs.	Priori	Individual	Joint
0	40.9493	51.3327	55.3603
64.5633	54.8771	61.891	66.5153
92.5316	80.0421	82.403	89.1762
79.3522	68.755	70.4741	76.2
49.0881	25.8458	33.4421	34.9592
58.3228	29.3822	35.615	36.6902
65.5669	55.1022	57.2288	62.0065
66.5987	55.5679	56.5989	61.1279
65.2075	45.4673	47.3808	49.9765
60.9937	39.6528	44.5304	46.0713
65.981	38.83	52.0162	56.3751
88.1709	68.1529	72.6213	73.9583
127.491	102.109	98.9663	109.567
138.335	116.339	110.572	120.986
128.949	83.9147	84.7919	89.871
105.252	69.6163	72.211	76.355
65.4969	52.0083	56.912	59.2219
65.2893	65.6415	67.8899	72.5645
65.4937	64.2772	65.573	69.8933
71.7358	58.8614	59.5325	63.6861
75.2138	56.5562	56.9535	61.0911
60.7736	54.8258	56.6478	60.57
54.7532	43.365	53.3463	57.18
89.9371	46.6113	53.4127	57.7711
79.8228	49.0839	54.0526	58.5495
88.1146	51.6438	55.1377	59.3417
89.656	62.81	64.3284	69.7717
95.5669	73.4498	72.3525	79.4715
99.5287	76.4637	76.9199	83.8703
97.3013	80.9821	80.4815	92.3542
84.943	82.7545	82.9778	95.3304
65.7785	61.224	65.6496	69.9757
63.4777	67.9179	69.8255	76.0249
72.2721	70.7005	71.5747	79.2443
78.2704	75.3112	75.1804	83.7816
70.0063	63.3168	65.5888	70.7072
70.9681	55.1959	59.4641	62.9648
0	58.6253	60.6956	65.5614
61.717	63.3443	71.338	80.6565
71.7911	54.977	62.955	69.5198
66.5031	50.9661	55.1356	58.3498
70.0255	44.4702	48.4464	50.5745
72	48.0579	52.9151	56.514
82.6178	59.5444	63.5314	70.5895
109.094	90.7008	87.6674	103.229
136.428	105.477	98.7232	118.244
115.17	81.6072	77.9756	91.9711
92.8917	74.8012	73.2702	86.5938
91.8217	45.7437	50.9891	56.4708
73.4808	39.7568	47.0637	49.9568
72.3608	38.6783	48.1908	51.0187
70.3121	51.0965	57.5237	62.3916
64.532	57.5959	61.6716	67.5833
76.3567	70.518	72.2223	80.9367
85.6899	76.5282	76.0237	86.3043
93.5975	83.7165	82.8936	95.0889
73.8428	65.3266	70.6594	79.6513
73.2152	56.6732	62.2564	69.9033
64.1076	60.7198	64.1764	73.4004
52.7862	52.6389	55.9395	60.5155
48.1258	42.5159	46.9227	46.2224
52.2025	46.3993	53.231	54.1806
55.8235	53.862	61.7358	64.8917
93.8418	65.8553	73.2325	79.4032
121.436	107.384	106.308	124.817
107.677	105.549	103.15	122.391
136.567	107.726	104.744	124.83
124.222	103.08	102.604	122.605
133.026	110.773	110.041	134.872
121.704	116.911	111.734	142.417
103.327	94.6053	91.7218	111.526
108.191	83.9288	84.7883	98.224
112.12	102.716	101.292	117.372
127.064	112.292	108.047	125.093
122.692	110.115	105.142	125.267
107.974	84.9447	85.4208	97.7921
75.0506	49.6184	55.5023	58.4037
67.026	44.9274	51.3773	53.0377
109.299	80.8698	85.3334	99.7501
114.892	102.926	102.578	120.812
132.421	105.066	104.767	123.093
0	123.275	119.294	141.009
0	128.022	122.538	148.574
0	120.22	117.885	144.596
96.9057	97.0127	97.6374	120.584
78.0446	82.8601	81.1184	97.8385
66.7215	58.8509	64.2294	69.4181
105.818	95.2279	99.0505	115.958
79.8113	82.0014	84.3589	99.3706
0	61.4503	68.6509	75.7942
69.9623	60.0507	67.8561	72.9994
81.2579	71.1912	75.8196	84.3982
58.8113	63.9351	69.8685	77.3846
0	84.2492	86.9635	100.601
77.7532	67.3041	72.8734	82.2667
86.962	71.7493	77.1705	86.7545
113.146	96.6031	98.5841	115.49
145.335	126.699	122.704	148.944
129.764	131.925	125.885	147.021
109.127	104.977	103.248	115.219
93.7547	88.3517	89.4074	99.0718
117.616	97.813	98.1996	109.437
143.405	126.12	121.747	137.374
126.167	124.166	120.358	134.514
102.474	111.477	111.017	125.686
126.846	129.02	124.66	148.015
131.975	129.327	125.705	153.479
134.893	134.239	130.506	160.412
146.673	137.21	133.006	163.164
149.516	126.99	124.554	147.134
148.868	122.109	122.678	144.322
0	111.862	114.136	135.414
0	106.003	106.638	123.712
154.818	109.474	109.133	125.571
167	126.946	127.741	147.654
182.139	136.478	135.988	159.993
188.943	142.679	142.489	168.067
187.013	144.811	144.044	170.73
186.65	142.36	143.247	170.532
185.456	141.534	142.559	171.209
182.579	138.968	141.151	169.717

## Sheet: NWC
obs.	Priori	Individual	Joint
0	108.879	105.853	99.1661
124.208	106.156	103.116	97.806
132.146	113.79	109.852	103.616
128.423	110.626	107.863	102.16
116	103.072	101.841	97.5945
130.593	118.864	112.973	108.4
130.44	112.579	105.908	101.622
142.247	120.998	116.372	111.408
136.767	125.477	119	114.124
140.682	125.257	119.286	118.159
122.107	107.652	104.973	106.476
141.858	90.7769	92.4978	88.4852
137.125	93.7832	93.4558	92.0091
112.243	78.0025	85.7792	81.7605
129.22	100.058	101.045	98.3811
124.788	105.184	103.562	102.287
132.82	106.286	103.992	103.126
111.632	98.1535	96.1433	95.9287
106.407	83.4954	88.57	88.0904
102.403	80.4208	87.1508	84.1256
118.86	99.6299	103.228	102.092
128.126	109.649	106.479	107.787
117.98	99.0589	99.1148	98.5592
125.06	108.641	102.368	100.069
116.053	98.5348	94.7366	94.0458
104.933	82.7733	84.5129	86.166
109.752	89.9625	88.8625	85.3839
105.424	85.9553	90.9132	82.3891
126.207	100.463	100.513	93.4793
136.967	112.515	109.063	104.2
136.364	120.15	113.357	111.668
129.185	121.93	115.377	115.275
134.397	111.321	103.703	104.514
131.86	99.6169	94.3441	93.7286
133.24	92.0392	91.5983	90.5787
141.653	104.2	102.551	102.144
117.543	97.4732	95.0618	100.803
0	115.955	105.801	112.203
136.908	124.908	112.552	118.379
126.76	117.063	108.205	114.205
136.34	126.193	114.113	119.108
154.855	136.623	124.163	128.208
146.98	132.385	122.222	126.616
127.174	117.017	109.903	118.45
117.57	105.026	101.678	111.169
114.102	101.972	100.146	107.117
104.828	99.9461	99.2926	104.084
106.821	98.0843	95.1098	98.2445
131.197	112.358	104.953	105.857
117.179	100.48	95.0579	99.1882
110.567	90.613	87.1043	87.9825
126.158	106.095	99.3863	98.2046
121.302	104.843	99.6194	98.4176
138.371	112.955	107.049	105.899
135.331	109.159	99.2083	99.1299
131.033	103.679	94.9734	95.3269
118.893	97.8691	92.7802	92.2508
120.993	94.4547	93.8408	91.9062
144.651	108.431	105.337	103.687
147.142	110.848	104.687	103.942
138.27	109.322	101.382	101.848
121.02	98.6729	91.4402	98.109
109.351	91.2667	85.424	93.344
130.633	117.489	105.238	111.421
117.066	109.605	100.699	105.529
122.623	102.481	97.2846	100.707
134.313	114.394	104.278	110.368
115.351	99.2517	93.1824	101.495
119.427	104.395	98.8674	101.277
131.49	96.6168	92.2041	91.1692
134.238	88.3083	86.5268	86.1
132.067	97.1572	94.0301	93.5978
131.487	100.051	95.8662	95.4786
129.919	100.959	96.6256	96.0709
134.287	103.069	99.0259	96.6405
133.483	98.1436	96.6599	95.5809
134.362	100.27	99.0746	101.137
141.926	116.557	105.49	114.257
125.819	104.089	96.0429	108.356
100.728	81.3962	78.7773	86.8694
98.7315	68.1461	74.9182	72.4651
0	75.8725	82.3383	84.0735
0	91.0246	90.2554	97.517
0	102.504	99.89	107.673
115.839	111.269	104.083	115.241
109.939	94.9583	93.3415	103.078
109.426	95.4075	95.5452	97.6434
112.02	103.03	98.8831	99.04
121.593	107.72	102.398	101.685
0	99.7514	101.008	100.239
107.815	104.293	100.695	103.612
116.099	107.31	99.2727	105.322
119.395	113.849	104.985	116.786
0	111.902	104.184	116.338
108.331	101.749	99.1263	109.204
117.828	108.341	101.692	111.87
117.159	106.094	99.8783	110.076
123.566	111.475	105.106	115.095
118.724	109.424	101.884	111.869
100.227	82.1694	84.9722	95.0916
98.5638	87.9813	90.7215	102.923
98.7333	82.8769	84.6378	91.9563
80.3356	68.6506	71.098	76.2222
85.7417	62.8821	69.0608	66.058
88.46	64.7441	77.5753	71.1655
86.4702	71.7272	83.3775	78.7235
85.8947	77.379	85.9094	84.1502
93.5132	85.0332	90.4982	93.8027
93.7467	87.5595	92.268	96.193
89.4106	84.5422	90.1421	94.6954
101.493	94.1389	94.8508	93.8097
0	97.7255	99.9353	98.0786
0	108.896	107.831	108.93
112.793	109.695	108.935	110.709
101.576	106.012	105.95	105.293
108.791	108.991	107.691	106.719
110.689	110.058	107.184	108.864
110.836	105.342	103.256	106.245
107.232	105.194	102.476	104.108
106.382	104.716	103.275	105.872
111.833	98.4579	96.5543	101.74

## Sheet: SWC
obs.	Priori	Individual	Joint
0	132.936	121.932	119.478
148.09	140.872	129.744	126.762
162.495	138.147	129.326	125.797
153.711	120.357	110.929	109.297
121.863	102.08	91.9436	90.7561
114.482	111.314	100.172	99.0098
120.641	104.526	95.2651	94.9118
90.8418	86.0399	80.5783	82.2077
90.7908	85.2677	80.7421	82.8248
90.2424	92.0444	85.6067	88.7166
85.0606	82.3003	79.7442	84.6049
116.188	90.8272	87.7596	87.5133
90	81.2734	80.1732	80.948
81.9439	71.8787	71.8502	76.388
79.7513	69.9741	72.0834	76.4257
76.2222	69.5046	72.5449	75.3825
79.345	80.8349	78.5953	81.3951
71.0754	89.5495	82.9669	84.7302
80.3367	97.8037	89.0264	89.6661
81.6954	90.3021	85.1781	86.6182
71.8731	68.5961	69.0254	71.6734
80.8535	74.8821	74.7814	78.1869
73.1371	67.336	70.2306	72.8881
68.2092	68.7602	70.4477	73.3214
72.19	72.8906	71.4885	74.0037
70.206	79.1679	74.5064	76.3251
80.8744	68.1345	68.6681	69.2285
95.6111	86.6422	83.2665	83.1002
113.419	98.26	92.1029	90.245
135.196	118.845	105.029	105.507
127.735	119.959	106.902	112.508
96.132	105.028	95.5704	102.073
87.6497	86.3766	80.8782	87.4349
91.5152	99.7516	87.3053	93.6479
73.2902	91.8993	81.8975	85.3788
69.9949	81.3469	75.3117	77.6937
78.066	75.8156	71.6928	77.5259
0	98.4645	88.7947	99.2205
102.397	104.238	92.6502	101.882
68.8593	68.9272	66.6522	72.7761
69.725	82.7678	75.9298	83.1982
93.945	97.2848	86.179	92.7413
107.271	102.208	89.8339	97.0861
76.3384	72.0835	68.8054	74.0109
67.1726	74.1815	68.7161	74.1031
75.085	80.3032	71.2919	75.5192
79.0758	75.6733	68.7114	72.6846
78.392	75.2979	69.0046	73.994
77.0101	88.293	79.4259	84.4837
85.4724	90.7789	79.039	83.5245
69.255	71.2915	66.2723	68.657
76.8788	73.815	68.9449	70.7967
88.5584	80.656	72.5555	74.8802
93.055	84.234	74.3425	76.9174
95.2161	89.666	77.8412	81.3532
93.401	92.5325	80.1858	83.1268
88.0051	93.5841	80.6092	83.6001
73.2233	74.9583	68.6513	70.5716
79.0854	79.3654	72.0971	74.2521
91.7259	92.4422	79.8568	83.5815
104.162	97.0935	83.9011	92.3163
89.025	87.6399	77.5744	89.7162
70.702	65.2185	64.1347	72.7115
77.9548	78.8785	72.5712	84.6387
73.23	75.6459	70.4802	82.2268
69.802	73.253	69.3991	78.8273
82.565	91.532	81.734	92.0093
95.5075	101.803	89.4905	102.407
88.54	101.509	90.3763	105.543
114.725	123.081	106.602	122.198
147.167	129.22	112.26	124.682
161.95	133.572	114.967	127.05
132.188	125.785	108.963	119.857
121.035	113.081	100.006	107.829
143.84	126.404	109.639	118.789
158.216	132.571	115.564	125.458
156.307	132.857	115.971	127.557
126.91	108.201	96.6854	106.866
105.874	93.8435	84.5504	96.1763
114.417	103.501	93.2241	109.362
117.354	102.639	94.3598	108.17
0	109.876	98.4952	113.537
0	123.496	107.405	128.188
0	134.158	115.173	140.781
150.278	136.486	118.054	144.578
148.643	131.452	115.06	139.84
106.457	98.4153	90.3752	106.78
101.812	92.9853	86.2744	101.186
100.32	94.0328	86.4197	98.538
0	97.9268	91.4889	106.096
83.6111	86.1627	84.235	99.1155
80.9196	89.4081	84.2388	98.9766
84.2261	86.9724	82.0316	96.4209
0	88.5643	83.1611	100.548
75.4647	86.5281	80.7797	99.5188
78.6683	89.6784	83.6631	102.77
78.46	90.8385	83.5701	100.536
73.7005	78.4913	74.2847	87.8521
59.74	72.1946	69.1783	81.3524
60.0707	68.3033	65.8298	75.5065
63.3807	65.3688	65.0096	73.6212
65.4975	72.3573	69.7986	77.6684
73.0711	79.8034	73.9929	81.931
74.5152	64.5627	62.8791	67.3035
68.7437	62.9718	64.2089	68.2931
58.695	58.0462	63.0778	69.793
71.6701	68.1702	70.7481	78.7263
61.0354	63.5322	66.7714	78.242
69.5176	80.4742	80.1149	92.9915
66.1212	77.83	78.4222	93.6193
72.3265	84.6387	82.0209	92.9469
0	105.399	94.4528	101.893
0	120.548	108.507	120.943
106.081	115.298	106.741	123.789
87.2626	98.4308	93.3374	107.451
101.571	107.424	99.2767	113.365
109.176	118.197	106.967	122.544
123.707	125.381	112.612	129.455
127.633	126.085	113.348	131.166
123.965	118.192	106.993	123.784
105.23	107.773	99.1531	115.18
